# Supplementary material for: Green and effective synthesis of multisubstituted α-pyrones via K2CO3 catalyzed formal insertion of ketenimines into C(CO)–C bonds of 1,3-diketones
Source: Royal Society of Chemistry journal article supplement (doi:10.1039/d3gc02073h), 2023-01-01

## Supporting Information

### Green and Effective Synthesis of Multisubstituted $\alpha$ -Pyrones *via* $K_2CO_3$ Catalyzed Formal Insertion of Ketenimines into C(CO)-C Bonds of 1,3- Diketones

Jian Luo,<sup>[b]†</sup> Ai-Qing Zhong,<sup>[c]†</sup> Jia-Hao Qiu,<sup>[b]†</sup> Xiong-Wei Liu,<sup>\*[a]</sup> You-Ping Tian,<sup>[a]</sup> Bao-Hua  
Zhang,<sup>\*[b]</sup> Guo-Shu Chen,<sup>[b]</sup> Wei Shu,<sup>[d]</sup> and Yun-Lin Liu<sup>\*[b,e]</sup>

Email: liuxiongwei058@gzy.edu.cn; ccbhzhang@gzhu.edu.cn; ylliu@gzhu.edu.cn

|                                                                                            |      |
|--------------------------------------------------------------------------------------------|------|
| 1) General Information                                                                     | S2   |
| 2) General Procedure and Spectral Data of Products <b>3-61</b>                             | S4   |
| 3) General Procedure for the One-Pot Synthesis of Di- and Trisubstituted $\alpha$ -Pyrones | S25  |
| 4) Spectral Data of 4,6-Disubstituted $\alpha$ -Pyrones                                    | S25  |
| 5) Scale-Up Reaction and Transformations of The Products                                   | S27  |
| 6) Mechanistic studies                                                                     | S31  |
| 7) Device Fabrication and Characterizations                                                | S34  |
| 8) Physical and Material Properties                                                        | S35  |
| 9) X-Ray Crystallographic Data for Compounds <b>30, 47, 48, 72</b> and <b>74</b>           | S38  |
| 10) Copies of <sup>1</sup> H NMR and <sup>13</sup> C NMR Spectra of Products <b>3-77</b>   | S43  |
| 11) Copies of HPLC Spectra of Products <b>54-61</b>                                        | S120 |

## 1) General Information

Reactions were monitored by thin layer chromatography using UV light to visualize the course of reaction. Purification of reaction products was carried out by flash chromatography on silica gel. Chemical yields refer to pure isolated substances.  $^1\text{H}$  and  $^{13}\text{C}$  NMR spectra were obtained using a Bruker DPX-400 or Jeol 400 spectrometer. Chemical shifts are reported in ppm from  $\text{CDCl}_3$  with the solvent resonance as the internal standard. The following abbreviations were used to designate chemical shift multiplicities: s=singlet, d=doublet, t = triplet, q=quartet, h=heptet, m=multiplet, br=broad.

Anhydrous solvents, palladium catalysts, Brønsted base catalysts, and 1,3-diphenylpropane-1,3-dione were purchased from Energy Chemical. Unless otherwise stated, all purchased reagents were used without further purification. All reactions involving air- or moisture-sensitive compounds were carried out under nitrogen atmosphere in dried Schlenk tube. The isonitriles,<sup>[1]</sup> diazo compounds,<sup>[2]</sup> ketenimines,<sup>[3]</sup> and 1,3-diones<sup>[4]</sup> were prepared using the literature procedures.

Detailed photophysical studies were performed on compounds **49-51** in solution state ( $10^{-5}$  M). As for absorption measurements, those solution samples were tested by Cary 60 (Agilent) equipment. PL studies were conducted by using Edinburgh FLS1000 fluorescent spectrometer, in which steady state PL spectra were excited at 365 nm by using  $\text{Xe}_2$  xenon lamp, and PL transient decay curves were obtained by using a picosecond pulsed LED (EPLD-365) as light-exciting source. Absolute PL quantum efficiency ( $\phi_{\text{PL}}$ ) of those samples were further measured by using a built-in integration sphere accessory that was coupled to FLS1000 equipment. All those sample were measured in air. To minimize the influence of air on the resultant PL transient and  $\phi_{\text{PL}}$ , all those solution sample were freshly prepared in nitrogen-filled glovebox and then transferred to outside for measuring as soon as possible. Moreover, transient PL photophysical fitting and studies shown in Table S2 were performed according to the standard PL photophysical theory in OLEDs.<sup>[5]</sup>

[1] a) X.-H. Zhao, X.-H. Liu, H.-J. Mei, J. Guo, L.-L. Lin, X.-M. Feng, *Angew. Chem. Int. Ed.* **2015**, *54*, 4032-4035; b) J. M. Saya, B. Oppelaar, R. C. Cioc, G. van der Heijden, C. M. L. Vande Velde, R. V. A. Orru, E. Ruijter, *Chem. Commun.* **2016**, *52*, 12482-12485; c) Z. He, M. Bae, J. Wu, T. F. Jamison, *Angew. Chem. Int. Ed.* **2014**, *53*, 14451-14455.

[2] Y. Xia, D. Qiu, J. Wang, *Chem. Rev.* **2017**, *117*, 13810-13889.

[3] a) J. Luo, G.-S. Chen, S.-J. Chen, Z.-D. Li, Y.-L. Zhao, Y.-L. Liu, *Adv. Synth. Catal.* **2020**, *362*, 3635-3643; b) Z. Liu, S. Cao, J. Wu, G. Zanoni, P. Sivaguru, X. Bi, *ACS Catal.* **2020**, *10*, 12881-12887.

- [4] a) Y. Ning, Q. Song, P. Sivaguru, L. Wu, E. A. Anderson, Xihe Bi, *Org. Lett.* **2022**, *24*, 631-636; b) K. Wu, T. Zhang, Z. Wang, L. Wang, L. Zhan, S. Gong, C. Zhong, Z.-H. Lu, S. Zhang, C. Yang, *J. Am. Chem. Soc.* **2018**, *140*, 8877-8886; c) Q. Zhang, H. Kuwabara, W. J. Potscavage Jr., S. Huang, Y. Hatae, T. Shibata, C. Adachi, *J. Am. Chem. Soc.* **2014**, *136*, 18070-18081.
- [5] Y. Tao, K. Yuan, T. Chen, P. Xu, H. Li, R. Chen, C. Zheng, L. Zhang, W. Huang, *Adv. Mater.* **2014**, *26*, 7931-7958.

## 2) General Procedure and Spectral Data of Products 3-61

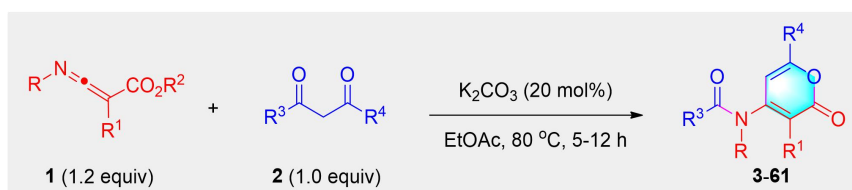

To a 10.0 mL Schlenk tube were successively added ketenimines **1** (0.12 mmol), 1,3-diketones **2** (0.10 mmol), anhydrous EtOAc (1.0 mL), and  $K_2CO_3$  (20 mol%). The reaction mixture was stirred vigorously at 80 °C under  $N_2$  atmosphere till full consumption of 1,3-diketones **2** by TLC analysis. The reaction mixture was then concentrated by rotary vaporation, and the residue was subjected to column chromatography using petroleum ether/ethyl acetate (from 10:1-1:1) as eluent to afford the desired products **3-61**.

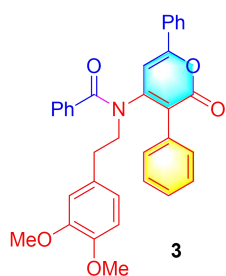

The reaction was run at 80 °C for 5 h, affording product **3** as a pale yellow solid (49.4 mg, 93% yield, m.p. = 151-152 °C);  $^1H$  NMR (500 MHz,  $CDCl_3$ ):  $\delta$  3.00 (brm, 2H), 3.47 (brm, 1H), 3.77 (s, 3H), 3.85 (s, 3H), 4.35 (brm, 1H), 5.77 (s, 1H), 6.72 (s, 1H), 6.79 (d,  $J = 7.5$  Hz, 1H), 6.88 (d,  $J = 8.0$  Hz, 1H), 6.97 (d,  $J = 4.5$  Hz, 2H), 7.04 (d,  $J = 7.5$  Hz, 2H), 7.18 (t,  $J = 7.5$  Hz, 2H), 7.29-7.37 (m, 4H), 7.42-7.47 (m, 3H), 7.54-7.56 (m, 2H);  $^{13}C$  NMR (125 MHz,  $CDCl_3$ ):  $\delta$  169.69, 162.22, 158.57, 153.54, 149.22, 147.98, 134.51, 131.69, 131.23, 131.16, 130.03, 130.41, 128.81, 128.79, 128.40, 128.27, 127.99, 127.80, 125.40, 121.25, 120.72, 112.35, 102.39, 55.78, 55.73, 53.17, 33.04; IR (ATR): 1709, 1668, 1632, 1548, 1514, 1438, 1315, 1260, 1237, 1153, 1141, 1026, 904, 769, 691, 644, 572. HRMS (ESI): Exact mass calcd for  $C_{34}H_{29}NO_5Na$  [ $M+Na$ ] $^+$ : 554.1938, Found: 554.1932.

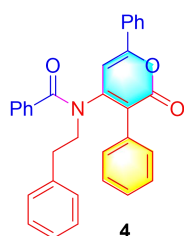

The reaction was run at 80 °C for 5 h, affording product **4** as a pale yellow solid (46.2 mg, 98% yield, m.p. = 182-183 °C);  $^1H$  NMR (400 MHz,  $CDCl_3$ ):  $\delta$  3.09 (brm, 2H), 3.81 (brm, 2H), 5.79 (s, 1H), 6.99-7.00 (m, 2H), 7.06-7.08 (m, 2H), 7.18-7.26 (m, 4H), 7.32-7.35 (m, 4H), 7.37-7.47 (m, 6H), 7.55 (d,  $J = 6.8$  Hz, 2H);  $^{13}C$  NMR (100 MHz,  $CDCl_3$ ):  $\delta$  169.83, 162.30, 158.61, 153.50, 139.31, 134.60, 131.31, 131.16, 131.05, 130.46, 129.87, 129.48, 128.90, 128.73, 128.49, 128.36, 128.03, 127.89, 126.94, 125.60, 120.83, 102.49, 52.97, 33.70; IR (ATR): 1708, 1651, 1629, 1548, 1494, 1450, 1395, 1321, 796, 755, 695, 642, 574. HRMS (ESI): Exact mass calcd for  $C_{32}H_{25}NO_3Na$  [ $M+Na$ ] $^+$ : 494.1727, Found: 494.1717.



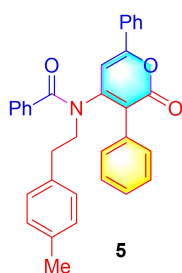

The reaction was run at 80 °C for 5 h, affording product **5** as a pale yellow solid (45.1 mg, 93% yield, m.p. = 181-182 °C); <sup>1</sup>H NMR (400 MHz, CDCl<sub>3</sub>): δ 2.37 (s, 3H), 3.04 (brm, 2H), 3.49-4.29 (brm, 2H), 5.68 (s, 1H), 6.97-6.98 (m, 2H), 7.06 (d, *J* = 7.6 Hz, 2H), 7.14 (d, *J* = 7.2 Hz, 2H), 7.18-7.23 (m, 4H), 7.31-7.39 (m, 4H), 7.41-7.47 (m, 3H), 7.54 (d, *J* = 6.4 Hz, 2H); <sup>13</sup>C NMR (100 MHz, CDCl<sub>3</sub>): δ 169.77, 162.31, 158.44, 153.70, 136.62, 136.34, 134.65, 131.32, 131.13, 130.97, 130.52, 129.90, 129.58, 129.45, 128.76, 128.46, 128.33, 128.06, 127.85, 125.51, 120.89, 102.49, 53.34, 33.16, 21.07; IR (ATR): 1706, 1653, 1627, 1544, 1497, 1442, 1391, 1317, 814, 786, 768, 717, 692, 643, 573. HRMS (ESI): Exact mass calcd for C<sub>33</sub>H<sub>27</sub>NO<sub>3</sub>Na [M+Na]<sup>+</sup>: 508.1883, Found: 508.1877.

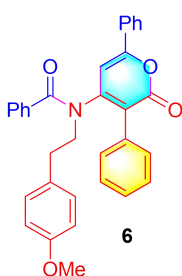

The reaction was run at 80 °C for 5 h, affording product **6** as a pale green solid (44.6 mg, 89% yield, m.p. = 163-164 °C); <sup>1</sup>H NMR (400 MHz, CDCl<sub>3</sub>): δ 3.02 (brm, 2H), 3.51-4.25 (brm, 2H), 3.79 (s, 3H), 5.74 (s, 1H), 6.91-6.94 (m, 2H), 6.99 (d, *J* = 4.8 Hz, 2H), 7.06 (d, *J* = 7.2 Hz, 2H), 7.16 (d, *J* = 8.4 Hz, 2H), 7.20 (t, *J* = 8.0 Hz, 2H), 7.30-7.38 (m, 4H), 7.41-7.49 (m, 3H), 7.54-7.56 (m, 2H); <sup>13</sup>C NMR (100 MHz, CDCl<sub>3</sub>): δ 169.77, 162.33, 158.68, 158.49, 153.68, 134.67, 131.34, 131.28, 131.13, 131.03, 130.49, 129.88, 128.79, 128.48, 128.35, 128.03, 127.88, 125.55, 120.86, 114.24, 102.59, 55.20, 53.36, 32.80; IR (ATR): 1707, 1661, 1631, 1547, 1512, 1396, 1241, 1174, 1032, 826, 787, 769, 721, 697, 641, 572. HRMS (ESI): Exact mass calcd for C<sub>33</sub>H<sub>27</sub>NO<sub>4</sub>Na [M+Na]<sup>+</sup>: 524.1832, Found: 524.1824.

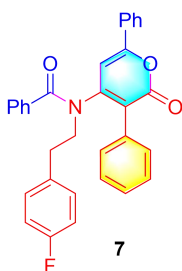

The reaction was run at 80 °C for 5 h, affording product **7** as a pale yellow solid (47.4 mg, 97% yield, m.p. = 175-176 °C); <sup>1</sup>H NMR (400 MHz, CDCl<sub>3</sub>): δ 3.05 (brm, 2H), 3.81 (brm, 2H), 5.81 (s, 1H), 7.00-7.01 (m, 2H), 7.05-7.10 (m, 4H), 7.18-7.23 (m, 4H), 7.30-7.40 (m, 4H), 7.43-7.48 (m, 3H), 7.55-7.57 (m, 2H); <sup>13</sup>C NMR (100 MHz, CDCl<sub>3</sub>): δ 169.80, 162.27, 161.91 (d, *J* = 245 Hz), 158.73, 153.36, 134.94, 134.51, 131.28, 131.26, 131.19, 130.88 (d, *J* = 8.0 Hz), 130.43, 129.82, 128.90, 128.57, 128.42, 128.00, 127.97, 125.49, 120.81, 115.72 (d, *J* = 21 Hz), 102.47, 52.83, 32.98; <sup>19</sup>F NMR (376 MHz, CDCl<sub>3</sub>) δ -115.60; IR (ATR): 1711, 1658, 1622, 1534, 1503, 1402, 1211, 1152, 1045, 851, 781, 751, 682, 636, 557. HRMS (ESI): Exact mass calcd for C<sub>32</sub>H<sub>24</sub>FNO<sub>3</sub>Na [M+Na]<sup>+</sup>: 512.1632, Found: 512.1627.

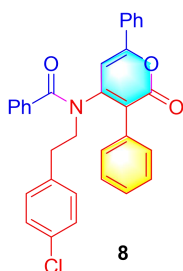

The reaction was run at 80 °C for 5 h, affording product **8** as a pale yellow solid (48.0 mg, 95% yield, m.p. = 184-185 °C);  $^1\text{H}$  NMR (500 MHz,  $\text{CDCl}_3$ ):  $\delta$  3.04 (brm, 2H), 3.75 (brm, 2H), 5.73 (s, 1H), 6.98 (d,  $J = 7.5$  Hz, 2H), 7.08 (d,  $J = 9.0$  Hz, 2H), 7.16-7.23 (m, 4H), 7.30-7.35 (m, 3H), 7.35-7.39 (m, 3H), 7.47-7.49 (m, 3H), 7.53-7.55 (m, 2H);  $^{13}\text{C}$  NMR (100 MHz,  $\text{CDCl}_3$ ):  $\delta$  169.75, 162.22, 158.79, 153.38, 137.90, 134.43, 133.02, 131.29, 131.22, 131.17, 130.86, 130.35, 129.83, 129.03, 129.01, 128.56, 128.38, 128.01, 127.95, 125.46, 120.96, 102.25, 52.90, 33.06; IR (ATR): 1706, 1662, 1630, 1545, 1489, 1445, 1395, 1277, 1172, 1085, 1016, 932, 814, 769, 721, 697, 643, 574, 544. HRMS (ESI): Exact mass calcd for  $\text{C}_{32}\text{H}_{24}\text{NO}_3\text{ClNa}$   $[\text{M}+\text{Na}]^+$ : 528.1337, Found: 528.1326.

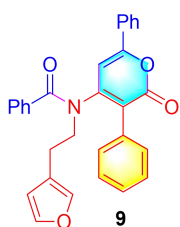

The reaction was run at 80 °C for 6 h, affording product **9** as a pale yellow solid (42.0 mg, 91% yield, m.p. = 108-109 °C);  $^1\text{H}$  NMR (400 MHz,  $\text{CDCl}_3$ ):  $\delta$  3.10 (brm, 2H), 3.65-4.15 (brm, 2H), 6.01 (s, 1H), 6.14 (s, 1H), 6.37-6.39 (m, 1H), 7.03 (brs, 2H), 7.07 (d,  $J = 7.6$  Hz, 2H), 7.20 (t,  $J = 7.2$  Hz, 2H), 7.33-7.38 (m, 4H), 7.42 (s, 1H), 7.44-7.51 (m, 3H), 7.71-7.73 (m, 2H);  $^{13}\text{C}$  NMR (100 MHz,  $\text{CDCl}_3$ ):  $\delta$  169.83, 162.38, 158.64, 153.39, 152.76, 141.72, 134.53, 131.31, 131.16, 131.08, 130.61, 129.85, 128.83, 128.50, 128.39, 128.00, 127.90, 125.62, 120.59, 110.87, 107.83, 102.59, 49.86, 26.17; IR (ATR): 1703, 1653, 1628, 1538, 1494, 1443, 1392, 1324, 1181, 1076, 919, 163, 746, 682, 641, 604, 570. HRMS (ESI): Exact mass calcd for  $\text{C}_{30}\text{H}_{23}\text{NO}_4\text{Na}$   $[\text{M}+\text{Na}]^+$ : 484.1519, Found: 484.1510.

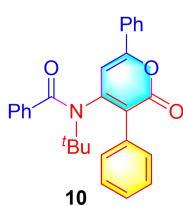

The reaction was run at 80 °C for 12 h, affording product **10** as a pale-green solid (22.4 mg, 53% yield, m.p. = 109-110 °C);  $^1\text{H}$  NMR (400 MHz,  $\text{CDCl}_3$ ):  $\delta$  1.53 (s, 9H), 6.66 (s, 1H), 7.09-7.12 (m, 2H), 7.19-7.23 (m, 4H), 7.28-7.33 (m, 1H), 7.36-7.38 (m, 3H), 7.49-7.53 (m, 3H), 7.82-7.84 (m, 2H);  $^{13}\text{C}$  NMR (100 MHz,  $\text{CDCl}_3$ ):  $\delta$  169.30, 162.62, 157.08, 151.61, 137.71, 131.42, 131.26, 130.57, 130.13, 129.77, 129.11, 128.78, 127.98, 127.68, 127.48, 125.70, 125.58, 106.49, 60.55, 29.23; IR (ATR): 1696, 1652, 1622, 1548, 1451, 1370, 1331, 1179, 769, 689, 661, 630, 571. HRMS (ESI): Exact mass calcd for  $\text{C}_{28}\text{H}_{25}\text{NO}_3\text{Na}$   $[\text{M}+\text{Na}]^+$ : 446.1727, Found: 446.1718.

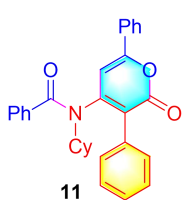

The reaction was run at 80 °C for 8 h, affording product **11** as a pale green solid (37.7 mg, 84% yield, m.p. = 92-93 °C);  $^1\text{H}$  NMR (400 MHz,  $\text{CDCl}_3$ ):  $\delta$  1.09-1.23 (m, 3H), 1.62-1.67 (m, 3H), 1.76-1.84 (m, 4H), 4.05 (s, 1H), 6.71 (s, 1H), 7.10 (d,  $J = 7.2$  Hz, 2H), 7.16 (brs, 2H), 7.22 (t,  $J = 7.6$  Hz, 2H), 7.33-7.37 (m, 4H), 7.50-7.51 (m, 3H), 7.85-7.87 (m, 2H);  $^{13}\text{C}$  NMR (100 MHz,  $\text{CDCl}_3$ ):  $\delta$  170.18,

162.50, 157.78, 151.03, 135.72, 131.70, 131.12, 130.75, 130.52, 129.87, 129.01, 128.46, 128.15, 127.95, 127.45, 125.60, 104.68, 60.47, 31.81, 26.09, 25.35; IR (ATR): 1701, 1651, 1629, 1540, 1495, 1450, 1301, 903, 765, 687, 646, 567. HRMS (ESI): Exact mass calcd for  $C_{30}H_{27}NO_3Na$   $[M+Na]^+$ : 472.1883, Found: 472.1875.

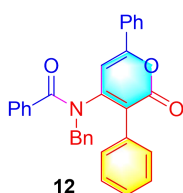

The reaction was run at 80 °C for 8 h, affording product **12** as a pale green solid (39.8 mg, 87% yield, m.p. = 141-142 °C);  $^1H$  NMR (400 MHz,  $CDCl_3$ ):  $\delta$  4.79 (brs, 2H), 6.54 (s, 1H), 6.94 (d,  $J$  = 6.0 Hz, 2H), 7.20-7.26 (m, 4H), 7.30-7.39 (m, 9H), 7.43-7.49 (m, 3H), 7.64-7.67 (m, 2H);  $^{13}C$  NMR (100 MHz,  $CDCl_3$ ):  $\delta$  169.78, 162.40, 158.54, 152.58, 136.44, 134.36, 131.22, 131.14, 130.59, 129.68, 128.93, 128.89, 128.50, 128.40, 128.36, 128.11, 128.02, 125.54, 120.71, 102.74, 52.19; IR (ATR): 1723, 1661, 1629, 1551, 1492, 1448, 1400, 1327, 1270, 1027, 906, 796, 761, 699, 645, 628, 604, 571. HRMS (ESI): Exact mass calcd for  $C_{31}H_{23}NO_3Na$   $[M+Na]^+$ : 480.1570, Found: 480.1560.

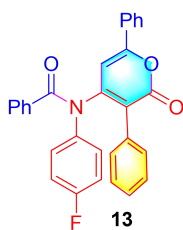

The reaction was run at 80 °C for 5 h, affording product **13** as a pale green solid (42.4 mg, 92% yield, m.p. = 186-187 °C);  $^1H$  NMR (400 MHz,  $CDCl_3$ ):  $\delta$  6.67 (s, 1H), 6.84 (d,  $J$  = 6.0 Hz, 4H), 7.17-7.21 (m, 4H), 7.23-7.26 (m, 5H), 7.35 (tt,  $J$  = 7.2, 1.2 Hz, 1H), 7.42-7.49 (m, 3H), 7.80-7.82 (m, 2H);  $^{13}C$  NMR (100 MHz,  $CDCl_3$ ):  $\delta$  169.92, 162.64, 160.78 (d,  $J$  = 247 Hz), 159.11, 153.07, 137.43 (d,  $J$  = 2.8 Hz), 133.91, 131.74, 131.43, 131.10, 130.73, 129.42, 128.92, 128.87, 128.47, 128.31, 128.26, 128.18, 128.02, 125.64, 122.07, 116.03 (d,  $J$  = 23 Hz), 103.04;  $^{19}F$  NMR (376 MHz,  $CDCl_3$ )  $\delta$  -113.91; IR (ATR): 1721, 1658, 1613, 1551, 1456, 1431, 1322, 1245, 1072, 1002, 889, 789, 667, 653, 627, 569. HRMS (ESI): Exact mass calcd for  $C_{30}H_{20}FNO_3Na$   $[M+Na]^+$ : 484.1319, Found: 484.1319.

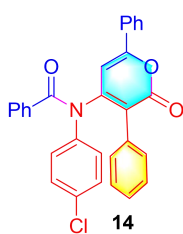

The reaction was run at 80 °C for 5 h, affording product **14** as a pale yellow solid (44.8 mg, 94% yield, m.p. = 193-194 °C);  $^1H$  NMR (400 MHz,  $CDCl_3$ ):  $\delta$  6.68 (t,  $J$  = 4.0 Hz, 1H), 6.86 (s, 2H), 7.14-7.27 (m, 11H), 7.38 (t,  $J$  = 5.2 Hz, 1H), 7.46-7.49 (m, 3H), 7.82-7.84 (m, 2H);  $^{13}C$  NMR (100 MHz,  $CDCl_3$ ):  $\delta$  169.78, 162.54, 159.15, 152.79, 139.88, 133.70, 132.33, 131.56, 131.13, 130.58, 129.35, 129.19, 128.89, 128.85, 128.50, 128.29, 128.02, 127.56, 125.60, 122.23, 102.92; IR (ATR): 1718, 1649, 1607, 1548, 1486, 1447, 1316, 1288, 1091, 1011, 936, 829, 785, 685, 653, 626, 599, 572. HRMS (ESI): Exact mass calcd for  $C_{30}H_{20}ClNO_3Na$   $[M+Na]^+$ : 500.1024, Found: 500.1025.

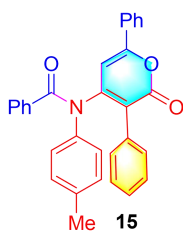

The reaction was run at 80 °C for 5 h, affording product **15** as a pale green solid (41.6 mg, 91% yield, m.p. = 165-166 °C);  $^1\text{H}$  NMR (400 MHz,  $\text{CDCl}_3$ ):  $\delta$  2.28 (s, 3H), 6.62 (s, 1H), 6.84 (d,  $J = 7.6$  Hz, 2H), 6.99 (d,  $J = 8.0$  Hz, 2H), 7.14-7.18 (m, 2H), 7.21-7.26 (m, 7H), 7.32 (tt,  $J = 7.2, 1.2$  Hz, 1H), 7.41-7.45 (m, 3H), 7.79-7.81 (m, 2H);  $^{13}\text{C}$  NMR (100 MHz,  $\text{CDCl}_3$ ):  $\delta$  169.86, 162.74, 158.95, 153.00, 138.78, 136.86, 134.30, 131.88, 131.17, 130.94, 130.87, 129.82, 129.47, 128.89, 128.85, 128.31, 128.22, 127.83, 126.40, 125.62, 122.06, 103.07, 20.95; IR (ATR): 1711, 1657, 1619, 1551, 1511, 1448, 1289, 1177, 1070, 1026, 791, 766, 689, 636, 609, 566, 513. HRMS (ESI): Exact mass calcd for  $\text{C}_{31}\text{H}_{23}\text{NO}_3\text{Na}$   $[\text{M}+\text{Na}]^+$ : 480.1570, Found: 480.1568.

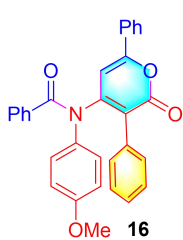

The reaction was run at 80 °C for 5 h, affording product **16** as a pale green solid (44.0 mg, 93% yield, m.p. = 168-169 °C);  $^1\text{H}$  NMR (400 MHz,  $\text{CDCl}_3$ ):  $\delta$  3.75 (s, 3H), 6.66 (s, 1H), 6.70 (d,  $J = 8.4$  Hz, 2H), 6.85 (d,  $J = 8.0$  Hz, 2H), 7.17 (t,  $J = 7.6$  Hz, 2H), 7.23-7.27 (m, 6H), 7.32 (t,  $J = 8.0$  Hz, 2H), 7.42-7.46 (m, 3H), 7.80-7.82 (m, 2H);  $^{13}\text{C}$  NMR (100 MHz,  $\text{CDCl}_3$ ):  $\delta$  169.85, 162.79, 158.89, 158.08, 153.06, 134.17, 134.07, 131.89, 131.10, 130.94, 130.77, 129.38, 128.83, 128.31, 128.24, 127.84, 125.57, 121.73, 114.37, 103.00, 55.37; IR (ATR): 1712, 1653, 1607, 1549, 1507, 1447, 1245, 1172, 1026, 831, 792, 766, 689, 639, 609, 562, 519. HRMS (ESI): Exact mass calcd for  $\text{C}_{31}\text{H}_{23}\text{NO}_4\text{Na}$   $[\text{M}+\text{Na}]^+$ : 496.1519, Found: 496.1520.

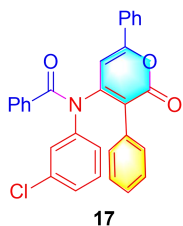

The reaction was run at 80 °C for 10 h, affording product **17** as a pale yellow solid (44.8 mg, 94% yield, m.p. = 193-194 °C);  $^1\text{H}$  NMR (500 MHz,  $\text{CDCl}_3$ ):  $\delta$  6.65 (s, 1H), 6.77 (s, 1H), 6.92 (s, 1H), 7.06-7.12 (m, 2H), 7.15-7.16 (m, 2H), 7.20-7.23 (m, 2H), 7.23-7.27 (m, 5H), 7.37 (t,  $J = 7.5$  Hz, 1H), 7.44-7.49 (m, 3H), 7.82 (dd,  $J = 7.5, 2.0$  Hz, 2H);  $^{13}\text{C}$  NMR (125 MHz,  $\text{CDCl}_3$ ):  $\delta$  169.83, 162.55, 159.25, 152.75, 142.52, 134.70, 133.72, 131.71, 131.46, 131.18, 130.68, 129.90, 129.44, 128.94, 128.91, 128.59, 128.33, 128.08, 126.89, 126.59, 125.70, 124.69, 122.40, 102.97; IR (ATR): 1719, 1662, 1631, 1552, 1474, 1324, 1076, 917, 763, 686, 596. HRMS (ESI): Exact mass calcd for  $\text{C}_{30}\text{H}_{20}\text{ClNO}_3\text{Na}$   $[\text{M}+\text{Na}]^+$ : 500.1024, Found: 500.1020.

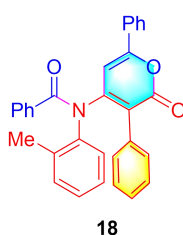

The reaction was run at 80 °C for 10 h, affording product **18** as a pale green solid (42.5 mg, 93% yield, m.p. = 189-190 °C);  $^1\text{H}$  NMR (500 MHz,  $\text{CDCl}_3$ ):  $\delta$  2.11 (s, 3H), 6.47 (s, 1H), 7.03-7.11 (m, 4H), 7.16-7.24 (m, 7H), 7.28 (brm, 2H), 7.36 (t,  $J = 7.5$  Hz, 1H), 7.41-7.47 (m, 3H), 7.73-7.74 (m, 2H);  $^{13}\text{C}$  NMR

(125 MHz, CDCl<sub>3</sub>):  $\delta$  169.73, 162.90, 158.52, 152.98, 140.21, 135.16, 134.17, 131.94, 131.63, 131.50, 130.99, 130.83, 129.50, 128.89, 128.69, 128.28, 128.12, 127.98, 127.94, 127.16, 125.62, 119.95, 102.57, 18.71; IR (ATR): 1721, 1675, 1623, 1547, 1462, 1401, 1375, 1062, 932, 757, 682, 574. HRMS (ESI): Exact mass calcd for C<sub>31</sub>H<sub>23</sub>NO<sub>3</sub>Na [M+Na]<sup>+</sup>: 480.1570, Found: 480.1566.

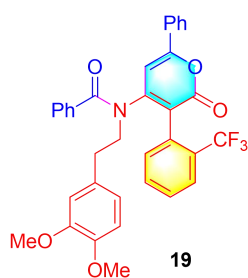

The reaction was run at 80 °C for 12 h, affording product **19** as a pale yellow solid (37.1 mg, 62% yield, m.p. = 167-168 °C); <sup>1</sup>H NMR (400 MHz, CDCl<sub>3</sub>):  $\delta$  2.79-2.86 (m, 1H), 2.91-2.98 (m, 1H), 3.54 (brm, 1H), 3.74 (s, 3H), 3.86 (s, 3H), 3.89 (brm, 1H), 5.94 (s, 1H), 6.62 (s, 1H), 6.70 (dd, *J* = 8.0, 1.2 Hz, 1H), 6.78-6.91 (m, 2H), 7.24 (d, *J* = 7.2 Hz, 2H), 7.32 (t, *J* = 8.0 Hz, 2H), 7.43-7.49 (m, 5H), 7.52 (t, *J* = 7.6 Hz, 1H), 7.60-7.62 (m, 2H), 7.70 (d, *J* = 8.0 Hz, 1H); <sup>13</sup>C NMR (100 MHz, CDCl<sub>3</sub>):  $\delta$  169.73, 161.91, 159.24, 153.82, 149.28, 148.06, 134.75, 132.29, 131.83, 131.56, 131.28, 131.17, 130.41, 129.70, 129.42, 129.40, 129.20, 128.91, 128.42, 128.24, 127.49 (q, *J* = 3.3 Hz), 123.87 (q, *J* = 273 Hz), 121.19, 112.30, 111.32, 102.66, 55.87, 55.72, 52.98, 33.42; <sup>19</sup>F NMR (376 MHz, CDCl<sub>3</sub>)  $\delta$  -59.09; IR (ATR): 1717, 1672, 1610, 1544, 1450, 1398, 1366, 1055, 913, 742, 657, 565. HRMS (ESI): Exact mass calcd for C<sub>35</sub>H<sub>28</sub>NO<sub>5</sub>F<sub>3</sub>Na [M+Na]<sup>+</sup>: 622.1812, Found: 622.1812.

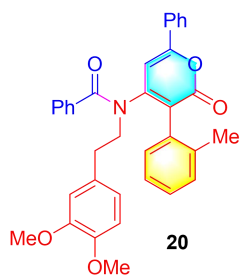

The reaction was run at 80 °C for 12 h, affording product **20** as a pale yellow solid (39.2 mg, 72% yield, m.p. = 155-156 °C); <sup>1</sup>H NMR (400 MHz, CDCl<sub>3</sub>):  $\delta$  1.39 (brm, 3H), 2.85-2.91 (m, 1H), 3.09 (brs, 1H), 3.54 (brs, 1H), 3.75 (s, 3H), 3.91 (s, 3H), 4.24 (brm, 1H), 5.79 (s, 1H), 6.70 (s, 1H), 6.78-6.80 (m, 1H), 6.91 (d, *J* = 7.6 Hz, 1H), 6.96 (d, *J* = 7.6 Hz, 1H), 7.11 (brm, 3H), 7.20-7.30 (m, 4H), 7.39 (t, *J* = 7.6 Hz, 1H), 7.43-7.48 (m, 3H), 7.58-7.60 (m, 2H); <sup>13</sup>C NMR (100 MHz, CDCl<sub>3</sub>):  $\delta$  169.72, 161.21, 159.10, 154.91, 149.31, 148.07, 134.87, 131.43, 131.14, 130.78, 130.59, 130.52, 129.89, 128.98, 128.89, 128.45, 128.10, 125.70, 125.52, 121.29, 112.52, 111.34, 55.90, 55.79, 33.15, 18.99; IR (ATR): 1714, 1654, 1630, 1550, 1517, 1447, 1390, 1319, 1261, 1243, 1160, 1136, 1080, 1028, 911, 864, 805, 762, 716, 689, 640, 580, 544. HRMS (ESI): Exact mass calcd for C<sub>35</sub>H<sub>31</sub>NO<sub>5</sub>Na [M+Na]<sup>+</sup>: 568.2094, Found: 568.2101.

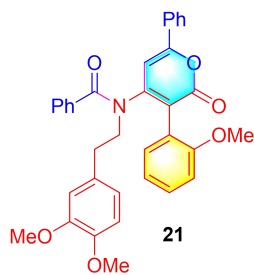

The reaction was run at 80 °C for 12 h, affording product **21** as a pale yellow solid (32.0 mg, 57% yield, m.p. = 143-144 °C); <sup>1</sup>H NMR (400 MHz, CDCl<sub>3</sub>): δ 2.92 (brm, 2H), 3.64 (brm, 4H), 3.77 (s, 3H), 3.85 (s, 3H), 4.12 (brm, 1H), 5.75 (s, 1H), 6.69 (s, 1H), 6.76 (d, *J* = 8.0 Hz, 1H), 6.85-6.89 (m, 3H), 7.18-7.25 (m, 4H), 7.31-7.45 (m, 6H), 7.52-7.54 (m, 2H); <sup>13</sup>C NMR (100 MHz, CDCl<sub>3</sub>): δ 169.60, 158.31, 149.20, 147.94,

134.79, 131.88, 131.17, 130.87, 130.73, 130.25, 129.45, 128.78, 128.38, 127.91, 125.45, 121.27, 120.62, 120.16, 115.29, 112.45, 111.24, 110.70, 102.53, 55.82, 55.78, 55.18, 52.28, 33.20; IR (ATR): 1702, 1668, 1637, 1549, 1514, 1452, 1398, 1320, 1286, 1239, 1154, 1139, 1024, 911, 858, 804, 774, 757, 722, 696, 665, 647, 626, 569, 523. HRMS (ESI): Exact mass calcd for C<sub>35</sub>H<sub>31</sub>NO<sub>6</sub>Na [M+Na]<sup>+</sup>: 584.2044, Found: 584.2047.

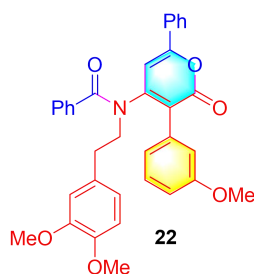

The reaction was run at 80 °C for 10 h, affording product **22** as a pale yellow solid (48.8 mg, 87% yield, m.p. = 92-93 °C); <sup>1</sup>H NMR (400 MHz, CDCl<sub>3</sub>): δ 3.03 (brm, 2H), 3.51 (brm, 1H), 3.70 (s, 3H), 3.77 (s, 3H), 3.86 (s, 3H), 4.26 (brm, 1H), 5.77 (s, 1H), 6.40 (s, 1H), 6.60 (d, *J* = 7.2 Hz, 1H), 6.72 (s, 1H), 6.80 (d, *J* = 8.4 Hz, 1H), 6.87-6.89 (m, 2H), 7.07

(d, *J* = 7.2 Hz, 2H), 7.20 (t, *J* = 7.6 Hz, 2H), 7.24 (t, *J* = 8.0 Hz, 1H), 7.36 (t, *J* = 7.6 Hz, 1H), 7.42-7.46 (m, 3H), 7.54-7.56 (m, 2H); <sup>13</sup>C NMR (100 MHz, CDCl<sub>3</sub>): δ 169.67, 162.17, 159.29, 158.68, 153.73, 149.32, 148.07, 134.62, 132.43, 131.81, 131.17, 131.10, 130.47, 129.33, 128.86, 128.07, 127.83, 125.47, 121.93, 121.31, 120.52, 115.11, 114.69, 112.44, 111.33, 102.38, 55.84, 55.79, 55.07, 53.27, 33.12; IR (ATR): 1704, 1654, 1630, 1514, 1492, 1452, 1390, 1317, 1266, 1240, 1157, 1025, 837, 805, 775, 715, 691, 642, 628. HRMS (ESI): Exact mass calcd for C<sub>35</sub>H<sub>31</sub>NO<sub>6</sub>Na [M+Na]<sup>+</sup>: 584.2044, Found: 584.2054.

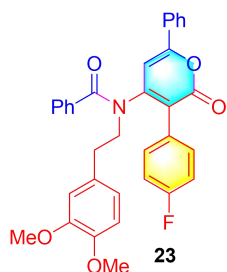

The reaction was run at 80 °C for 5 h, affording product **23** as a pale yellow solid (52.7 mg, 96% yield, m.p. = 197-198 °C); <sup>1</sup>H NMR (400 MHz, CDCl<sub>3</sub>): δ 3.05 (brm, 2H), 3.72 (brm, 2H), 3.77 (s, 3H), 3.87 (s, 3H), 5.79 (s, 1H), 6.73 (s, 1H), 6.80 (d, *J* = 9.2 Hz, 1H), 6.89-6.93 (m, 3H), 6.98-7.02 (m, 2H), 7.05-7.07 (m, 2H), 7.20 (t, *J* = 8.0 Hz, 2H), 7.37 (t, *J* = 7.6 Hz, 1H), 7.42-7.49 (m, 3H), 7.55-7.57 (m, 2H); <sup>13</sup>C NMR (100 MHz, CDCl<sub>3</sub>): δ 169.63,

162.51 (d, *J* = 248 Hz), 162.19, 158.90, 153.78, 149.37, 148.13, 134.41, 131.84 (d, *J* = 8.0 Hz), 131.72, 131.39, 131.21, 130.39, 128.89, 128.03, 127.92, 127.23 (d, *J* = 3.2 Hz), 125.49, 121.31, 119.84, 115.54, 115.33, 112.46, 111.37, 102.13, 55.86, 55.80, 53.35, 33.10. <sup>19</sup>F NMR (376 MHz, CDCl<sub>3</sub>) δ -112.16; IR (ATR): 1710, 1668, 1627, 1544, 1515, 1436, 1387, 1259,



1238, 1140, 1085, 1024, 910, 844, 807, 772, 715, 694, 644, 592, 518. HRMS (ESI): Exact mass calcd for  $C_{34}H_{28}FNO_5Na$   $[M+Na]^+$ : 572.1844, Found: 572.1840.

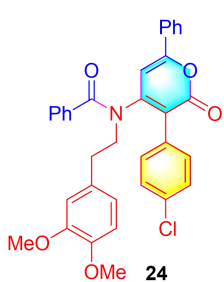

The reaction was run at 80 °C for 5 h, affording product **24** as a pale yellow solid (53.7 mg, 95% yield, m.p. = 173-174 °C);  $^1H$  NMR (400 MHz,  $CDCl_3$ ):  $\delta$  3.05 (brm, 2H), 3.63 (brm, 1H), 3.77 (s, 3H), 3.88 (s, 3H), 4.12 (brm, 1H), 5.78 (s, 1H), 6.73 (s, 1H), 6.80-6.91 (m, 4H), 7.04-7.06 (m, 2H), 7.20 (t,  $J = 8.0$  Hz, 2H), 7.26-7.29 (m, 2H), 7.37 (tt,  $J = 7.6, 1.2$  Hz, 1H), 7.43-7.48 (m, 3H), 7.55-7.57 (m, 2H);  $^{13}C$  NMR (100 MHz,  $CDCl_3$ ):  $\delta$  169.60, 161.99, 159.08, 153.92, 149.38, 148.14, 134.46, 134.37, 131.68, 131.42, 131.27, 130.34, 129.76, 128.91, 128.57, 128.06, 127.97, 125.52, 121.31, 119.60, 112.44, 111.38, 102.11, 55.86, 55.81, 53.38, 33.09; IR (ATR): 1703, 1654, 1612, 1533, 1501, 1424, 1390, 1267, 1244, 1136, 1095, 1033, 931, 861, 767, 721, 652, 574. HRMS (ESI): Exact mass calcd for  $C_{34}H_{28}NO_5ClNa$   $[M+Na]^+$ : 588.1548, Found: 588.1543.

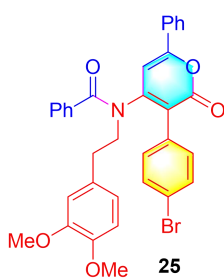

The reaction was run at 80 °C for 5 h, affording product **25** as a pale yellow solid (57.2 mg, 94% yield, m.p. = 168-169 °C);  $^1H$  NMR (400 MHz,  $CDCl_3$ ):  $\delta$  3.06 (brm, 2H), 3.62 (brm, 1H), 3.77 (s, 3H), 3.87 (s, 3H), 4.14 (brm, 1H), 5.78 (s, 1H), 6.73 (s, 1H), 6.78-6.82 (m, 3H), 6.90 (d,  $J = 8.0$  Hz, 1H), 7.05 (d,  $J = 7.6$  Hz, 2H), 7.20 (t,  $J = 7.6$  Hz, 2H), 7.35-7.39 (m, 1H), 7.41-7.48 (m, 5H), 7.54-7.57 (m, 2H);  $^{13}C$  NMR (100 MHz,  $CDCl_3$ ):  $\delta$  169.60, 161.92, 159.10, 153.89, 149.39, 148.15, 134.37, 131.68, 131.53, 131.43, 131.29, 130.35, 130.25, 128.91, 128.07, 127.98, 125.53, 122.73, 121.32, 119.61, 112.45, 111.39, 102.12, 55.87, 55.81, 53.39, 33.10. IR (ATR): 1720, 1657, 1631, 1550, 1511, 1412, 1355, 1243, 1255, 1124, 1045, 1032, 925, 832, 673, 567. HRMS (ESI): Exact mass calcd for  $C_{34}H_{28}BrNO_5Na$   $[M+Na]^+$ : 632.1043, Found: 632.1041.

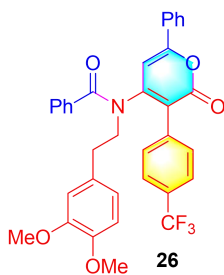

The reaction was run at 80 °C for 5 h, affording product **26** as a pale yellow solid (55.1 mg, 92% yield, m.p. = 190-191 °C);  $^1H$  NMR (400 MHz,  $CDCl_3$ ):  $\delta$  3.09 (brm, 2H), 3.65 (brm, 1H), 3.77 (s, 3H), 3.88 (s, 3H), 4.08 (brm, 1H), 5.81 (s, 1H), 6.74 (s, 1H), 6.82 (d,  $J = 8.0$  Hz, 1H), 6.91 (d,  $J = 8.0$  Hz, 1H), 6.97 (d,  $J = 7.6$  Hz, 2H), 7.01 (d,  $J = 8.0$  Hz, 2H), 7.18 (t,  $J = 8.0$  Hz, 2H), 7.37 (t,  $J = 7.2$  Hz, 1H), 7.44-7.49 (m, 3H), 7.53-7.58 (m, 4H);  $^{13}C$  NMR (100 MHz,  $CDCl_3$ ):  $\delta$  169.40, 161.80, 159.67, 154.51, 149.46, 148.22, 135.15 (q,  $J = 1.2$  Hz), 134.14, 131.68, 131.55, 131.47, 130.35, 130.26, 130.04, 128.96, 128.02, 128.00, 125.61, 125.20 (q,  $J = 3.7$  Hz), 123.89 (q,  $J = 272$  Hz), 121.35, 119.16, 112.47,

111.44, 101.85, 55.88, 55.82, 53.65, 33.06;  $^{19}\text{F}$  NMR (376 MHz,  $\text{CDCl}_3$ )  $\delta$  -62.82; IR (ATR): 1713, 1671, 1628, 1543, 1521, 1402, 1378, 1225, 1154, 1033, 934, 815, 663, 587. HRMS (ESI): Exact mass calcd for  $\text{C}_{35}\text{H}_{28}\text{F}_3\text{NO}_5\text{Na}$   $[\text{M}+\text{Na}]^+$ : 622.1812, Found: 622.1804.

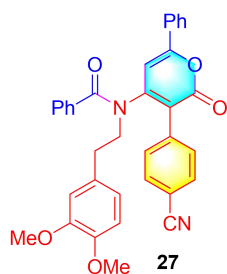

The reaction was run at 80 °C for 5 h, affording product **27** as a pale yellow solid (51.7 mg, 93% yield, m.p. = 172-173 °C);  $^1\text{H}$  NMR (400 MHz,  $\text{CDCl}_3$ ):  $\delta$  3.08 (brm, 2H), 3.72 (brm, 1H), 3.76 (s, 3H), 3.88 (s, 3H), 4.10 (brm, 1H), 5.80 (s, 1H), 6.74 (d,  $J$  = 1.2 Hz, 1H), 6.82 (dd,  $J$  = 8.0, 1.2 Hz, 1H), 6.92 (d,  $J$  = 8.4 Hz, 1H), 6.95-6.98 (m, 4H), 7.18 (t,  $J$  = 8.0 Hz, 2H), 7.38 (tt,  $J$  = 7.6, 1.6 Hz, 1H), 7.44-7.50 (m, 3H), 7.54-7.58 (m, 4H);  $^{13}\text{C}$  NMR (100 MHz,  $\text{CDCl}_3$ ):  $\delta$  169.28, 161.42, 160.10, 154.84, 149.48, 148.24, 136.33, 133.96, 131.86, 131.72, 131.62, 130.79, 130.11, 128.98, 128.06, 128.05, 125.65, 121.33, 118.60, 118.45, 112.47, 111.75, 111.46, 101.59, 55.89, 55.81, 53.72, 33.00.  $^{19}\text{F}$  NMR (376 MHz,  $\text{CDCl}_3$ )  $\delta$  -62.82; IR (ATR): 2247, 1715, 1662, 1633, 1534, 1501, 1397, 1345, 1218, 1133, 1044, 985, 857, 678, 596. HRMS (ESI): Exact mass calcd for  $\text{C}_{35}\text{H}_{28}\text{N}_2\text{O}_5\text{Na}$   $[\text{M}+\text{Na}]^+$ : 579.1890, Found: 579.1882.

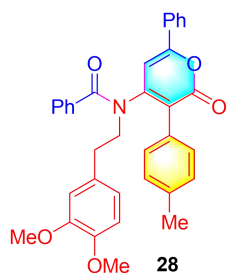

The reaction was run at 80 °C for 5 h, affording product **28** as a pale yellow solid (46.9 mg, 86% yield, m.p. = 121-122 °C);  $^1\text{H}$  NMR (500 MHz,  $\text{CDCl}_3$ ):  $\delta$  2.38 (s, 3H), 3.00 (brm, 2H), 3.42 (brm, 1H), 3.78 (s, 3H), 3.86 (s, 3H), 4.33 (brm, 1H), 5.76 (s, 1H), 6.71 (s, 1H), 6.79 (d,  $J$  = 7.5 Hz, 1H), 6.86-6.90 (m, 3H), 7.08 (d,  $J$  = 7.5 Hz, 2H), 7.14 (d,  $J$  = 7.5 Hz, 2H), 7.20 (t,  $J$  = 7.5 Hz, 2H), 7.36 (t,  $J$  = 7.5 Hz, 1H), 7.42-7.47 (m, 3H), 7.54-7.55 (m, 2H);  $^{13}\text{C}$  NMR (125 MHz,  $\text{CDCl}_3$ ):  $\delta$  169.89, 162.47, 158.30, 153.26, 149.29, 148.05, 138.51, 134.73, 131.75, 131.17, 131.01, 130.57, 129.70, 129.10, 128.85, 128.32, 128.09, 127.89, 125.45, 121.31, 120.93, 112.43, 111.31, 102.70, 55.85, 55.82, 53.02, 33.21, 21.36. IR (ATR): 1717, 1663, 1631, 1538, 1498, 1432, 1378, 1294, 1165, 1136, 1047, 834, 734, 675, 568. HRMS (ESI): Exact mass calcd for  $\text{C}_{35}\text{H}_{31}\text{NO}_5\text{Na}$   $[\text{M}+\text{Na}]^+$ : 568.2094, Found: 568.2096.

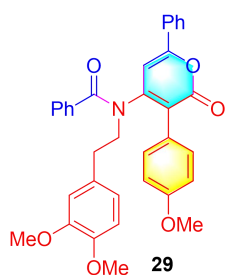

The reaction was run at 80 °C for 5 h, affording product **29** as a pale yellow solid (47.1 mg, 84% yield, m.p. = 151-152 °C);  $^1\text{H}$  NMR (400 MHz,  $\text{CDCl}_3$ ):  $\delta$  3.00 (brm, 2H), 3.46 (brm, 1H), 3.78 (s, 3H), 3.84 (s, 3H), 3.86 (s, 3H), 4.35 (brm, 1H), 5.76 (s, 1H), 6.72 (s, 1H), 6.80 (d,  $J$  = 8.0 Hz, 1H), 6.84-6.89 (m, 3H), 6.93 (d,  $J$  = 8.0 Hz, 2H), 7.09 (d,  $J$  = 7.2 Hz, 2H), 7.20 (t,  $J$  = 8.0 Hz, 2H), 7.36 (tt,  $J$  = 7.2, 1.6 Hz, 1H), 7.42-7.46 (m, 3H), 7.53-7.55 (m, 2H);  $^{13}\text{C}$  NMR (100 MHz,  $\text{CDCl}_3$ ):  $\delta$  169.90, 162.56, 159.64, 158.11, 152.97, 149.29,



148.05, 134.69, 131.73, 131.17, 130.96, 130.56, 129.44, 128.84, 128.00, 127.87, 125.41, 123.47, 121.30, 120.60, 113.87, 112.43, 111.31, 102.61, 55.84, 55.80, 55.27, 52.97, 33.17; IR (ATR): 1709, 1670, 1626, 1542, 1507, 1449, 1394, 1253, 1174, 1141, 1084, 1028, 905, 829, 772, 721, 693, 640, 562. HRMS (ESI): Exact mass calcd for C<sub>35</sub>H<sub>31</sub>NO<sub>6</sub>Na [M+Na]<sup>+</sup>: 584.2044, Found: 584.2036.

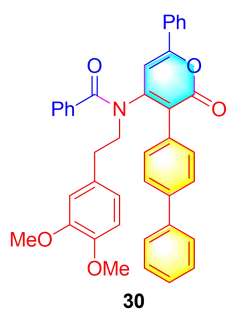

The reaction was run at 80 °C for 5 h, affording product **30** as a pale yellow solid (55.2 mg, 91% yield, m.p. = 166-167 °C); <sup>1</sup>H NMR (400 MHz, CDCl<sub>3</sub>): δ 3.06 (brm, 2H), 3.56 (brm, 1H), 3.78 (s, 3H), 3.87 (s, 3H), 4.40 (brm, 1H), 5.80 (s, 1H), 6.74 (s, 1H), 6.82 (d, *J* = 8.0 Hz, 1H), 6.89 (d, *J* = 8.0 Hz, 1H), 7.04-7.08 (m, 4H), 7.19 (t, *J* = 8.0 Hz, 2H), 7.34-7.41 (m, 2H), 7.43-7.50 (m, 5H), 7.54-7.58 (m, 4H), 7.63-7.65 (m, 2H); <sup>13</sup>C NMR (100 MHz, CDCl<sub>3</sub>): δ 169.79, 162.36, 158.67, 153.63, 149.33, 148.08,

141.12, 140.35, 134.55, 131.75, 131.27, 131.14, 130.48, 130.28, 128.89, 128.82, 128.05, 127.92, 127.59, 127.06, 126.99, 125.50, 121.33, 120.38, 112.43, 111.33, 102.44, 102.44, 55.85, 55.81, 53.30, 33.15; IR (ATR): 1716, 1657, 1627, 1546, 1515, 1447, 1390, 1319, 1246, 1158, 1026, 910, 837, 810, 764, 721, 689, 645, 625, 574. HRMS (ESI): Exact mass calcd for C<sub>40</sub>H<sub>33</sub>NO<sub>5</sub>Na [M+Na]<sup>+</sup>: 630.2251, Found: 630.2256.

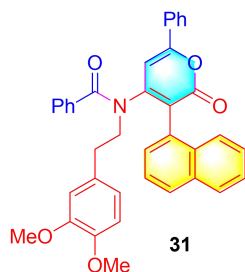

The reaction was run at 80 °C for 10 h, affording product **31** as a pale yellow solid (47.1 mg, 81% yield, m.p. = 180-181 °C); <sup>1</sup>H NMR (500 MHz, CDCl<sub>3</sub>): δ 2.83-2.85 (brm, 2H), 3.57 (brm, 1H), 3.72 (s, 3H), 3.87 (s, 4H), 5.96 (s, 1H), 6.56 (s, 1H), 6.64 (s, 1H), 6.84-7.04 (m, 6H), 7.16-7.25 (m, 3H), 7.39-7.43 (m, 1H), 7.46-7.50 (m, 4H), 7.64-7.65 (m, 2H), 7.83 (d, *J* = 8.0 Hz, 1H), 7.89 (d, *J* = 8.0 Hz, 1H); <sup>13</sup>C NMR (125 MHz, CDCl<sub>3</sub>): δ 169.76, 162.02, 159.27, 155.82, 149.22, 148.00, 134.77, 133.58, 131.48, 131.30,

131.20, 130.60, 129.64, 129.22, 128.92, 128.43, 128.12, 127.89, 126.45, 125.79, 125.61, 125.20, 124.61, 121.20, 112.40, 111.29, 102.77, 55.88, 55.80, 33.22. IR (ATR): 1719, 1664, 1629, 1547, 1535, 1441, 1378, 1310, 1268, 1048, 975, 878, 805, 747, 587. HRMS (ESI): Exact mass calcd for C<sub>38</sub>H<sub>31</sub>NO<sub>5</sub>Na [M+Na]<sup>+</sup>: 604.2094, Found: 604.2092.

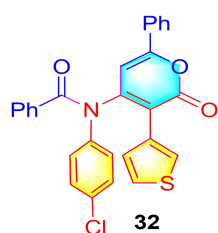

The reaction was run at 80 °C for 8 h, affording product **32** as a pale yellow solid (41.1 mg, 85% yield, m.p. = 117-118 °C); <sup>1</sup>H NMR (500 MHz, CDCl<sub>3</sub>): δ 6.57 (s, 1H), 7.02 (d, *J* = 5.0 Hz, 1H), 7.11 (brm, 2H), 7.20-7.24 (m, 5H), 7.30 (d, *J* = 7.5 Hz, 2H), 7.35-7.38 (m, 2H), 7.44-7.49 (m, 3H), 7.78-7.79 (m, 2H); <sup>13</sup>C NMR (125 MHz, CDCl<sub>3</sub>): δ 169.81, 161.90, 158.79,

139.50, 133.92, 132.69, 131.58, 131.23, 130.79, 130.52, 129.59, 128.99, 128.30, 128.15, 128.01, 127.37, 126.81, 125.60, 125.26, 117.94, 102.69; IR (ATR): 1726, 1673, 1628, 1556, 1488, 1447, 1287, 1089, 1012, 851, 791, 764, 689, 675, 652, 635, 605, 575, 515. HRMS (ESI): Exact mass calcd for C<sub>28</sub>H<sub>18</sub>ClNO<sub>3</sub>SNa [M+Na]<sup>+</sup>: 506.0588, Found: 506.0581.

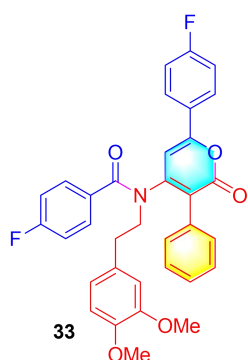

The reaction was run at 80 °C for 5 h, affording product **33** as a pale yellow solid (53.9 mg, 95% yield, m.p. = 221-222 °C); <sup>1</sup>H NMR (400 MHz, CDCl<sub>3</sub>): δ 3.04 (brm, 2H), 3.55 (brm, 1H), 3.78 (s, 3H), 3.89 (s, 3H), 4.34 (brm, 1H), 5.62 (s, 1H), 6.74 (s, 1H), 6.80 (dd, *J* = 8.0, 1.6 Hz, 1H), 6.84-6.92 (m, 5H), 6.96-7.01 (m, 2H), 7.12-7.17 (m, 2H), 7.28-7.35 (m, 3H), 7.52-7.57 (m, 2H); <sup>13</sup>C NMR (100 MHz, CDCl<sub>3</sub>): δ 168.55, 164.41 (d, *J* = 252 Hz), 164.28 (d, *J* = 252 Hz), 161.95, 158.02 (d, *J* = 1.3 Hz), 153.52, 149.46, 148.20, 131.97, 131.11, 130.70 (d, *J* = 3.4 Hz), 130.38 (d, *J* = 9.2 Hz), 129.84, 128.56, 128.39, 127.74, 127.66, 126.69 (d, *J* = 3.2 Hz), 121.43, 120.70, 116.15 (d, *J* = 22.2 Hz), 114.99 (d, *J* = 21.9 Hz), 112.50, 111.40, 101.59, 55.93, 55.86, 53.65, 33.05; <sup>19</sup>F NMR (376 MHz, CDCl<sub>3</sub>) δ -107.22, -107.65. IR (ATR): 1714, 1662, 1617, 1543, 1476, 1434, 1276, 1077, 1021, 869, 758, 676, 664, 648, 582. HRMS (ESI): Exact mass calcd for C<sub>34</sub>H<sub>27</sub>F<sub>2</sub>NO<sub>5</sub>Na [M+Na]<sup>+</sup>: 590.1750, Found: 590.1751.

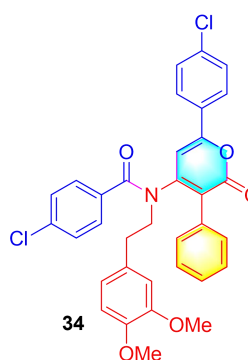

The reaction was run at 80 °C for 5 h, affording product **34** as a pale yellow solid (55.1 mg, 92% yield, m.p. = 215-216 °C); <sup>1</sup>H NMR (400 MHz, CDCl<sub>3</sub>): δ 2.98 (brm, 2H), 3.43 (brm, 1H), 3.79 (s, 3H), 3.89 (s, 3H), 4.41 (brm, 1H), 5.65 (s, 1H), 6.74 (s, 1H), 6.78 (d, *J* = 8.0 Hz, 1H), 6.89-6.93 (m, 5H), 7.15 (d, *J* = 8.4 Hz, 2H), 7.29-7.36 (m, 3H), 7.43 (d, *J* = 8.8 Hz, 2H), 7.48 (d, *J* = 8.8 Hz, 2H); <sup>13</sup>C NMR (100 MHz, CDCl<sub>3</sub>): δ 168.58, 161.80, 157.83, 153.21, 149.47, 148.22, 137.48, 137.42, 132.89, 131.86, 130.96, 129.87, 129.37, 129.22, 128.82, 128.65, 128.42, 128.12, 126.70, 121.44, 121.22, 112.43, 111.40, 102.02, 55.95, 55.88, 53.64, 33.02; IR (ATR): 1717, 1665, 1627, 1545, 1511, 1490, 1440, 1391, 1264, 1153, 1086, 1011, 904, 819, 787, 753, 698, 637, 575. HRMS (ESI): Exact mass calcd for C<sub>34</sub>H<sub>27</sub>Cl<sub>2</sub>NO<sub>5</sub>Na [M+Na]<sup>+</sup>: 622.1158, Found: 622.1169.

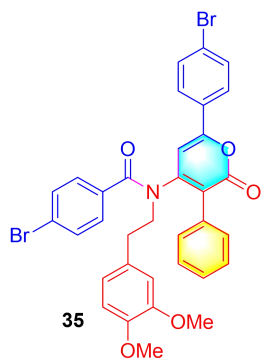

The reaction was run at 80 °C for 5 h, affording product **35** as a pale yellow solid (63.9 mg, 93% yield, m.p. = 205-206 °C);  $^1\text{H}$  NMR (400 MHz,  $\text{CDCl}_3$ ):  $\delta$  2.94 (brm, 2H), 3.41 (brm, 1H), 3.79 (s, 3H), 3.89 (s, 3H), 4.42 (brm, 1H), 5.65 (s, 1H), 6.74-6.78 (m, 2H), 6.82 (d,  $J = 8.4$  Hz, 2H), 6.88-6.92 (m, 3H), 7.29-7.34 (m, 5H), 7.40 (d,  $J = 8.4$  Hz, 2H), 7.59 (d,  $J = 8.8$  Hz, 2H);  $^{13}\text{C}$  NMR (100 MHz,  $\text{CDCl}_3$ ):  $\delta$  168.68, 161.77, 157.89, 153.16, 149.47, 148.22, 133.33, 132.19, 131.83, 131.09, 130.94, 129.86, 129.51, 129.25, 128.67, 128.42, 126.84, 125.91, 125.85, 121.44, 121.33, 112.40, 111.39, 102.03, 55.94, 55.88, 53.62, 33.01; IR (ATR): 1713, 1663, 1627, 1586, 1544, 1510, 1486, 1441, 1389, 1270, 1151, 1068, 1008, 903, 817, 786, 750, 699, 636, 573. HRMS (ESI): Exact mass calcd for  $\text{C}_{34}\text{H}_{27}\text{Br}_2\text{NO}_5\text{Na}$   $[\text{M}+\text{Na}]^+$ : 710.0148, Found: 710.0152.

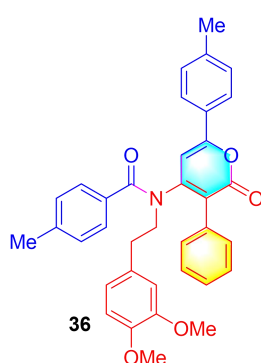

The reaction was run at 80 °C for 5 h, affording product **36** as a pale yellow solid (50.8 mg, 91% yield, m.p. = 190-191 °C);  $^1\text{H}$  NMR (400 MHz,  $\text{CDCl}_3$ ):  $\delta$  2.25 (s, 3H), 2.35 (s, 3H), 2.94 (brm, 2H), 3.45 (brm, 1H), 3.73 (s, 3H), 3.81 (s, 3H), 4.12 (brm, 1H), 5.67 (s, 1H), 6.67 (s, 1H), 6.72 (d,  $J = 8.0$  Hz, 1H), 6.81 (d,  $J = 8.0$  Hz, 1H), 6.89-6.94 (m, 6H), 7.19 (d,  $J = 8.0$  Hz, 2H), 7.23-7.27 (m, 3H), 7.39 (d,  $J = 8.0$  Hz, 2H);  $^{13}\text{C}$  NMR (100 MHz,  $\text{CDCl}_3$ ):  $\delta$  169.80, 162.50, 158.83, 154.02, 149.26, 148.00, 141.66, 131.85, 131.46, 129.91, 129.56, 128.48, 128.33, 128.26, 128.20, 127.79, 125.41, 121.33, 120.24, 112.40, 111.29, 101.90, 55.85, 55.79, 53.13, 33.15, 21.44, 21.42. IR (ATR): 1716, 1658, 1612, 1538, 1524, 1487, 1455, 1378, 1257, 1158, 1052, 948, 779, 567. HRMS (ESI): Exact mass calcd for  $\text{C}_{36}\text{H}_{33}\text{NO}_5\text{Na}$   $[\text{M}+\text{Na}]^+$ : 582.2251, Found: 582.2240.

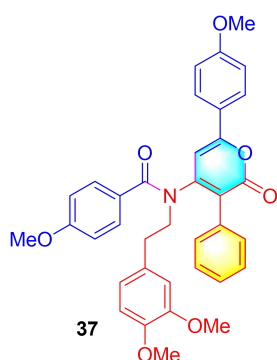

The reaction was run at 80 °C for 8 h, affording product **37** as a pale yellow solid (54.4 mg, 92% yield, m.p. = 136-137 °C);  $^1\text{H}$  NMR (400 MHz,  $\text{CDCl}_3$ ):  $\delta$  3.01 (brm, 2H), 3.60 (brm, 2H), 3.77 (s, 3H), 3.78 (s, 3H), 3.87 (s, 3H), 3.88 (s, 3H), 5.64 (s, 1H), 6.65-6.69 (m, 2H), 6.72-6.73 (m, 1H), 6.80 (dd,  $J = 8.0, 1.6$  Hz, 1H), 6.87-6.90 (m, 1H), 6.92-6.95 (m, 4H), 7.00-7.04 (m, 2H), 7.28-7.30 (m, 3H), 7.49-7.52 (m, 2H);  $^{13}\text{C}$  NMR (100 MHz,  $\text{CDCl}_3$ ):  $\delta$  169.27, 162.57, 161.96, 161.89, 158.86, 154.45, 149.25, 147.98, 132.06, 131.59, 130.17, 129.88, 128.97, 128.23, 128.19, 127.24, 126.96, 123.08, 121.31, 119.33, 114.24, 113.06, 112.52, 111.30, 100.84, 55.86, 55.81,

55.47, 55.29, 53.27, 33.13; IR (ATR): 1700, 1656, 1605, 1539, 1509, 1442, 1390, 1321, 1241, 1184, 1023, 853, 824, 782, 744, 698, 639, 612, 563. HRMS (ESI): Exact mass calcd for  $C_{36}H_{33}NO_7Na$   $[M+Na]^+$ : 614.2149, Found: 614.2155.

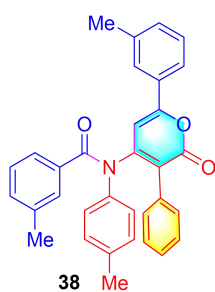

The reaction was run at 80 °C for 5 h, affording product **38** as a pale green solid (44.6 mg, 92% yield, m.p. = 196-197 °C);  $^1H$  NMR (500 MHz,  $CDCl_3$ ):  $\delta$  2.21 (s, 3H), 2.29 (s, 3H), 2.40 (s, 3H), 6.60 (s, 1H), 6.86 (s, 2H), 6.96-7.03 (m, 5H), 7.12 (d,  $J = 7.5$  Hz, 1H), 7.21-7.25 (m, 5H), 7.27 (brs, 1H), 7.32 (t,  $J = 7.5$  Hz, 1H), 7.57 (d,  $J = 8.0$  Hz, 1H), 7.64 (s, 1H);  $^{13}C$  NMR (125 MHz,  $CDCl_3$ ):  $\delta$  170.14, 162.89, 159.13, 153.17, 138.84, 138.74, 137.85, 136.75, 134.28, 131.94, 131.88, 131.77, 130.82, 129.79, 129.52, 128.73, 128.24, 128.16, 127.42, 126.35, 126.23, 125.66, 122.78, 121.87, 103.09, 21.36, 21.17, 20.97; IR (ATR): 1708, 1662, 1627, 1548, 1509, 1432, 1345, 1297, 909, 782, 726, 693, 566. HRMS (ESI): Exact mass calcd for  $C_{33}H_{27}NO_3Na$   $[M+Na]^+$ : 508.1883, Found: 508.1889.

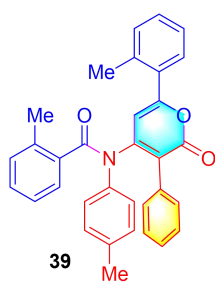

The reaction was run at 80 °C for 5 h, affording product **39** as a pale green solid (41.2 mg, 85% yield, m.p. = 181-182 °C);  $^1H$  NMR (500 MHz,  $CDCl_3$ ):  $\delta$  2.19 (s, 3H), 2.25 (s, 3H), 2.51 (s, 3H), 6.45 (s, 1H), 6.59 (s, 2H), 6.82-6.83 (m, 2H), 6.91-6.94 (m, 2H), 7.05 (d,  $J = 7.5$  Hz, 1H), 7.14 (t,  $J = 7.5$  Hz, 1H), 7.27-7.32 (m, 7H), 7.36 (tt,  $J = 7.5, 1.0$  Hz, 1H), 7.54 (d,  $J = 7.5$  Hz, 1H);  $^{13}C$  NMR (125 MHz,  $CDCl_3$ ):  $\delta$  170.32, 163.22, 160.56, 152.64, 138.17, 136.78, 136.73, 134.35, 132.11, 131.65, 131.32, 130.72, 130.42, 129.83, 129.56, 129.37, 129.11, 128.48, 128.25, 127.85, 126.33, 126.08, 124.97, 122.37, 107.77, 20.90, 19.65. IR (ATR): 1714, 1657, 1632, 1541, 1498, 1447, 1355, 1278, 935, 774, 712, 678, 558. HRMS (ESI): Exact mass calcd for  $C_{33}H_{27}NO_3Na$   $[M+Na]^+$ : 508.1883, Found: 508.1879.

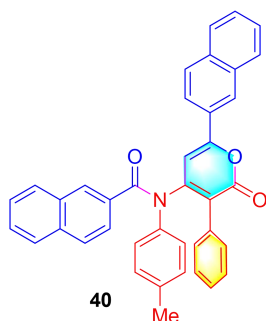

The reaction was run at 80 °C for 8 h, affording product **40** as a pale yellow solid (47.9 mg, 86% yield, m.p. = 171-172 °C);  $^1H$  NMR (400 MHz,  $CDCl_3$ ):  $\delta$  2.28 (s, 3H), 6.84 (s, 1H), 6.93-7.02 (m, 4H), 7.24-7.28 (m, 6H), 7.45-7.61 (m, 5H), 7.71-7.78 (m, 3H), 7.85-7.89 (m, 3H), 7.93-7.95 (m, 1H), 8.46 (s, 1H);  $^{13}C$  NMR (100 MHz,  $CDCl_3$ ):  $\delta$  169.93, 162.89, 158.94, 153.22, 138.75, 136.88, 134.23, 132.92, 132.13, 131.93, 131.65, 130.37, 129.91, 129.47, 128.98, 128.88, 128.66, 128.36, 128.24, 127.84, 127.73, 127.68, 127.58, 127.36, 126.97, 126.53, 126.40, 126.20, 124.83, 122.17, 121.90, 103.46, 20.95; IR (ATR): 1697, 1655, 1624, 1509, 1432, 1350, 1270, 1193, 1125, 947,

905, 867, 817, 735, 700, 563. HRMS (ESI): Exact mass calcd for C<sub>39</sub>H<sub>27</sub>NO<sub>3</sub>Na [M+Na]<sup>+</sup>: 580.1883, Found: 580.1895.

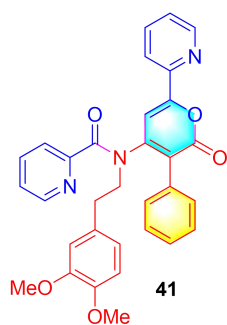

The reaction was run at 80 °C for 8 h, affording product **41** as a pale yellow solid (33.0 mg, 62% yield, m.p. = 151-152 °C); <sup>1</sup>H NMR (400 MHz, CDCl<sub>3</sub>): δ 2.96 (brm, 2H), 3.39 (brm, 1H), 3.76 (s, 3H), 3.83 (s, 3H), 4.11 (brm, 1H), 6.66-6.75 (m, 3H), 6.93 (s, 1H), 7.28-7.34 (m, 5H), 7.37-7.42 (m, 2H), 7.59-7.61 (m, 1H), 7.70 (td, *J* = 7.6, 1.6 Hz, 1H), 7.77-7.81 (m, 1H), 7.96 (d, *J* = 8.0 Hz, 1H), 8.39 (d, *J* = 4.0 Hz, 1H), 8.57-8.59 (m, 1H); <sup>13</sup>C NMR (100 MHz, CDCl<sub>3</sub>): δ 167.66, 162.65, 156.01, 149.69,

148.93, 148.39, 147.69, 147.55, 136.99, 136.83, 132.06, 130.79, 129.61, 129.00, 128.54, 128.50, 128.26, 128.21, 125.71, 124.81, 124.70, 120.94, 120.32, 111.99, 111.16, 105.87, 55.74, 51.53, 33.79; IR (ATR): 1737, 1655, 1622, 1560, 1515, 1441, 1236, 1156, 1025, 810, 746, 696, 618. HRMS (ESI): Exact mass calcd for C<sub>32</sub>H<sub>27</sub>N<sub>3</sub>O<sub>5</sub>Na [M+Na]<sup>+</sup>: 556.1843, Found: 556.1846.

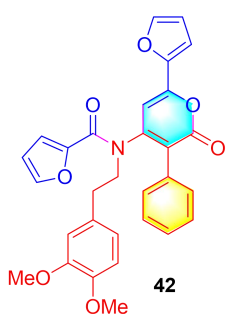

The reaction was run at 80 °C for 8 h, affording product **42** as a pale yellow solid (44.4 mg, 87% yield, m.p. = 142-143 °C); <sup>1</sup>H NMR (400 MHz, CDCl<sub>3</sub>): δ 2.83 (brm, 2H), 3.64 (brm, 1H), 3.78 (s, 3H), 3.80 (s, 3H), 3.88 (brm, 1H), 5.88 (s, 1H), 6.43 (dd, *J* = 3.6, 1.6 Hz, 1H), 6.53 (dd, *J* = 3.6, 1.6 Hz, 1H), 6.64-6.67 (m, 2H), 6.74 (d, *J* = 8.0 Hz, 1H), 6.94 (d, *J* = 3.6 Hz, 1H), 6.99 (d, *J* = 3.6 Hz, 1H), 7.24-7.25 (m, 1H), 7.26-7.27 (m, 1H), 7.32-7.37 (m, 3H), 7.41-7.42 (m, 1H), 7.49-7.50 (m, 1H); <sup>13</sup>C NMR (100 MHz, CDCl<sub>3</sub>):

δ 161.94, 158.86, 153.35, 150.17, 149.01, 147.85, 147.17, 145.82, 144.99, 144.96, 131.56, 130.75, 129.32, 128.70, 128.54, 120.97, 119.74, 117.66, 112.52, 112.20, 112.03, 111.91, 111.14, 101.72, 55.74, 55.72, 51.33, 33.56; IR (ATR): 1711, 1672, 1636, 1515, 1466, 1388, 1261, 1155, 1016, 884, 749, 698, 592. HRMS (ESI): Exact mass calcd for C<sub>30</sub>H<sub>25</sub>NO<sub>7</sub>Na [M+Na]<sup>+</sup>: 534.1523, Found: 534.1522.

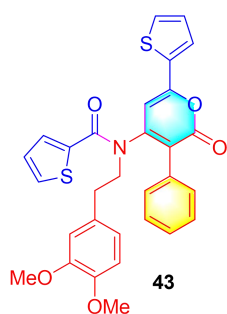

The reaction was run at 80 °C for 8 h, affording product **43** as a pale yellow solid (48.9 mg, 90% yield, m.p. = 165-166 °C); <sup>1</sup>H NMR (400 MHz, CDCl<sub>3</sub>): δ 2.92 (brm, 2H), 3.70 (brm, 2H), 3.78 (s, 3H), 3.81 (s, 3H), 5.64 (s, 1H), 6.67 (d, *J* = 1.6 Hz, 1H), 6.72 (dd, *J* = 8.0, 1.6 Hz, 1H), 6.80 (d, *J* = 8.0 Hz, 1H), 6.94 (dd, *J* = 4.8, 3.6 Hz, 1H), 7.09 (dd, *J* = 4.8, 3.6 Hz, 1H), 7.13-7.17 (m, 2H), 7.25-7.26 (m, 1H), 7.32-7.35 (m, 3H), 7.42 (dd, *J* = 4.0, 1.2 Hz, 1H), 7.43 (dd, *J* = 4.8, 1.2 Hz, 1H), 7.46 (dd, *J* = 4.8, 1.2 Hz, 1H); <sup>13</sup>C

NMR (100 MHz, CDCl<sub>3</sub>):  $\delta$  162.46, 161.76, 154.39, 153.51, 149.03, 147.78, 137.43, 134.30, 131.34, 131.33, 131.30, 131.22, 129.51, 129.39, 128.62, 128.54, 128.34, 127.76, 127.13, 121.13, 120.60, 112.25, 111.25, 102.15, 55.75, 55.72, 52.66, 33.16; IR (ATR): 1707, 1647, 1614, 1535, 1440, 1419, 1392, 1301, 1262, 1234, 1158, 1026, 856, 809, 786, 731, 695, 636, 569. HRMS (ESI): Exact mass calcd for C<sub>30</sub>H<sub>25</sub>NO<sub>5</sub>S<sub>2</sub>Na [M+Na]<sup>+</sup>: 566.1066, Found: 566.1068.

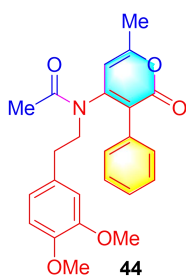

The reaction was run at 80 °C for 8 h, affording product **44** as a pale yellow solid (20.4 mg, 50% yield, m.p. = 132-133 °C); <sup>1</sup>H NMR (400 MHz, CDCl<sub>3</sub>):  $\delta$  2.03 (s, 3H), 2.21 (s, 3H), 2.65 (brm, 1H), 2.79 (brm, 2H), 3.83 (s, 3H), 3.84 (s, 3H), 3.91 (brm, 1H), 5.41 (s, 1H), 6.61 (d, *J* = 8.8 Hz, 2H), 6.76 (d, *J* = 8.0 Hz, 1H), 7.26-7.29 (m, 2H), 7.33-7.42 (m, 3H); <sup>13</sup>C NMR (100 MHz, CDCl<sub>3</sub>):  $\delta$  168.94, 163.26, 160.76, 152.74, 148.95, 147.79, 131.38, 130.87,

129.06, 128.82, 128.72, 120.82, 111.97, 111.12, 106.26, 55.85, 50.07, 33.59, 22.95, 19.74; IR (ATR): 1713, 1665, 1634, 1561, 1515, 1440, 1345, 1237, 1140, 1027, 944, 853, 792, 750, 699, 657, 569. HRMS (ESI): Exact mass calcd for C<sub>24</sub>H<sub>25</sub>NO<sub>5</sub>Na [M+Na]<sup>+</sup>: 430.1625, Found: 430.1633.

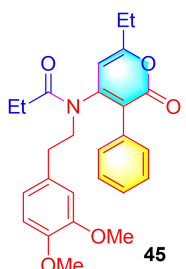

The reaction was run at 80 °C for 8 h, affording product **45** as a pale yellow solid (34.8 mg, 80% yield, m.p. = 108-109 °C); <sup>1</sup>H NMR (400 MHz, CDCl<sub>3</sub>):  $\delta$  1.11 (t, *J* = 7.2 Hz, 3H), 1.19 (t, *J* = 7.2 Hz, 3H), 2.26 (q, *J* = 8.4 Hz, 2H), 2.48 (q, *J* = 7.6 Hz, 2H), 2.63-2.80 (brm, 3H), 3.74-3.90 (brm, 1H), 3.82 (s, 3H), 3.83 (s, 3H), 5.39 (s, 1H), 6.59-6.62 (m, 2H), 6.75 (d, *J* = 8.0 Hz, 1H),

7.26-7.27 (m, 2H), 7.31-7.36 (m, 1H), 7.37-7.41 (m, 2H); <sup>13</sup>C NMR (100 MHz, CDCl<sub>3</sub>):  $\delta$  172.63, 165.47, 163.32, 152.85, 148.89, 147.71, 131.51, 130.87, 129.07, 128.72, 128.65, 120.95, 120.79, 111.92, 111.08, 104.74, 55.80, 50.20, 33.68, 28.04, 26.67, 10.65, 9.35. IR (ATR): 1718, 1657, 1623, 1547, 1502, 1477, 1332, 1245, 1135, 1011, 924, 878, 765, 744, 686, 645. HRMS (ESI): Exact mass calcd for C<sub>26</sub>H<sub>29</sub>NO<sub>5</sub>Na [M+Na]<sup>+</sup>: 458.1938, Found: 458.1939.

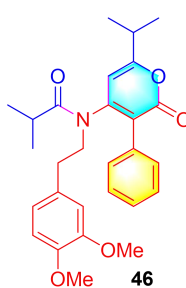

The reaction was run at 80 °C for 10 h, affording product **46** as a pale-green solid (38.4 mg, 83% yield, m.p. = 92-93 °C); <sup>1</sup>H NMR (400 MHz, CDCl<sub>3</sub>):  $\delta$  0.95 (brs, 3H), 1.09 (brs, 3H), 1.19 (d, *J* = 6.8 Hz, 6H), 2.58-2.72 (m, 3H), 2.89 (brm, 2H), 3.83 (s, 3H), 3.84 (s, 3H), 3.91 (brm, 1H), 5.33 (s, 1H), 6.62 (d, *J* = 7.2 Hz, 2H), 6.76 (d, *J* = 8.0 Hz, 1H), 7.26-7.28 (m, 2H), 7.31-7.35 (m, 1H), 7.37-7.41 (m, 2H); <sup>13</sup>C NMR (100 MHz, CDCl<sub>3</sub>):  $\delta$  176.69, 169.12,

163.34, 153.18, 148.94, 147.75, 131.54, 129.32, 128.64, 120.91, 111.98, 111.10, 102.92,

55.80, 50.94, 33.50, 32.67, 32.42, 20.54, 20.00, 19.90, 19.75, 19.01. IR (ATR): 1714, 1664, 1617, 1532, 1499, 1466, 1387, 1236, 1175, 1023, 952, 886, 748, 741, 687. HRMS (ESI): Exact mass calcd for C<sub>28</sub>H<sub>33</sub>NO<sub>5</sub>Na [M+Na]<sup>+</sup>: 486.2251, Found: 486.2258.

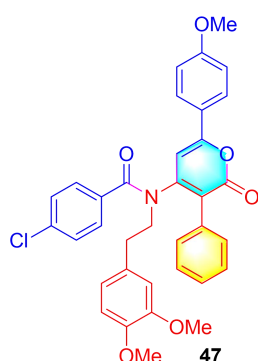

The reaction was run at 80 °C for 6 h, affording the product as a separable mixture of two regioisomers (1.6:1.0 ratio) (pale yellow solid, 29.8 mg, 50% yield of the major regioisomer **47**, m.p. = 152-153 °C); NMR data of the major regioisomer **47** was listed below: <sup>1</sup>H NMR (400 MHz, CDCl<sub>3</sub>): δ 3.02 (brm, 2H), 3.78 (s, 3H), 3.79 (s, 3H), 3.87 (brm, 5H), 5.67 (s, 1H), 6.67-6.70 (m, 2H), 6.72-6.73 (m, 1H), 6.79 (dd, *J* = 8.0, 2.0 Hz, 1H), 6.88 (d, *J* = 8.0 Hz, 1H), 6.95-6.97 (m, 2H), 7.00-7.04 (m, 2H), 7.28-7.35 (m, 3H), 7.41-7.43 (m, 2H), 7.46-7.48 (m, 2H); <sup>13</sup>C NMR (100 MHz, CDCl<sub>3</sub>): δ 169.27, 162.16, 162.01, 157.44, 153.98, 149.37, 148.09, 137.25, 132.09, 131.30, 130.17, 129.84, 129.18, 129.02, 128.49, 128.34, 126.83, 126.70, 121.42, 120.73, 113.16, 112.55, 111.35, 102.60, 55.94, 55.87, 55.35, 53.32, 33.15; IR (ATR): 1718, 1662, 1603, 1546, 1510, 1440, 1389, 1256, 1168, 1087, 1031, 904, 824, 774, 750, 698, 628, 609, 572. HRMS (ESI): Exact mass calcd for C<sub>35</sub>H<sub>30</sub>NO<sub>6</sub>ClNa [M+Na]<sup>+</sup>: 618.1654, Found: 618.1648.

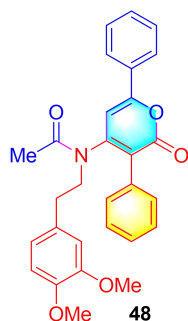

The reaction was run at 80 °C for 8 h, affording the product as a separable mixture of two regioisomers (1.3:1 ratio) (pale yellow solid, 16.9 mg, 36% yield of the major regioisomer **48**, m.p. = 45-46 °C); NMR data of the major regioisomer **48** was listed below: <sup>1</sup>H NMR (400 MHz, CDCl<sub>3</sub>): δ 2.13 (s, 3H), 2.93 (brm, 2H), 3.79 (brm, 5H), 3.89 (s, 3H), 5.27 (s, 1H), 6.63 (s, 1H), 6.73 (d, *J* = 8.0 Hz, 1H), 6.85 (d, *J* = 8.0 Hz, 1H), 6.96-6.97 (m, 2H), 7.04 (d, *J* = 7.6 Hz, 2H), 7.20 (d, *J* = 7.6 Hz, 2H), 7.28-7.31 (m, 3H), 7.37 (t, *J* = 7.2, 1H); <sup>13</sup>C NMR (100 MHz, CDCl<sub>3</sub>): δ 169.78, 163.12, 160.53, 153.17, 149.12, 147.96, 134.60, 131.35, 131.27, 131.13, 129.74, 128.38, 127.94, 127.90, 121.04, 119.80, 112.40, 111.28, 104.96, 55.99, 55.83, 52.55, 33.50, 19.88; IR (ATR): 1717, 1639, 1612, 1559, 1514, 1440, 1261, 1142, 1026, 935, 789, 696, 568. HRMS (ESI): Exact mass calcd for C<sub>29</sub>H<sub>27</sub>NO<sub>5</sub>Na [M+Na]<sup>+</sup>: 492.1781, Found: 492.1784.



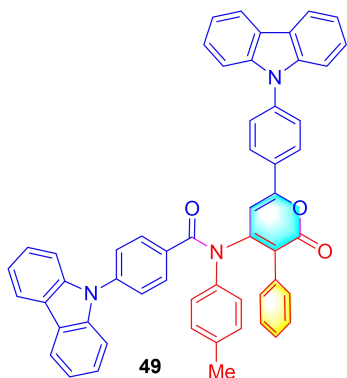

The reaction was run at 80 °C for 12 h, affording product **49** as a yellow solid (63.7 mg, 81% yield, m.p. = 215-216 °C); <sup>1</sup>H NMR (400 MHz, CDCl<sub>3</sub>): δ 2.37 (s, 3H), 6.77 (s, 1H), 7.02 (brm, 2H), 7.13-7.15 (m, 2H), 7.29-7.37 (m, 11H), 7.40-7.49 (m, 10H), 7.70 (d, *J* = 8.0 Hz, 2H), 8.07 (d, *J* = 8.0 Hz, 2H), 8.14 (t, *J* = 8.0 Hz, 4H); <sup>13</sup>C NMR (100 MHz, CDCl<sub>3</sub>): δ 169.02, 162.55, 158.25, 152.75, 140.40, 140.23, 140.19, 140.10, 138.63, 137.38, 132.68, 131.78, 130.55, 130.14, 129.47, 129.30, 128.61, 128.45, 127.25, 126.97, 126.51, 126.16, 126.11, 125.95, 123.70, 123.66, 120.49, 120.44, 120.42, 109.65, 109.53, 103.13, 21.07; IR (ATR): 1718, 1670, 1599, 1509, 1448, 1336, 1225, 1170, 746, 722, 564. HRMS (ESI): Exact mass calcd for C<sub>55</sub>H<sub>37</sub>N<sub>3</sub>O<sub>3</sub>Na [M+Na]<sup>+</sup>: 810.2727, Found: 810.2741.

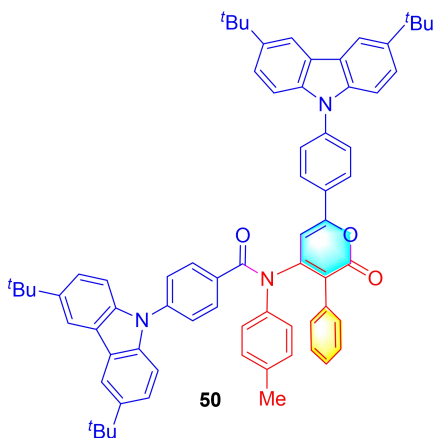

The reaction was run at 80 °C for 12 h, affording product **50** as a yellow solid (61.7 mg, 61% yield, m.p. = 234-235 °C); <sup>1</sup>H NMR (400 MHz, CDCl<sub>3</sub>): δ 1.50-1.51 (m, 36H), 2.40 (s, 3H), 6.81 (s, 1H), 7.06 (brm, 2H), 7.16-7.18 (m, 2H), 7.34-7.38 (m, 7H), 7.44-7.53 (m, 10H), 7.73 (d, *J* = 8.4 Hz, 2H), 8.09 (d, *J* = 8.0 Hz, 2H), 8.18 (d, *J* = 8.8 Hz, 4H); <sup>13</sup>C NMR (100 MHz, CDCl<sub>3</sub>): δ 169.11, 162.58, 158.35, 152.85, 143.49, 143.47, 140.93, 140.74, 138.68, 138.48, 138.42, 137.25, 132.09, 131.80, 130.47, 130.10, 129.47, 128.69, 128.52, 128.41, 127.18, 126.47, 126.38, 125.40, 123.79, 123.74, 123.68, 116.36, 116.31, 109.14, 109.05, 102.98, 34.72, 34.70, 31.92, 31.91, 21.05; IR (ATR): 1723, 1681, 1602, 1511, 1471, 1363, 1293, 1177, 809, 696, 610, 566. HRMS (ESI): Exact mass calcd for C<sub>71</sub>H<sub>69</sub>N<sub>3</sub>O<sub>3</sub>Na [M+Na]<sup>+</sup>: 1034.5231, Found: 1034.5233.

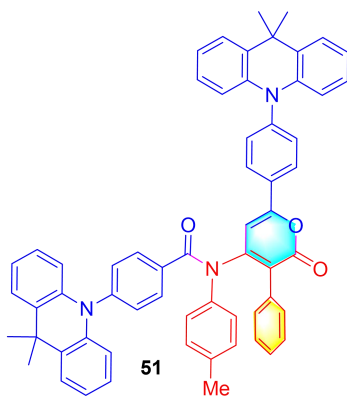

The reaction was run at 80 °C for 12 h, affording product **51** as a yellow solid (49.6 mg, 57% yield, m.p. = 131-132 °C); <sup>1</sup>H NMR (400 MHz, CDCl<sub>3</sub>): δ 1.66 (s, 6H), 1.70 (s, 6H), 2.35 (s, 3H), 6.15 (d, *J* = 7.6 Hz, 2H), 6.27 (d, *J* = 7.2 Hz, 2H), 6.78 (s, 1H), 6.96-7.01 (m, 10H), 7.10-7.12 (m, 2H), 7.18 (d, *J* = 8.0 Hz, 2H), 7.33-7.36 (m, 5H), 7.45-7.49 (m, 8H), 8.09 (d, *J* = 8.0 Hz, 2H); <sup>13</sup>C NMR (100 MHz, CDCl<sub>3</sub>): δ 169.29, 158.26, 143.96, 140.41, 140.27, 138.55, 137.46, 134.02, 131.80, 131.29, 130.76, 130.45, 130.33, 130.31, 130.02, 129.52, 128.67, 128.49, 128.22, 126.57, 126.40, 126.27, 125.37,





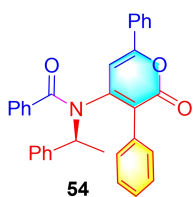

The reaction was run at 80 °C for 12 h, affording product **54** as a pale yellow solid (40.0 mg, 85% yield, m.p. = 145-146 °C); HPLC analysis (Chiralcel OD, *i*PrOH/hexane = 20/80, 1.0 mL/min, 230 nm; *t<sub>r</sub>* (major) = 13.91 min, *t<sub>r</sub>* (minor) = 17.38 min) gave the isomeric composition of the product: 99% ee,  $[\alpha]_D^{25} = -120.1$  (*c* = 1.0, CH<sub>2</sub>Cl<sub>2</sub>). <sup>1</sup>H NMR (400 MHz, CDCl<sub>3</sub>): δ 1.69 (brs, 3H), 6.39 (brm, 3H), 6.90-7.23 (brm, 5H), 7.31-7.47 (brm, 12H), 7.58 (brm, 2H); <sup>13</sup>C NMR (100 MHz, CDCl<sub>3</sub>): δ 168.98, 162.57, 157.72, 136.89, 135.18, 130.95, 130.60, 129.90, 128.87, 128.36, 128.17, 128.06, 127.79, 127.03, 125.44, 17.38; IR (ATR): 1712, 1654, 1626, 1542, 1495, 1450, 1401, 1291, 905, 690, 562. HRMS (ESI): Exact mass calcd for C<sub>32</sub>H<sub>25</sub>NO<sub>3</sub>Na [M+Na]<sup>+</sup>: 494.1727, Found: 494.1723.

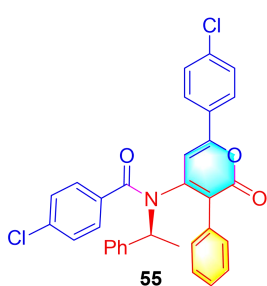

The reaction was run at 80 °C for 12 h, affording product **55** as a pale yellow solid (45.2 mg, 84% yield, m.p. = 166-167 °C); HPLC analysis (Chiralcel OD, *i*PrOH/hexane = 20/80, 1.0 mL/min, 230 nm; *t<sub>r</sub>* (major) = 24.78 min, *t<sub>r</sub>* (minor) = 10.72 min) gave the isomeric composition of the product: 98% ee,  $[\alpha]_D^{25} = -234.2$  (*c* = 1.0, CH<sub>2</sub>Cl<sub>2</sub>). <sup>1</sup>H NMR (400 MHz, CDCl<sub>3</sub>): δ 1.69 (brs, 3H), 6.29 (brm, 3H), 7.02 (brm, 3H), 7.20 (brm, 2H), 7.31-7.41 (brm, 10H), 7.48-7.52 (brm, 2H); <sup>13</sup>C NMR (100 MHz, CDCl<sub>3</sub>): δ 169.55, 162.13, 156.76, 150.36, 137.24, 133.47, 131.10, 129.84, 129.24, 129.13, 128.97, 128.56, 125.50, 128.29, 128.23, 126.97, 126.67, 17.30; IR (ATR): 1718, 1662, 1627, 1544, 1489, 1394, 1296, 1090, 1012, 822, 755, 696, 572. HRMS (ESI): Exact mass calcd for C<sub>32</sub>H<sub>23</sub>NO<sub>3</sub>Cl<sub>2</sub>Na [M+Na]<sup>+</sup>: 562.0947, Found: 562.0943.

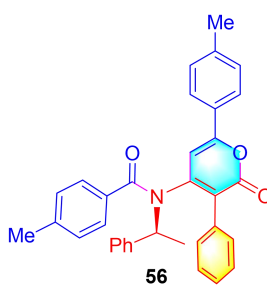

The reaction was run at 80 °C for 12 h, affording product **56** as a pale yellow solid (40.4 mg, 81% yield, m.p. = 151-152 °C); HPLC analysis (Chiralcel OD, *i*PrOH/hexane = 20/80, 1.0 mL/min, 230 nm; *t<sub>r</sub>* (major) = 9.06 min, *t<sub>r</sub>* (minor) = 7.62 min) gave the isomeric composition of the product: 95% ee,  $[\alpha]_D^{25} = -135.1$  (*c* = 1.0, CH<sub>2</sub>Cl<sub>2</sub>). <sup>1</sup>H NMR (400 MHz, CDCl<sub>3</sub>): δ 1.68 (brs, 3H), 2.34 (s, 3H), 2.40 (s, 3H), 6.31 (brm, 3H), 7.03 (brm, 6H), 7.22 (d, *J* = 8.0 Hz, 2H), 7.29-7.38 (brm, 7H), 7.47-7.48 (m, 2H); <sup>13</sup>C NMR (100 MHz, CDCl<sub>3</sub>): δ 162.78, 157.95, 151.20, 141.56, 141.39, 132.40, 131.48, 129.96, 129.57, 128.78, 128.20, 128.09, 127.90, 127.02, 125.39, 21.43, 17.36; IR (ATR): 1711, 1652, 1598, 1556, 1502, 1298, 1232, 1165, 1009, 843, 759, 684, 635, 605, 574. HRMS (ESI): Exact mass calcd for C<sub>34</sub>H<sub>29</sub>NO<sub>3</sub>Na [M+Na]<sup>+</sup>: 522.2040, Found: 522.2047.

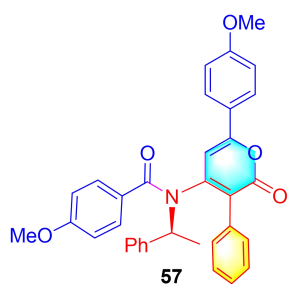

The reaction was run at 80 °C for 12 h, affording product **57** as a pale yellow solid (39.8 mg, 75% yield, m.p. = 160-161 °C); HPLC analysis (Chiralcel OD, *i*PrOH/hexane = 20/80, 1.0 mL/min, 230 nm;  $t_r$  (major) = 16.30 min,  $t_r$  (minor) = 12.73 min) gave the isomeric composition of the product: 98% ee,  $[\alpha]_D^{25} = -261.3$  ( $c = 1.0$ , CH<sub>2</sub>Cl<sub>2</sub>). <sup>1</sup>H NMR (400 MHz, CDCl<sub>3</sub>): δ 1.72 (brs, 3H), 3.80 (s, 3H), 3.86 (s, 3H), 5.97-6.27 (brm, 2H), 6.70 (d,  $J = 6.8$  Hz, 2H), 6.92 (d,  $J = 8.8$  Hz, 2H), 6.99-7.08 (brm, 4H), 7.27-7.30 (brm, 3H), 7.32-7.41 (brm, 5H), 7.55 (d,  $J = 8.4$  Hz, 2H); <sup>13</sup>C NMR (100 MHz, CDCl<sub>3</sub>): δ 170.09, 162.82, 161.90, 161.76, 157.92, 151.71, 131.68, 129.98, 129.93, 128.79, 128.09, 127.84, 127.54, 127.18, 126.96, 123.17, 114.30, 113.23, 55.44, 55.32, 17.35; IR (ATR): 1714, 1646, 1601, 1539, 1506, 1302, 1248, 1176, 1018, 838, 764, 697, 650, 614, 568. HRMS (ESI): Exact mass calcd for C<sub>34</sub>H<sub>30</sub>NO<sub>5</sub> [M+H]<sup>+</sup>: 532.2118, Found: 532.2121.

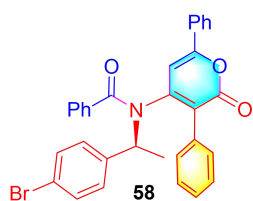

The reaction was run at 80 °C for 12 h, affording product **58** as a pale yellow solid (39.5 mg, 72% yield, m.p. = 149-150 °C); HPLC analysis (Chiralcel AD-H, *i*PrOH/hexane = 25/75, 1.0 mL/min, 230 nm;  $t_r$  (major) = 16.89 min,  $t_r$  (minor) = 18.22 min) gave the isomeric composition of the product: 97% ee,  $[\alpha]_D^{25} = -75.1$  ( $c = 1.0$ , CH<sub>2</sub>Cl<sub>2</sub>). <sup>1</sup>H NMR (500 MHz, CDCl<sub>3</sub>): δ 1.69 (brs, 3H), 5.23-6.40 (brm, 2H), 6.97-7.39 (m, 12H), 7.44-7.49 (m, 5H), 7.62 (brm, 2H); <sup>13</sup>C NMR (125 MHz, CDCl<sub>3</sub>): δ 170.44, 162.44, 157.98, 135.02, 131.89, 131.18, 131.12, 130.50, 129.83, 129.02, 128.81, 128.48, 128.23, 127.79, 125.49, 122.02, 17.51; IR (ATR): 1712, 1659, 1626, 1542, 1489, 1398, 1290, 1074, 1007, 905, 765, 688, 646, 565. HRMS (ESI): Exact mass calcd for C<sub>32</sub>H<sub>24</sub>BrNO<sub>3</sub>Na [M+Na]<sup>+</sup>: 572.0832, Found: 572.0833.

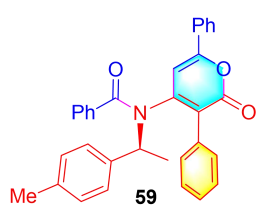

The reaction was run at 80 °C for 12 h, affording product **59** as a pale yellow solid (30.6 mg, 63% yield, m.p. = 139-140 °C); HPLC analysis (Chiralcel OD, *i*PrOH/hexane = 20/80, 1.0 mL/min, 230 nm;  $t_r$  (major) = 9.06 min,  $t_r$  (minor) = 7.62 min) gave the isomeric composition of the product: 95% ee,  $[\alpha]_D^{25} = -153.2$  ( $c = 1.0$ , CH<sub>2</sub>Cl<sub>2</sub>). <sup>1</sup>H NMR (500 MHz, CDCl<sub>3</sub>): δ 1.77 (brs, 3H), 2.38 (s, 3H), 5.43-6.51 (m, 2H), 7.19-7.44 (m, 15H), 7.58-7.76 (brm, 4H); <sup>13</sup>C NMR (125 MHz, CDCl<sub>3</sub>): δ 162.63, 157.58, 137.93, 137.33, 130.89, 130.71, 129.94, 129.47, 128.85, 128.36, 128.13, 127.86, 127.77, 127.10, 127.06, 125.48, 21.03, 17.36. IR (ATR): 1720, 1647, 1613, 1565, 1511, 1392, 1247, 1135, 1012, 863, 747, 689, 631, 621, 586. HRMS (ESI): Exact mass calcd for C<sub>33</sub>H<sub>28</sub>NO<sub>3</sub> [M+H]<sup>+</sup>: 486.2064, Found: 486.2070.

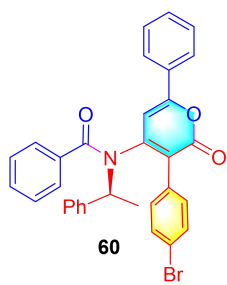

The reaction was run at 80 °C for 12 h, affording product **60** as a pale yellow solid (40.6 mg, 74% yield, m.p. = 163-164 °C); HPLC analysis (Chiralcel OD, *i*PrOH/hexane = 20/80, 1.0 mL/min, 230 nm;  $t_r$  (major) = 10.51 min,  $t_r$  (minor) = 20.61 min) gave the isomeric composition of the product: 94% ee,  $[\alpha]^{25}_D = -165.2$  ( $c = 1.0$ ,  $\text{CH}_2\text{Cl}_2$ ).  $^1\text{H}$  NMR (400 MHz,  $\text{CDCl}_3$ ):  $\delta$  1.71 (brs, 3H), 5.93-6.41 (brm, 3H), 6.83 (brm, 2H), 7.15 (brm, 2H), 7.36-7.49 (brm, 12H), 7.59-7.60 (brm, 2H);  $^{13}\text{C}$  NMR (100 MHz,  $\text{CDCl}_3$ ):  $\delta$  170.59, 162.21, 158.15, 150.94, 140.94, 134.98, 131.56, 131.32, 131.15, 130.46, 128.93, 128.21, 127.75, 127.10, 125.48, 122.63, 102.01, 56.21, 17.54; IR (ATR): 1715, 1647, 1625, 1540, 1494, 1449, 1388, 1290, 1071, 909, 826, 766, 696, 647, 515. HRMS (ESI): Exact mass calcd for  $\text{C}_{32}\text{H}_{24}\text{BrNO}_3\text{Na}$   $[\text{M}+\text{Na}]^+$ : 572.0832, Found: 572.0824.

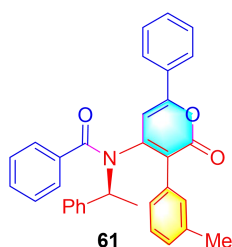

The reaction was run at 80 °C for 10 h, affording product **61** as a pale yellow solid (42.7 mg, 88% yield, m.p. = 150-151 °C); HPLC analysis (Chiralcel OD, *i*PrOH/hexane = 20/80, 1.0 mL/min, 230 nm;  $t_r$  (major) = 10.34 min,  $t_r$  (minor) = 12.51 min) gave the isomeric composition of the product: 99% ee,  $[\alpha]^{25}_D = -114.1$  ( $c = 1.0$ ,  $\text{CH}_2\text{Cl}_2$ ).  $^1\text{H}$  NMR (400 MHz,  $\text{CDCl}_3$ ):  $\delta$  1.72 (brs, 3H), 2.27 (s, 3H), 6.49-6.85 (brm, 3H), 7.13-7.24 (brm, 6H), 7.37-7.48 (brm, 10H), 7.60 (brm, 2H);  $^{13}\text{C}$  NMR (100 MHz,  $\text{CDCl}_3$ ):  $\delta$  170.54, 162.62, 157.63, 150.59, 137.63, 135.18, 130.97, 130.87, 130.73, 130.65, 129.15, 128.87, 128.84, 128.03, 127.83, 127.09, 126.62, 125.44, 21.49, 17.42. IR (ATR): 1718, 1654, 1612, 1561, 1488, 1438, 1377, 1286, 1082, 942, 875, 735, 664. HRMS (ESI): Exact mass calcd for  $\text{C}_{33}\text{H}_{27}\text{NO}_3\text{Na}$   $[\text{M}+\text{Na}]^+$ : 508.1883, Found: 508.1884.

### 3) General Procedure for the One-Pot Synthesis of Di- and Trisubstituted $\alpha$ -Pyrone

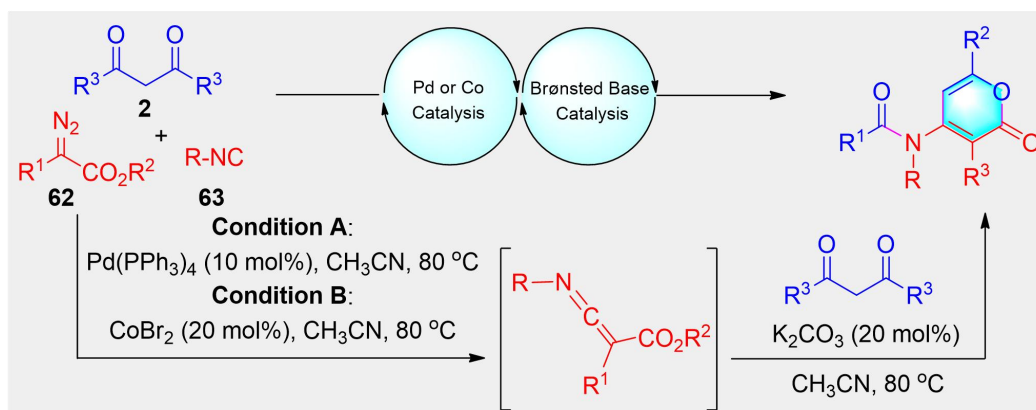

**The preparation of 3,4,6-trisubstituted  $\alpha$ -pyrones:** To an oven-dried Schlenk tube (10 mL) were successively added [Pd(PPh<sub>3</sub>)<sub>4</sub>] (10 mol%), anhydrous CH<sub>3</sub>CN (1.0 mL),  $\alpha$ -diazoacetates **62** (0.12 mmol), and isocyanides **63** (0.10 mmol). The reaction mixture was stirred vigorously at 80 °C under N<sub>2</sub> atmosphere. After the full consumption of isocyanides **63** by TLC analysis, 1,3-diketones **2** (0.10 mmol) and K<sub>2</sub>CO<sub>3</sub> (0.02 mmol) were added successively, and then the reaction mixture was stirred at 80 °C till completion. The reaction mixture was concentrated by rotary vaporation, and the residue was subjected to column chromatography using petroleum ether/ethyl acetate (from 5:1-1:1) as eluent to afford the desired 3,4,6-trisubstituted  $\alpha$ -pyrones. The NMR data of these products were the same as described above.

**The preparation of 4,6-disubstituted  $\alpha$ -pyrones:** To an oven-dried Schlenk tube (10 mL) were successively added CoBr<sub>2</sub> (20 mol%), anhydrous MeCN (1 mL),  $\alpha$ -diazoacetates **62** (0.12 mmol), isocyanides **63** (0.10 mmol), 1,3-diketones **2** (0.10 mmol) and K<sub>2</sub>CO<sub>3</sub> (0.02 mmol). The tube was backfilled with N<sub>2</sub>. After stirring at 80 °C for 12 h, the reaction mixture was cooled and concentrated under reduced pressure. The residue was purified by column chromatography (petroleum ether/EtOAc 5:1-1:1) to give the desired 4,6-disubstituted  $\alpha$ -pyrones.

#### 4) Spectral Data of 4,6-Disubstituted $\alpha$ -Pyrone

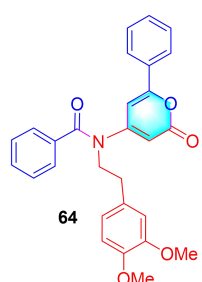

The reaction was run at 80 °C for 12 h, affording product **64** as a pale yellow solid (16.8 mg, 37% yield, m.p. = 128-129 °C); <sup>1</sup>H NMR (400 MHz, CDCl<sub>3</sub>):  $\delta$  3.02 (t, *J* = 7.2 Hz, 2H), 3.83 (s, 6H), 4.13 (t, *J* = 7.2 Hz, 2H), 5.75 (d, *J* = 2.0 Hz, 1H), 5.92 (d, *J* = 2.0 Hz, 1H), 6.74 (d, *J* = 2.0 Hz, 1H), 6.78-6.84 (m, 2H), 7.34-7.49 (m, 8H), 7.50-7.52 (m, 2H); <sup>13</sup>C NMR (100 MHz, CDCl<sub>3</sub>):  $\delta$  170.50, 162.47, 159.63, 157.77, 149.16, 148.02, 134.94, 131.84, 131.15,

130.77, 130.61, 128.84, 128.75, 128.51, 125.59, 121.13, 112.21, 111.38, 103.79, 101.47, 55.86, 51.62, 33.71; IR (ATR): 1701, 1654, 1625, 1515, 1449, 1409, 1260, 1139, 1026, 822, 794, 765, 726, 687, 632. HRMS (ESI): Exact mass calcd for C<sub>28</sub>H<sub>25</sub>NO<sub>5</sub>Na [M+Na]<sup>+</sup>: 478.1625, Found: 478.1622.

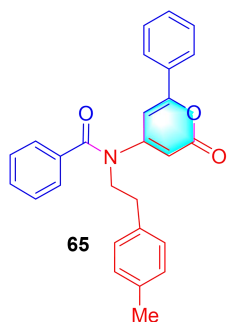

The reaction was run at 80 °C for 12 h, affording product **65** as a pale yellow solid (16.4 mg, 40% yield, m.p. = 103-104 °C); <sup>1</sup>H NMR (400 MHz, CDCl<sub>3</sub>): δ 2.31 (s, 3H), 3.04 (t, *J* = 7.2 Hz, 2H), 4.11 (t, *J* = 6.8 Hz, 2H), 5.69 (d, *J* = 2.0 Hz, 1H), 5.87 (d, *J* = 2.0 Hz, 1H), 7.15 (s, 4H), 7.35-7.49 (m, 8H), 7.50-7.53 (m, 2H); <sup>13</sup>C NMR (100 MHz, CDCl<sub>3</sub>): δ 170.51, 162.46, 159.57, 157.88, 136.63, 135.19, 134.98, 131.79, 131.10, 130.80, 129.50, 129.09, 128.81, 128.76, 128.51, 125.61, 104.06, 101.42, 51.81, 33.72, 21.01; IR (ATR): 1708, 1660, 1624, 1540, 1496, 1406, 1302, 1160, 1080, 918, 817, 795, 762, 729, 697, 631, 558. HRMS (ESI): Exact mass calcd for C<sub>27</sub>H<sub>23</sub>NO<sub>3</sub>Na [M+Na]<sup>+</sup>: 432.1570, Found: 432.1566.

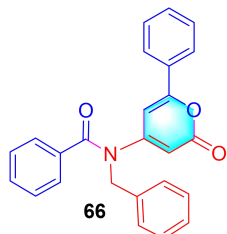

The reaction was run at 80 °C for 12 h, affording product **66** as a pale yellow solid (19.8 mg, 52% yield, m.p. = 89-90 °C); <sup>1</sup>H NMR (400 MHz, CDCl<sub>3</sub>): δ 5.19 (s, 2H), 5.88 (d, *J* = 1.6 Hz, 1H), 6.22 (d, *J* = 1.6 Hz, 1H), 7.29-7.37 (m, 7H), 7.39-7.45 (m, 5H), 7.48-7.53 (m, 1H), 7.64-7.66 (m, 2H); <sup>13</sup>C NMR (100 MHz, CDCl<sub>3</sub>): δ 170.87, 162.58, 159.30, 157.28, 136.18, 134.84, 132.05, 131.11, 130.82, 129.03, 128.87, 128.84, 128.59, 127.90, 127.03, 125.62, 102.67, 101.47, 52.36; IR (ATR): 1717, 1663, 1623, 1539, 1494, 1451, 1278, 1074, 966, 832, 765, 691, 594. HRMS (ESI): Exact mass calcd for C<sub>25</sub>H<sub>19</sub>NO<sub>3</sub>Na [M+Na]<sup>+</sup>: 404.1257, Found: 404.1262.

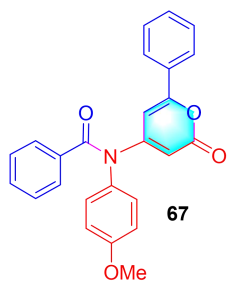

The reaction was run at 80 °C for 12 h, affording product **67** as a pale yellow solid (22.6 mg, 57% yield, m.p. = 107-108 °C); <sup>1</sup>H NMR (400 MHz, CDCl<sub>3</sub>): δ 3.76 (s, 3H), 5.56 (d, *J* = 1.6 Hz, 1H), 6.80-6.84 (m, 2H), 6.96 (d, *J* = 2.0 Hz, 1H), 7.03-7.07 (m, 2H), 7.26 (t, *J* = 8.0 Hz, 2H), 7.33-7.43 (m, 4H), 7.50-7.52 (m, 2H), 7.74-7.76 (m, 2H); <sup>13</sup>C NMR (100 MHz, CDCl<sub>3</sub>): δ 170.90, 163.19, 159.32, 159.20, 157.76, 134.71, 133.27, 131.45, 131.27, 130.85, 129.62, 129.18, 128.80, 128.23, 125.76, 115.15, 102.98, 100.36, 55.45; IR

(ATR): 1725, 1660, 1627, 1539, 1511, 1447, 1410, 1284, 1175, 1091, 1026, 901, 828, 792, 705, 602, 527. HRMS (ESI): Exact mass calcd for C<sub>25</sub>H<sub>19</sub>NO<sub>4</sub>Na [M+Na]<sup>+</sup>: 420.1206, Found: 420.1211.

## 5) Scale-Up Reaction and Transformations of The Products

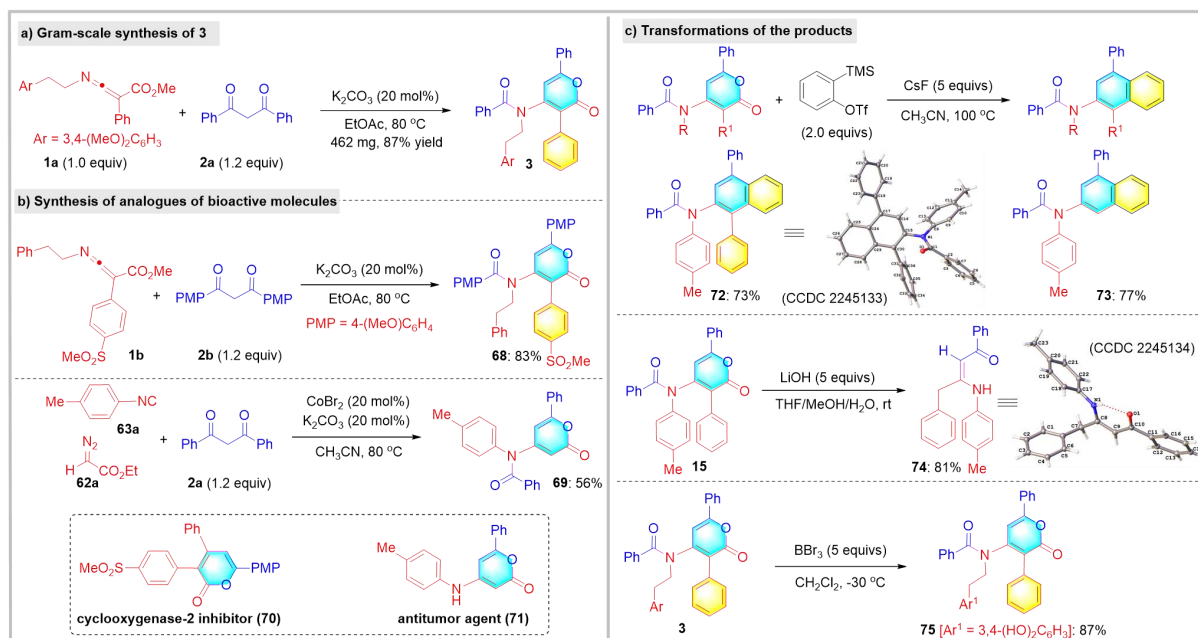

**The scale-up synthesis of 3:** To an oven-dried 10.0 mL Schlenk tube were successively added ketenimine **1a** (1.2 mmol), 1,3-diketone **2a** (1.0 mmol), anhydrous EtOAc (6 mL), and K<sub>2</sub>CO<sub>3</sub> (20 mol%). The reaction mixture was stirred vigorously at 80 °C under N<sub>2</sub> atmosphere till full consumption of 1,3-diketone **2a** by TLC analysis. The reaction mixture was then concentrated by rotary vaporation, and the residue was subjected to column chromatography using petroleum ether/ethyl acetate (from 5:1-1:1) as eluent to afford the desired product **3** in 87% yield (462 mg, pale yellow solid). The full characterization data of this compound have been described in page S4.

**The synthesis of 68:** To an oven-dried 10.0 mL Schlenk tube were successively added ketenimine **1b** (0.12 mmol), 1,3-diketone **2b** (0.10 mmol), anhydrous EtOAc (1 mL), and K<sub>2</sub>CO<sub>3</sub> (20 mol%). The reaction mixture was stirred vigorously at 80 °C under N<sub>2</sub> atmosphere till full consumption of 1,3-diketone **2b** by TLC analysis. The reaction mixture was then concentrated by rotary vaporation, and the residue was subjected to column chromatography using petroleum ether/ethyl acetate (from 5:1-1:1) as eluent to afford the desired product **68** in 83% yield (50.5 mg, pale yellow solid, m.p. = 182-183 °C).



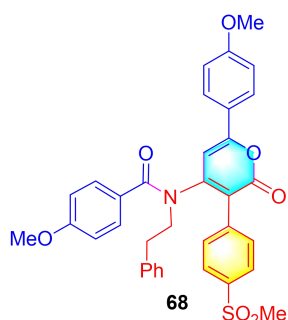

$^1\text{H}$  NMR (400 MHz,  $\text{CDCl}_3$ ):  $\delta$  3.06 (s, 3H), 3.13 (brm, 2H), 3.80 (s, 3H), 3.90 (s, 3H), 3.98 (brm, 2H), 5.69 (s, 1H), 6.66-6.69 (m, 2H), 6.93-6.97 (m, 4H), 7.08 (d,  $J = 8.4$  Hz, 2H), 7.25-7.28 (m, 2H), 7.36 (tt,  $J = 7.2, 1.2$  Hz, 1H), 7.41-7.45 (m, 2H), 7.50-7.54 (m, 2H), 7.83 (d,  $J = 8.4$  Hz, 2H);  $^{13}\text{C}$  NMR (100 MHz,  $\text{CDCl}_3$ ):  $\delta$  168.79, 162.32, 162.17, 161.90, 160.20, 155.64, 139.46, 139.39, 137.62, 130.91, 130.02, 129.54, 128.98, 127.59, 127.09, 127.00, 126.20, 122.54, 116.83, 114.21, 113.29, 99.96, 55.50, 55.36, 53.41, 44.46, 33.58; IR (ATR): 1691, 1646, 1604, 1508, 1313, 1250, 1147, 1020, 833, 761, 707, 648, 555. HRMS (ESI): Exact mass calcd for  $\text{C}_{35}\text{H}_{31}\text{NO}_7\text{SNa}$   $[\text{M}+\text{Na}]^+$ : 632.1713, Found: 632.1713.

**The synthesis of 69:** To an oven-dried Schlenk tube (10 mL) were successively added  $\text{CoBr}_2$  (20 mol%), anhydrous MeCN (1 mL), ethyl diazoacetate **62a** (0.12 mmol), 1-isocyano-4-methylbenzene **63a** (0.10 mmol), 1,3-dione **2a** (0.10 mmol) and  $\text{K}_2\text{CO}_3$  (0.02 mmol). The tube was backfilled with  $\text{N}_2$ . After stirring at 80 °C for 12 h, the reaction mixture was cooled and concentrated under reduced pressure. The residue was purified by column chromatography (petroleum ether/EtOAc 5:1-1:1) to give compound **69** in 56% yield (21.3 mg, pale yellow solid, m.p. = 93-94 °C).

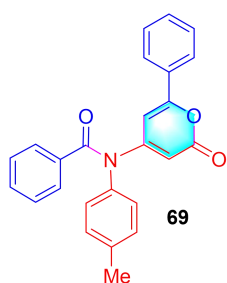

$^1\text{H}$  NMR (400 MHz,  $\text{CDCl}_3$ ):  $\delta$  2.30 (s, 3H), 5.55 (d,  $J = 1.6$  Hz, 1H), 6.94 (d,  $J = 1.6$  Hz, 1H), 7.02 (d,  $J = 8.0$  Hz, 2H), 7.12 (d,  $J = 8.0$  Hz, 2H), 7.26 (t,  $J = 7.6$  Hz, 2H), 7.33-7.43 (m, 4H), 7.51-7.53 (m, 2H), 7.74-7.76 (m, 2H);  $^{13}\text{C}$  NMR (100 MHz,  $\text{CDCl}_3$ ):  $\delta$  170.88, 163.16, 159.34, 157.71, 138.49, 138.11, 134.66, 131.52, 131.27, 130.85, 130.59, 129.24, 128.80, 128.22, 125.76, 103.28, 100.49, 21.03. IR (ATR): 1711, 1654, 1612, 1501, 1412, 1233, 1124, 1050, 853, 747, 663, 576. HRMS (ESI): Exact mass calcd for  $\text{C}_{25}\text{H}_{19}\text{NO}_3\text{Na}$   $[\text{M}+\text{Na}]^+$ : 404.1257, Found: 404.1251.

**The synthesis of 72:** To an oven-dried sealed tube (10 mL) were successively added compound **15** (0.10 mmol), anhydrous MeCN (1.0 mL), 2-(trimethylsilyl)phenyl trifluoromethanesulfonate (0.30 mmol), and caesium fluoride (0.50 mmol). The tube was backfilled with  $\text{N}_2$ . After stirring at 100 °C for 10 h, the reaction mixture was cooled and concentrated under reduced pressure. The residue was purified by column chromatography (petroleum ether/EtOAc 6:1-3:1) to give compound **72** in 73% yield (35.7 mg, pale yellow solid, m.p. = 197-198 °C).



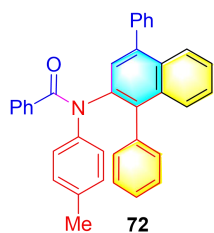

<sup>1</sup>H NMR (400 MHz, CDCl<sub>3</sub>): δ 2.18 (s, 3H), 6.58 (brs, 2H), 6.78 (d, *J* = 6.4 Hz, 2H), 7.10-7.14 (m, 3H), 7.21-7.25 (m, 3H), 7.31-7.46 (m, 7H), 7.47-7.63 (m, 6H), 7.96 (d, *J* = 8.4 Hz, 1H); <sup>13</sup>C NMR (100 MHz, CDCl<sub>3</sub>): δ 181.66, 141.38, 141.35, 141.27, 139.90, 138.37, 138.26, 138.11, 136.87, 136.83, 136.81, 136.76, 136.09, 135.06, 134.04, 131.06, 130.62, 130.16, 130.04, 129.93, 129.01, 128.89, 128.43, 128.27, 127.67, 127.51, 127.49, 127.07, 126.43, 126.19, 126.15, 126.11, 20.82; IR (ATR): 1656, 1611, 1509, 1487, 1397, 1272, 882, 756, 693, 583. HRMS (ESI): Exact mass calcd for C<sub>36</sub>H<sub>27</sub>NONa [M+Na]<sup>+</sup>: 512.1985, Found: 512.1987.

**The synthesis of 73:** To an oven-dried sealed tube (10 mL) were successively added compound **69** (0.10 mmol), anhydrous MeCN (1.0 mL), 2-(trimethylsilyl)phenyl trifluoromethanesulfonate (0.30 mmol), and caesium fluoride (0.50 mmol). The tube was backfilled with N<sub>2</sub>. After stirring at 100 °C for 10 h, the reaction mixture was cooled and concentrated under reduced pressure. The residue was purified by column chromatography (petroleum ether/EtOAc 6:1-3:1) to give compound **73** in 77% yield (31.8 mg, pale yellow solid, m.p. = 103-104 °C).

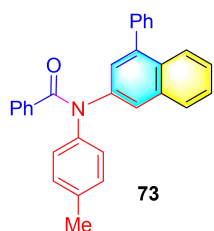

<sup>1</sup>H NMR (400 MHz, CDCl<sub>3</sub>): δ 2.32 (s, 3H), 7.10 (s, 4H), 7.20-7.24 (m, 2H), 7.28-7.32 (m, 2H), 7.36-7.46 (m, 7H), 7.51-7.53 (m, 2H), 7.56 (d, *J* = 2.4 Hz, 1H), 7.74 (d, *J* = 8.0 Hz, 1H), 7.84 (d, *J* = 8.4 Hz, 1H); <sup>13</sup>C NMR (100 MHz, CDCl<sub>3</sub>): δ 170.85, 141.29, 141.22, 140.99, 139.75, 136.32, 136.21, 134.06, 130.15, 129.97, 129.83, 129.18, 128.23, 128.18, 127.91, 127.47, 127.45, 126.71, 126.33, 126.14, 125.90, 124.70, 21.01; IR (ATR): 1662, 1613, 1542, 1493, 1386, 1281, 1187, 1065, 809, 729, 687. HRMS (ESI): Exact mass calcd for C<sub>30</sub>H<sub>23</sub>NONa [M+Na]<sup>+</sup>: 436.1672, Found: 436.1668.

**The synthesis of 74:** To a 3.0 mL vial were successively added compound **15** (0.10 mmol), THF (0.40 mL), MeOH (0.40 mL), H<sub>2</sub>O (0.20 mL), and LiOH (1.0 mmol). After stirring at rt for 1.5 h, the reaction mixture was extracted with EtOAc (3 mL × 3). The combined organic phase was dried over Na<sub>2</sub>SO<sub>4</sub>, and concentrated under reduced pressure. The residue was purified by column chromatography (petroleum ether/EtOAc 3:1-1:1) to give compound **74** in 81% yield (26.5 mg, pale yellow solid, m.p. = 73-74 °C).

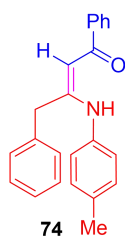

**74**  $^1\text{H}$  NMR (400 MHz,  $\text{CDCl}_3$ ):  $\delta$  2.35 (s, 3H), 3.74 (s, 2H), 5.82 (s, 1H), 7.01 (d,  $J$  = 8.0 Hz, 2H), 7.11-7.14 (m, 4H), 7.20-7.30 (m, 3H), 7.38-7.46 (m, 3H), 7.84-7.87 (m, 2H), 13.05 (s, 1H);  $^{13}\text{C}$  NMR (100 MHz,  $\text{CDCl}_3$ ):  $\delta$  188.81, 164.65, 140.04, 136.77, 136.10, 135.59, 130.85, 129.67, 128.82, 128.53, 128.22, 127.06, 126.74, 125.56, 94.33, 38.58, 20.96. IR (ATR): 3453, 1722, 1653, 1604, 1553, 1477, 1392, 1245, 1132, 1047, 846, 733, 659. HRMS (ESI): Exact mass calcd for  $\text{C}_{23}\text{H}_{21}\text{NONa}$   $[\text{M}+\text{Na}]^+$ : 350.1515, Found: 350.1512.

**The synthesis of 75:** To an oven-dried Schlenk tube (10 mL) were successively added compound **3** (0.10 mmol), anhydrous  $\text{CH}_2\text{Cl}_2$  (2.0 mL), and  $\text{BBr}_3$  (0.50 mmol). The tube was backfilled with  $\text{N}_2$ . After stirring at  $-30\text{ }^\circ\text{C}$  for 8 h, the reaction mixture was quenched with  $\text{H}_2\text{O}$  (6.0 mL) and then extracted with  $\text{CH}_2\text{Cl}_2$  (5 mL  $\times$  3). The combined organic phase was dried over  $\text{Na}_2\text{SO}_4$ , and concentrated under reduced pressure. The residue was purified by column chromatography (petroleum ether/EtOAc 1:1-1:2) to give compound **75** in 87% yield (43.8 mg, yellow oil).

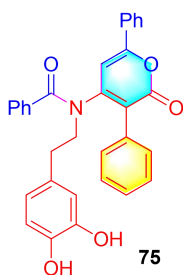

**75**  $^1\text{H}$  NMR (400 MHz,  $\text{CDCl}_3$ ):  $\delta$  2.84 (brm, 2H), 3.50 (brm, 2H), 5.76 (s, 1H), 6.03 (s, 1H), 6.56 (d,  $J$  = 8.0 Hz, 1H), 6.62 (s, 1H), 6.81-6.83 (m, 2H), 6.89 (d,  $J$  = 6.8 Hz, 2H), 6.95 (d,  $J$  = 7.6 Hz, 2H), 7.12 (t,  $J$  = 8.0 Hz, 2H), 7.28-7.34 (m, 4H), 7.41-7.43 (m, 3H), 7.54-7.56 (m, 2H);  $^{13}\text{C}$  NMR (100 MHz,  $\text{CDCl}_3$ ):  $\delta$  170.41, 162.61, 158.83, 153.70, 144.21, 143.23, 134.33, 131.51, 131.30, 131.18, 131.11, 130.32, 130.31, 129.89, 128.97, 128.59, 128.39, 128.03, 127.93, 125.58, 121.50, 116.24, 115.52, 102.49, 53.49, 49.54, 32.86; IR (ATR): 3325, 1657, 1619, 1529, 1444, 1286, 927, 772, 697, 626, 577. HRMS (ESI): Exact mass calcd for  $\text{C}_{32}\text{H}_{25}\text{NO}_5\text{Na}$   $[\text{M}+\text{Na}]^+$ : 526.1625, Found: 526.1622.

## 6) Mechanistic Studies

We studied the reaction mechanism of  $K_2CO_3$  catalyzed formal insertion of ketenimines into C(CO)-C bonds of 1,3-diketones by a series of control experiments. Finally, we found that when the reaction of 2-isopropylphenyl substituted ketenimine **1c** and 1,3-di-*o*-tolylpropane-1,3-dione **2c** was stirred at 80 °C for 1 h, both the Mannich adduct **76** and  $\alpha$ -pyrone **77** could be detected through TLC and LC-MS analysis. However, despite the large steric hindrance, the Mannich adduct **76** was almost fully converted into  $\alpha$ -pyrone **77** after the reaction mixture was stirred at 80 °C for 5 h. The structure of compound **77** was characterized by NMR, IR and HRMS.

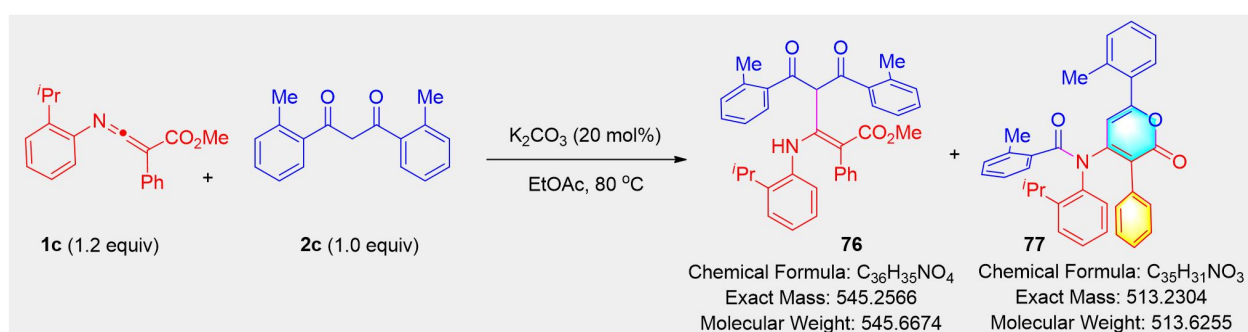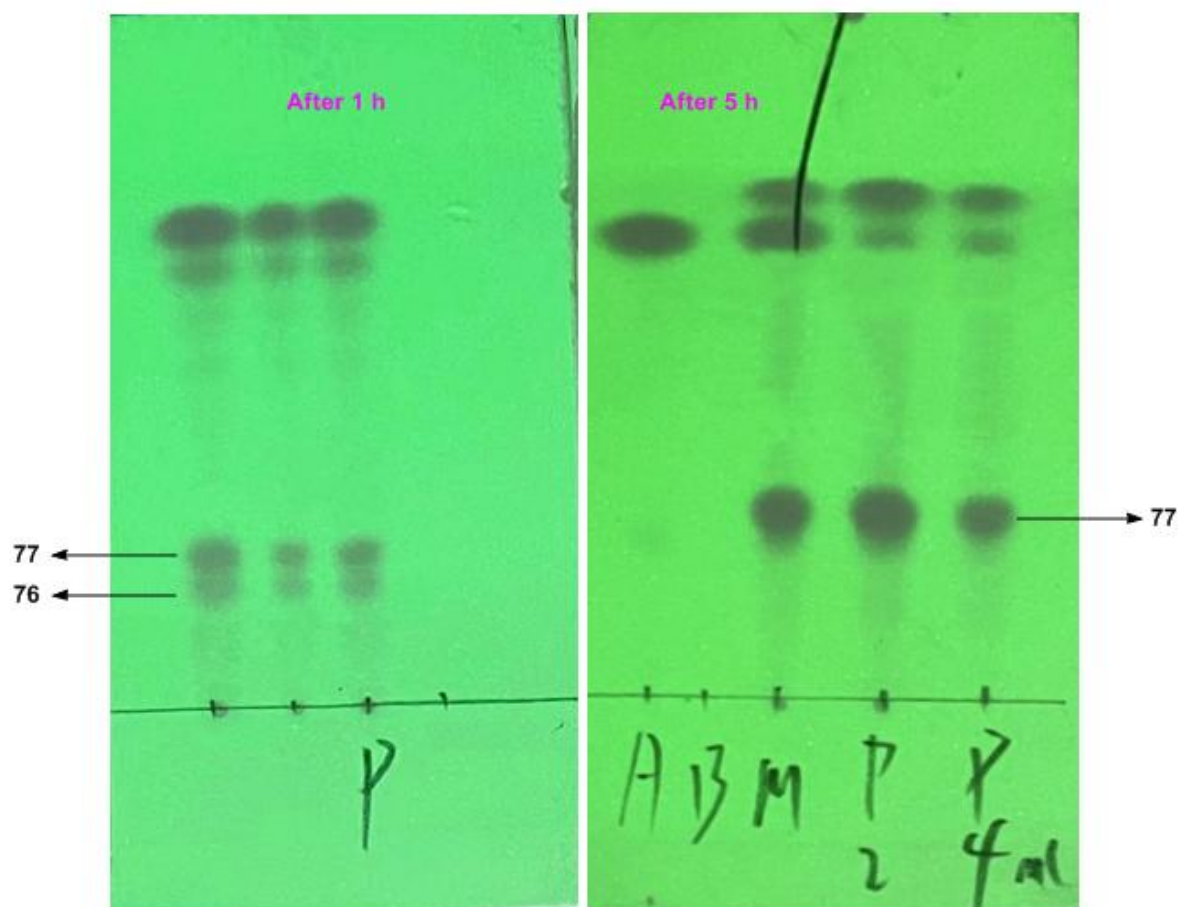

Monitoring the reaction by TLC

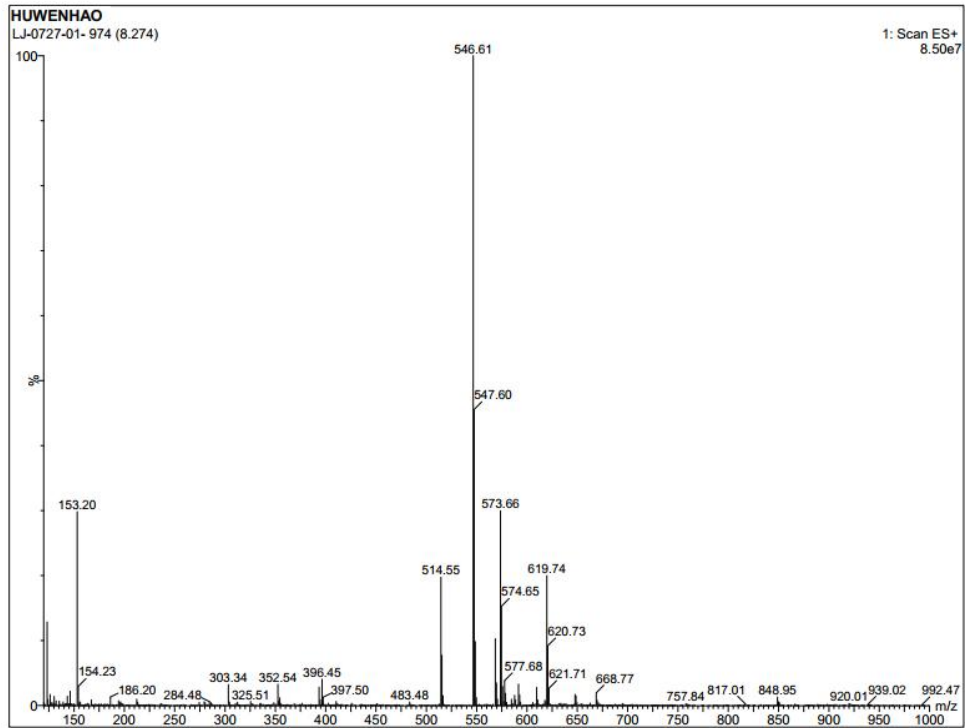

After 1 h

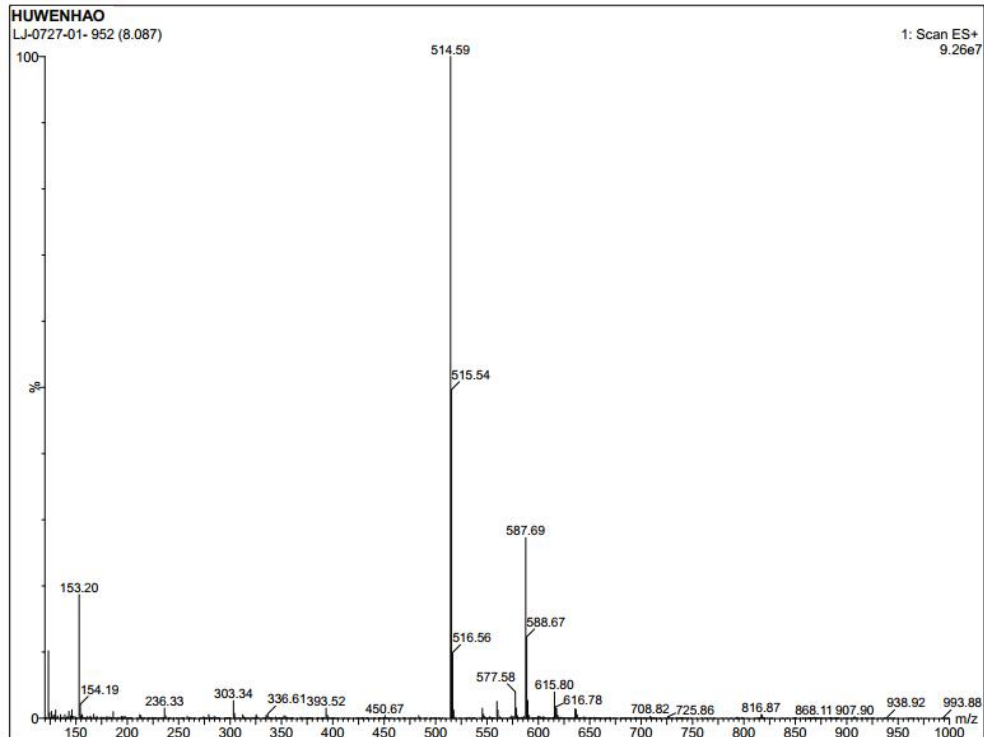

After 5 h

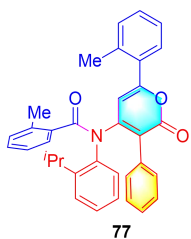

The reaction was run at 80 °C for 5 h, affording product **77** as a pale green solid (35.9 mg, 70% yield, m.p. = 195-196 °C); <sup>1</sup>H NMR (500 MHz, CDCl<sub>3</sub>): δ 1.16 (d, *J* = 5.0 Hz, 3H), 1.19 (d, *J* = 7.0 Hz, 3H), 2.31 (brs, 3H), 2.46 (brs, 3H), 3.18 (brm, 1H), 6.15-6.66 (m, 3H), 6.91-7.18 (m, 7H), 7.24-7.28 (m, 6H), 7.37 (t, *J* = 7.5 Hz, 1H), 7.47-7.53 (m, 1H); <sup>13</sup>C NMR (125 MHz, CDCl<sub>3</sub>): δ 170.71, 163.40, 159.79, 138.29, 136.68, 132.41, 131.77, 131.28, 130.40, 130.34, 129.56, 129.06, 128.38, 128.33, 128.08, 127.64, 127.06, 126.14, 124.76, 107.82, 28.39, 23.85, 23.34, 20.71, 19.93. IR (ATR): 1702, 1676, 1603, 1534, 1423, 1396, 1283, 956, 782, 773, 652, 565. HRMS (ESI): Exact mass calcd for C<sub>35</sub>H<sub>31</sub>NO<sub>3</sub>Na [M+Na]<sup>+</sup>: 536.2196, Found: 536.2191.

## 7) Device Fabrication and Characterizations

At first, we prepared single component **51** or SimCP2 solution (10 mg ml<sup>-1</sup>, chlorobenzene as solvent) in N<sub>2</sub>-filled glovebox and then thoroughly dissolved by successive heat stirring at 50 °C for 2 h. After that, the blended solutions at different blending ratios (SimCP2:**51**, (100-x):x, x= 1~7 wt.%) were prepared by blending these solutions as required. For device fabrications, ITO-covered glass substrate (ITO thickness = 110 nm, sheet resistance = 15 Ω sq<sup>-1</sup>) was cleaned and dried using routine method and then processed by UV-ozone treatment in air for 25 min (ref. J. Ye, Y. He, K. Li, L. Liu, C. Xi, Z. Liu, Y. Ma, B. Zhang, Y. Bao, W. Wang, Y. Cheng, L. Niu, *ACS Appl. Mater. Interfaces* **2022**, *14*, 17698-17708). After that, water dispersion of PEDOT:PSS (Clevious PVP AI4083, Heraeus) was spin-coated onto the ITO substrate and then dried in air drying oven at 120 °C (30 min.). The thickness of such PEDOT:PSS layer was about 50 nm. Subsequently, the device samples were transferred into N<sub>2</sub>-filled glovebox. Those SimCP2:**51** blended solutions were spin-coated onto the surface of ITO/PEDOT:PSS at 1800 rpm (1 min.), followed by thermal annealing at 100 °C (30 min.) to obtain the emissive layer with a thickness of ca. 30 nm. Finally, those device samples were loaded into thermal evaporating chamber (Angstrom Engineering Corp., Canada, EVOVAC) for the subsequent thermal evaporation of DPEPO (10 nm)/TmPyPB (50 nm)/LiF (1nm)/Al (100 nm) in sequence. The base pressure for thermal evaporation is generally less than 5 × 10<sup>-6</sup> mbar and the deposition rate is 0.1 nm s<sup>-1</sup>. The emissive area of each device is 3.5 × 4 mm<sup>2</sup>, as defined by the overlap zone byetewen the Al top electrode and ITO bottom electrode. All those preparing procedures, except for the ITO and PEDOT:PSS layer, were performed under the protection of N<sub>2</sub>-filled glove box (mBraun- UNIlab, Shanghai, [O<sub>2</sub>] < 0.1 ppm, [H<sub>2</sub>O] < 0.1 ppm).

Those as-fabricated OLEDs were then measured by commercial OLED testing equipment (FS-2000TR, Fstar, Soochow, China), in which current-voltage source Keithley 2400 and high-resolution spectroradiometer CS2000A were inter-connected and computer-controlled by a home-made software. During the measurement, luminance and EL spectra were directly measured by CS2000A. All those OLEDs were not encapsulated and tested in air. For the calculations of EQE performance parameters, these OLEDs were routinely assumed as Lambert emitters.

## 8) Physical and Material Properties

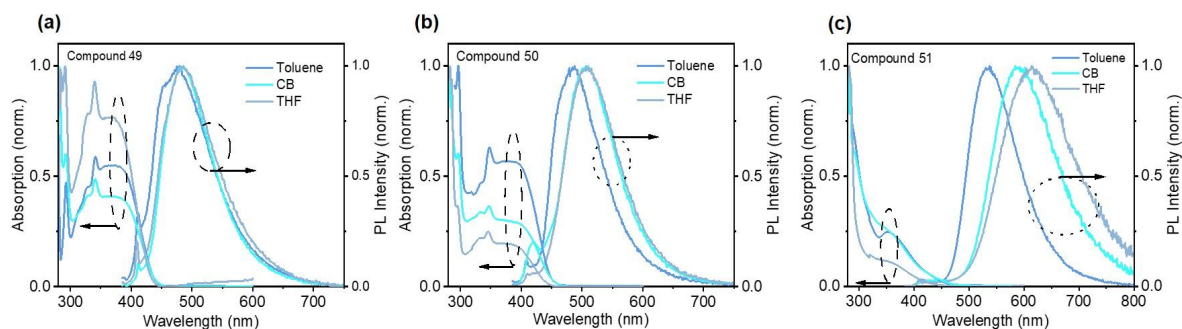

**Figure S1.** Absorption and PL spectra of compounds **49** (a), **50** (b) and **51** (c), respectively, in different solvent ( $10^{-5}$ M).

**Table S1.** Photophysical parameters of **49-51** in different solvents.

| Compound  | Solvent | $\lambda_{\text{abs.}}^{[a]}$ | $\lambda_{\text{PL}}^{[a]}$ | $E_g^{[a]}$ | FWHM |
|-----------|---------|-------------------------------|-----------------------------|-------------|------|
|           |         | [nm]                          | [nm]                        | [nm]        | [nm] |
| <b>49</b> | Toluene | 340                           | 475                         | 2.81        | 108  |
|           | CB      | 340                           | 482                         | 2.82        | 97   |
|           | THF     | 341                           | 484                         | 2.85        | 106  |
| <b>50</b> | Toluene | 347                           | 485                         | 2.77        | 93   |
|           | CB      | 345                           | 507                         | 2.74        | 99   |
|           | THF     | 345                           | 510                         | 2.80        | 103  |
| <b>51</b> | Toluene | 353                           | 533                         | 2.69        | 104  |
|           | CB      | 352                           | 590                         | 2.86        | 134  |
|           | THF     | 320                           | 615                         | 2.92        | 156  |

<sup>[a]</sup> Measured in solution with a concentration of  $10^{-5}$  M.

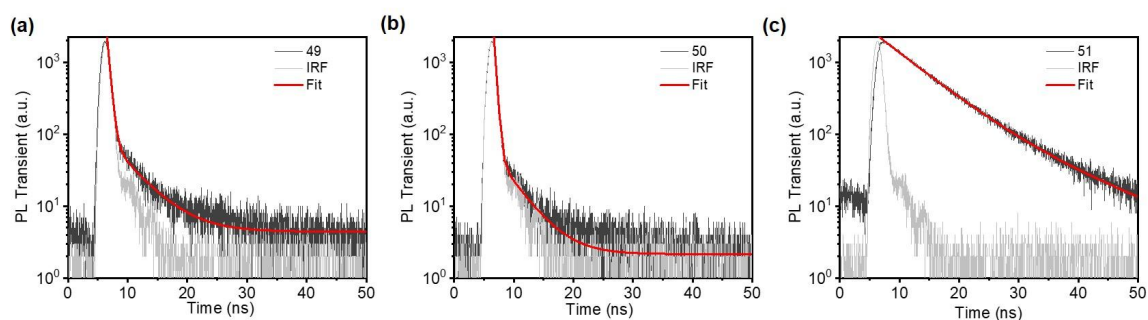

**Figure S2.** PL transient decay of compounds **49** (a), **50** (b) and **51** (c), respectively, in solution ( $10^{-5}$ M, CB as solvent).

**Table S2.** Fitting results of PL transient decays of **49-51** in solution.

| Compound  | $\tau_1$<br>[ns] | $A_1$    | $\tau_2$<br>[ns] | $A_2$    | $\chi^2$ | $\tau_{ave}$<br>[ns] |
|-----------|------------------|----------|------------------|----------|----------|----------------------|
| <b>49</b> | 0.4455           | 1624.506 | 4.4219           | 76.6985  | 1.3865   | 1.7143               |
| <b>50</b> | 0.3385           | 1155.333 | 3.6333           | 48.0219  | 1.2854   | 1.3550               |
| <b>51</b> | 6.5389           | 1934.428 | 23.1639          | 102.3752 | 1.0211   | 9.1635               |

[a] The average lifetime calculated by  $\tau_{ave} = \frac{\sum A_i \tau_i^2}{\sum A_i \tau_i}$ , where  $A_i$  is the pre-exponential for lifetime  $\tau_i$  ( $i = 1, 2$ ) shown in the Table.

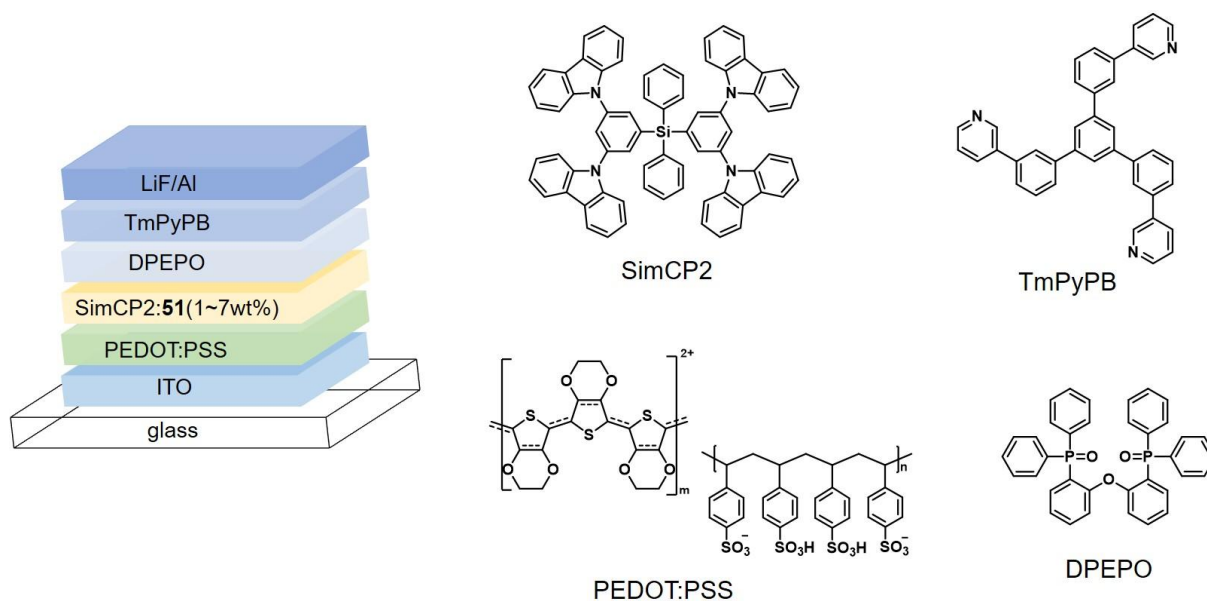



**Figure S3.** Chemical structures of materials (except **51**) using in solution-processed OLEDs.

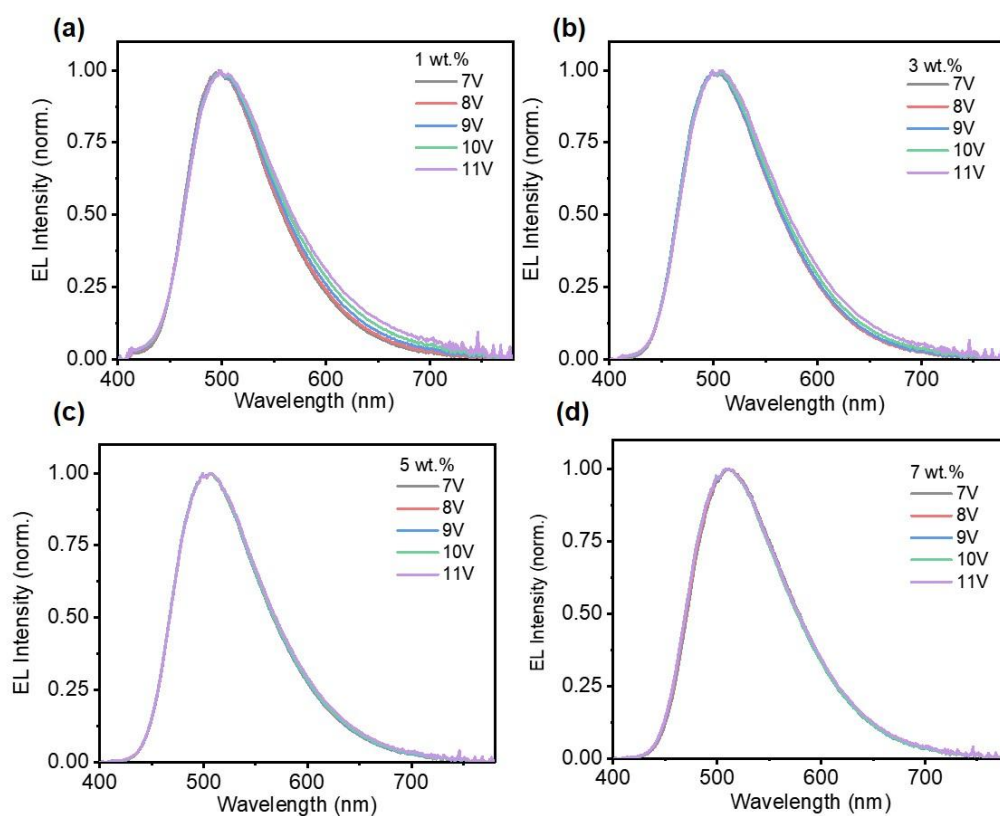

**Figure S4.** Bias-dependent EL spectra of solution-processed OLEDs using **47** dopant at different doping concentrations, i.e. 1 wt.% (a), 3 wt.% (b), 5 wt.% (c) and 7 wt.% (d), respectively.

## 9) X-Ray Crystallographic Data for Compounds 30, 47, 48, 72 and 74

Data intensity of **30** was collected using a Bruker 'Bruker APEX-II CCD' diffractometer at 292.99(10) K. Data collection and reduction were done by using Olex2 and the structure was solved with the ShelXS structure solution program using direct methods and refined by full-matrix least-squares on F<sup>2</sup> with anisotropic displacement parameters for non-H atoms using SHELX-97. Hydrogen atoms were added at their geometrically ideal positions and refined isotropically. CCDC deposition number 2245130 (**30**).

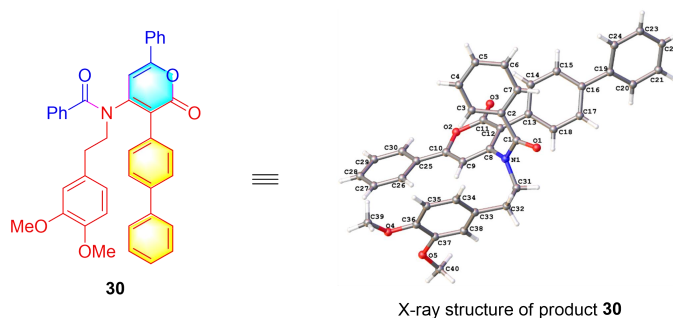

### Crystal data.

|                                             |                                                               |
|---------------------------------------------|---------------------------------------------------------------|
| Empirical formula                           | C <sub>40</sub> H <sub>33</sub> NO <sub>5</sub>               |
| Formula weight                              | 607.67                                                        |
| Temperature/K                               | 292.99(10)                                                    |
| Crystal system                              | monoclinic                                                    |
| Space group                                 | P2 <sub>1</sub> /c                                            |
| a/Å                                         | 13.5520(14)                                                   |
| b/Å                                         | 10.2862(10)                                                   |
| c/Å                                         | 23.234(3)                                                     |
| α/°                                         | 90                                                            |
| β/°                                         | 95.963(10)                                                    |
| γ/°                                         | 90                                                            |
| Volume/Å <sup>3</sup>                       | 3221.2(6)                                                     |
| Z                                           | 4                                                             |
| ρ <sub>calc</sub> /cm <sup>3</sup>          | 1.253                                                         |
| μ/mm <sup>-1</sup>                          | 0.082                                                         |
| F(000)                                      | 1280.0                                                        |
| Crystal size/mm <sup>3</sup>                | 0.12 × 0.11 × 0.09                                            |
| Radiation                                   | Mo Kα (λ = 0.71073)                                           |
| 2θ range for data collection/°              | 4.334 to 59.21                                                |
| Index ranges                                | -18 ≤ h ≤ 14, -13 ≤ k ≤ 10, -32 ≤ l ≤ 22                      |
| Reflections collected                       | 16913                                                         |
| Independent reflections                     | 7598 [R <sub>int</sub> = 0.0563, R <sub>sigma</sub> = 0.1036] |
| Data/restraints/parameters                  | 7598/0/418                                                    |
| Goodness-of-fit on F <sup>2</sup>           | 1.024                                                         |
| Final R indexes [I >= 2σ (I)]               | R <sub>1</sub> = 0.0724, wR <sub>2</sub> = 0.1445             |
| Final R indexes [all data]                  | R <sub>1</sub> = 0.1788, wR <sub>2</sub> = 0.1931             |
| Largest diff. peak/hole / e Å <sup>-3</sup> | 0.36/-0.21                                                    |

Data intensity of **47** was collected using a Bruker 'Bruker APEX-II CCD' diffractometer at 150.00(10) K. Data collection and reduction were done by using Olex2 and the structure was solved with the ShelXS structure solution program using direct methods and refined by full-matrix least-squares on F<sup>2</sup> with anisotropic displacement parameters for non-H atoms using SHELX-97. Hydrogen atoms were added at their geometrically ideal positions and refined isotropically. CCDC deposition number 2245131 (**47**).

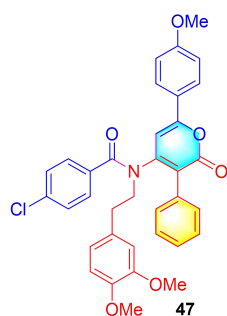

≡

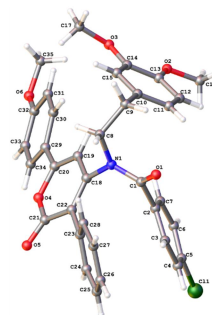

X-ray structure of product **47**

#### Crystal data.

|                                             |                                                               |
|---------------------------------------------|---------------------------------------------------------------|
| Empirical formula                           | C <sub>35</sub> H <sub>30</sub> ClNO <sub>6</sub>             |
| Formula weight                              | 596.05                                                        |
| Temperature/K                               | 150.00(10)                                                    |
| Crystal system                              | monoclinic                                                    |
| Space group                                 | P2 <sub>1</sub> /c                                            |
| a/Å                                         | 10.4332(5)                                                    |
| b/Å                                         | 10.0121(4)                                                    |
| c/Å                                         | 27.9684(13)                                                   |
| α/°                                         | 90                                                            |
| β/°                                         | 98.050(4)                                                     |
| γ/°                                         | 90                                                            |
| Volume/Å <sup>3</sup>                       | 2892.7(2)                                                     |
| Z                                           | 4                                                             |
| ρ <sub>calc</sub> /cm <sup>3</sup>          | 1.369                                                         |
| μ/mm <sup>-1</sup>                          | 1.577                                                         |
| F(000)                                      | 1248.0                                                        |
| Crystal size/mm <sup>3</sup>                | 0.13 × 0.12 × 0.11                                            |
| Radiation                                   | Cu Kα (λ = 1.54184)                                           |
| 2θ range for data collection/°              | 6.384 to 147.464                                              |
| Index ranges                                | -12 ≤ h ≤ 12, -8 ≤ k ≤ 12, -34 ≤ l ≤ 29                       |
| Reflections collected                       | 10780                                                         |
| Independent reflections                     | 5666 [R <sub>int</sub> = 0.0409, R <sub>sigma</sub> = 0.0602] |
| Data/restraints/parameters                  | 5666/0/392                                                    |
| Goodness-of-fit on F <sup>2</sup>           | 1.046                                                         |
| Final R indexes [I ≥ 2σ (I)]                | R <sub>1</sub> = 0.0530, wR <sub>2</sub> = 0.1325             |
| Final R indexes [all data]                  | R <sub>1</sub> = 0.0732, wR <sub>2</sub> = 0.1478             |
| Largest diff. peak/hole / e Å <sup>-3</sup> | 0.30/-0.39                                                    |

Data intensity of **48** was collected using a Bruker 'Bruker APEX-II CCD' diffractometer at 150.00(10) K. Data collection and reduction were done by using Olex2 and the structure was solved with the ShelXS structure solution program using direct methods and refined by full-matrix least-squares on F<sup>2</sup> with anisotropic displacement parameters for non-H atoms using SHELX-97. Hydrogen atoms were added at their geometrically ideal positions and refined isotropically. CCDC deposition number 2245132 (**48**).

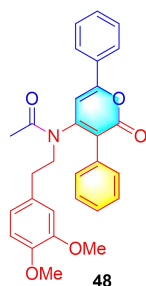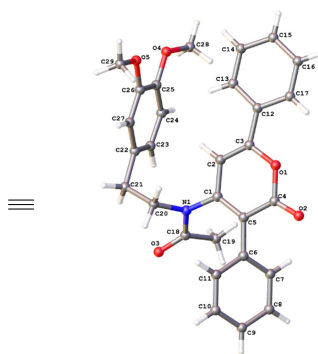

X-ray structure of product **48**

Crystal data.

|                                             |                                                                |
|---------------------------------------------|----------------------------------------------------------------|
| Empirical formula                           | C <sub>29</sub> H <sub>27</sub> NO <sub>5</sub>                |
| Formula weight                              | 469.51                                                         |
| Temperature/K                               | 150.00(10)                                                     |
| Crystal system                              | triclinic                                                      |
| Space group                                 | P-1                                                            |
| a/Å                                         | 11.0361(5)                                                     |
| b/Å                                         | 14.2348(5)                                                     |
| c/Å                                         | 16.7656(6)                                                     |
| α/°                                         | 79.529(3)                                                      |
| β/°                                         | 88.302(3)                                                      |
| γ/°                                         | 75.050(4)                                                      |
| Volume/Å <sup>3</sup>                       | 2501.88(18)                                                    |
| Z                                           | 4                                                              |
| ρ <sub>calc</sub> /cm <sup>3</sup>          | 1.246                                                          |
| μ/mm <sup>-1</sup>                          | 0.085                                                          |
| F(000)                                      | 992.0                                                          |
| Crystal size/mm <sup>3</sup>                | 0.13 × 0.12 × 0.11                                             |
| Radiation                                   | Mo Kα (λ = 0.71073)                                            |
| 2θ range for data collection/°              | 4.214 to 59.222                                                |
| Index ranges                                | -13 ≤ h ≤ 15, -18 ≤ k ≤ 19, -22 ≤ l ≤ 22                       |
| Reflections collected                       | 21663                                                          |
| Independent reflections                     | 11671 [R <sub>int</sub> = 0.0320, R <sub>sigma</sub> = 0.0651] |
| Data/restraints/parameters                  | 11671/0/637                                                    |
| Goodness-of-fit on F <sup>2</sup>           | 1.023                                                          |
| Final R indexes [I ≥ 2σ (I)]                | R <sub>1</sub> = 0.0603, wR <sub>2</sub> = 0.1368              |
| Final R indexes [all data]                  | R <sub>1</sub> = 0.0963, wR <sub>2</sub> = 0.1608              |
| Largest diff. peak/hole / e Å <sup>-3</sup> | 1.12/-0.22                                                     |

Data intensity of **72** was collected using a Bruker 'Bruker APEX-II CCD' diffractometer at 170.00(10) K. Data collection and reduction were done by using Olex2 and the structure was solved with the ShelXS structure solution program using direct methods and refined by full-matrix least-squares on F<sup>2</sup> with anisotropic displacement parameters for non-H atoms using SHELX-97. Hydrogen atoms were added at their geometrically ideal positions and refined isotropically. CCDC deposition number 2245133 (**72**).

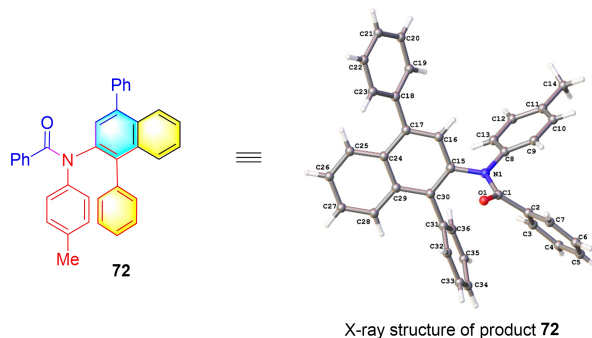

X-ray structure of product **72**

|                                             |                                                               |
|---------------------------------------------|---------------------------------------------------------------|
| Crystal data.                               |                                                               |
| Empirical formula                           | C <sub>36</sub> H <sub>27</sub> NO                            |
| Formula weight                              | 489.58                                                        |
| Temperature/K                               | 170.00(10)                                                    |
| Crystal system                              | triclinic                                                     |
| Space group                                 | P-1                                                           |
| a/Å                                         | 10.3653(9)                                                    |
| b/Å                                         | 11.5399(8)                                                    |
| c/Å                                         | 12.1483(9)                                                    |
| α/°                                         | 86.936(6)                                                     |
| β/°                                         | 75.711(7)                                                     |
| γ/°                                         | 69.063(7)                                                     |
| Volume/Å <sup>3</sup>                       | 1314.21(19)                                                   |
| Z                                           | 2                                                             |
| ρ <sub>calc</sub> /cm <sup>3</sup>          | 1.237                                                         |
| μ/mm <sup>-1</sup>                          | 0.568                                                         |
| F(000)                                      | 516.0                                                         |
| Crystal size/mm <sup>3</sup>                | 0.14 × 0.12 × 0.10                                            |
| Radiation                                   | Cu Kα (λ = 1.54184)                                           |
| 2θ range for data collection/°              | 7.514 to 146.72                                               |
| Index ranges                                | -12 ≤ h ≤ 12, -10 ≤ k ≤ 14, -14 ≤ l ≤ 14                      |
| Reflections collected                       | 8974                                                          |
| Independent reflections                     | 5121 [R <sub>int</sub> = 0.0343, R <sub>sigma</sub> = 0.0471] |
| Data/restraints/parameters                  | 5121/0/344                                                    |
| Goodness-of-fit on F <sup>2</sup>           | 1.164                                                         |
| Final R indexes [I >= 2σ (I)]               | R <sub>1</sub> = 0.0485, wR <sub>2</sub> = 0.1269             |
| Final R indexes [all data]                  | R <sub>1</sub> = 0.0652, wR <sub>2</sub> = 0.1374             |
| Largest diff. peak/hole / e Å <sup>-3</sup> | 0.18/-0.26                                                    |

Data intensity of **74** was collected using a Bruker 'Bruker APEX-II CCD' diffractometer at 170.00(10) K. Data collection and reduction were done by using Olex2 and the structure was solved with the ShelXS structure solution program using direct methods and refined by full-matrix least-squares on F<sup>2</sup> with anisotropic displacement parameters for non-H atoms using SHELX-97. Hydrogen atoms were added at their geometrically ideal positions and refined isotropically. CCDC deposition number 2245134 (**74**).

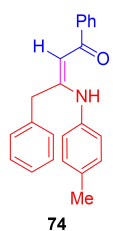

≡

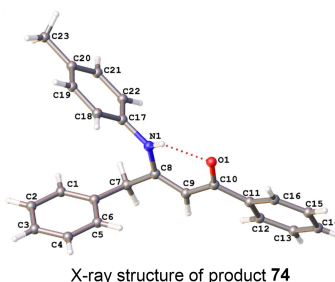

|                                             |                                                               |
|---------------------------------------------|---------------------------------------------------------------|
| Crystal data.                               |                                                               |
| Empirical formula                           | C <sub>23</sub> H <sub>21</sub> NO                            |
| Formula weight                              | 327.41                                                        |
| Temperature/K                               | 170.00(10)                                                    |
| Crystal system                              | triclinic                                                     |
| Space group                                 | P-1                                                           |
| a/Å                                         | 5.8318(4)                                                     |
| b/Å                                         | 11.6046(8)                                                    |
| c/Å                                         | 26.5835(15)                                                   |
| α/°                                         | 86.525(5)                                                     |
| β/°                                         | 87.942(5)                                                     |
| γ/°                                         | 87.181(5)                                                     |
| Volume/Å <sup>3</sup>                       | 1792.6(2)                                                     |
| Z                                           | 4                                                             |
| ρ <sub>calc</sub> /cm <sup>3</sup>          | 1.213                                                         |
| μ/mm <sup>-1</sup>                          | 0.571                                                         |
| F(000)                                      | 696.0                                                         |
| Crystal size/mm <sup>3</sup>                | 0.14 × 0.12 × 0.09                                            |
| Radiation                                   | Cu Kα (λ = 1.54184)                                           |
| 2θ range for data collection/°              | 6.666 to 148.43                                               |
| Index ranges                                | -7 ≤ h ≤ 5, -14 ≤ k ≤ 14, -32 ≤ l ≤ 32                        |
| Reflections collected                       | 12192                                                         |
| Independent reflections                     | 7010 [R <sub>int</sub> = 0.0461, R <sub>sigma</sub> = 0.0583] |
| Data/restraints/parameters                  | 7010/0/453                                                    |
| Goodness-of-fit on F <sup>2</sup>           | 1.098                                                         |
| Final R indexes [I >= 2σ (I)]               | R <sub>1</sub> = 0.0614, wR <sub>2</sub> = 0.1720             |
| Final R indexes [all data]                  | R <sub>1</sub> = 0.0868, wR <sub>2</sub> = 0.1892             |
| Largest diff. peak/hole / e Å <sup>-3</sup> | 0.40/-0.28                                                    |

# 10) Copies of <sup>1</sup>H NMR and <sup>13</sup>C NMR Spectra of Products 3-76

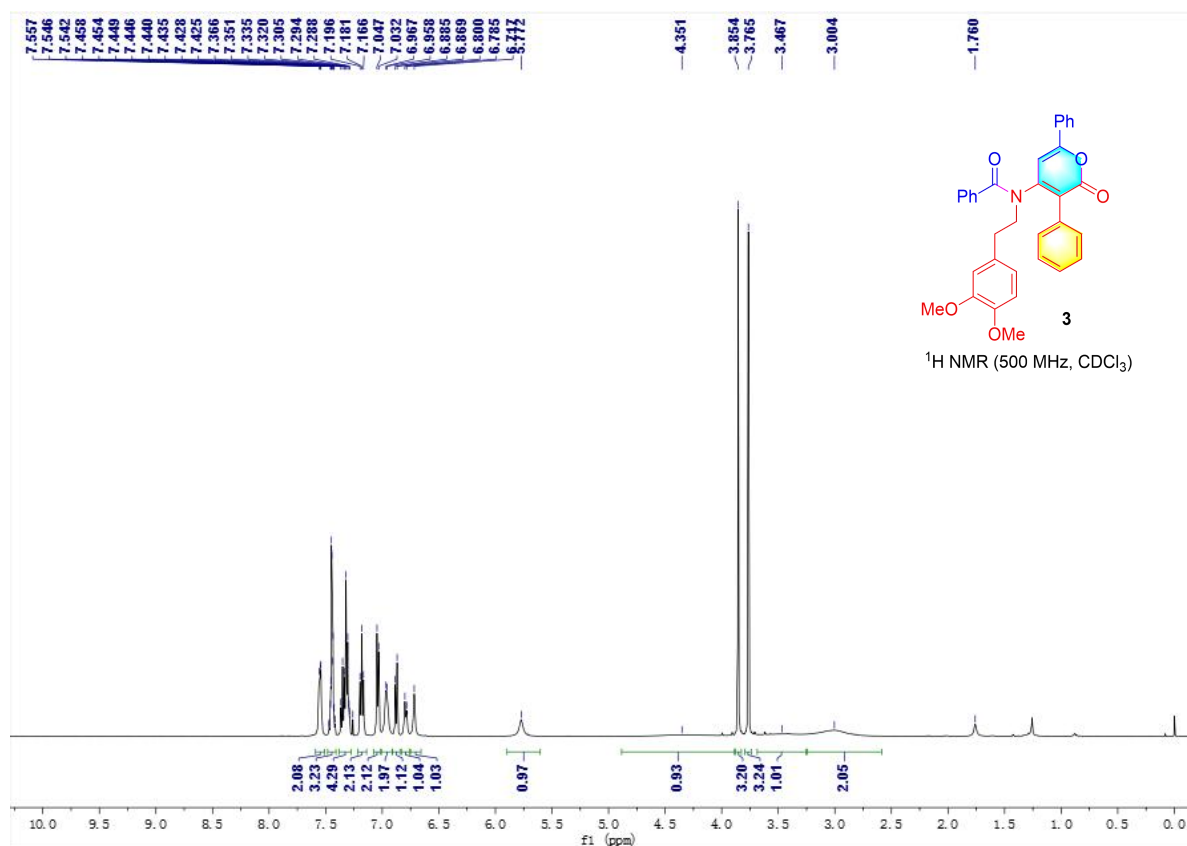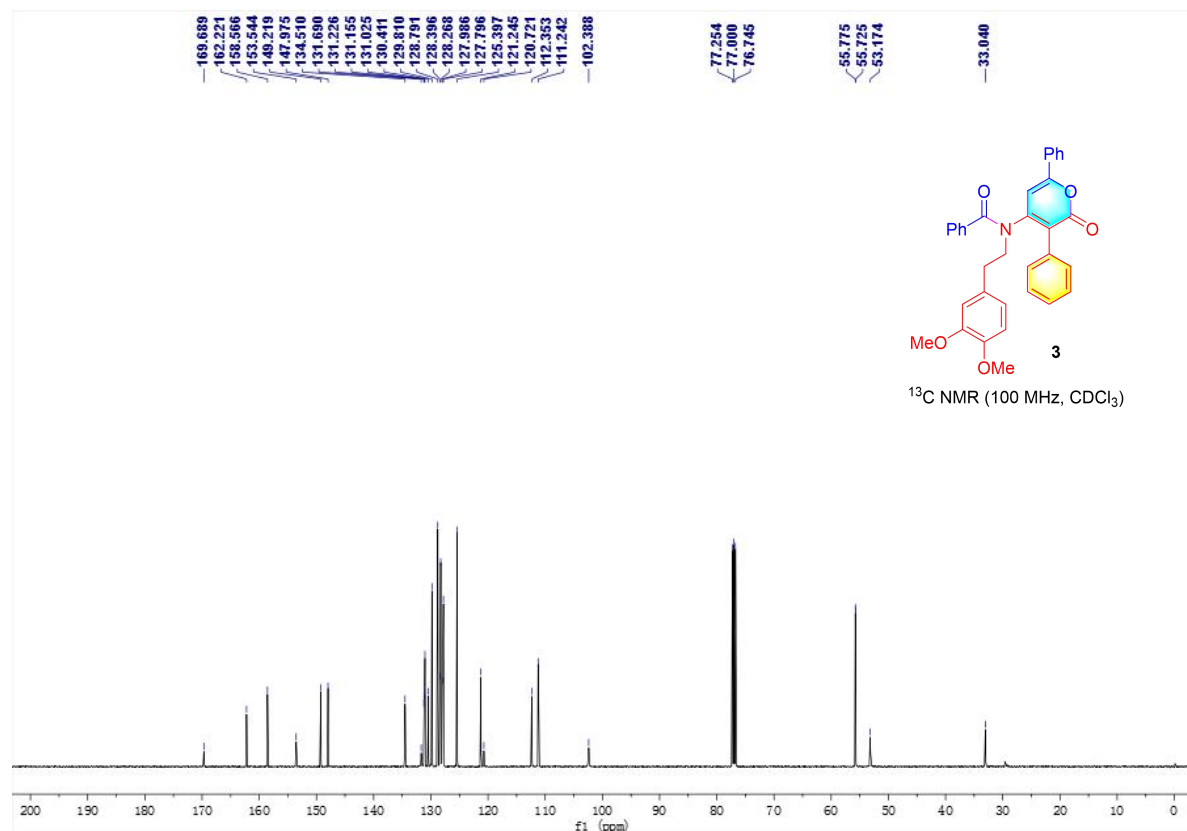



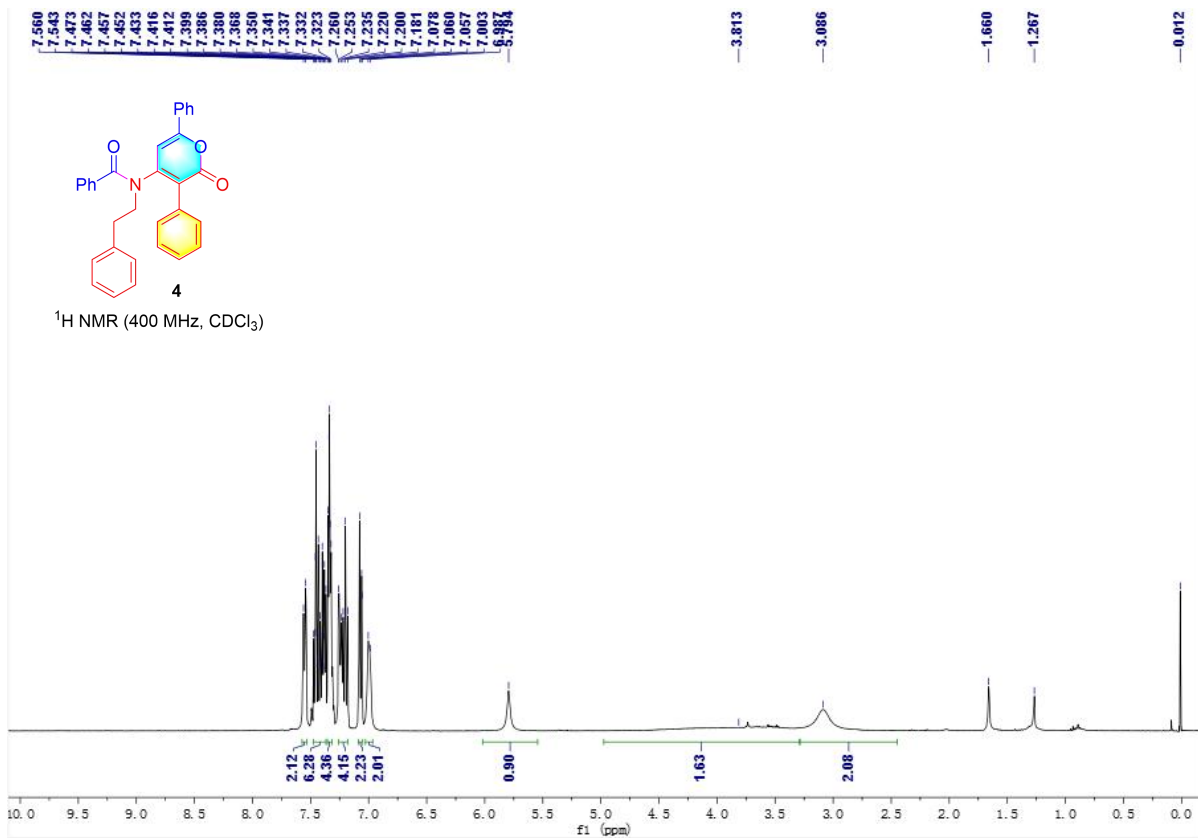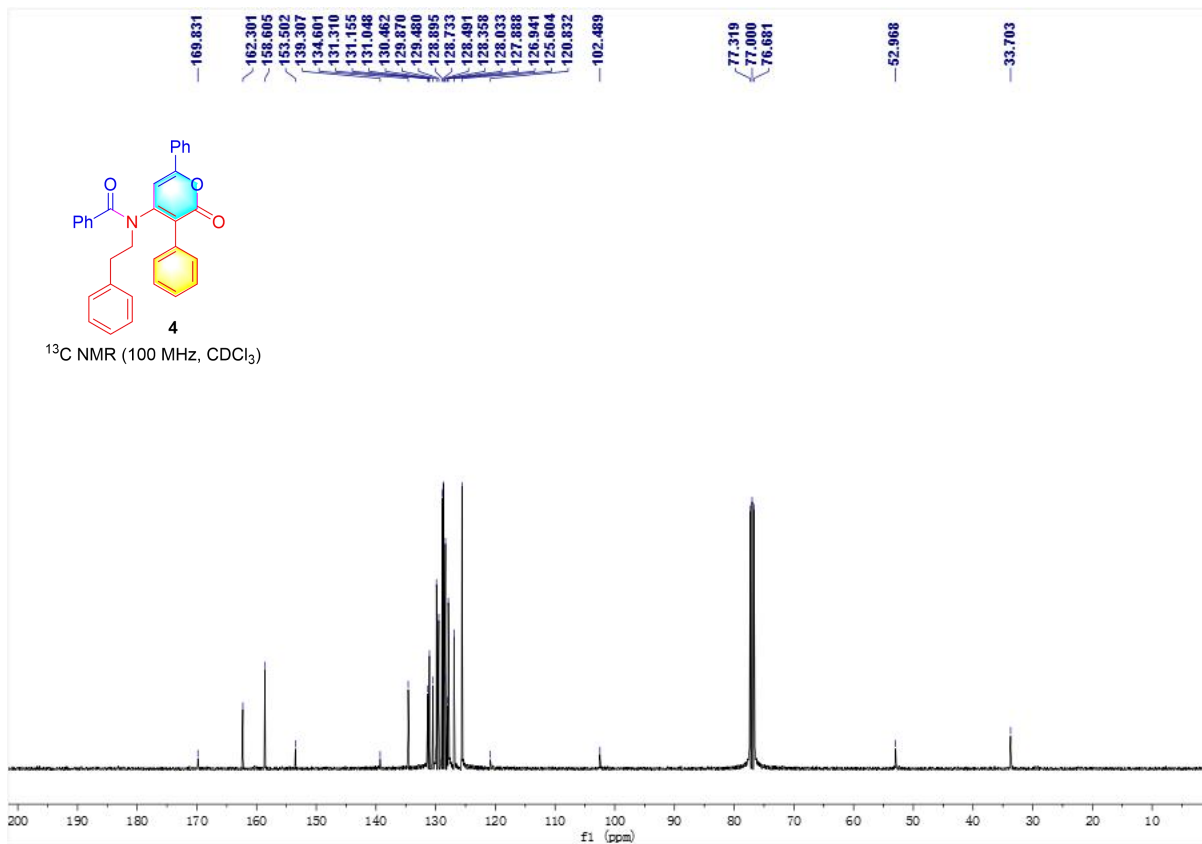

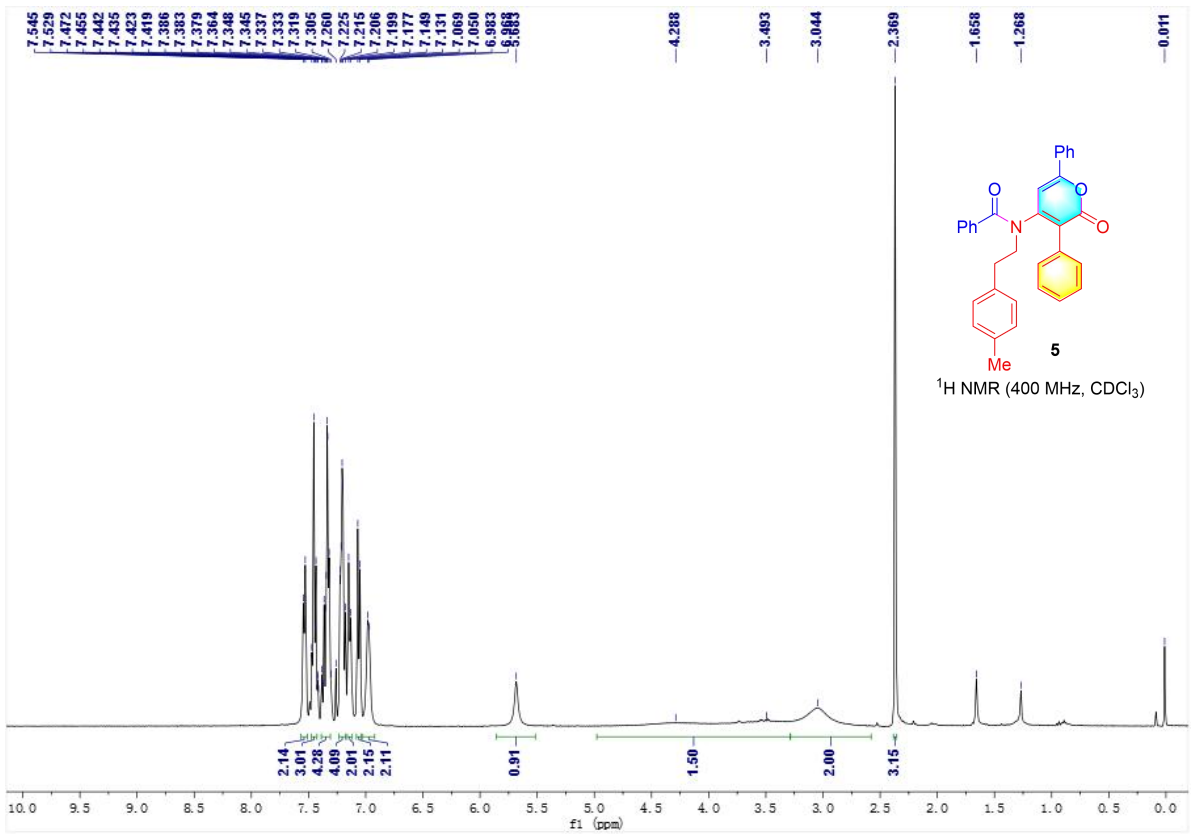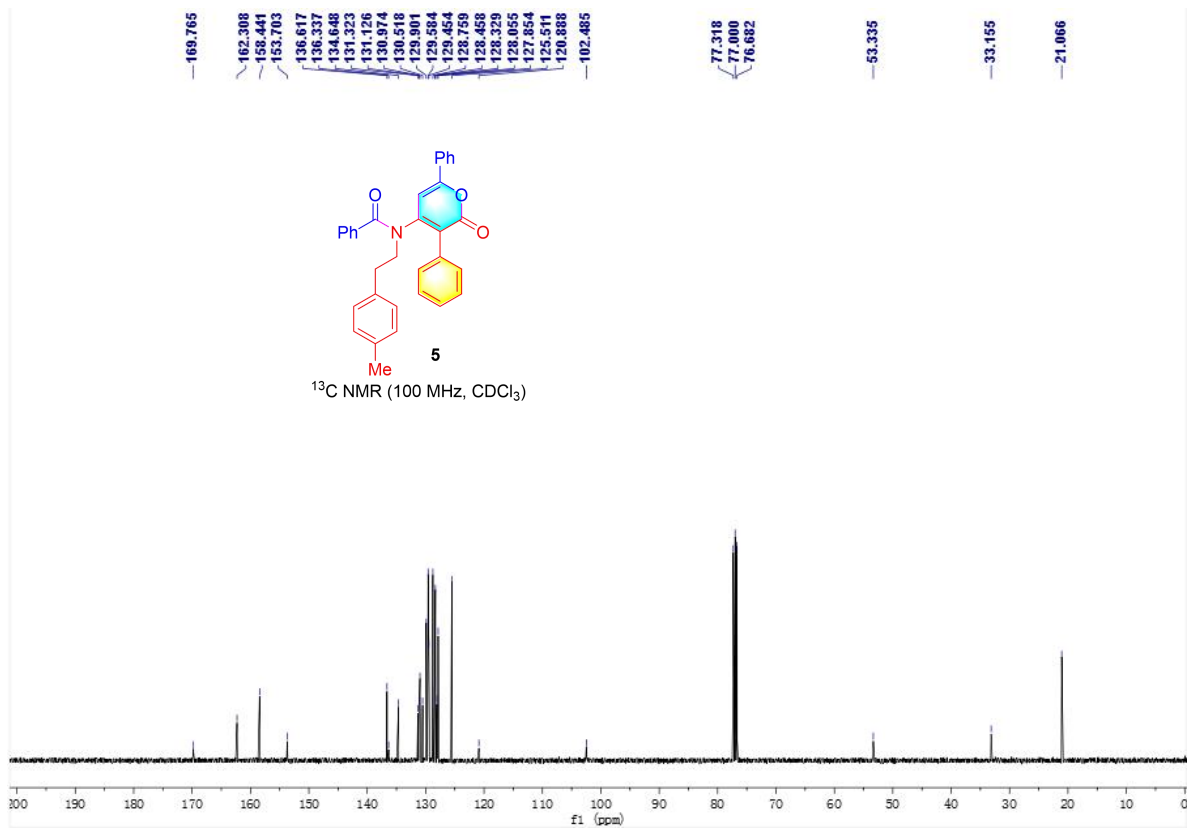

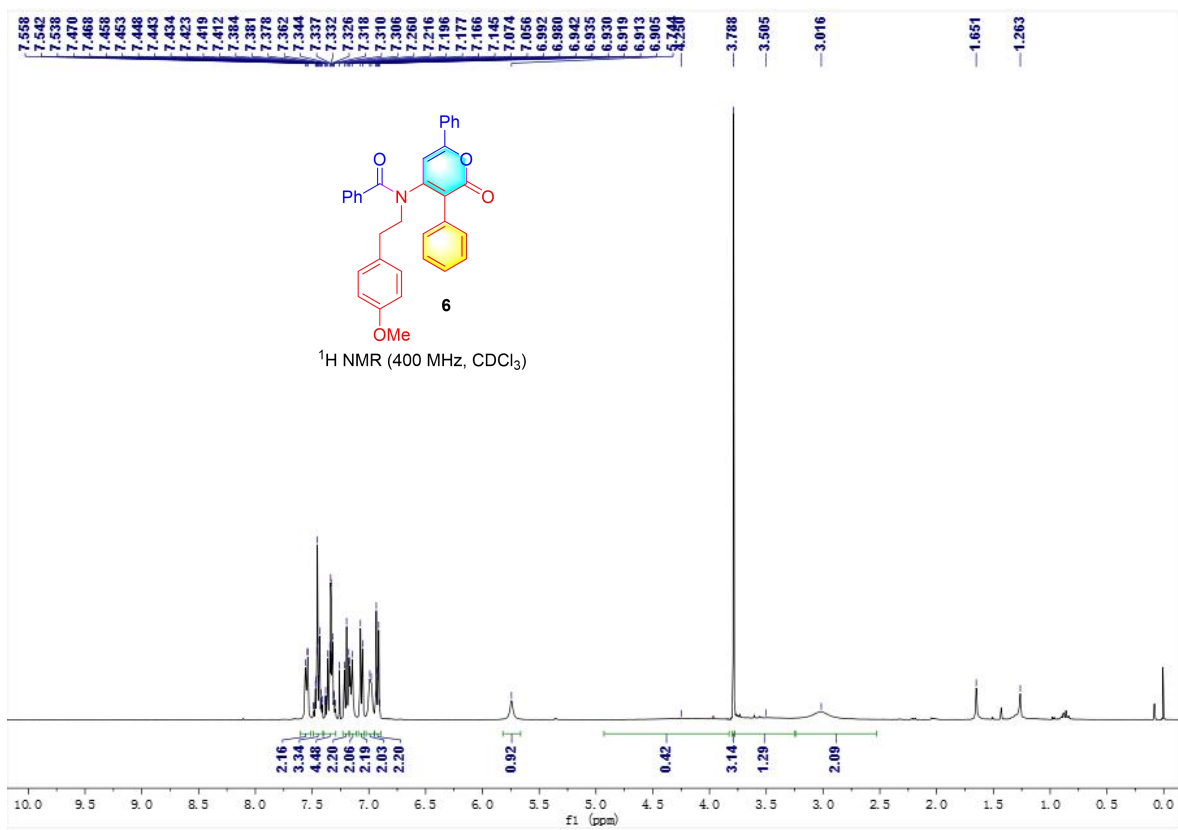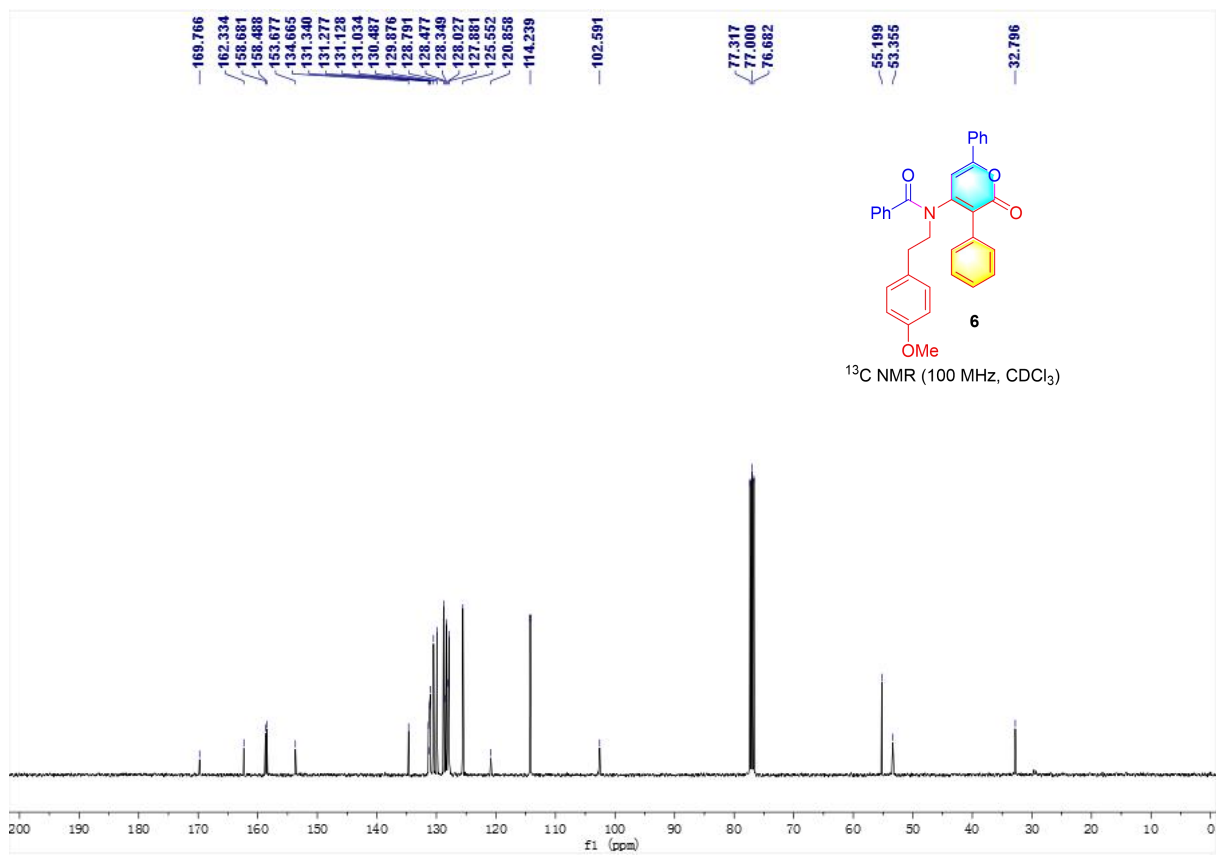

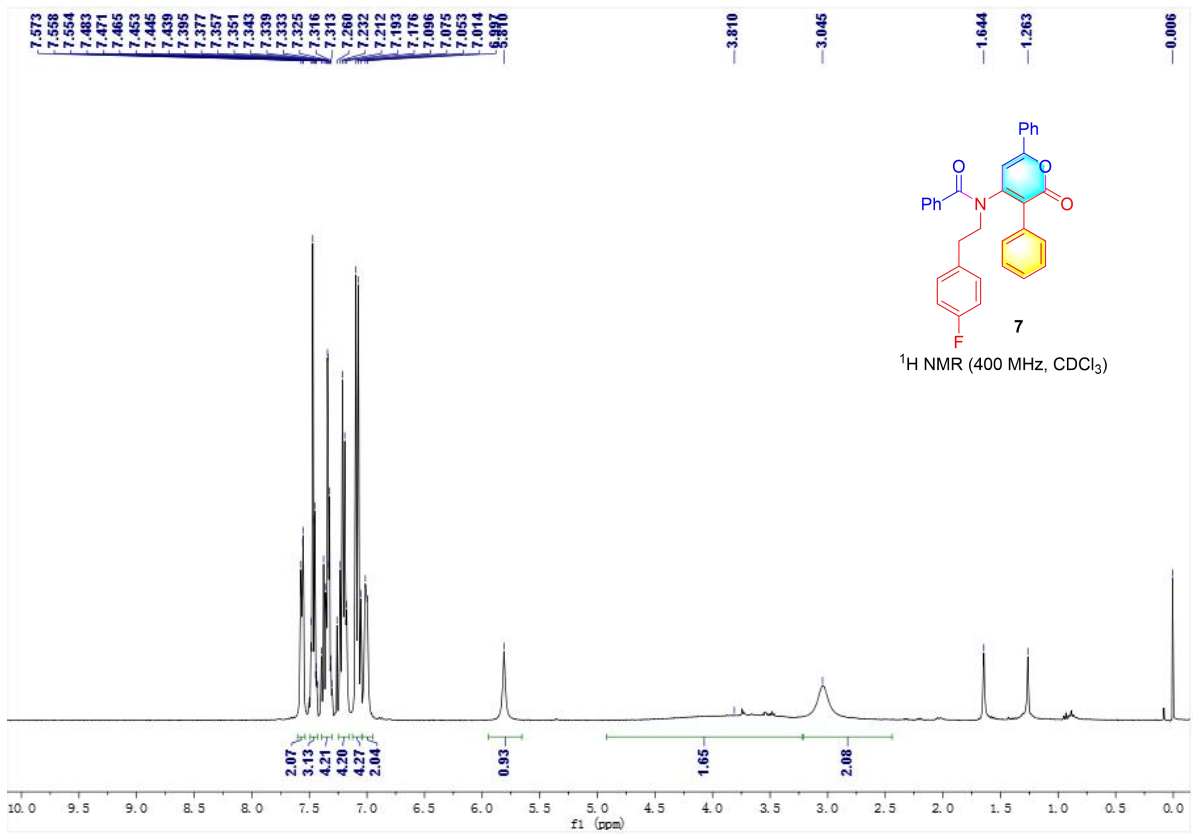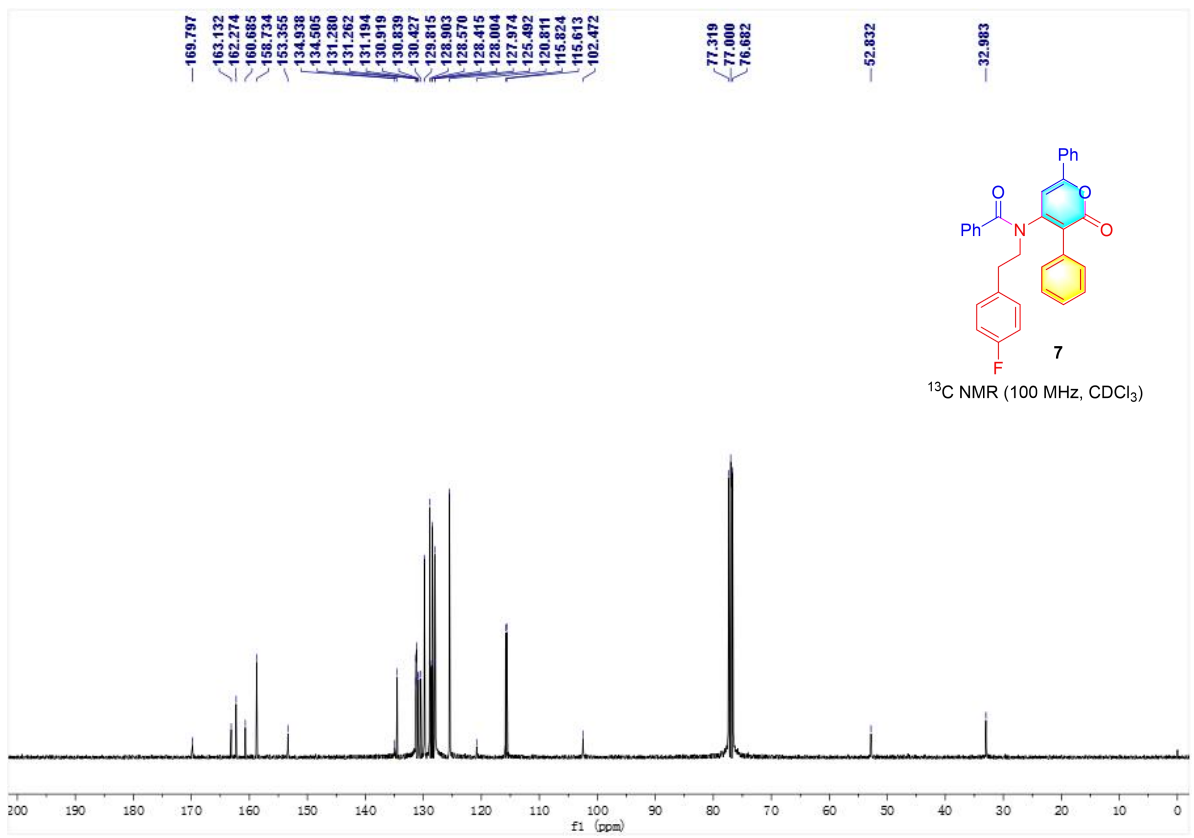



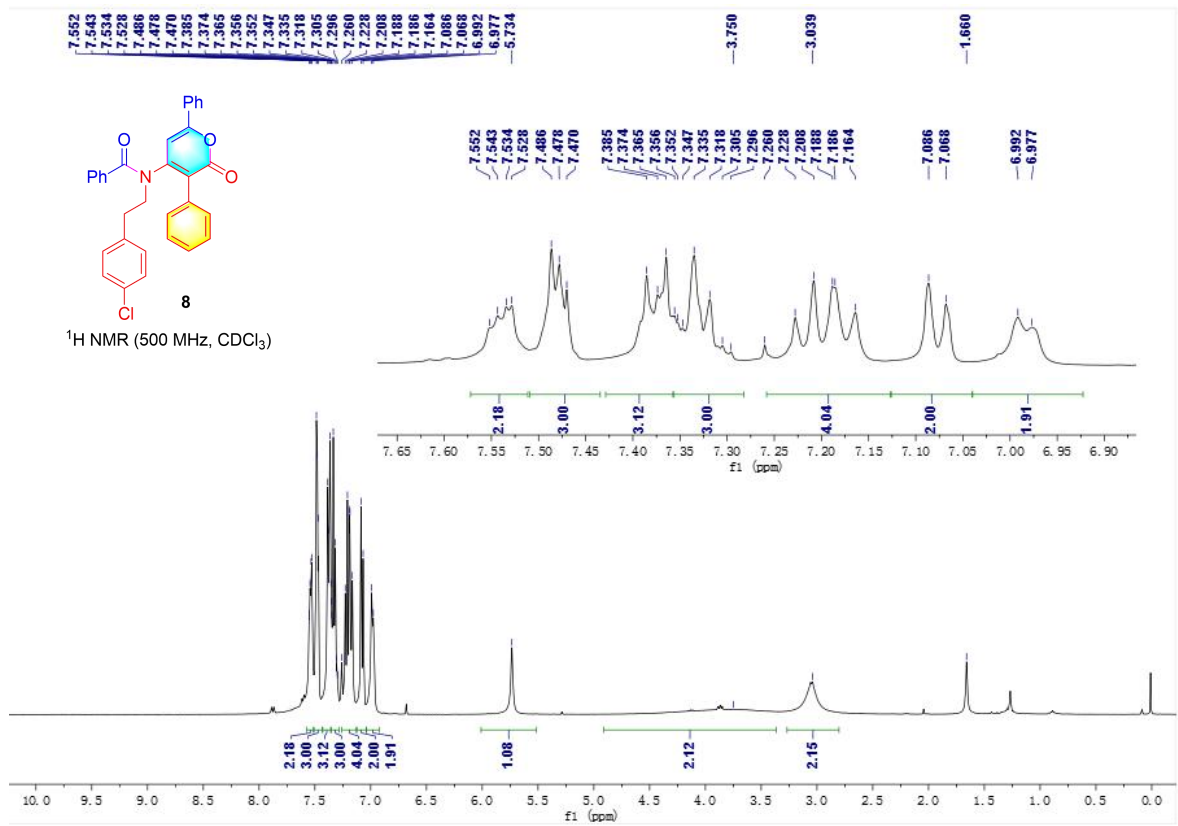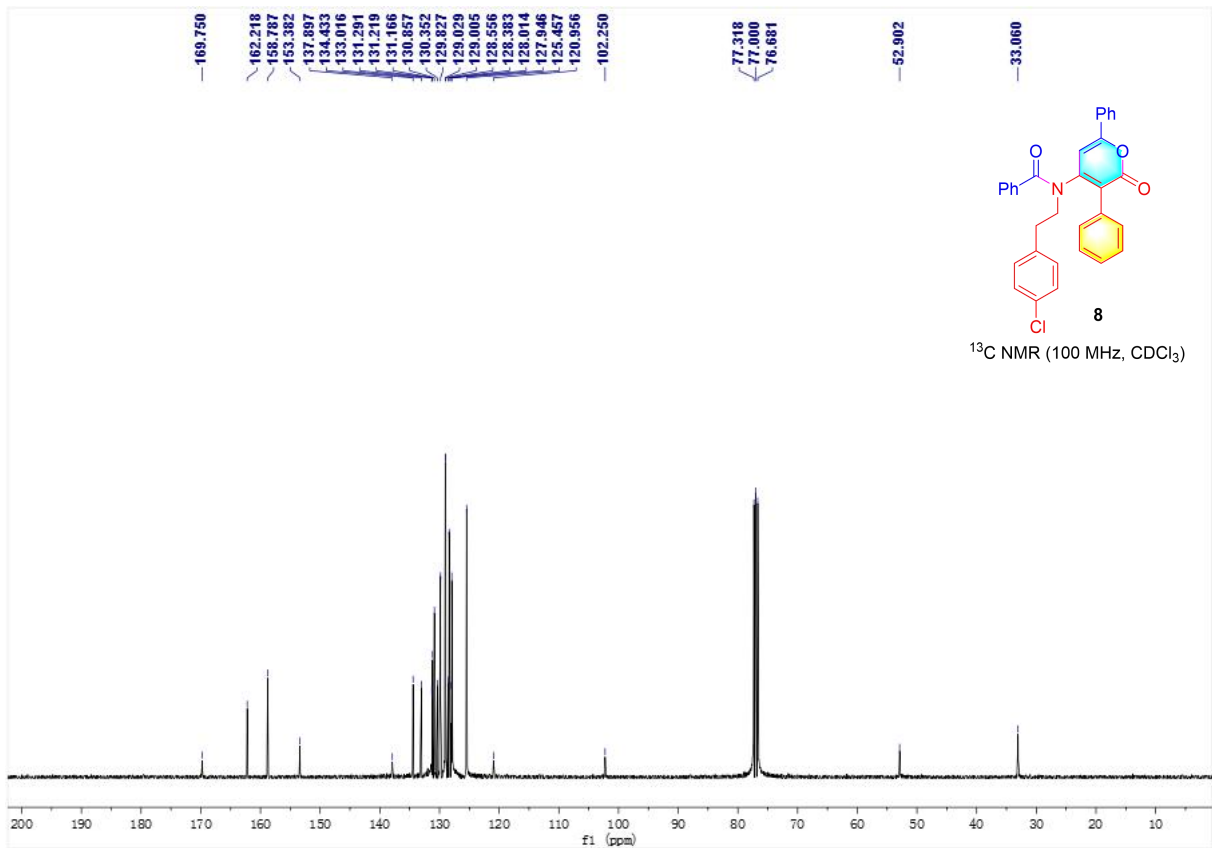

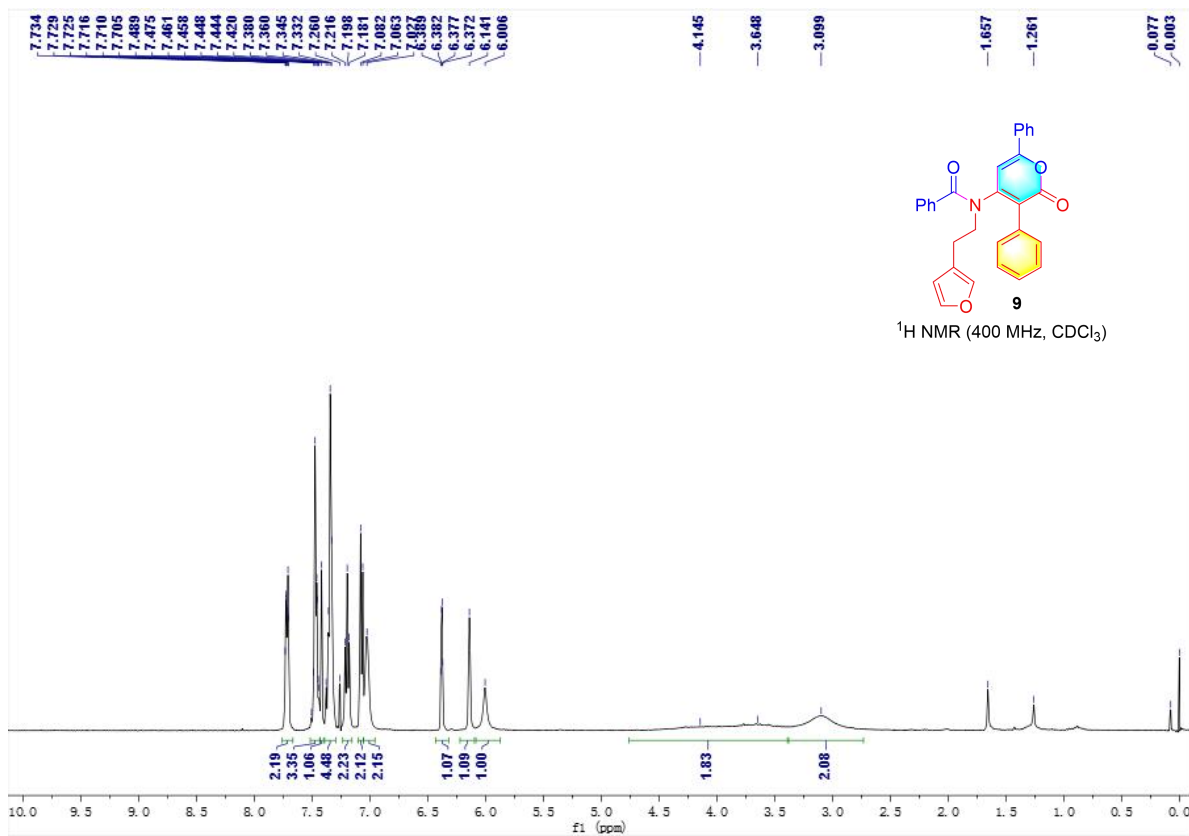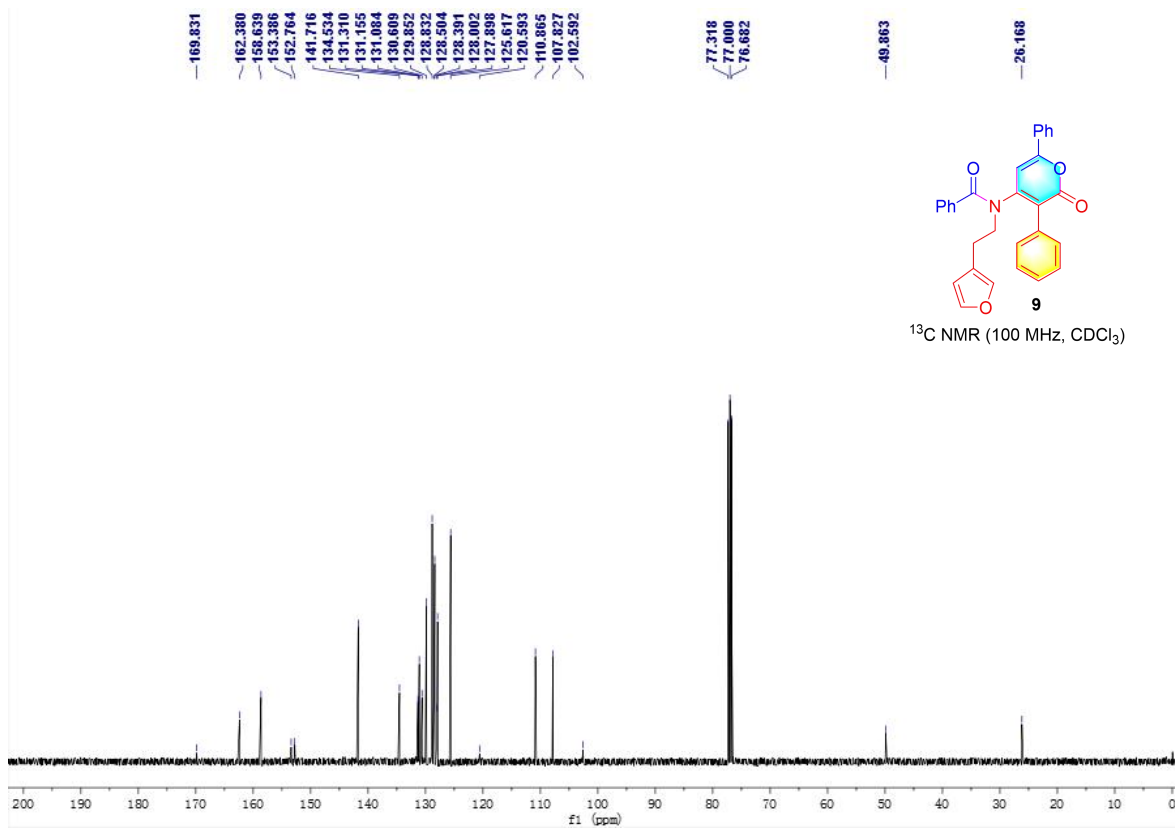



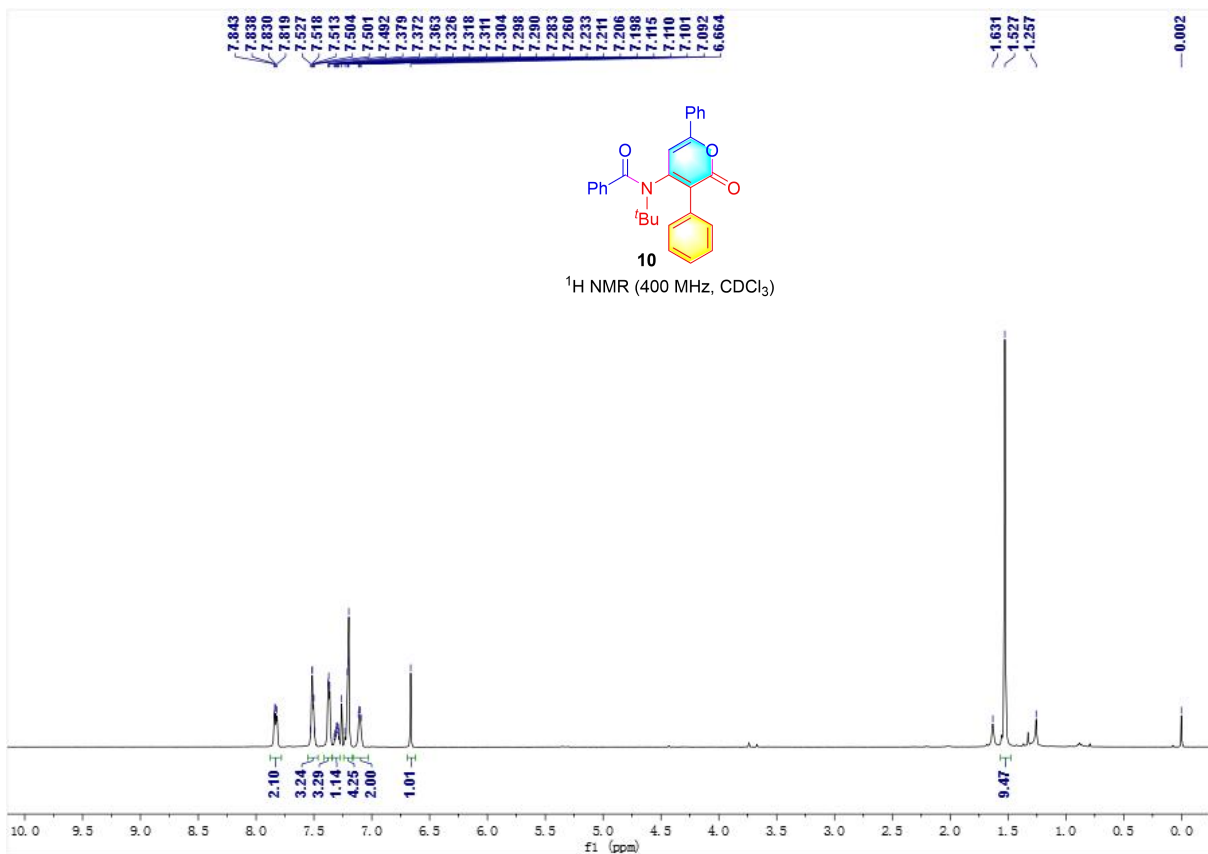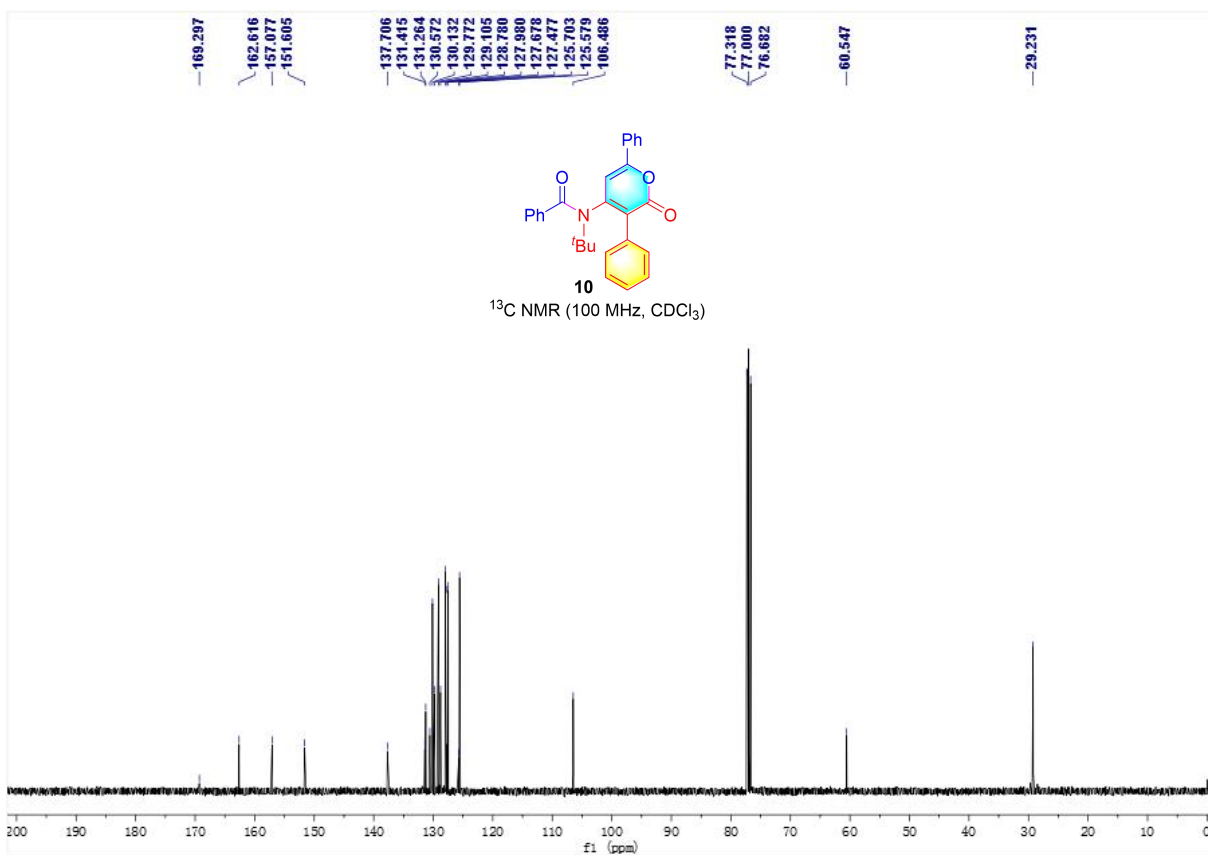

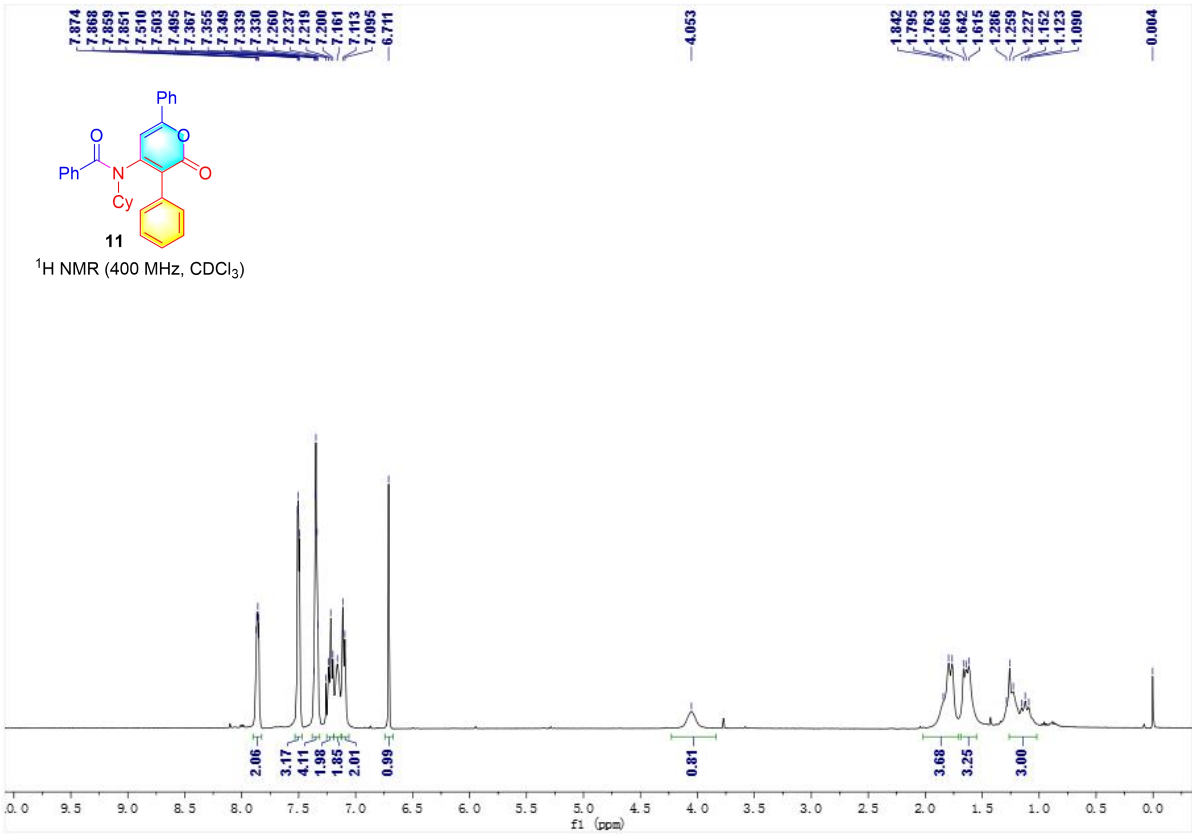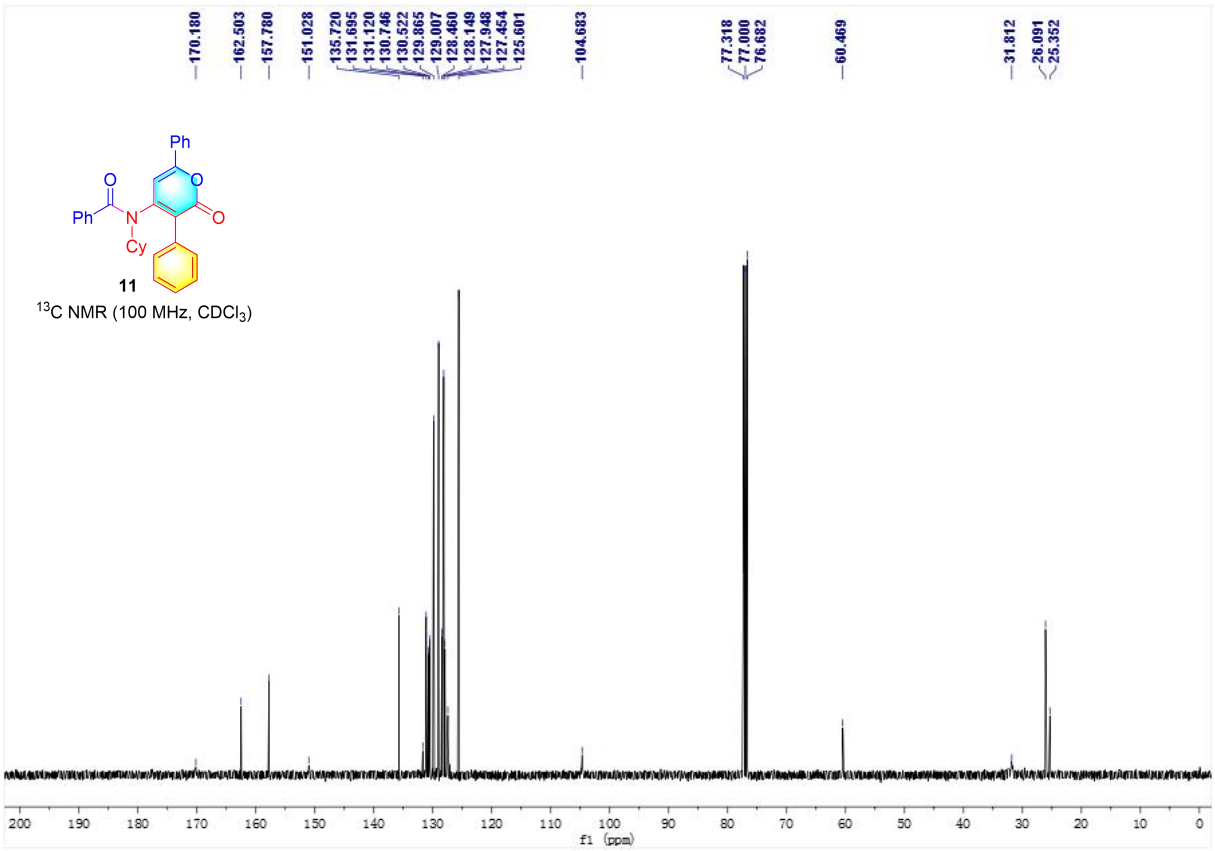

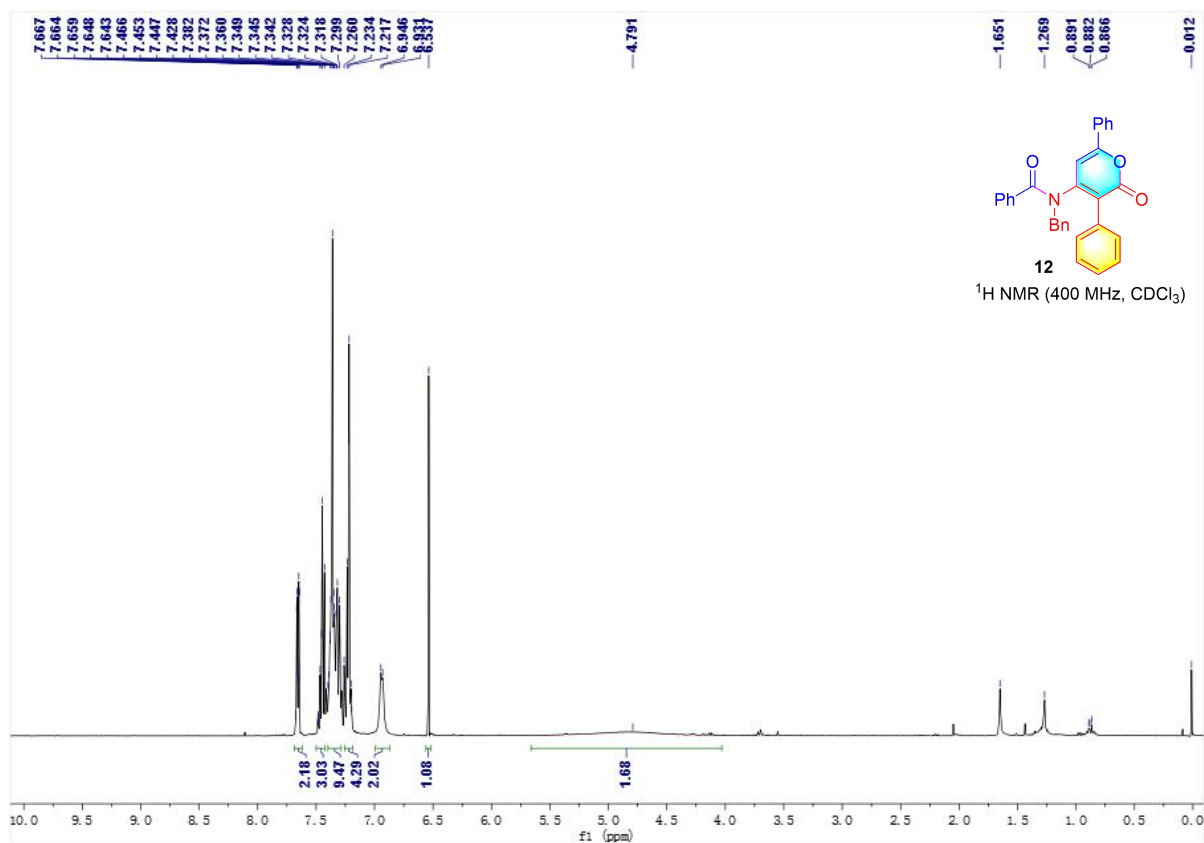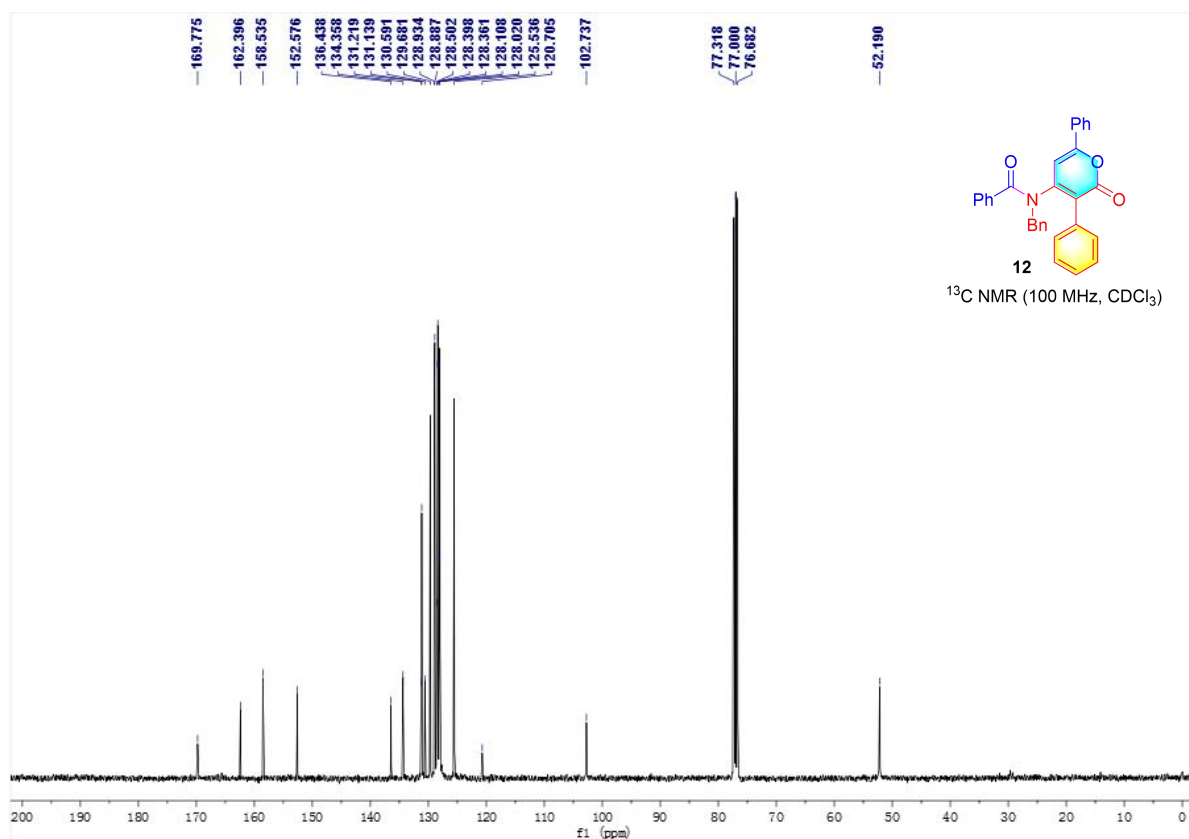

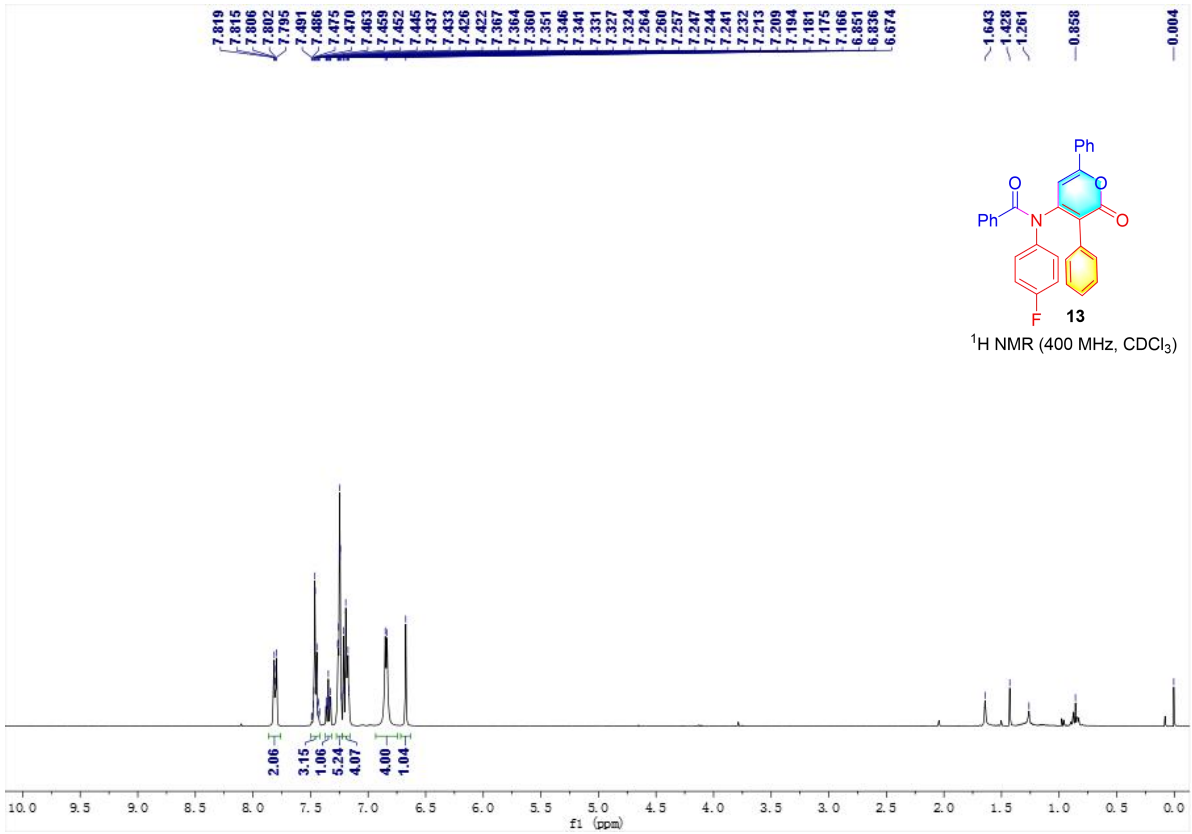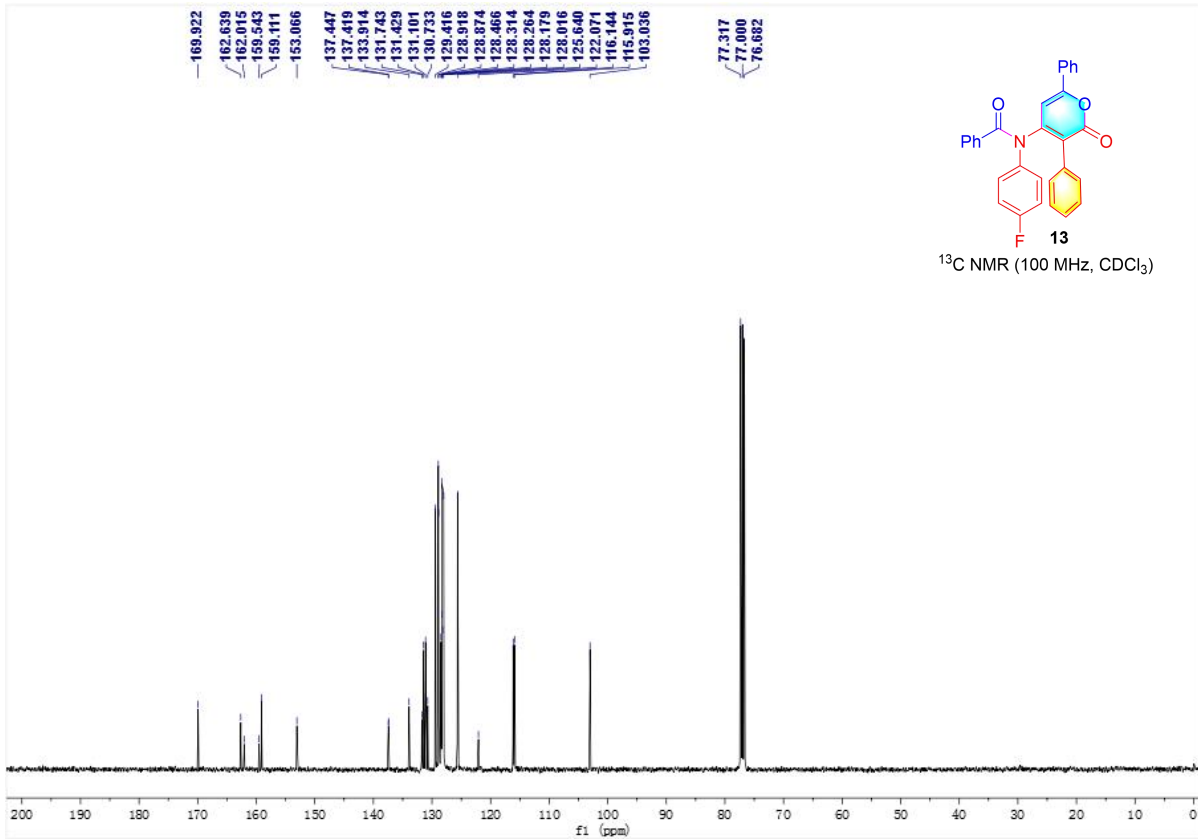

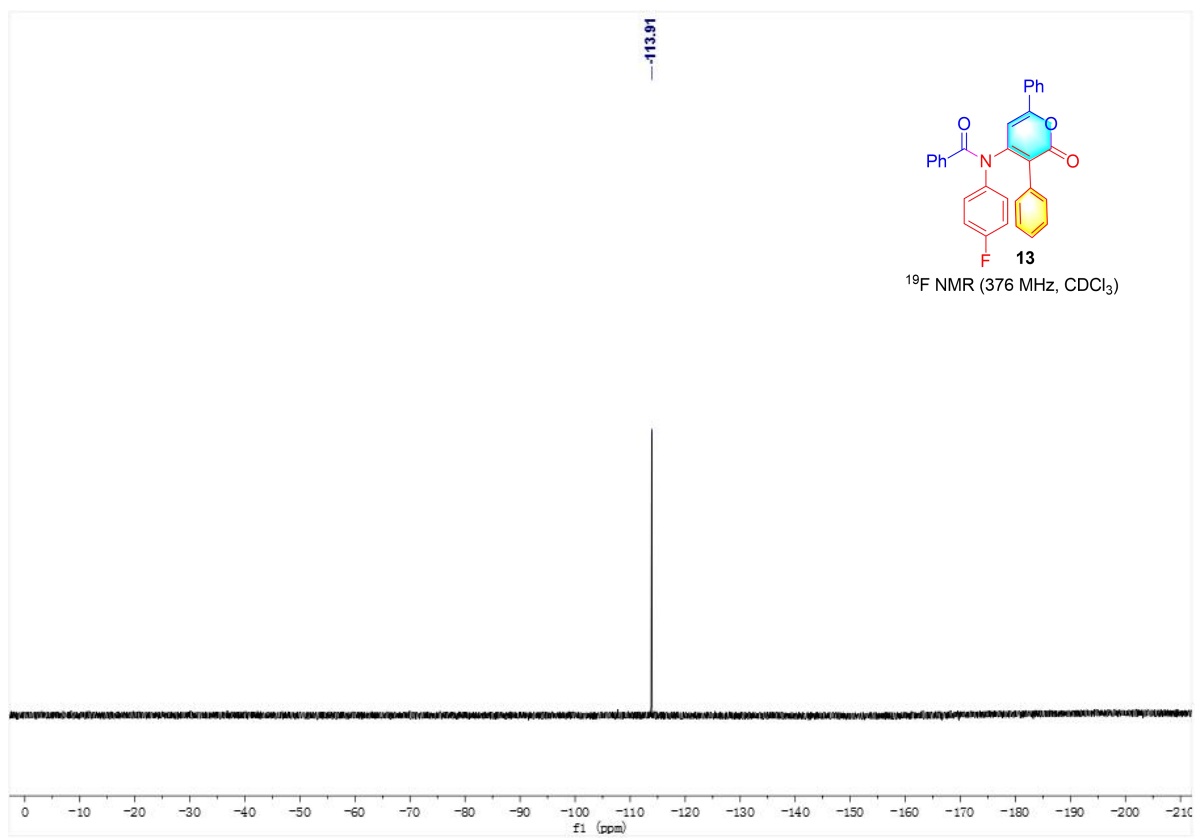

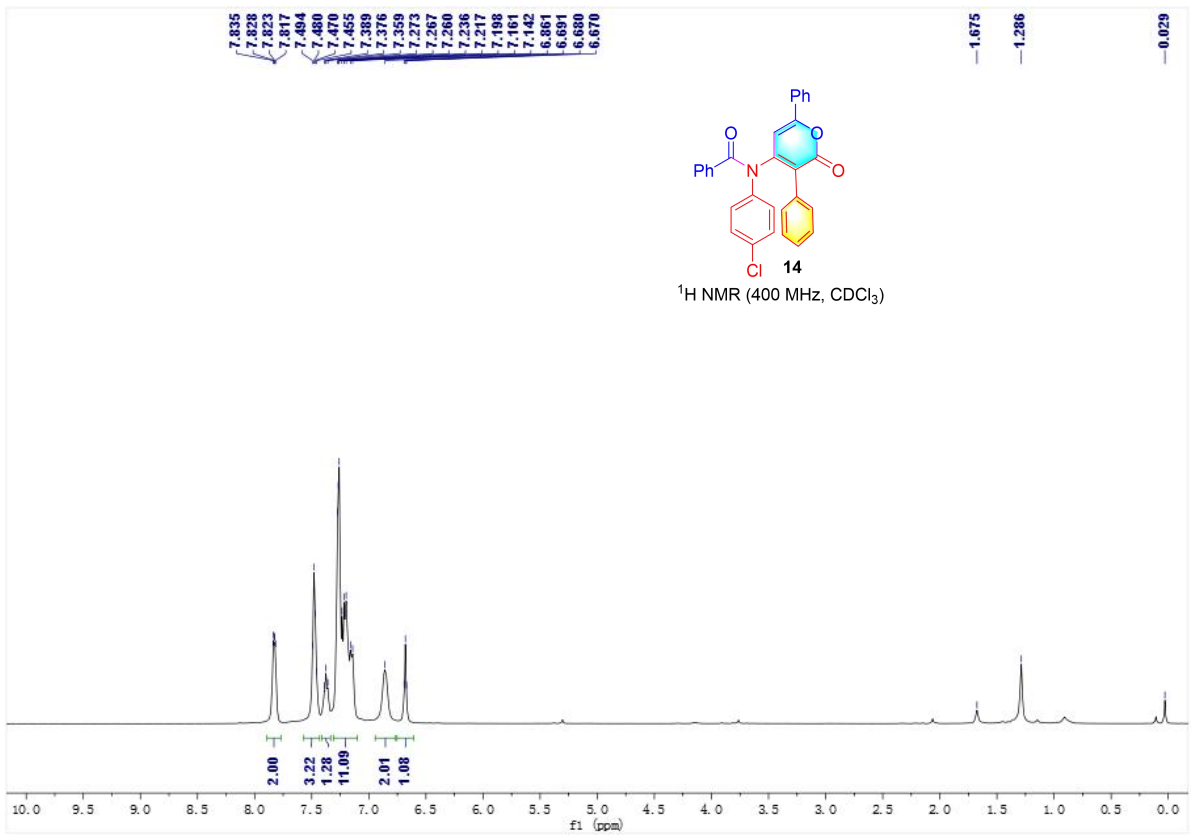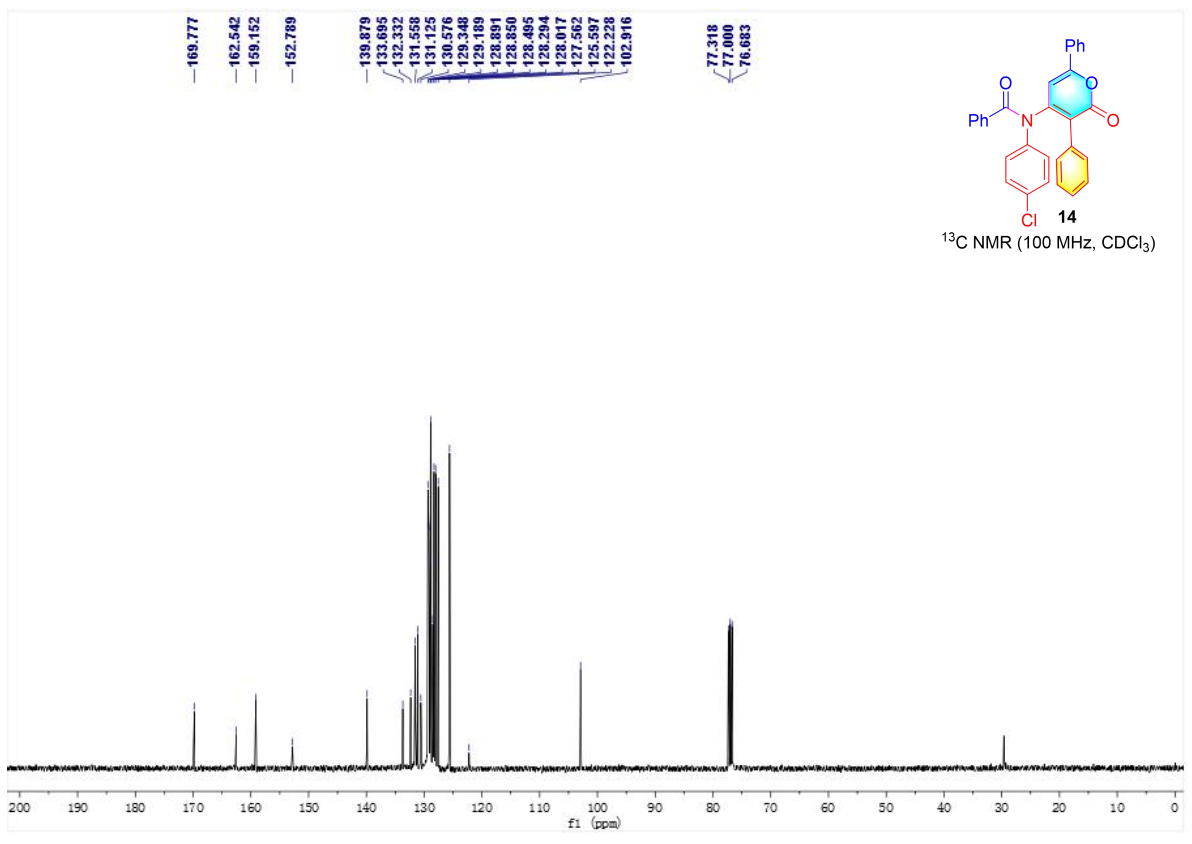

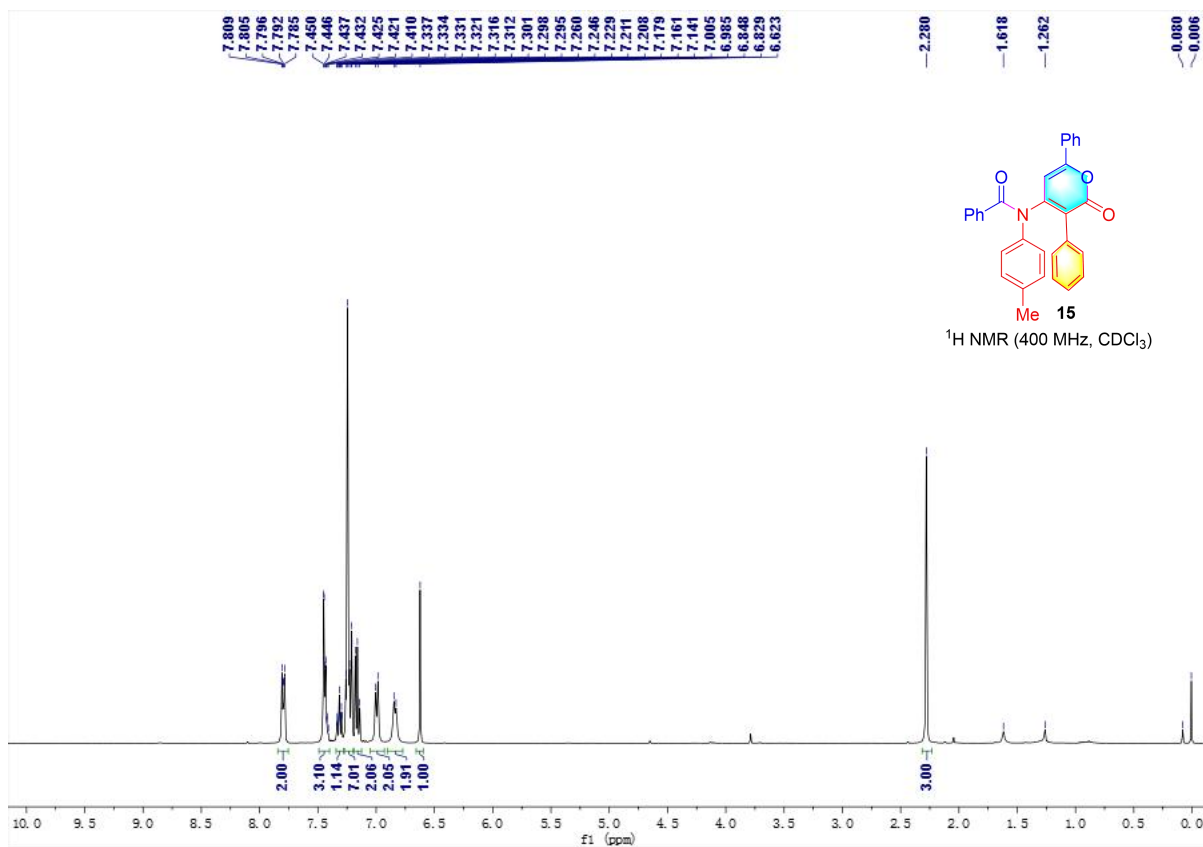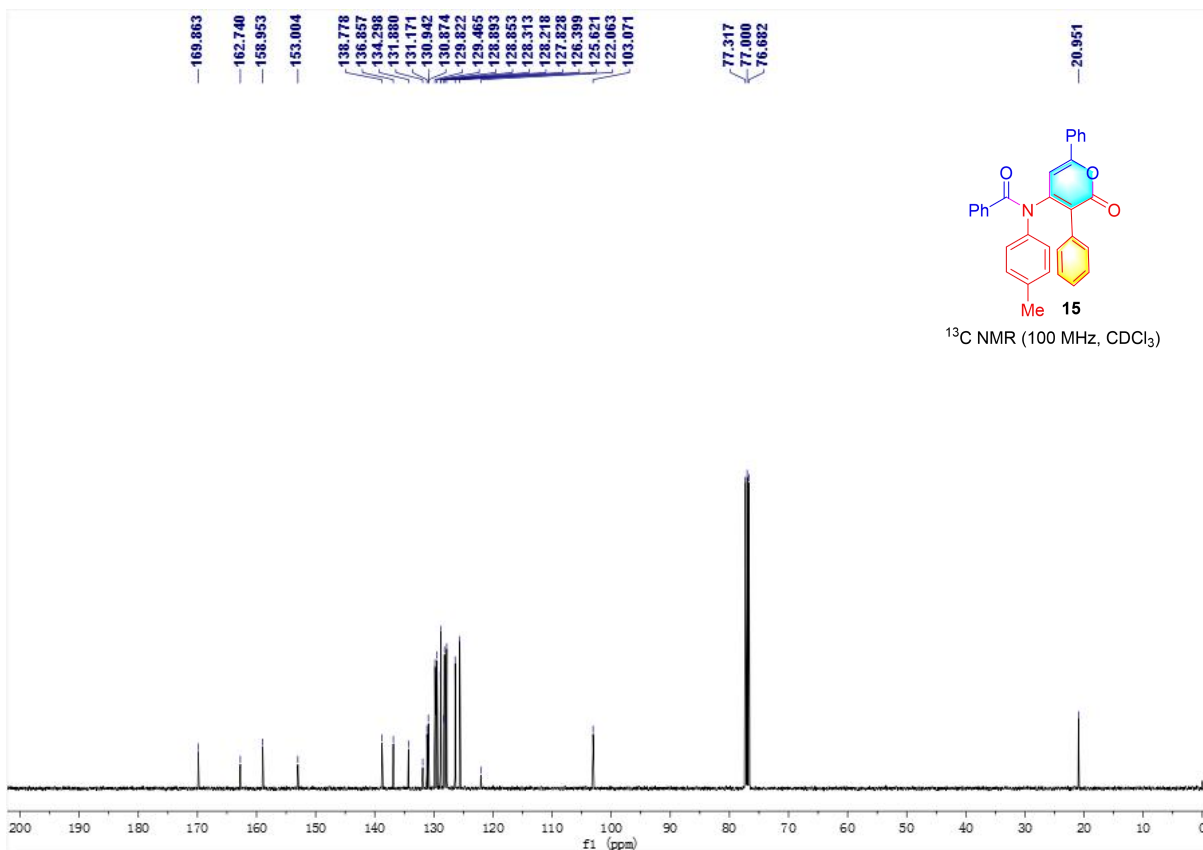



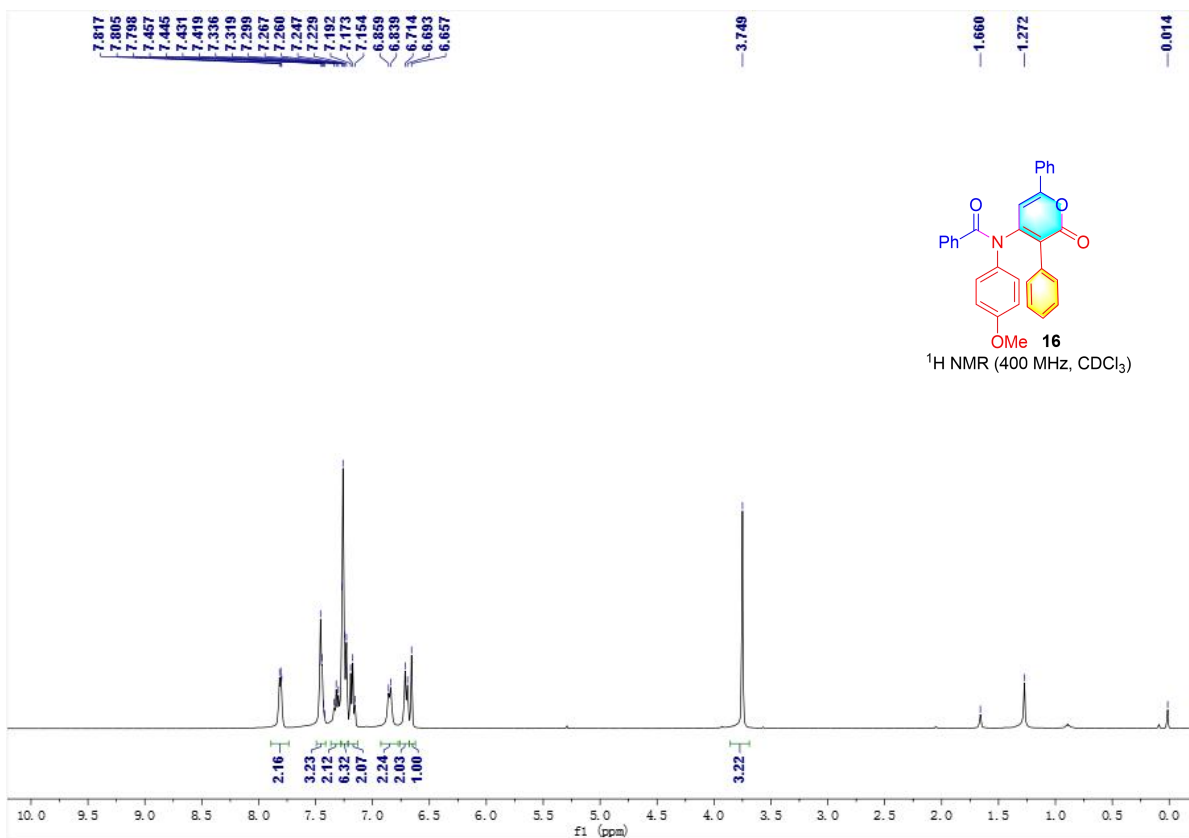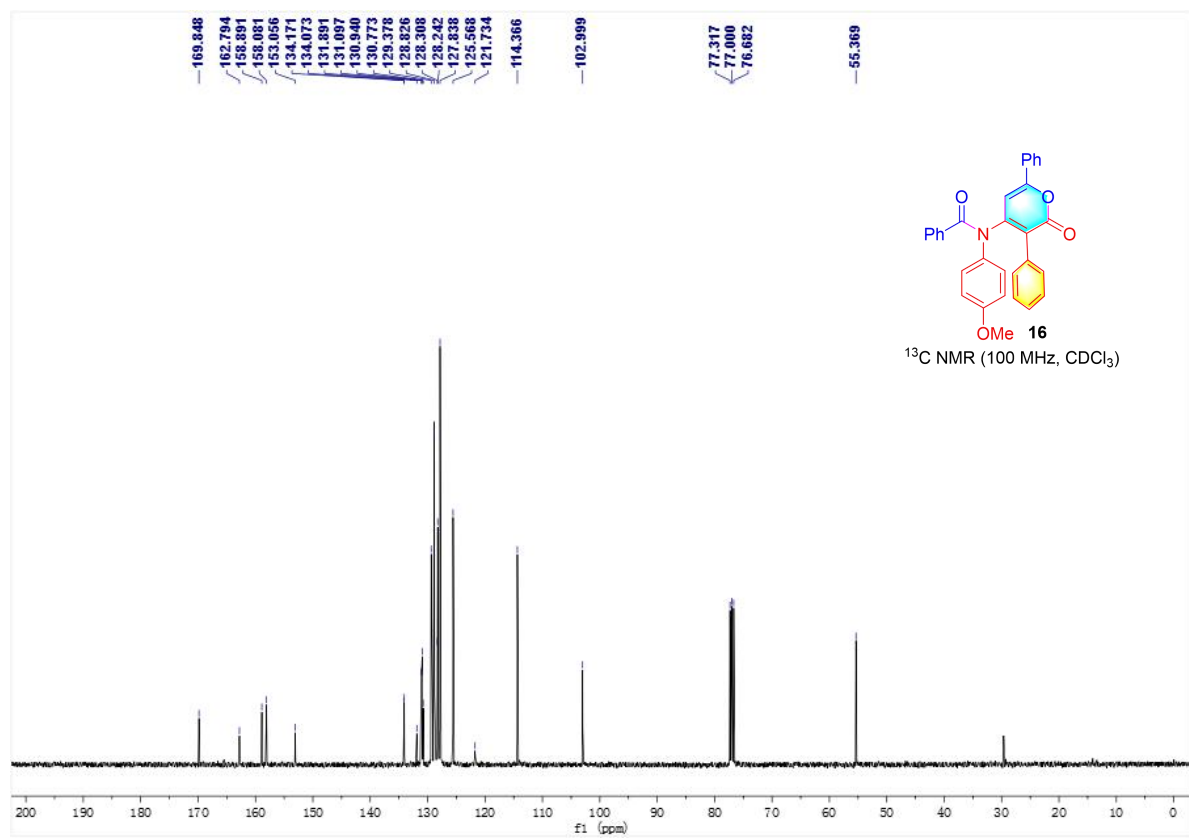

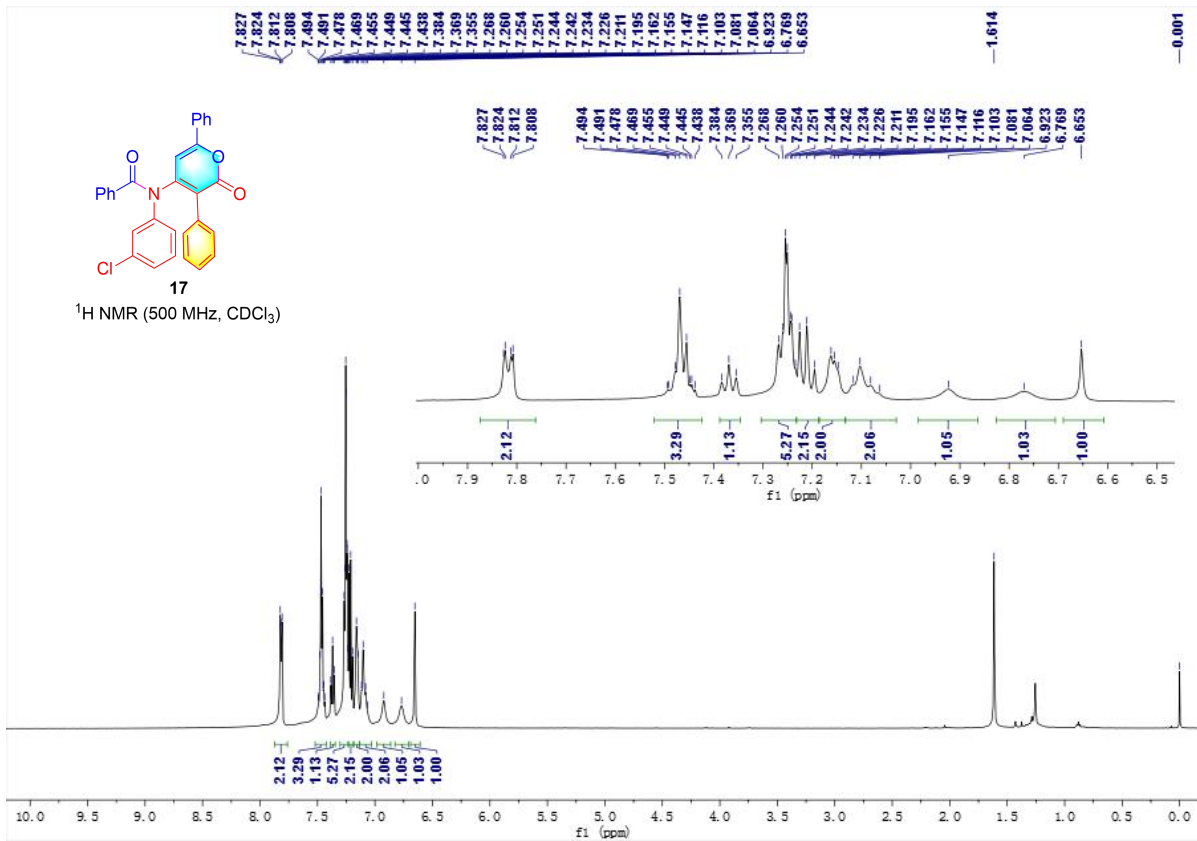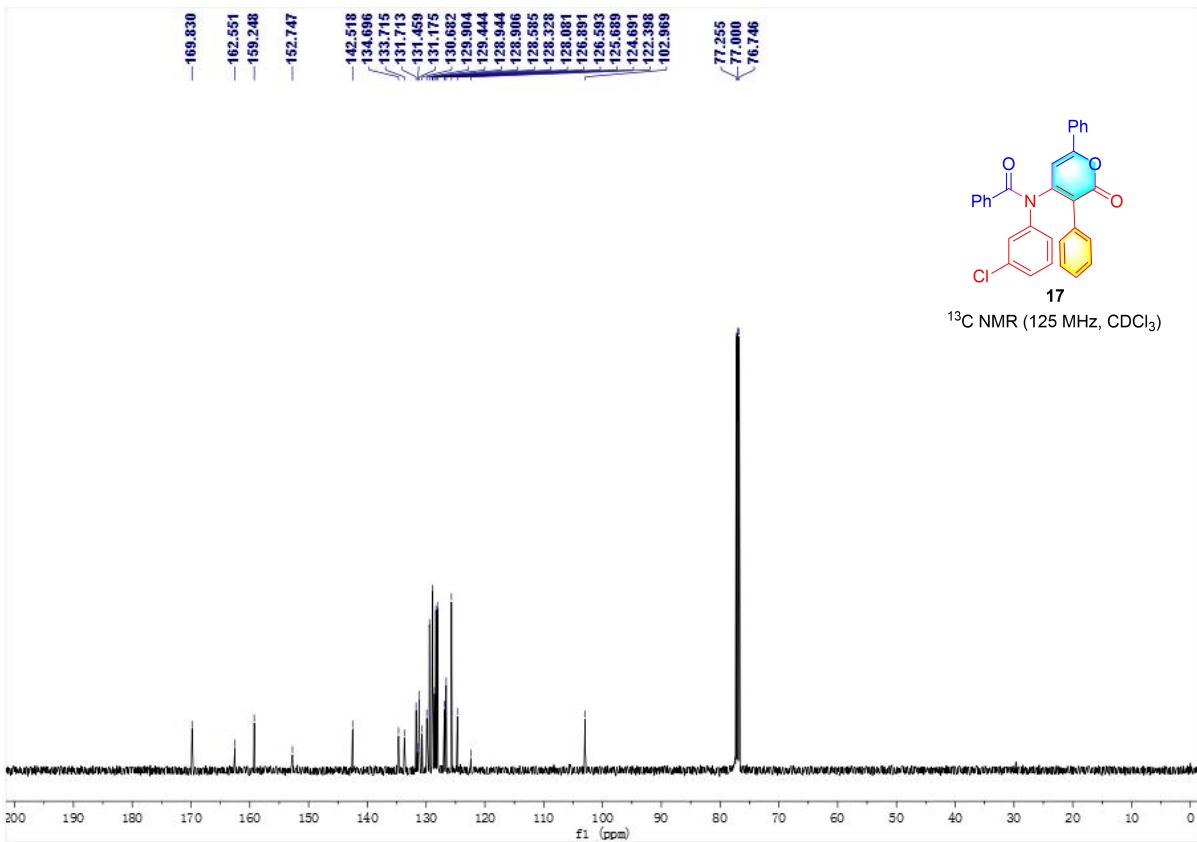

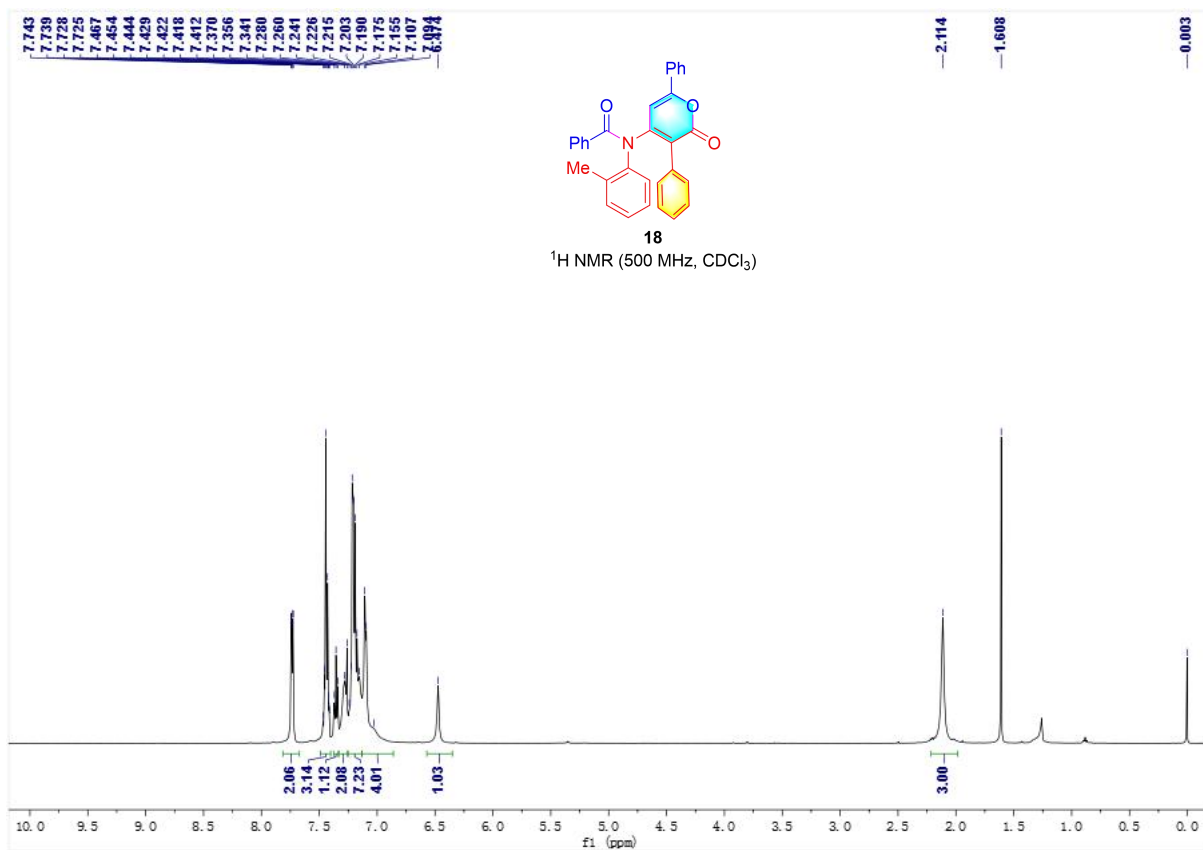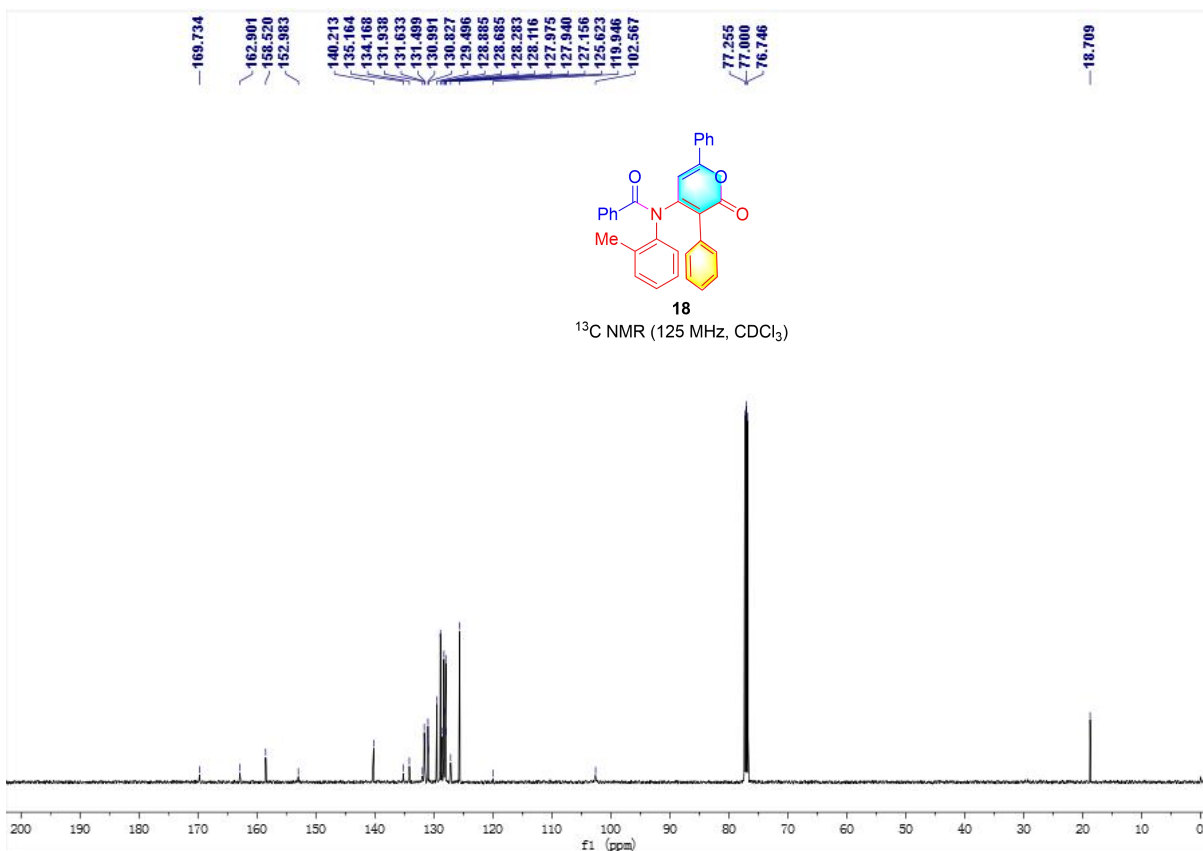

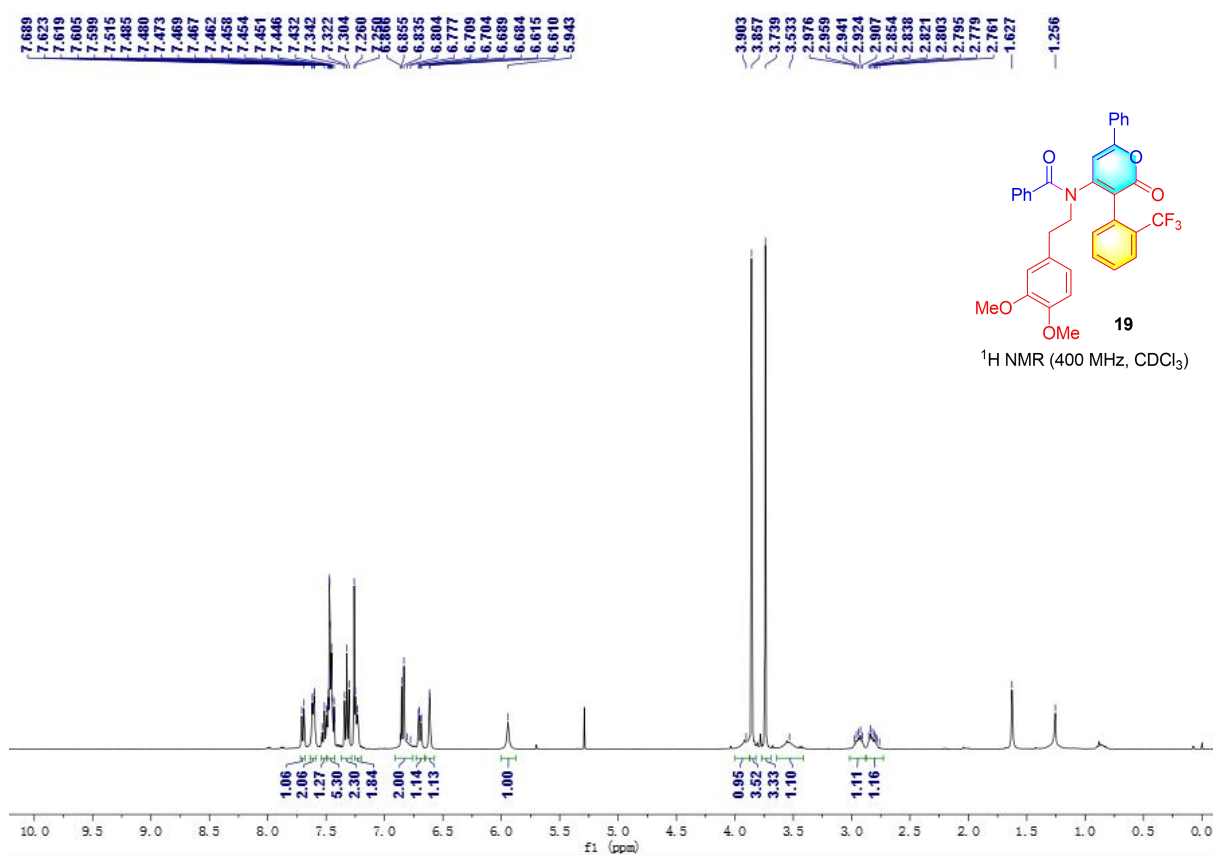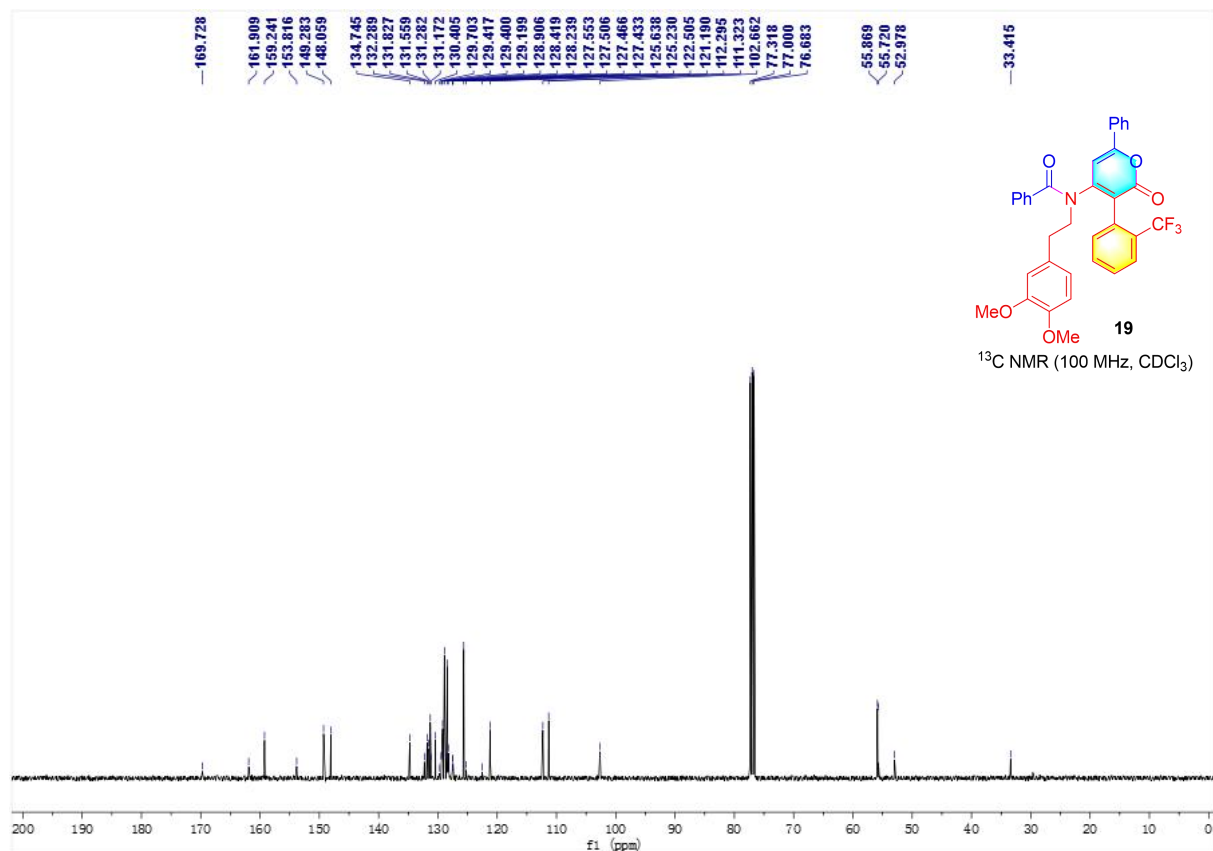

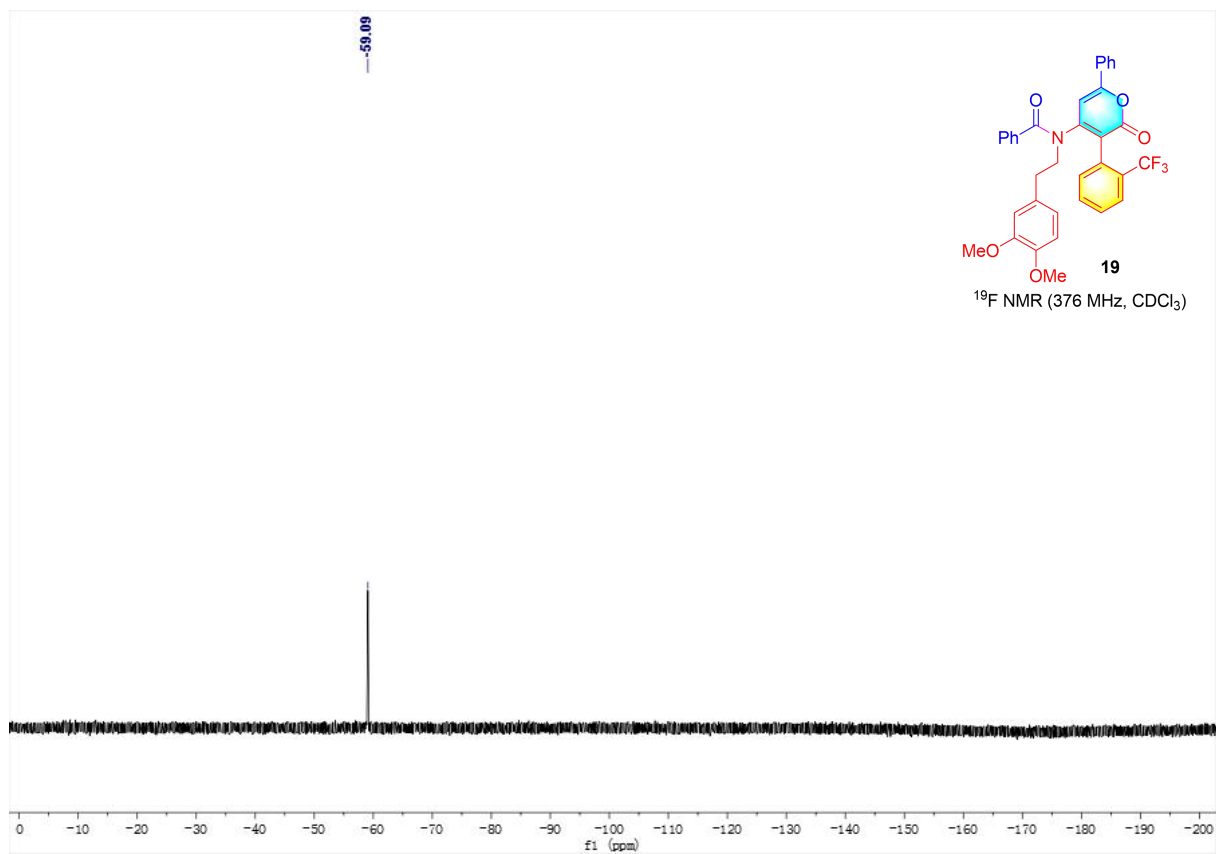

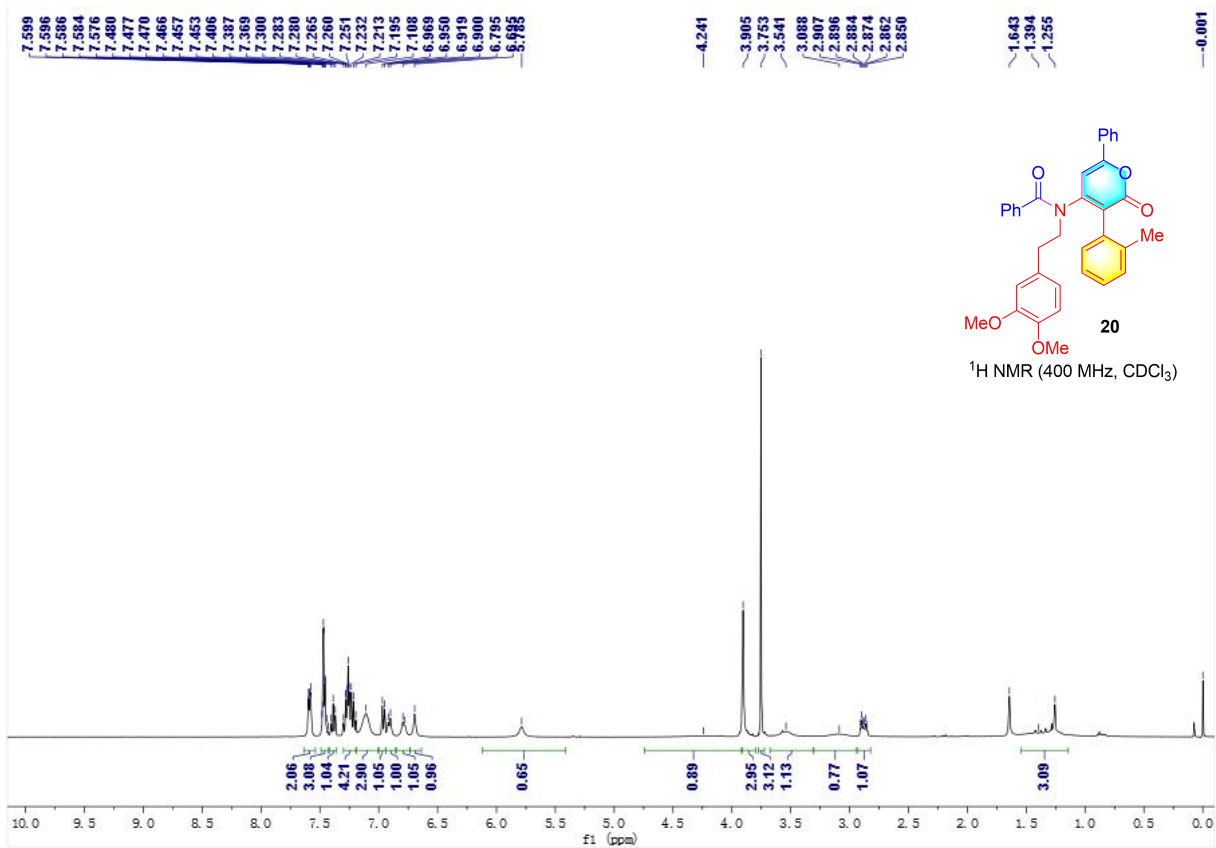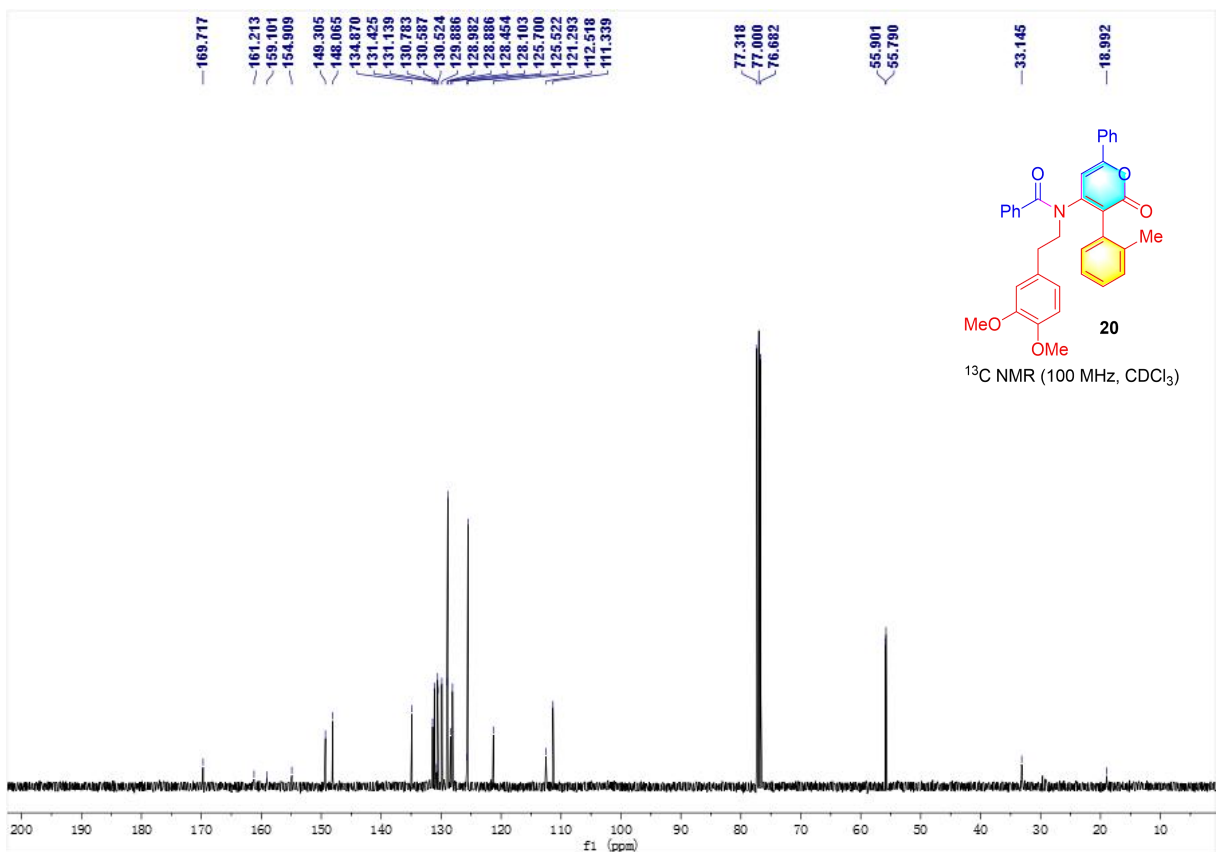

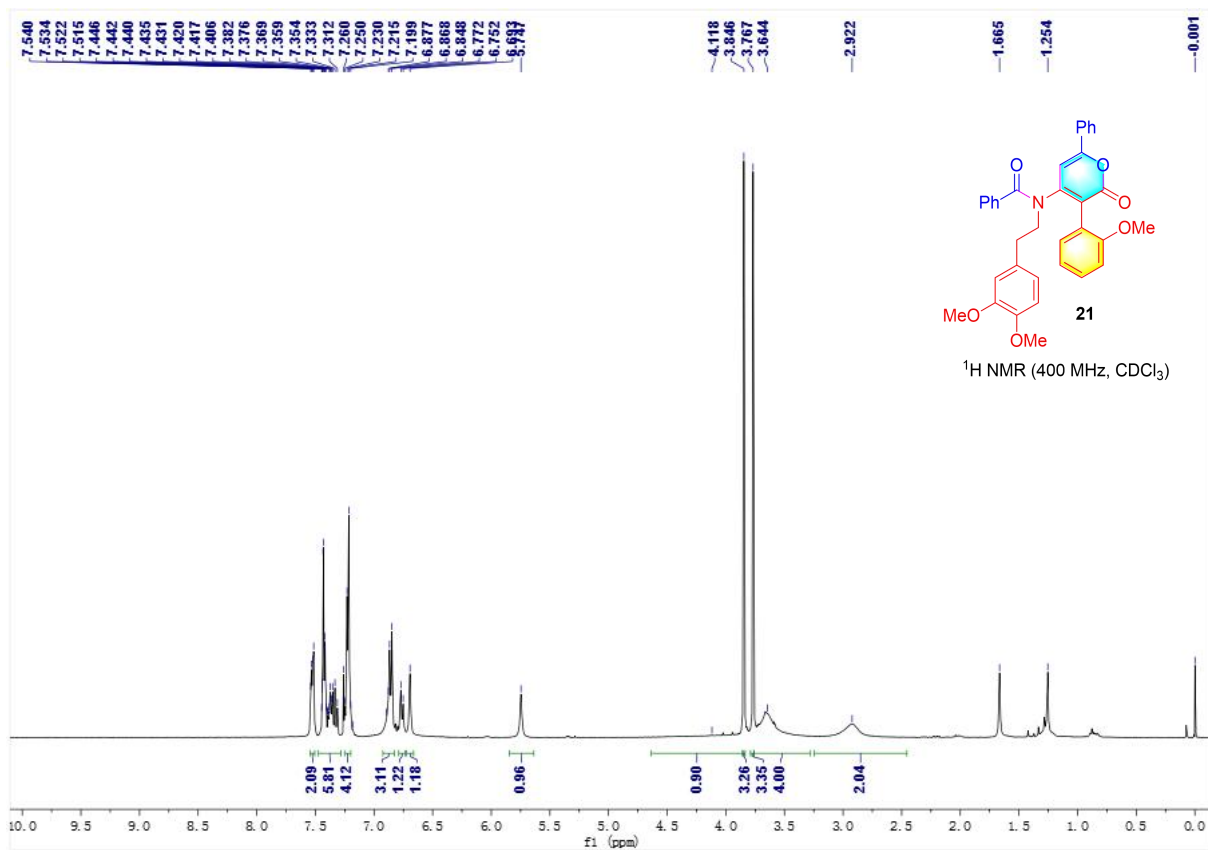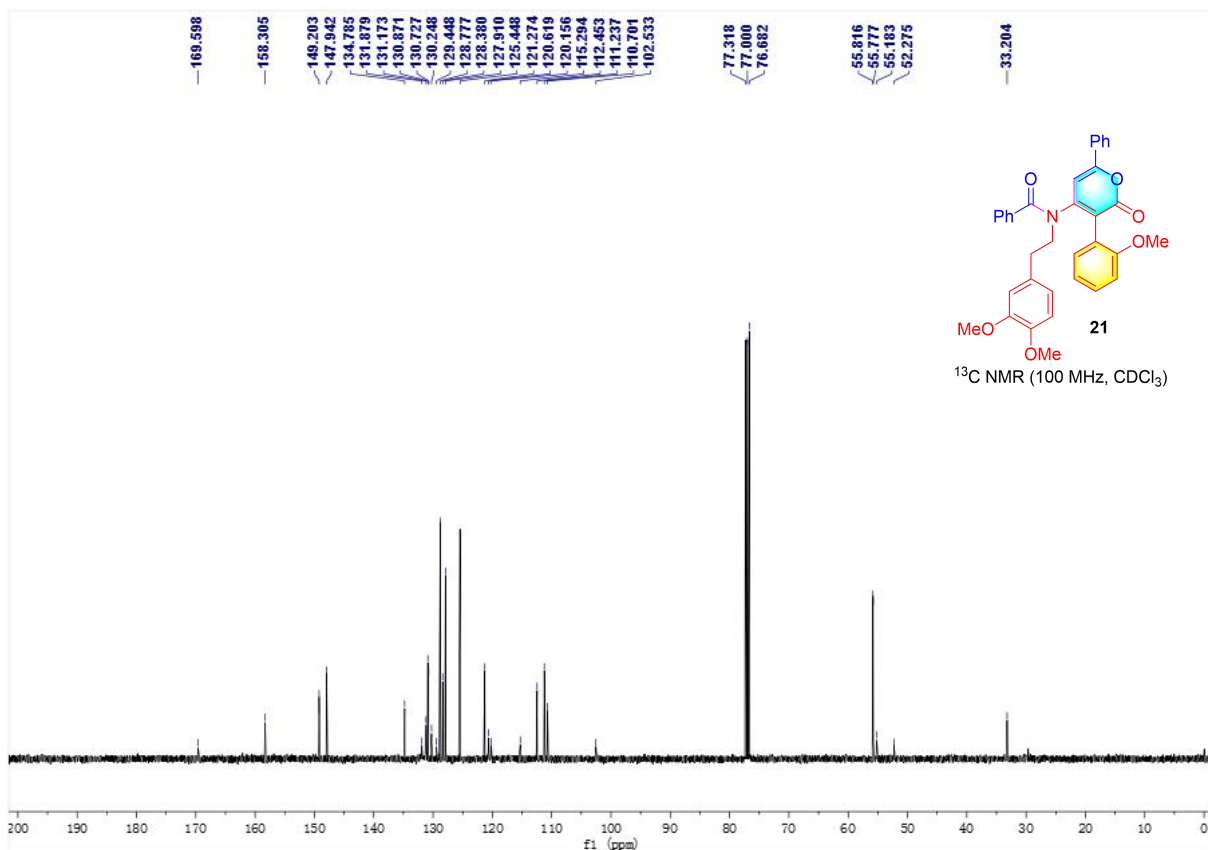



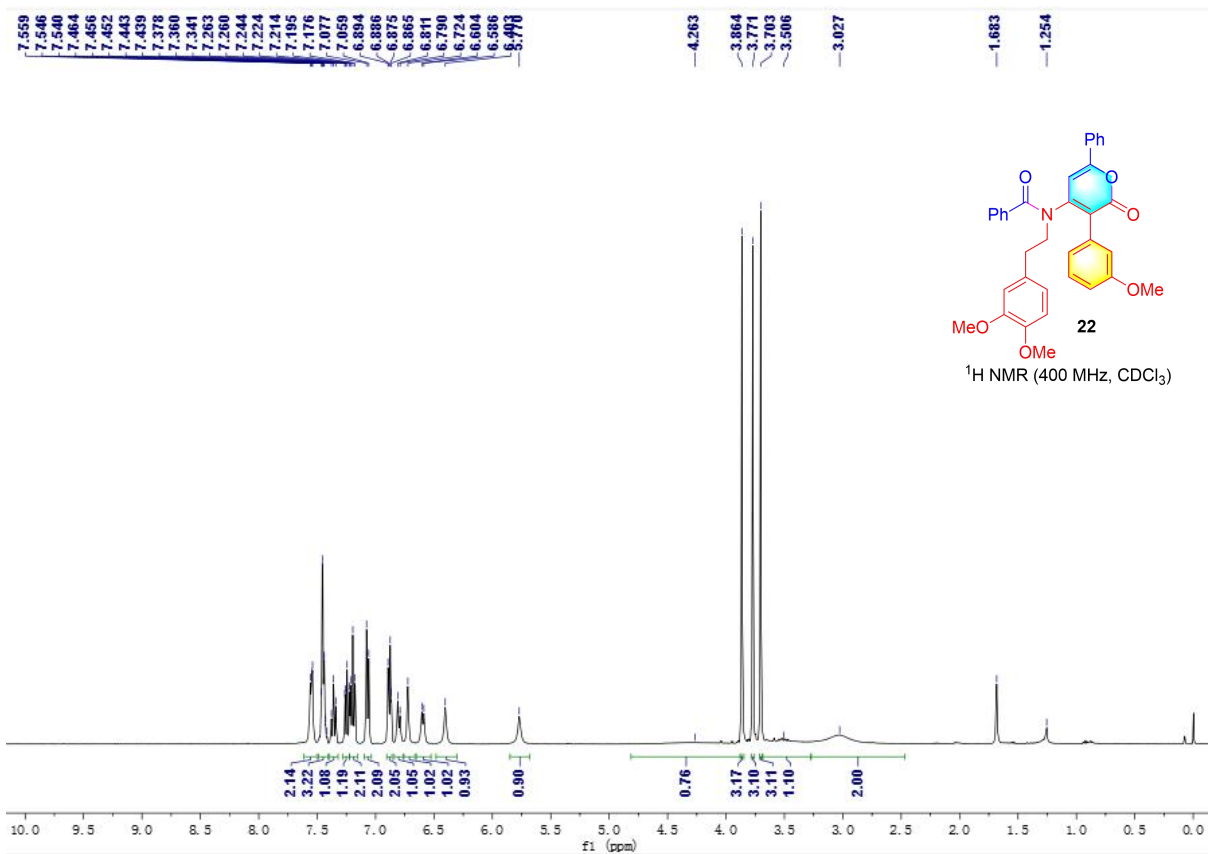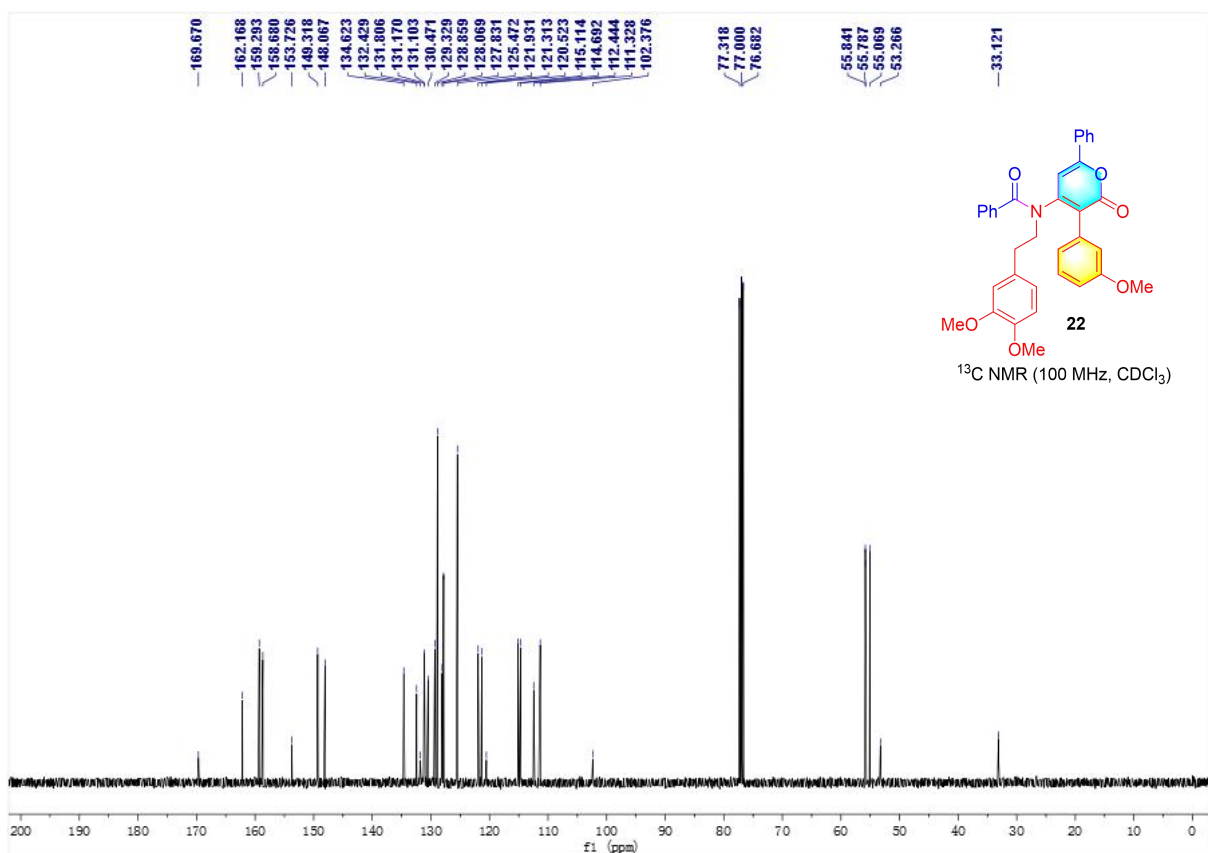

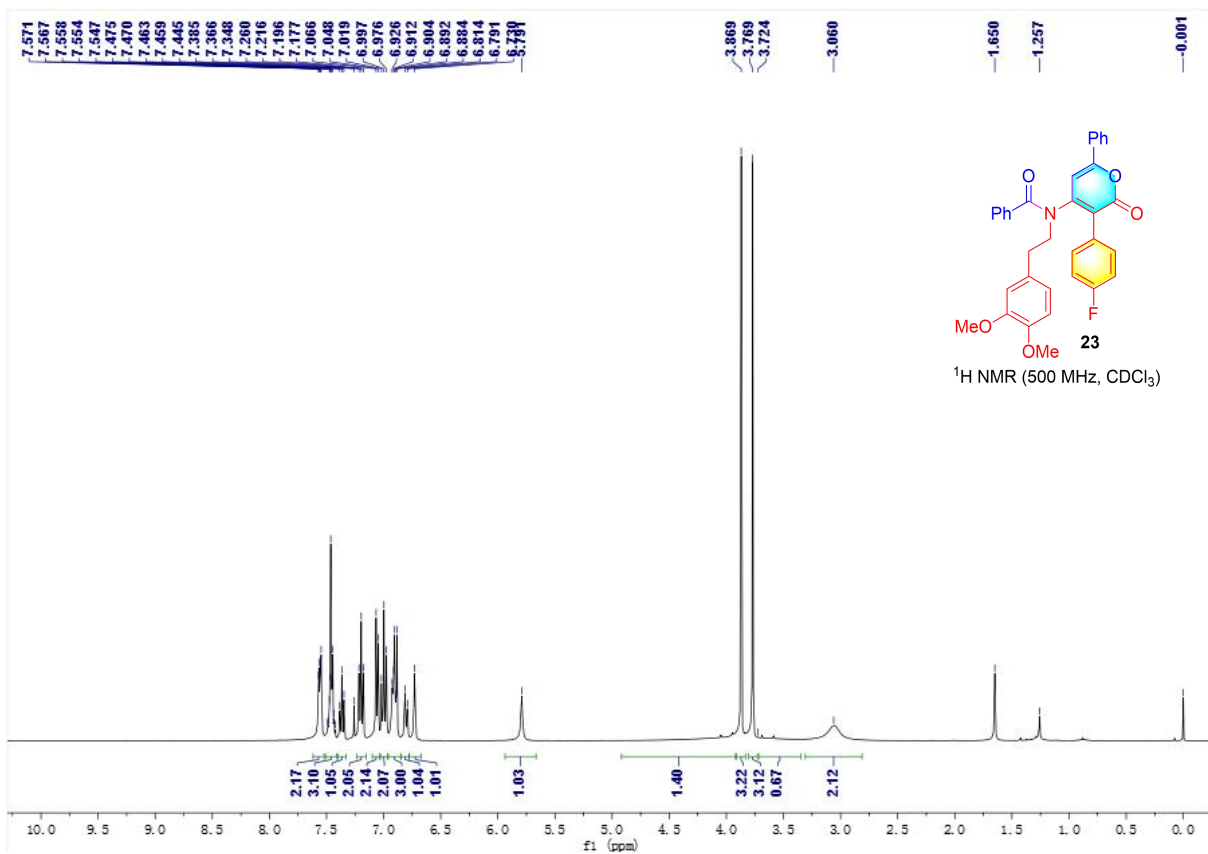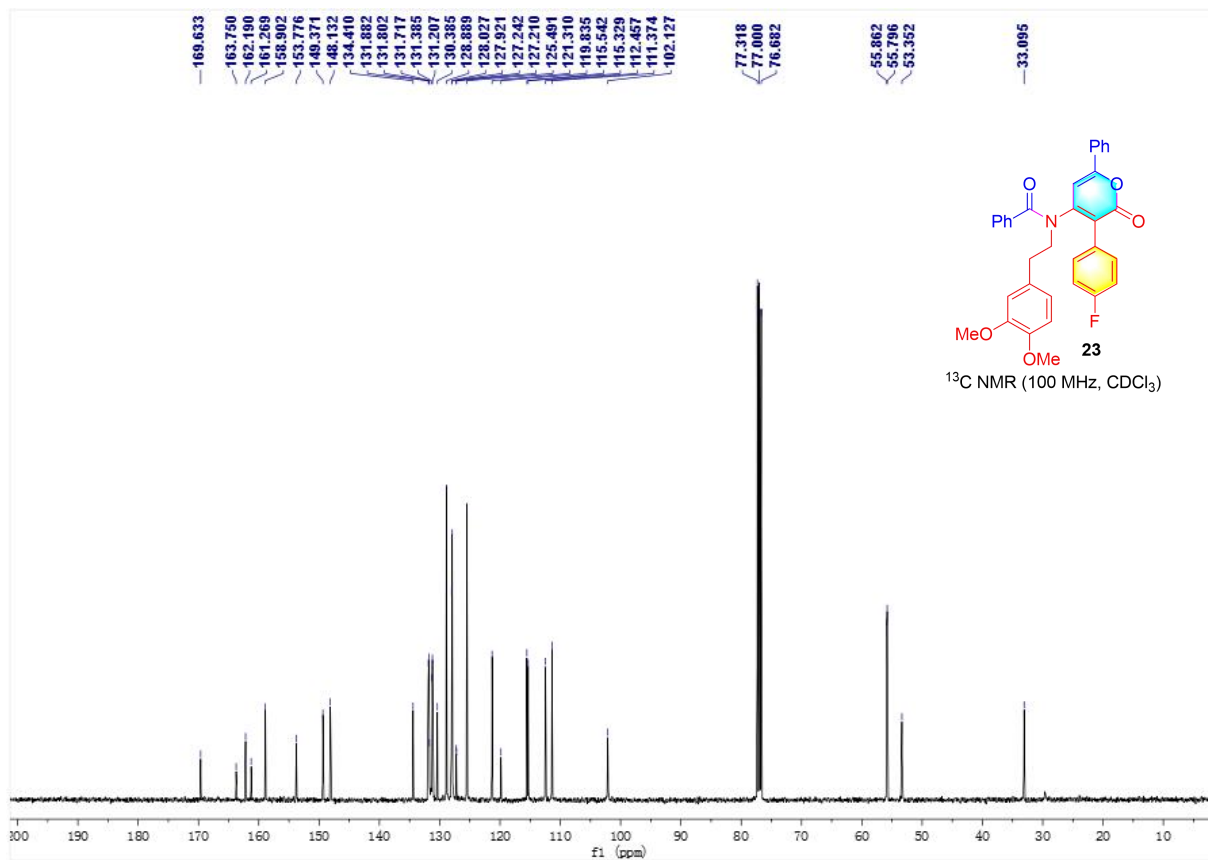

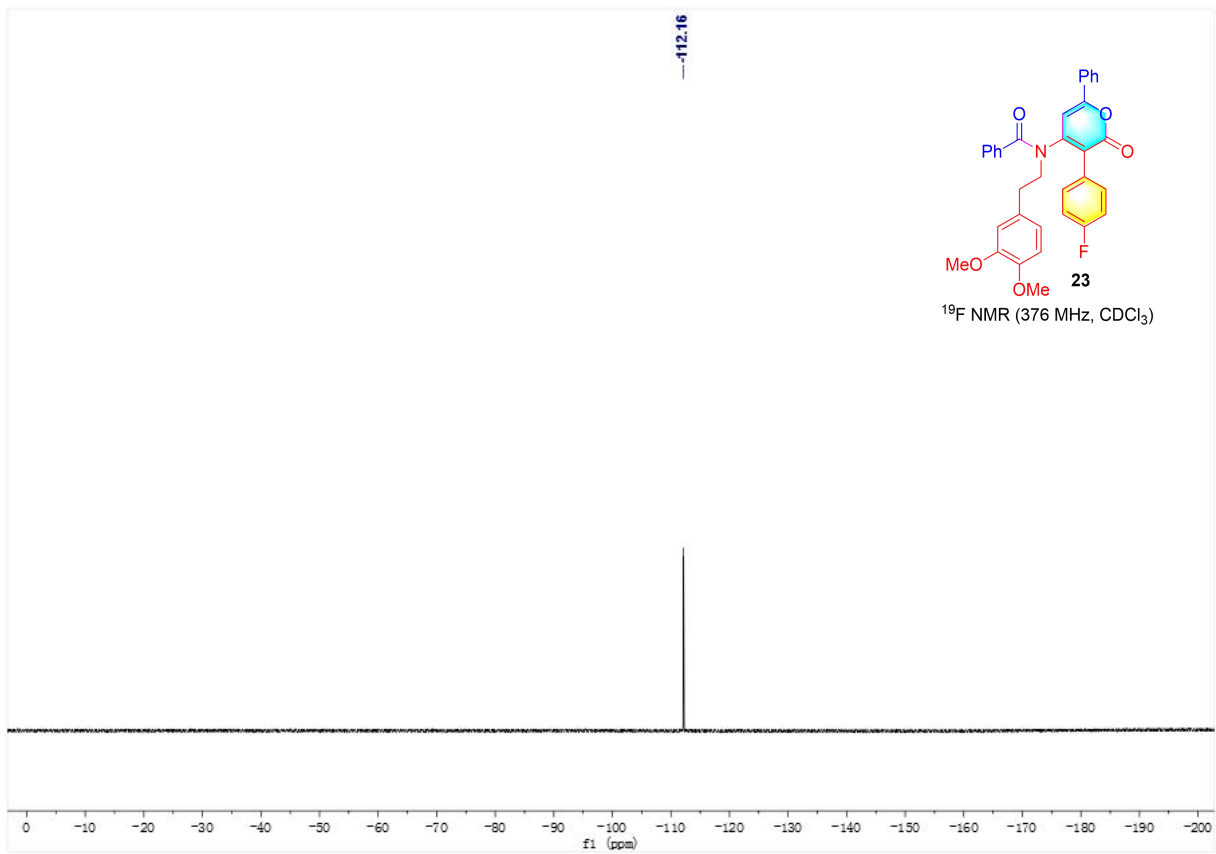

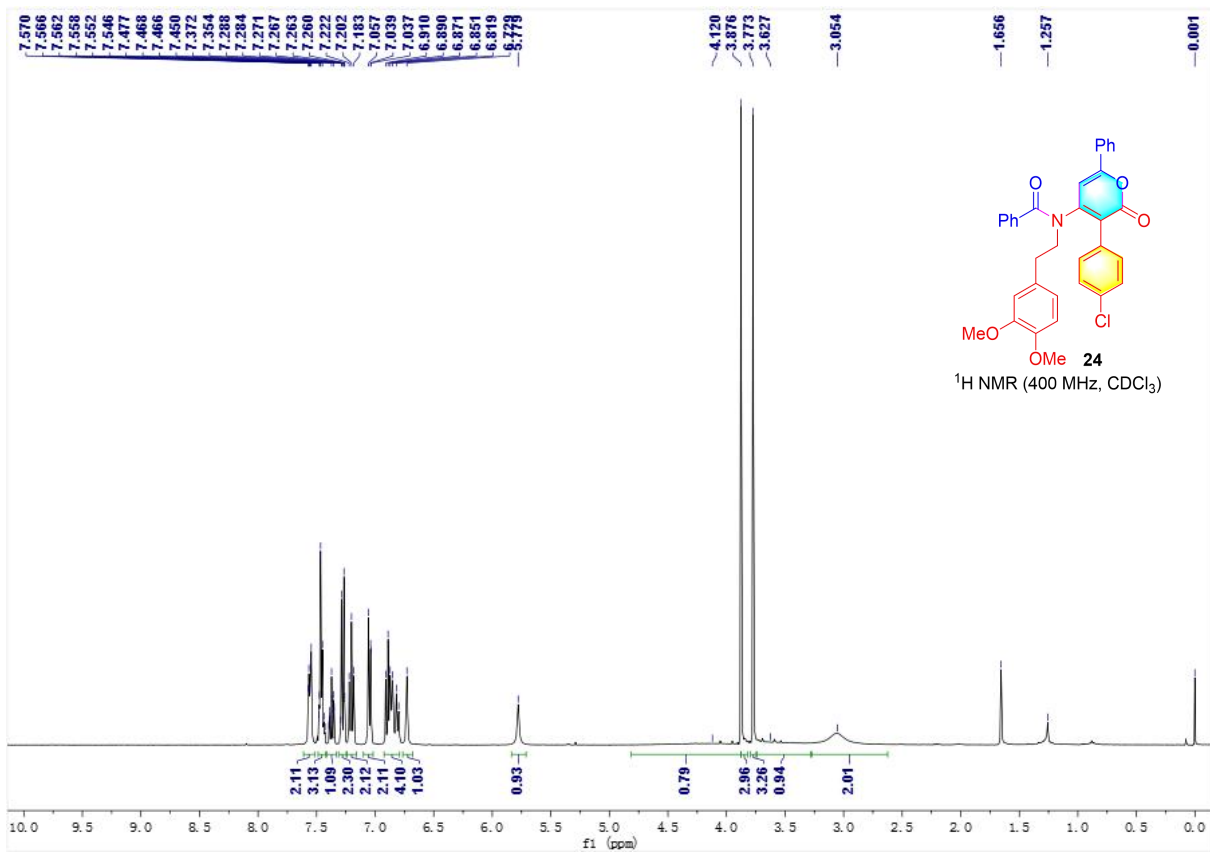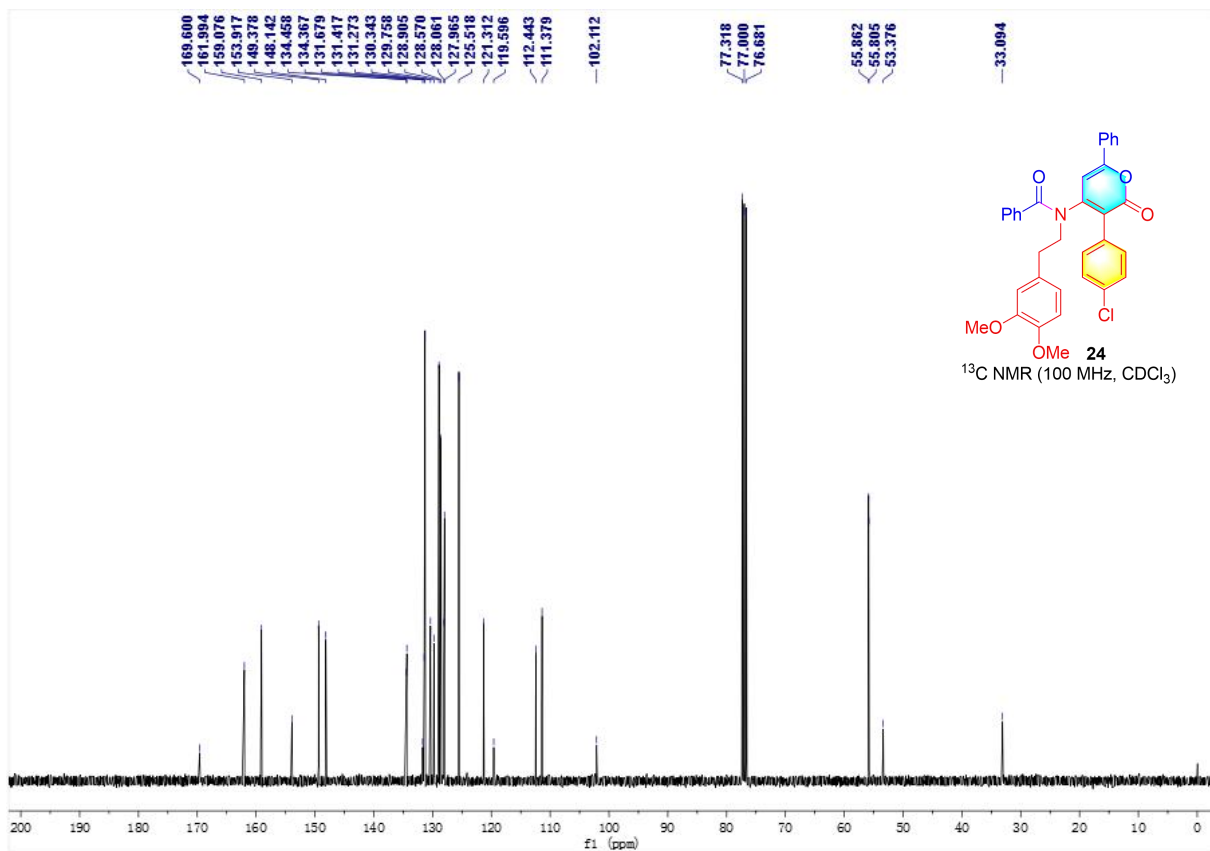

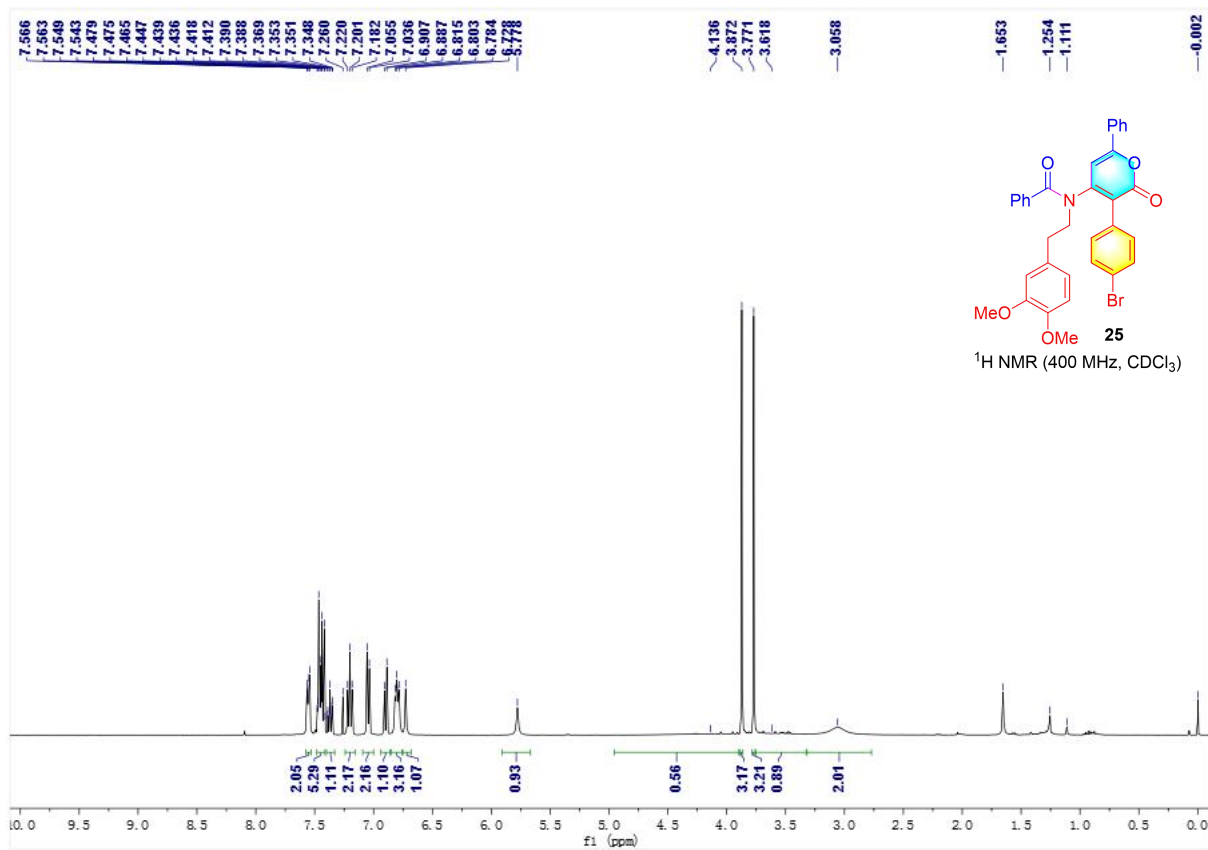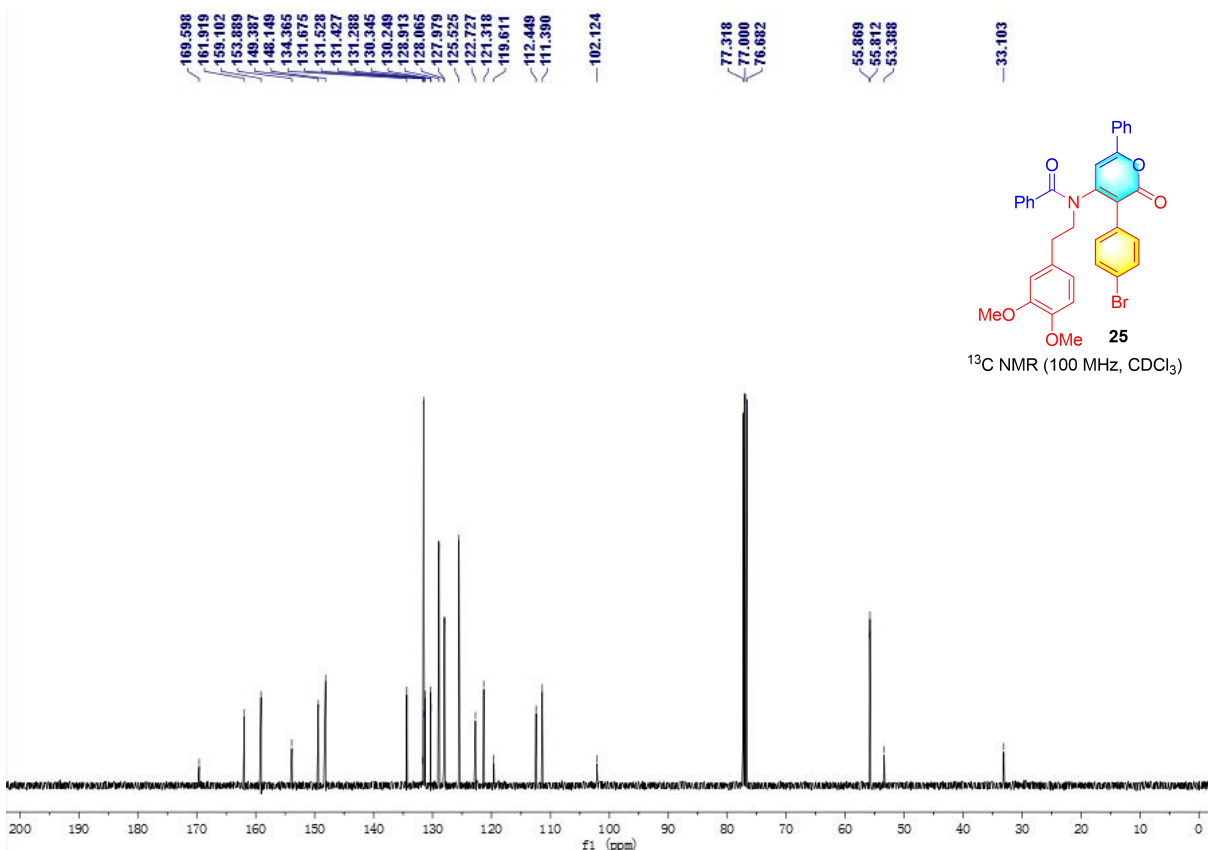

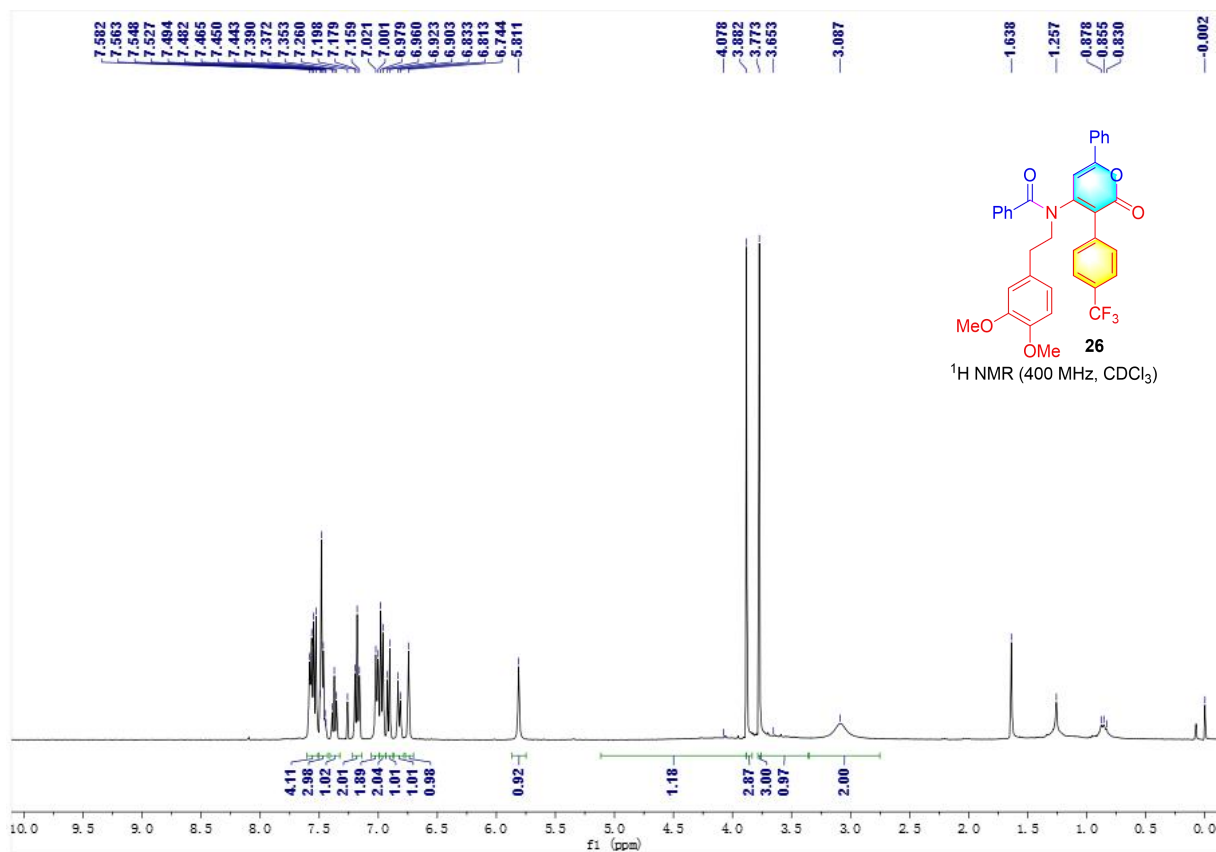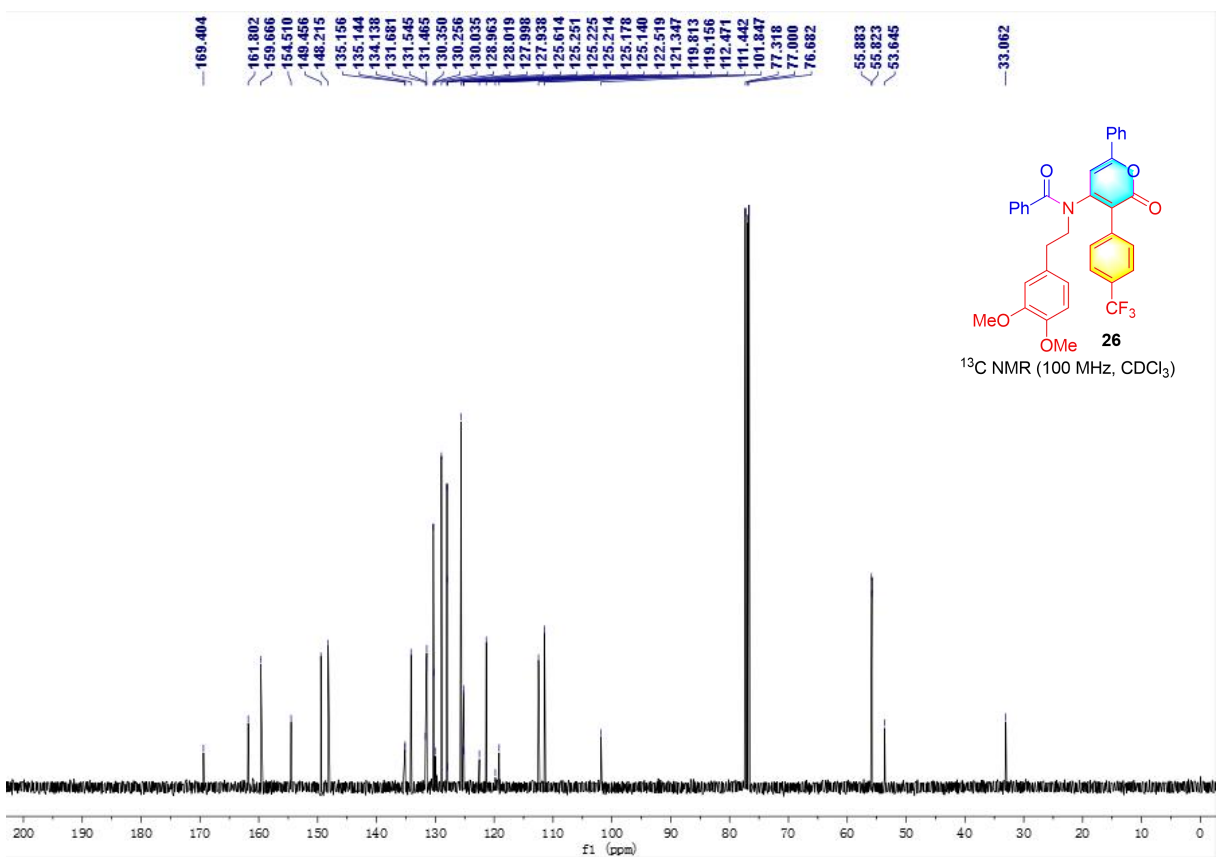

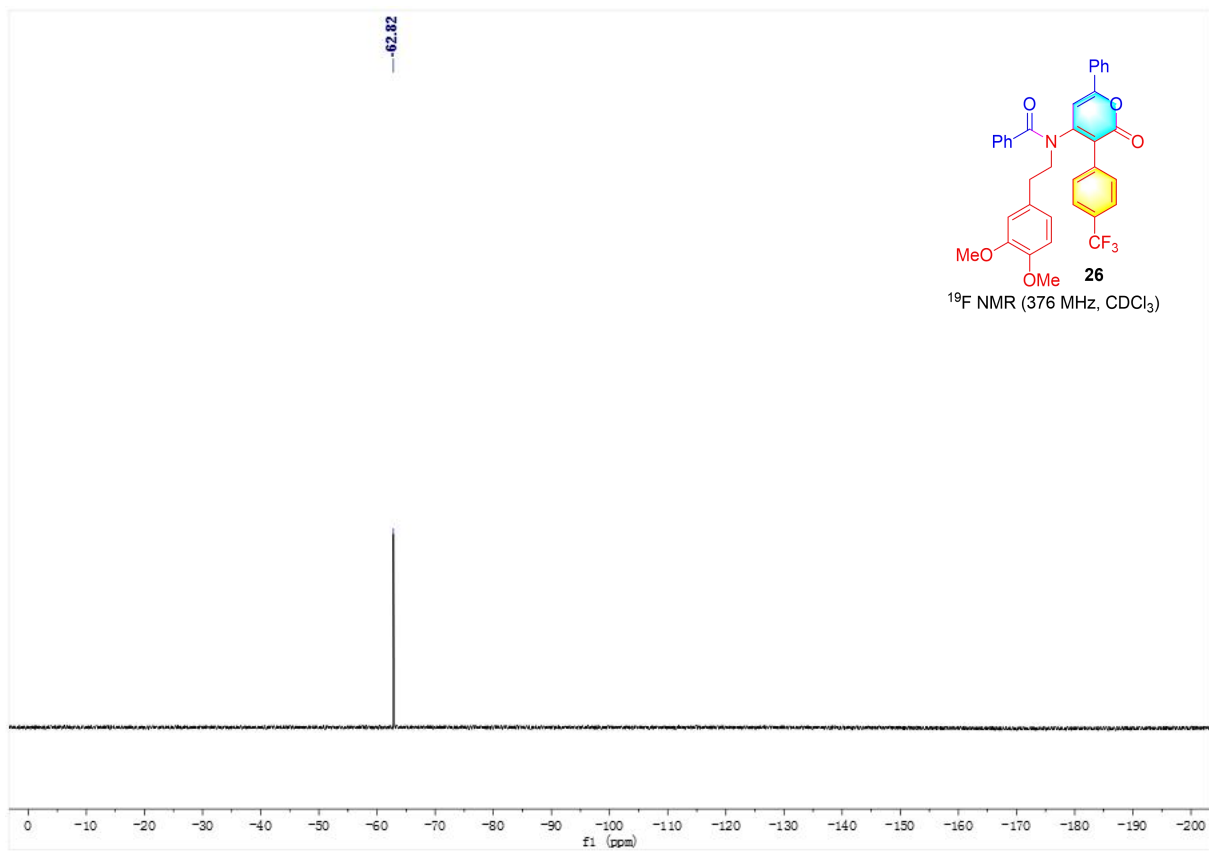

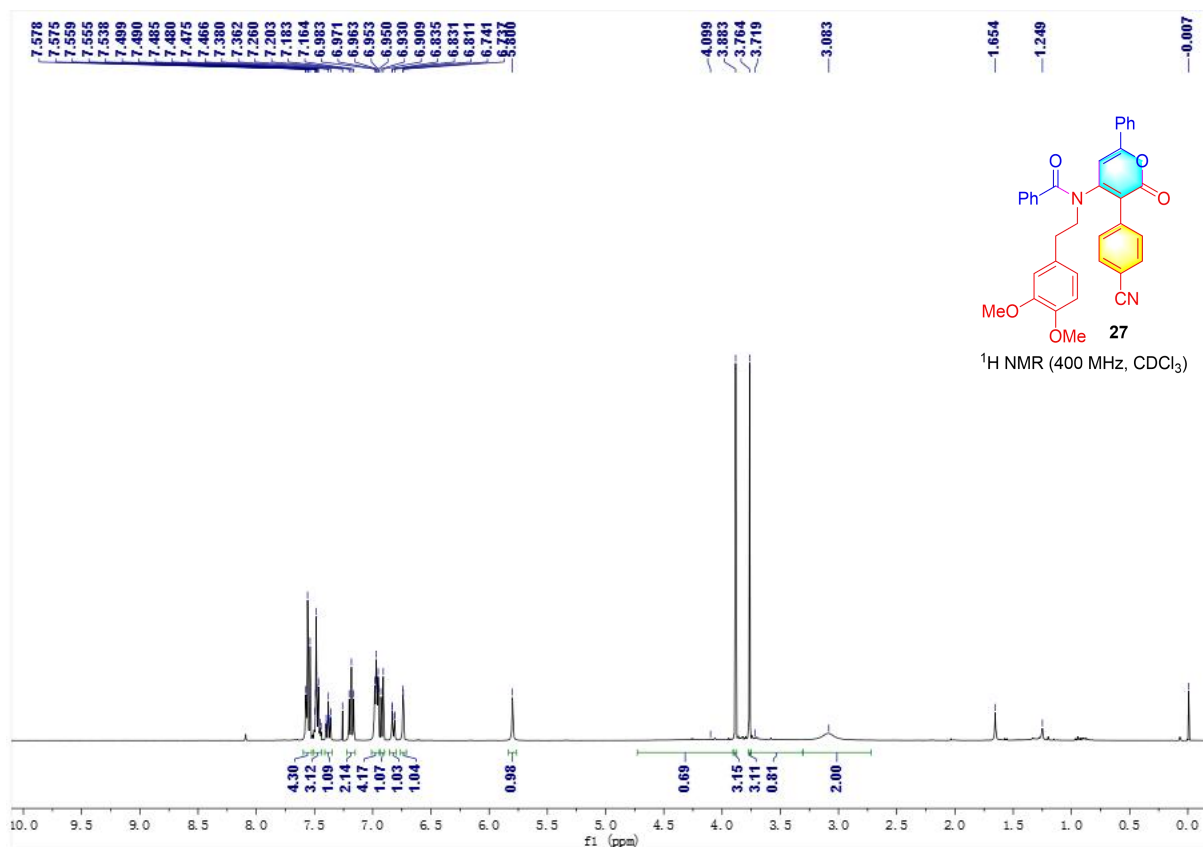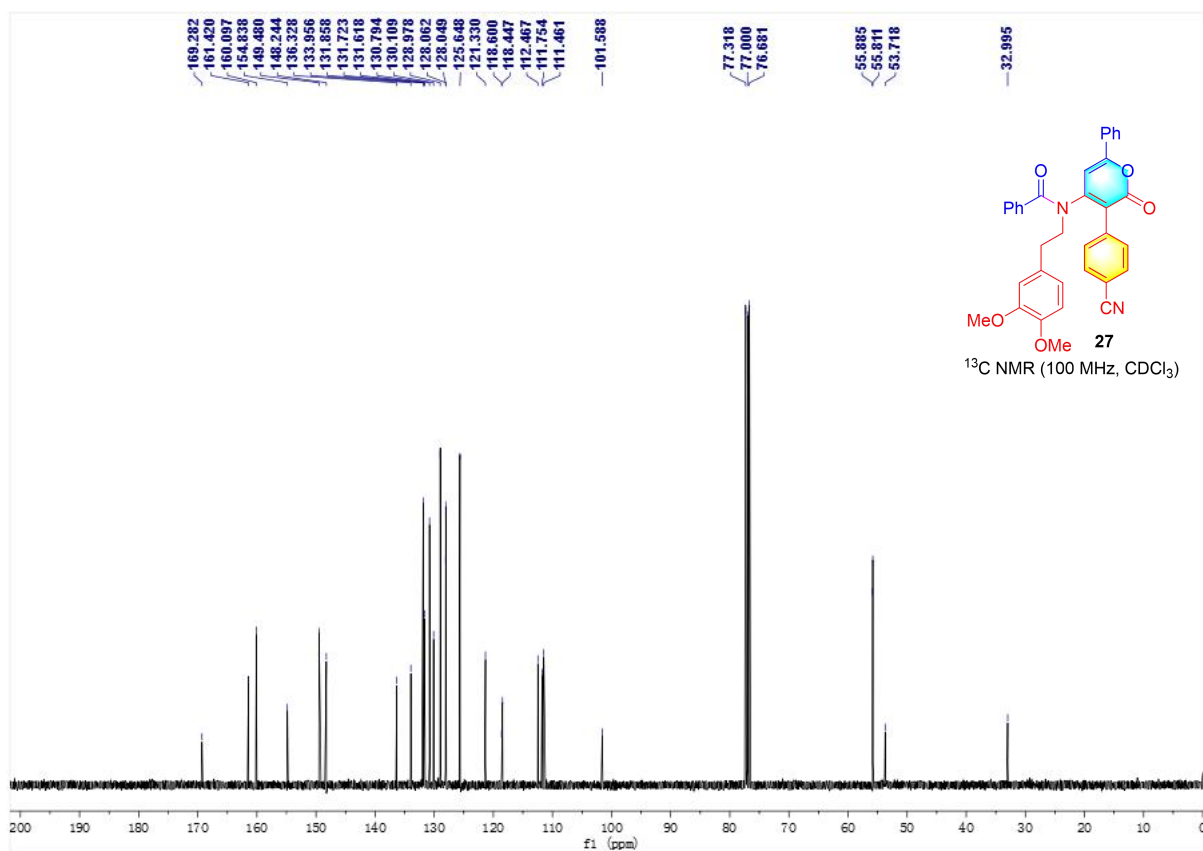



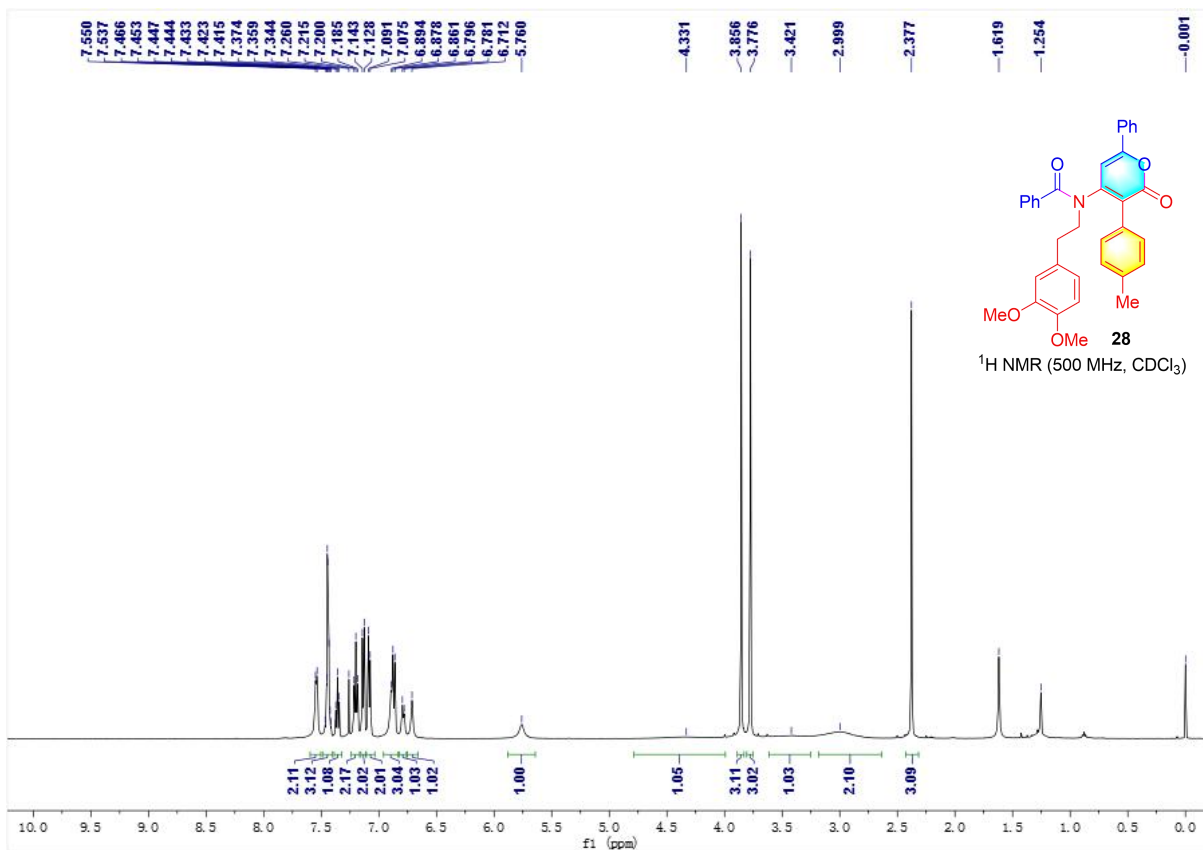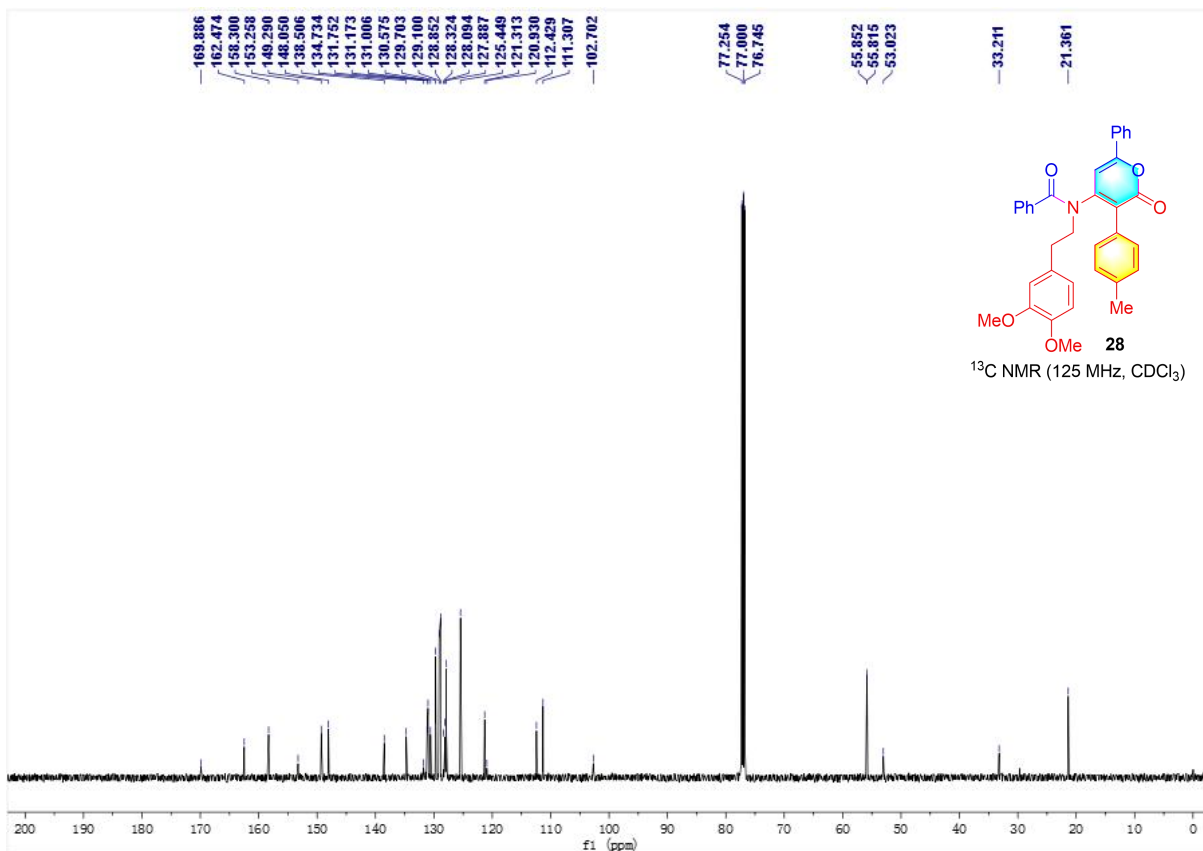



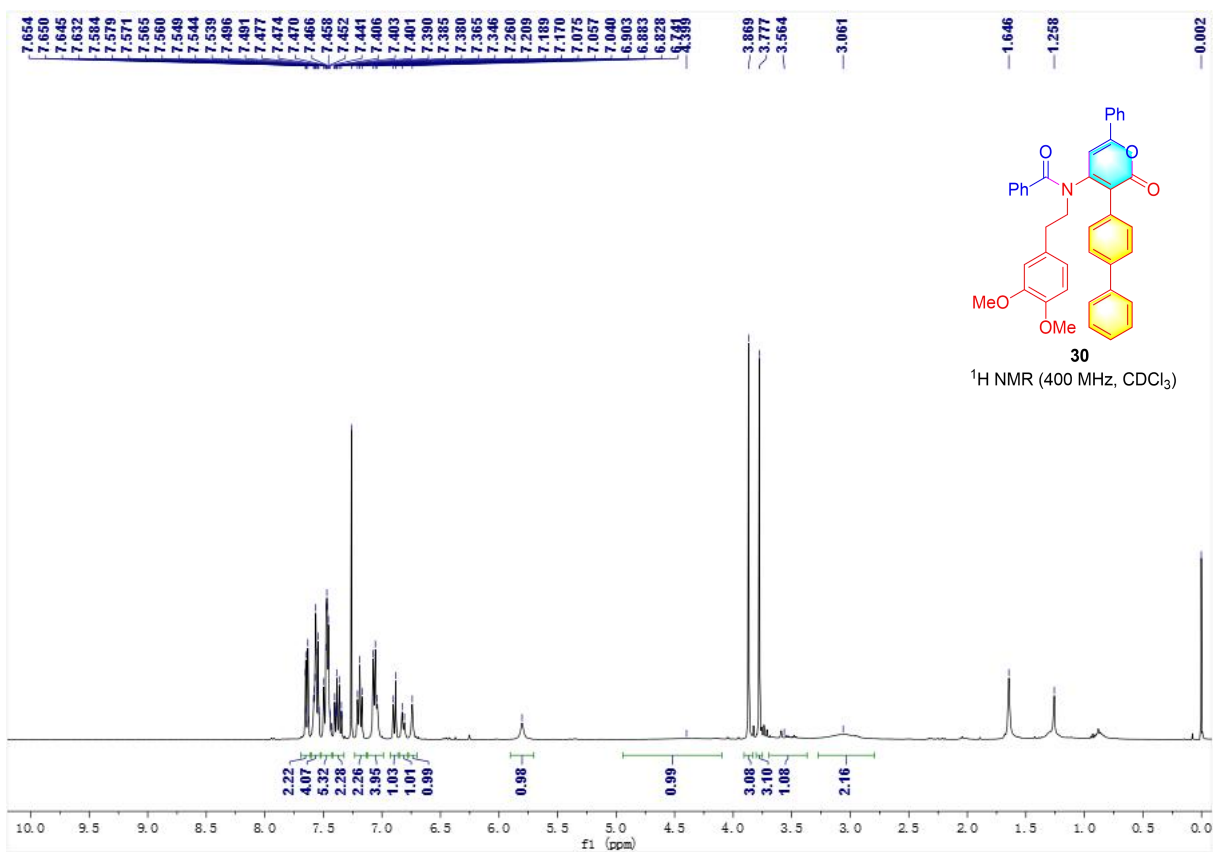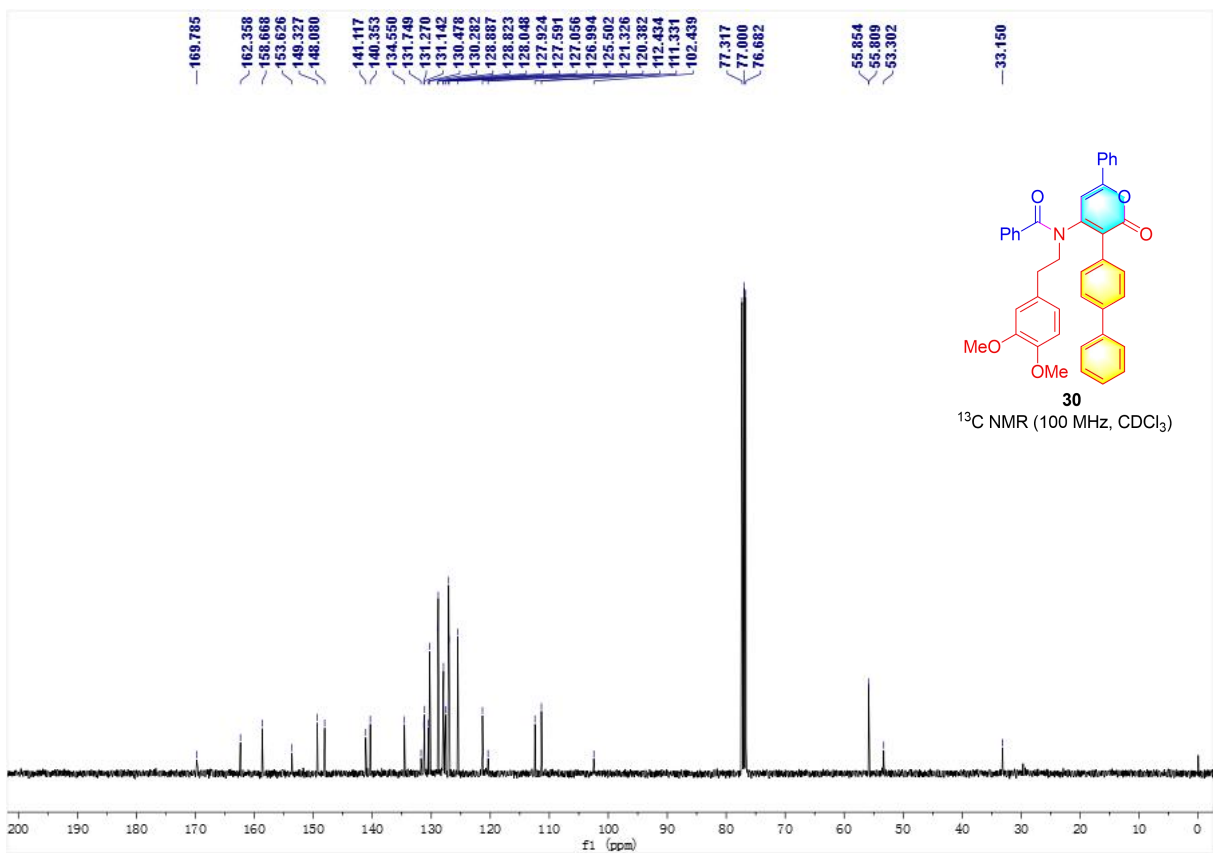

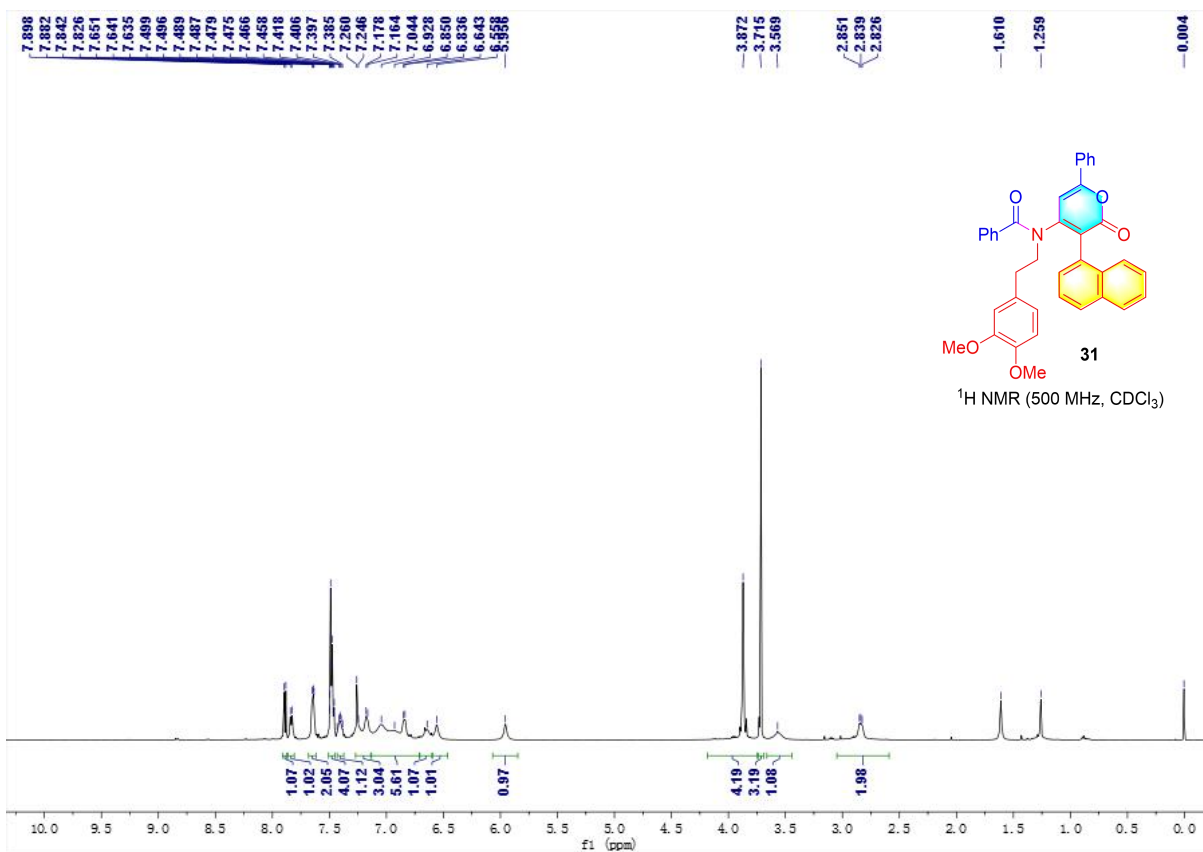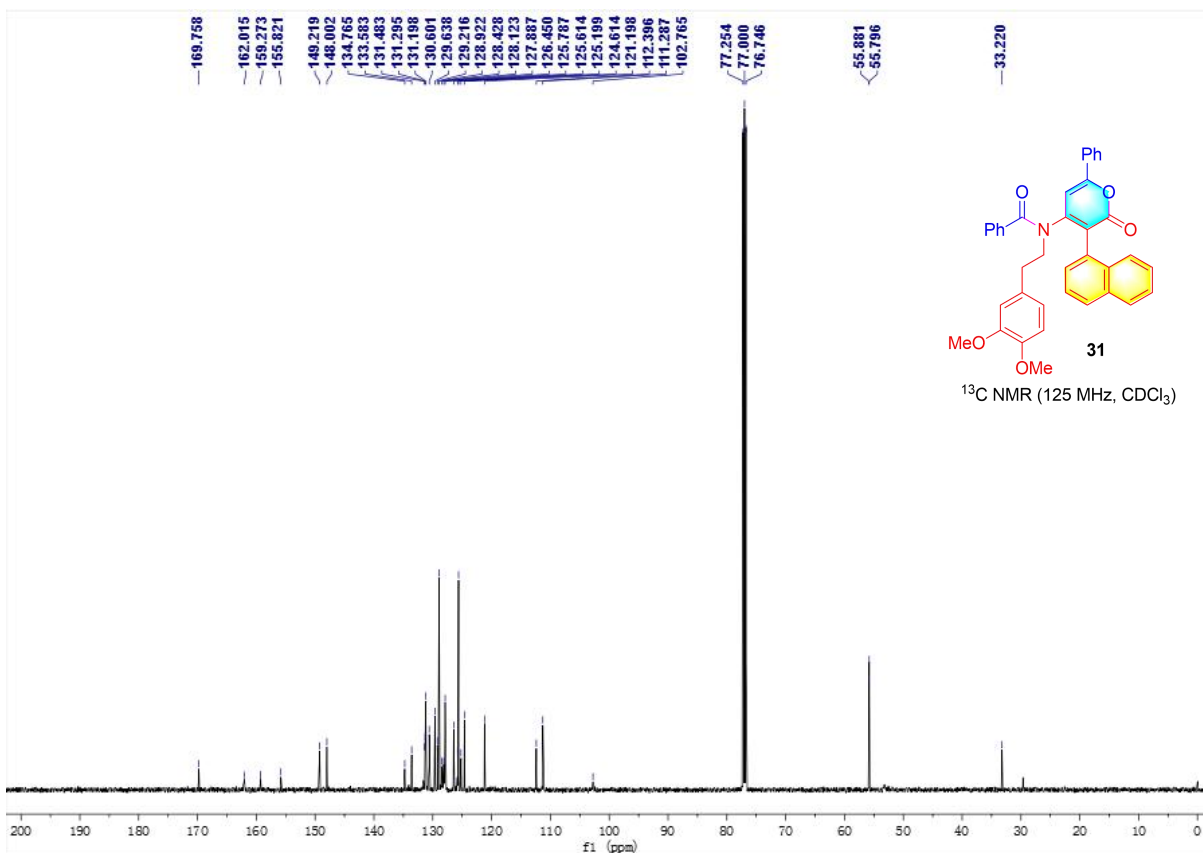

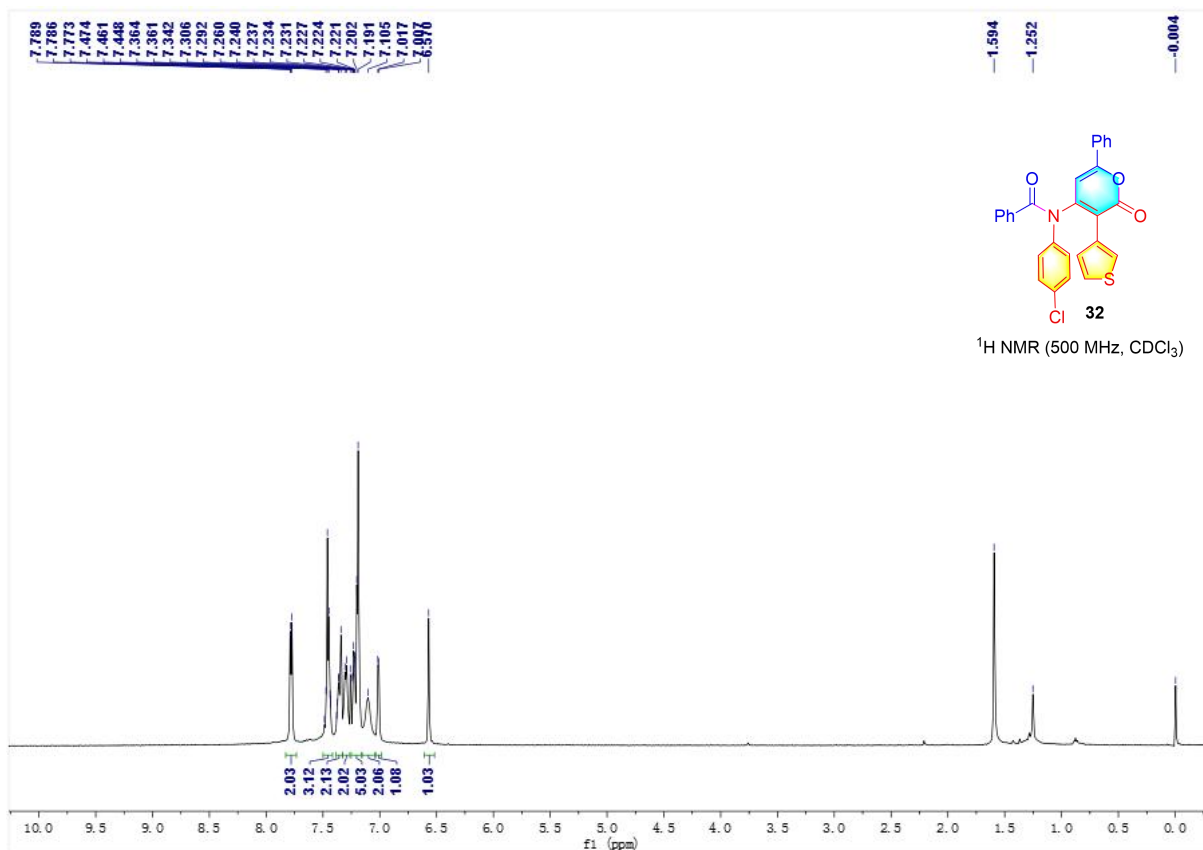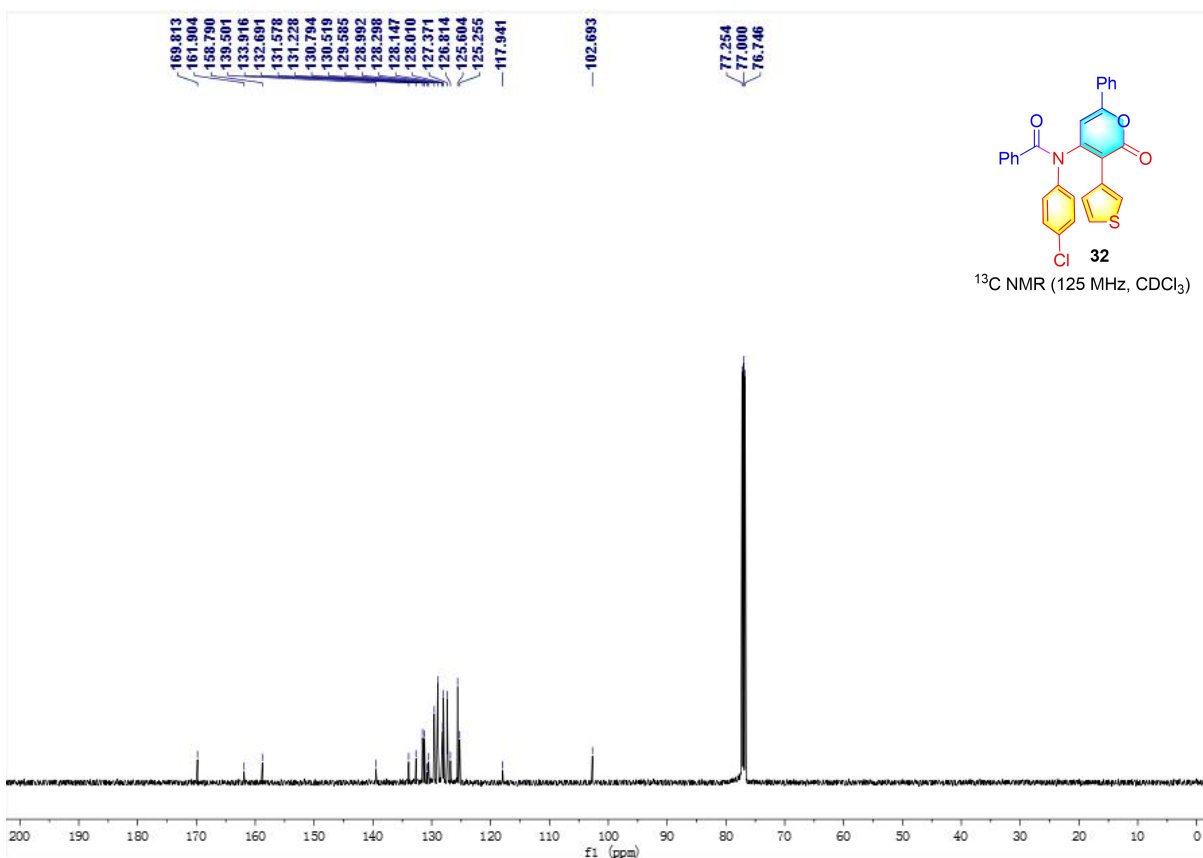

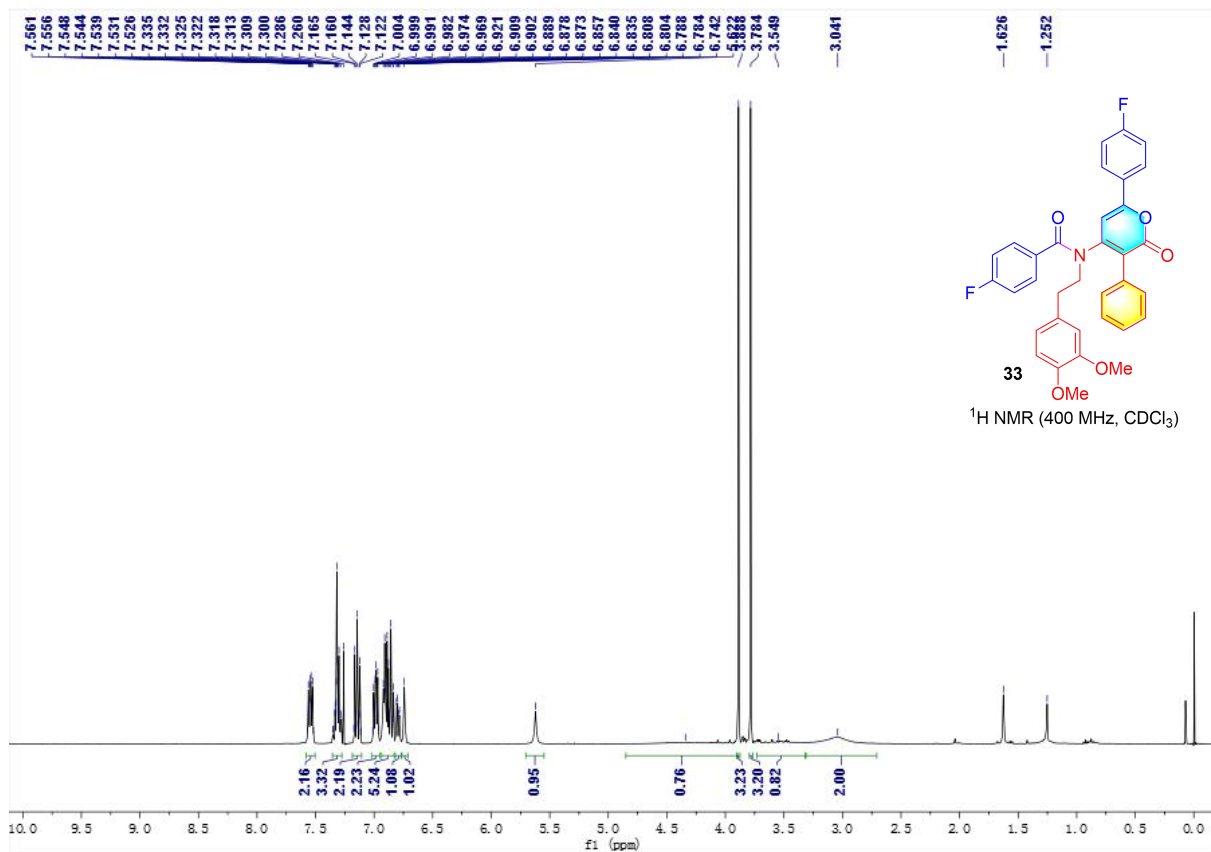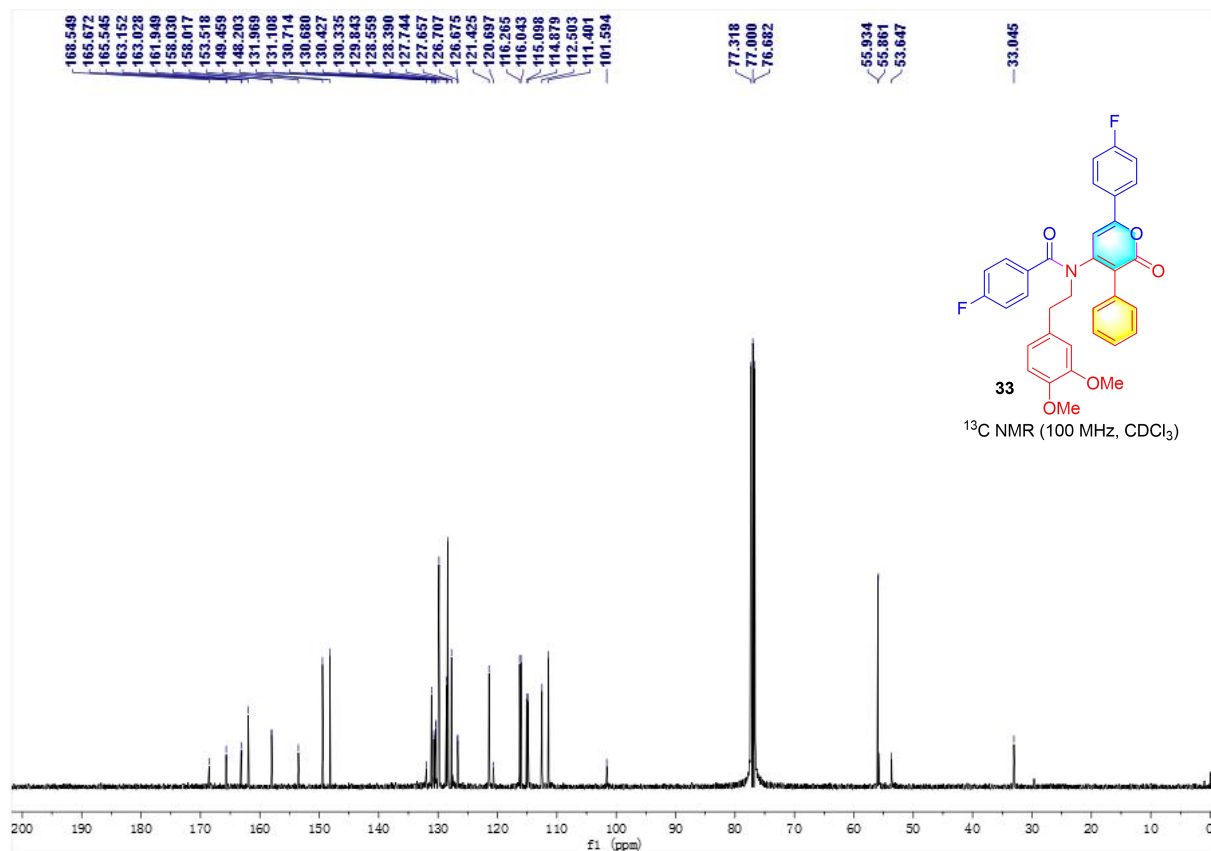

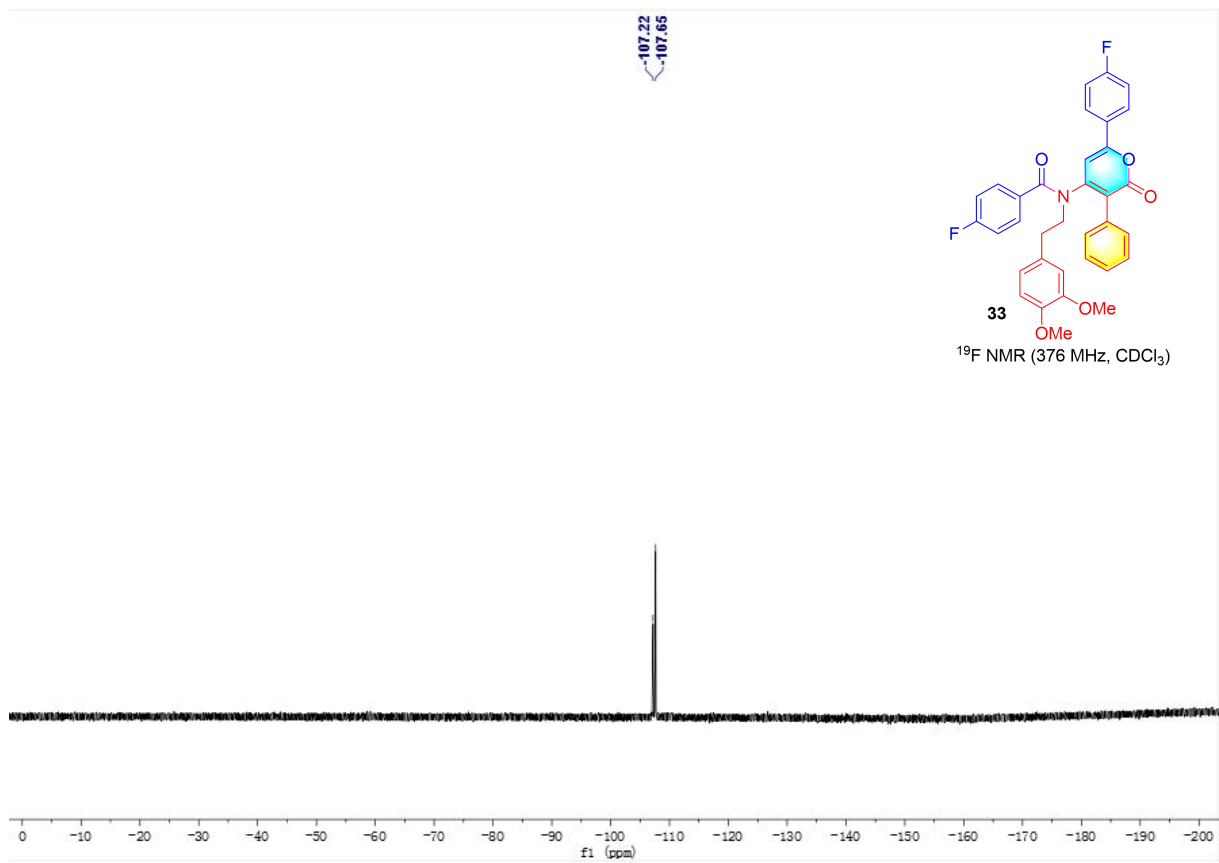

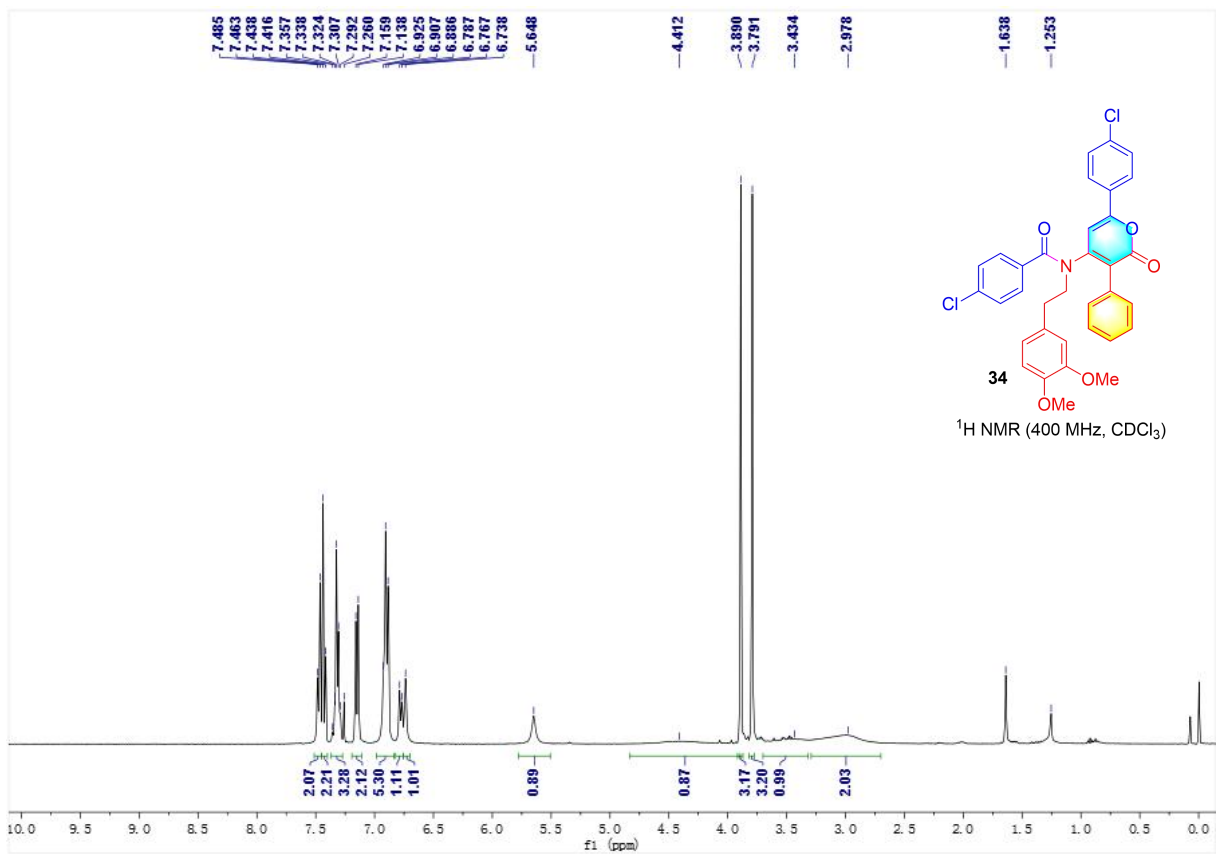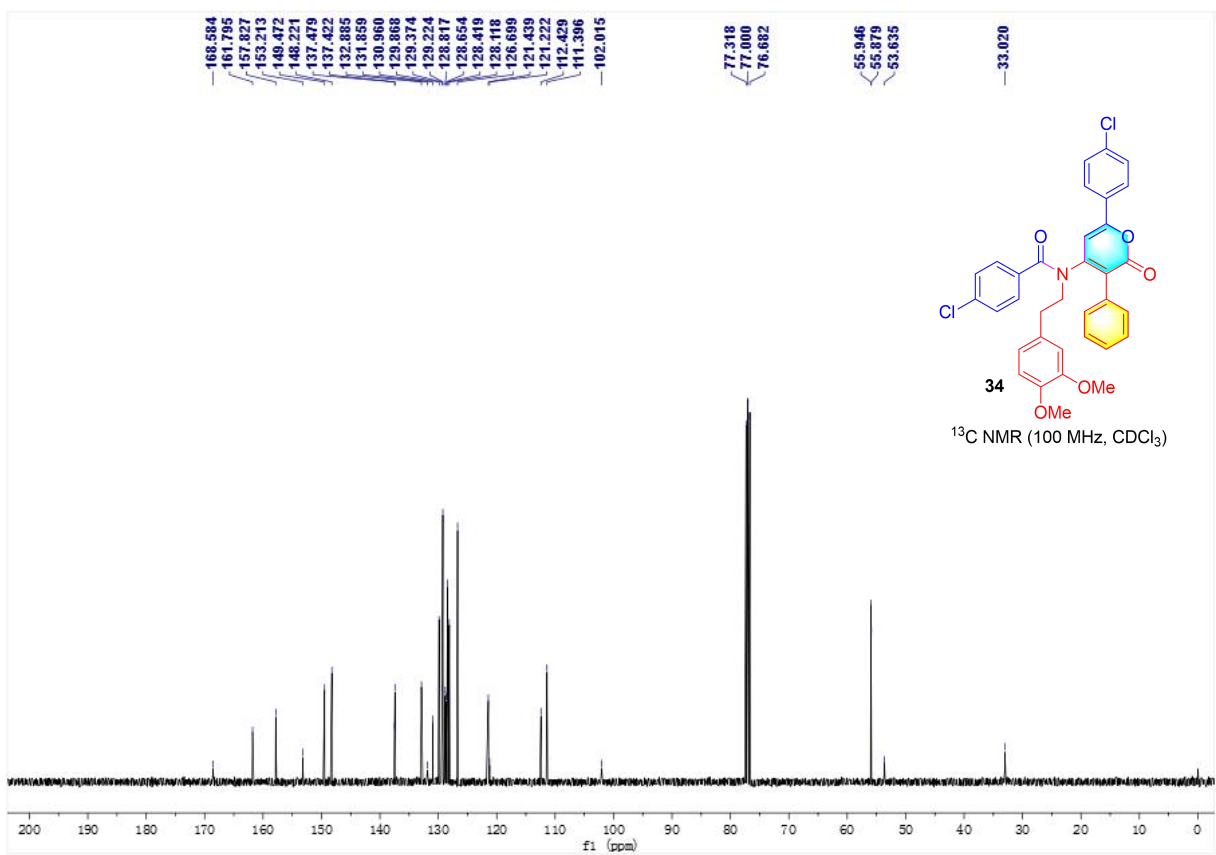



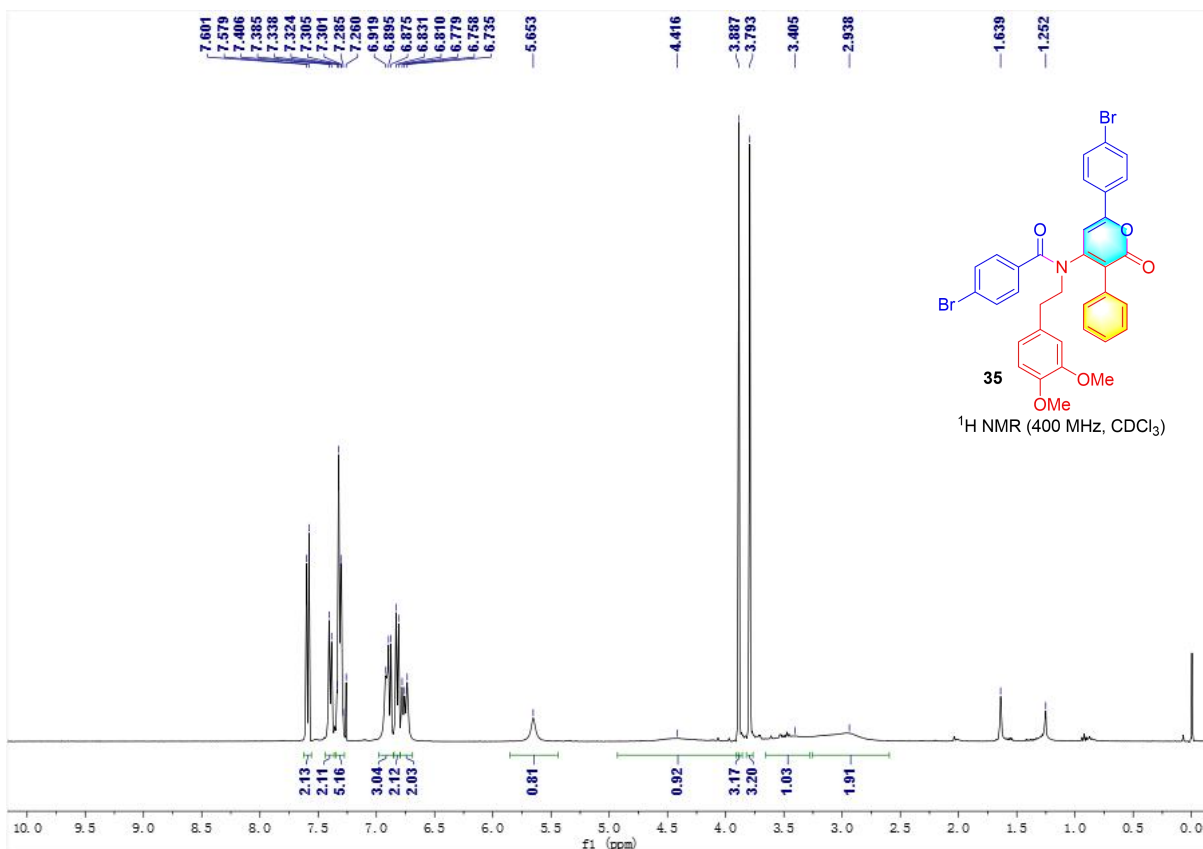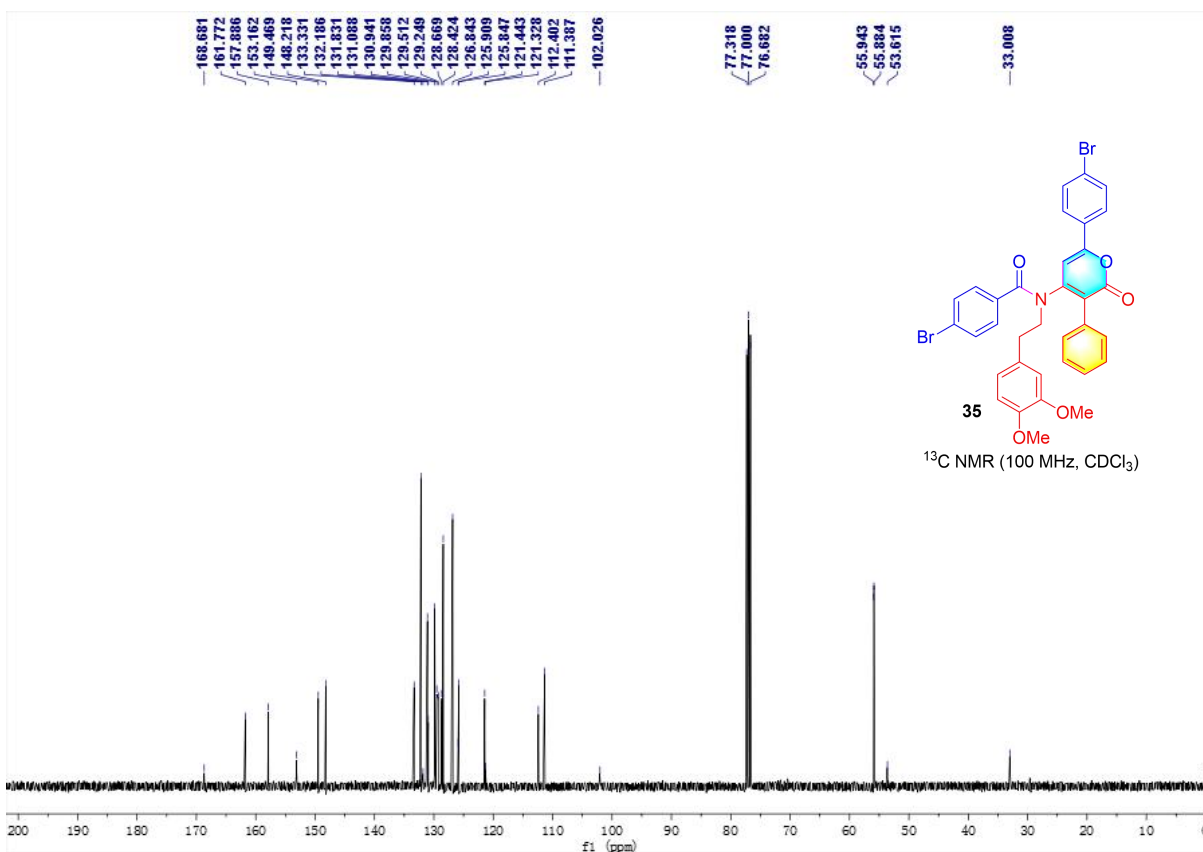

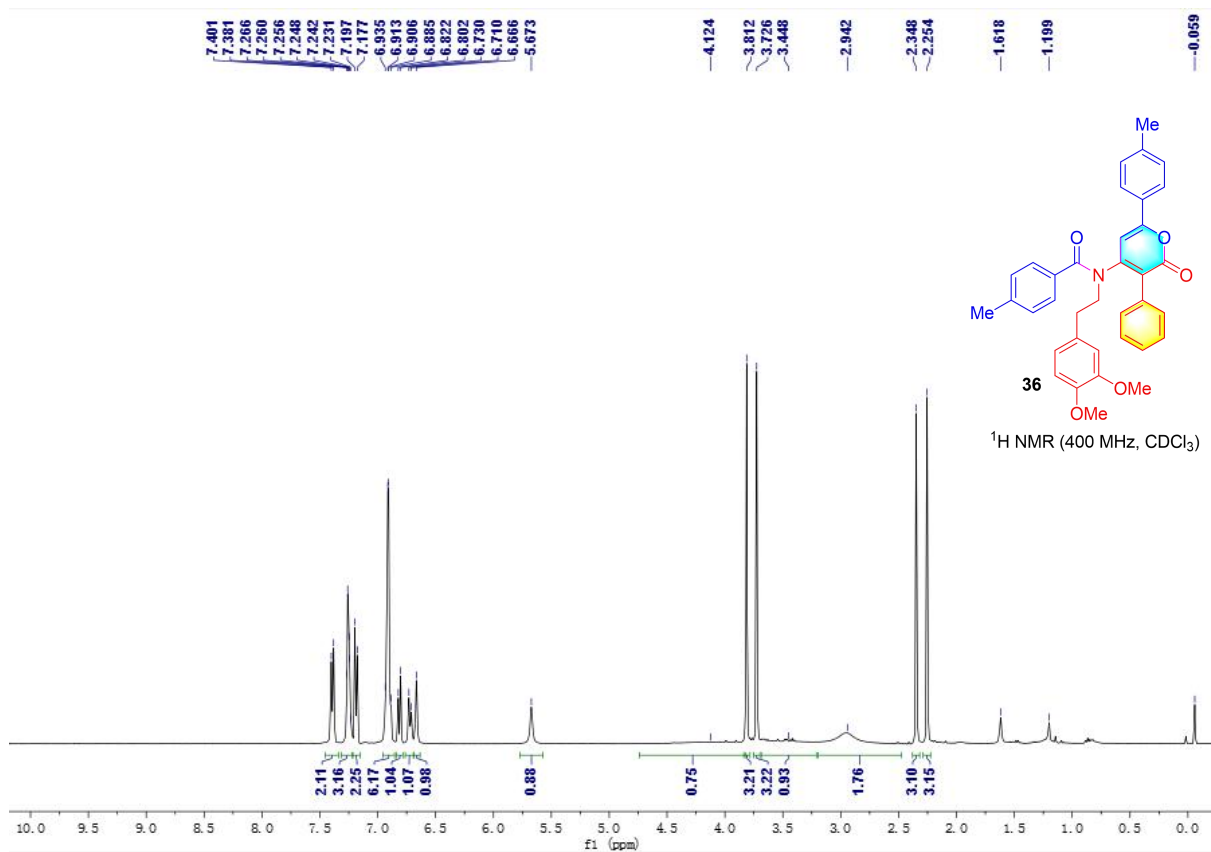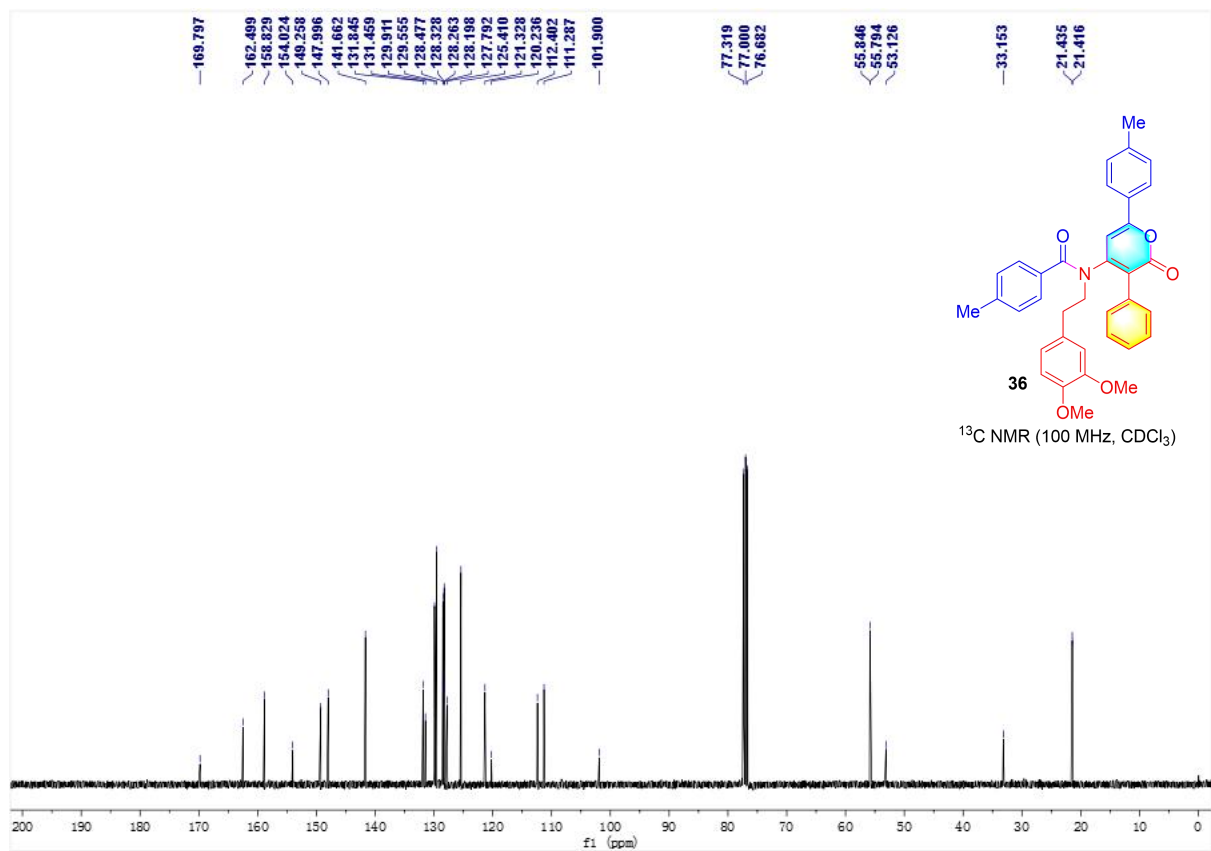

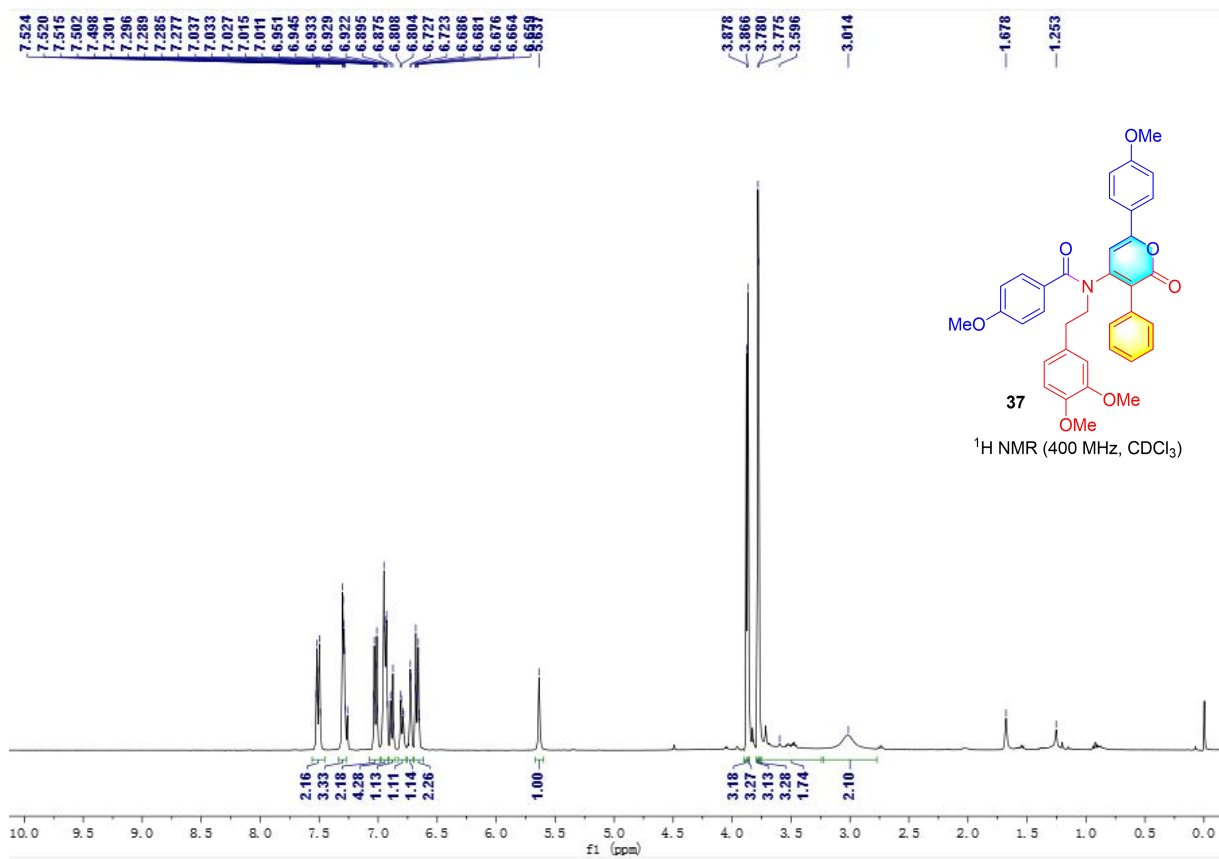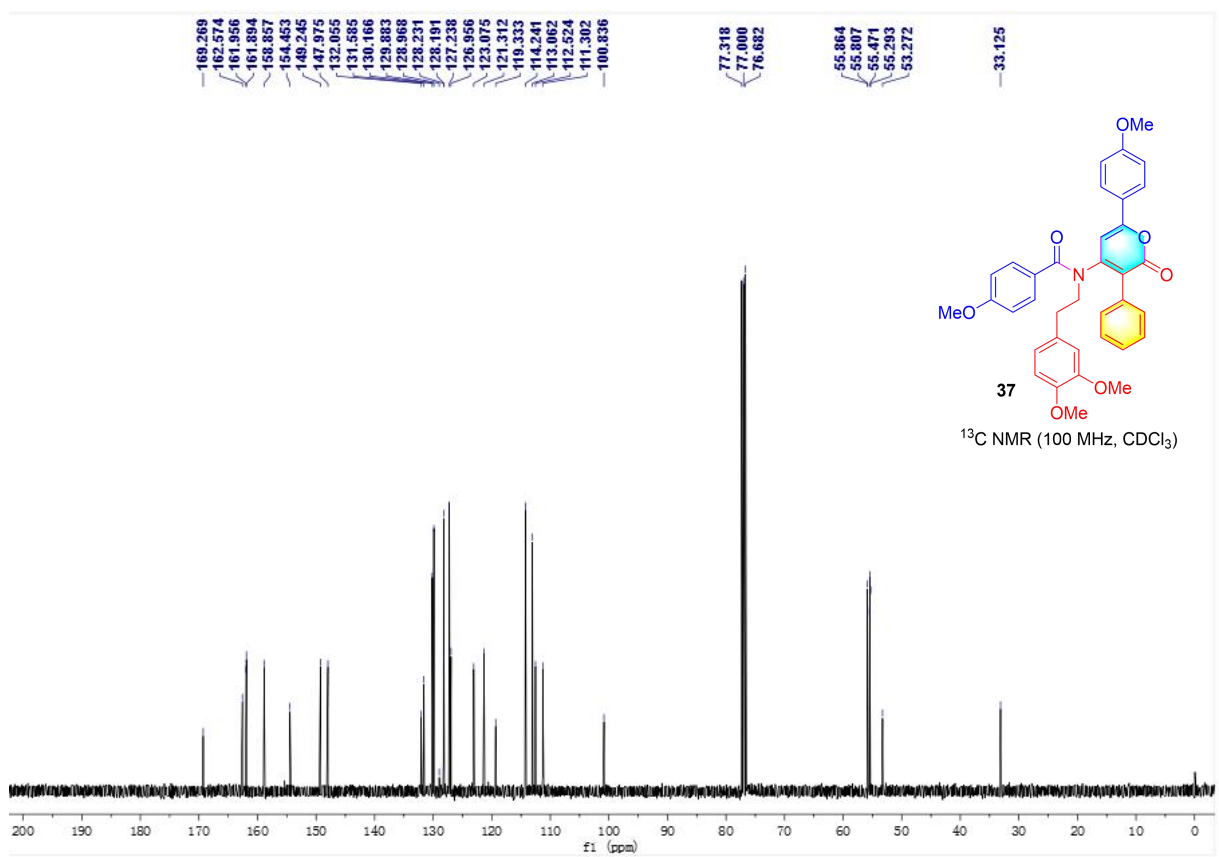

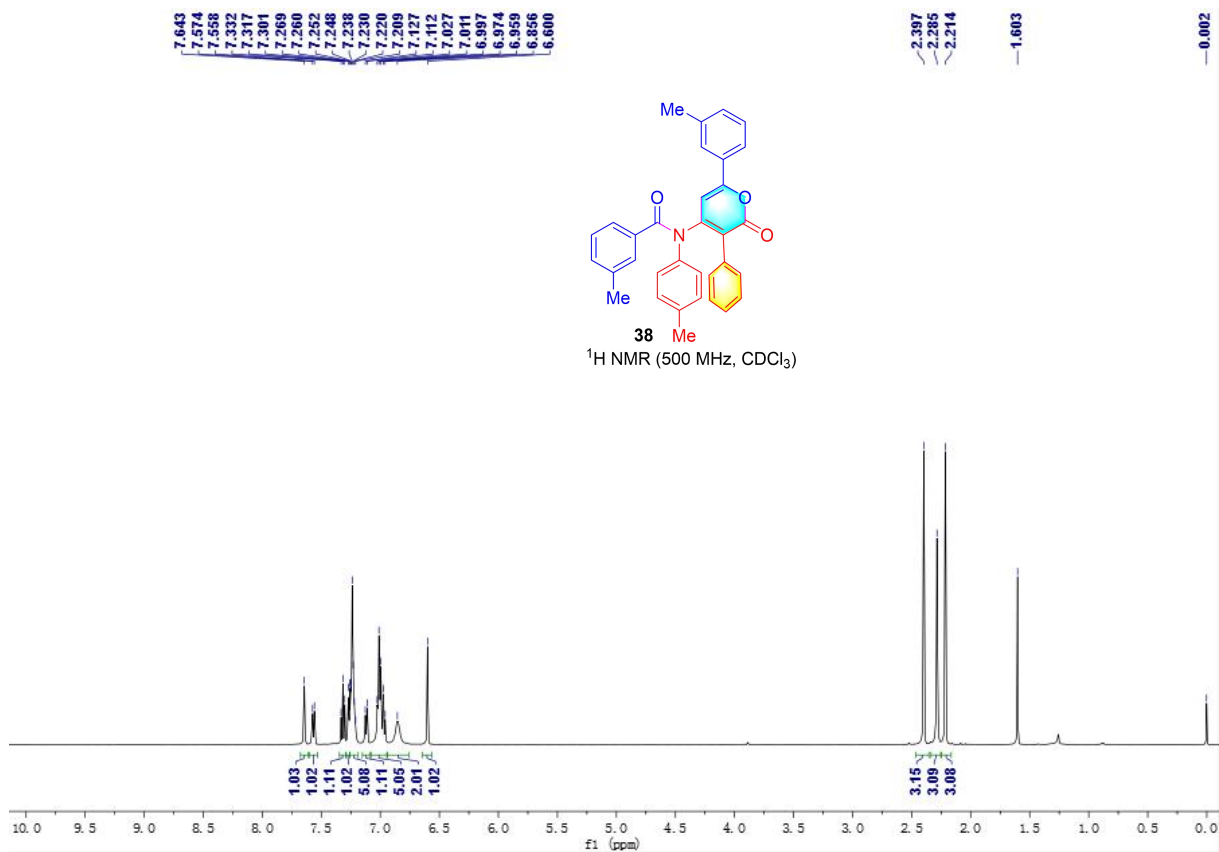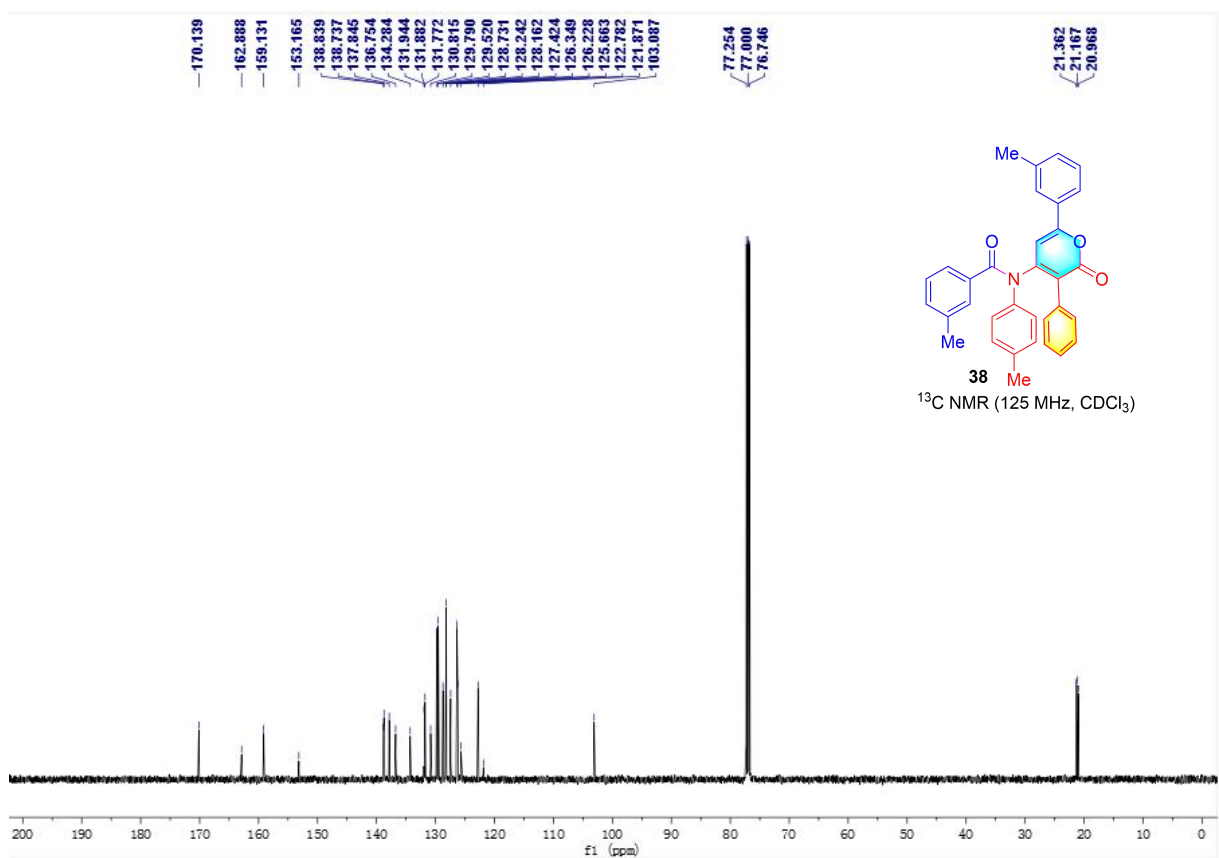

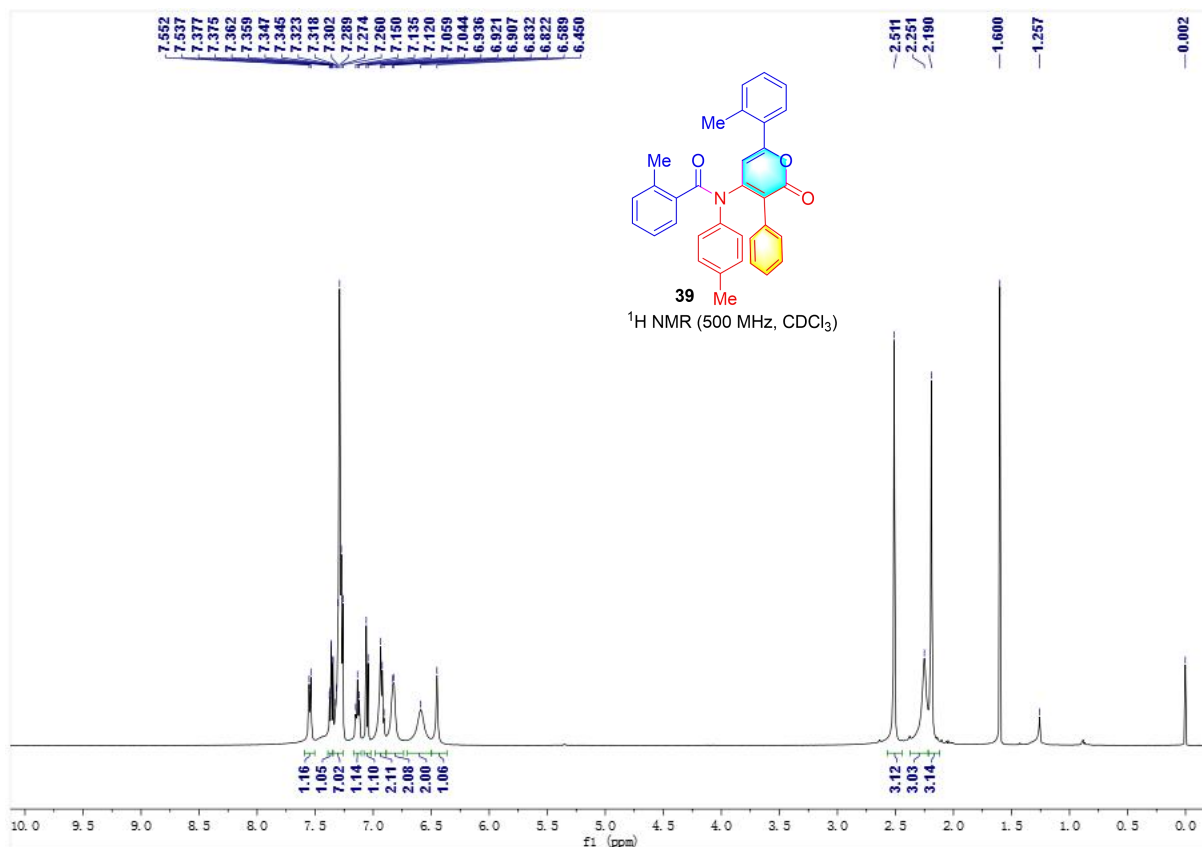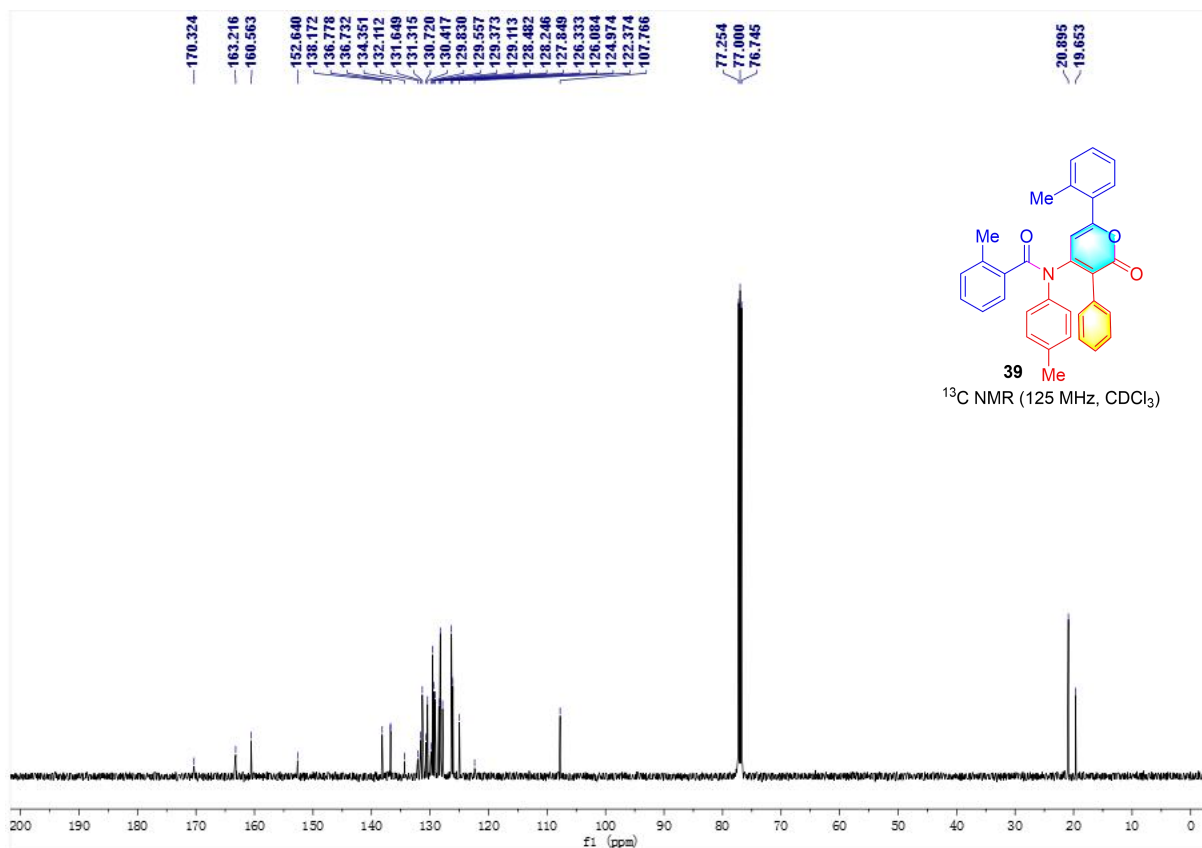

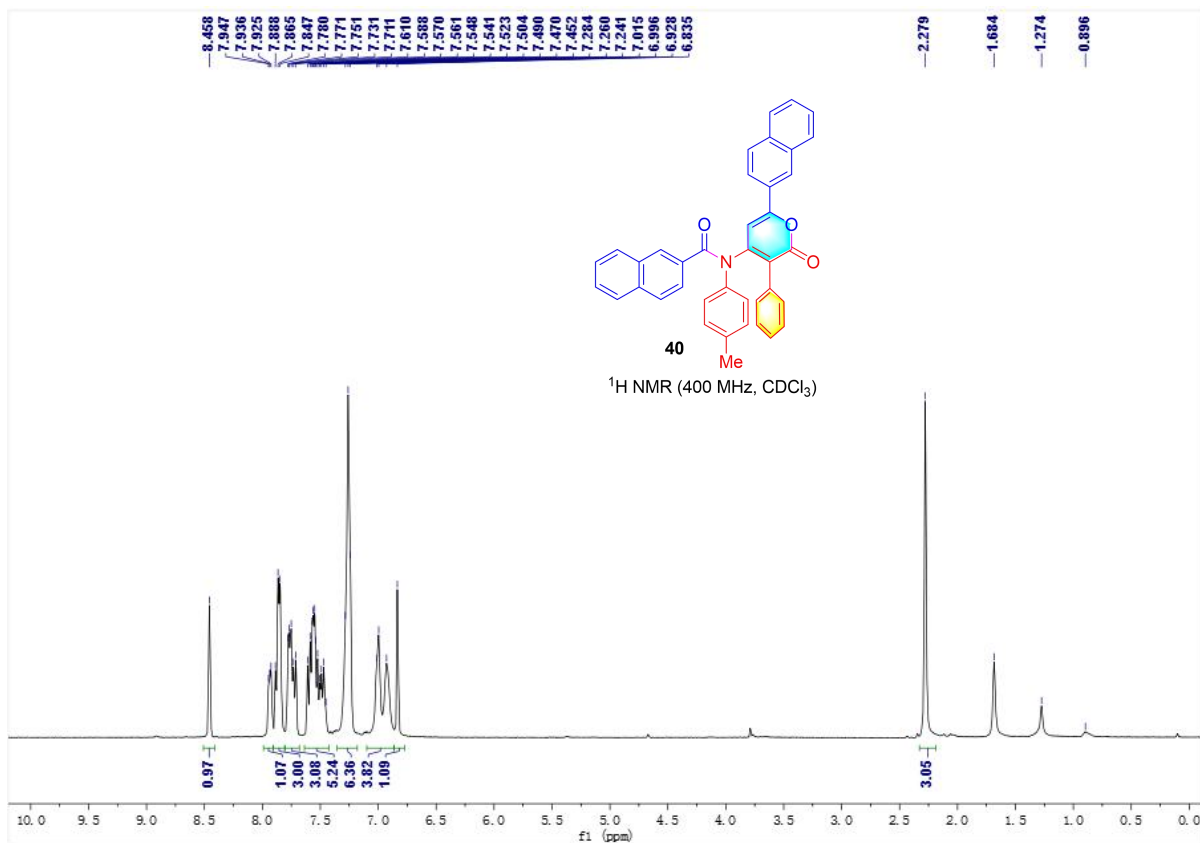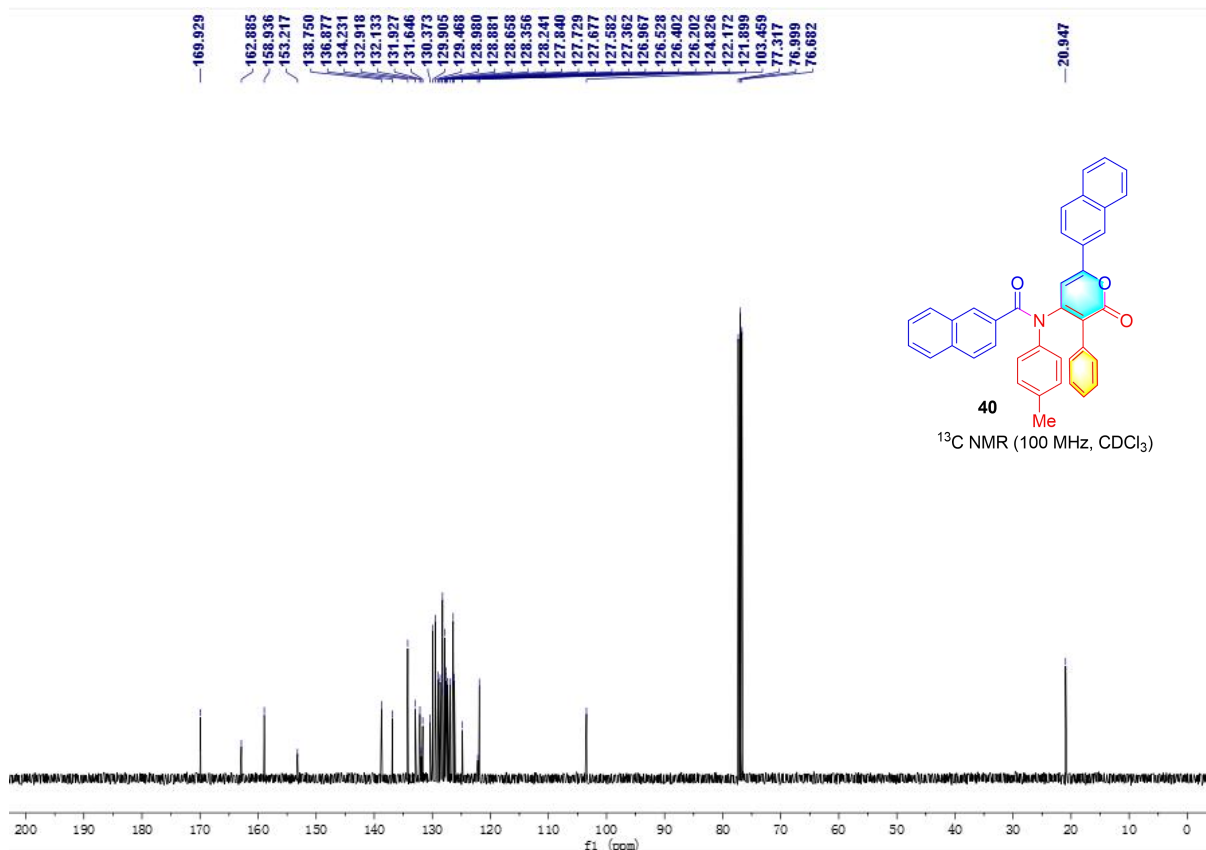

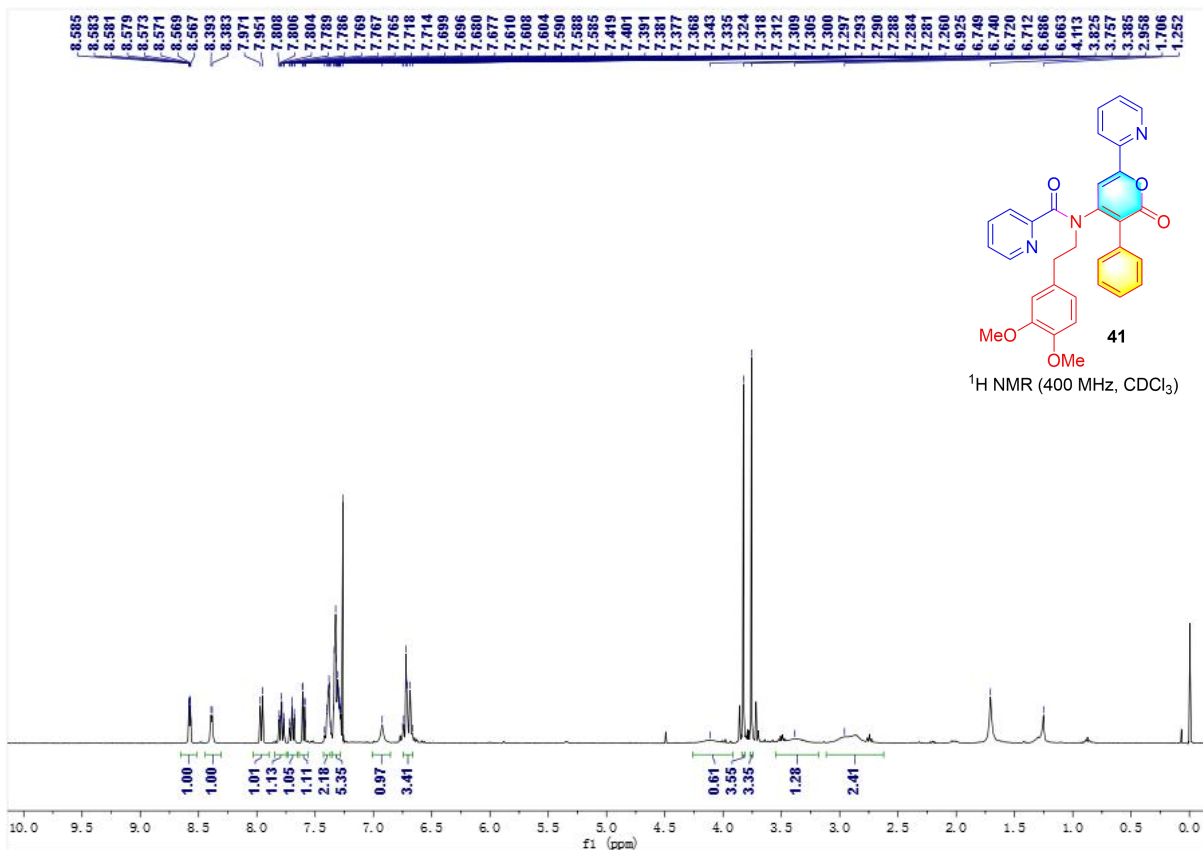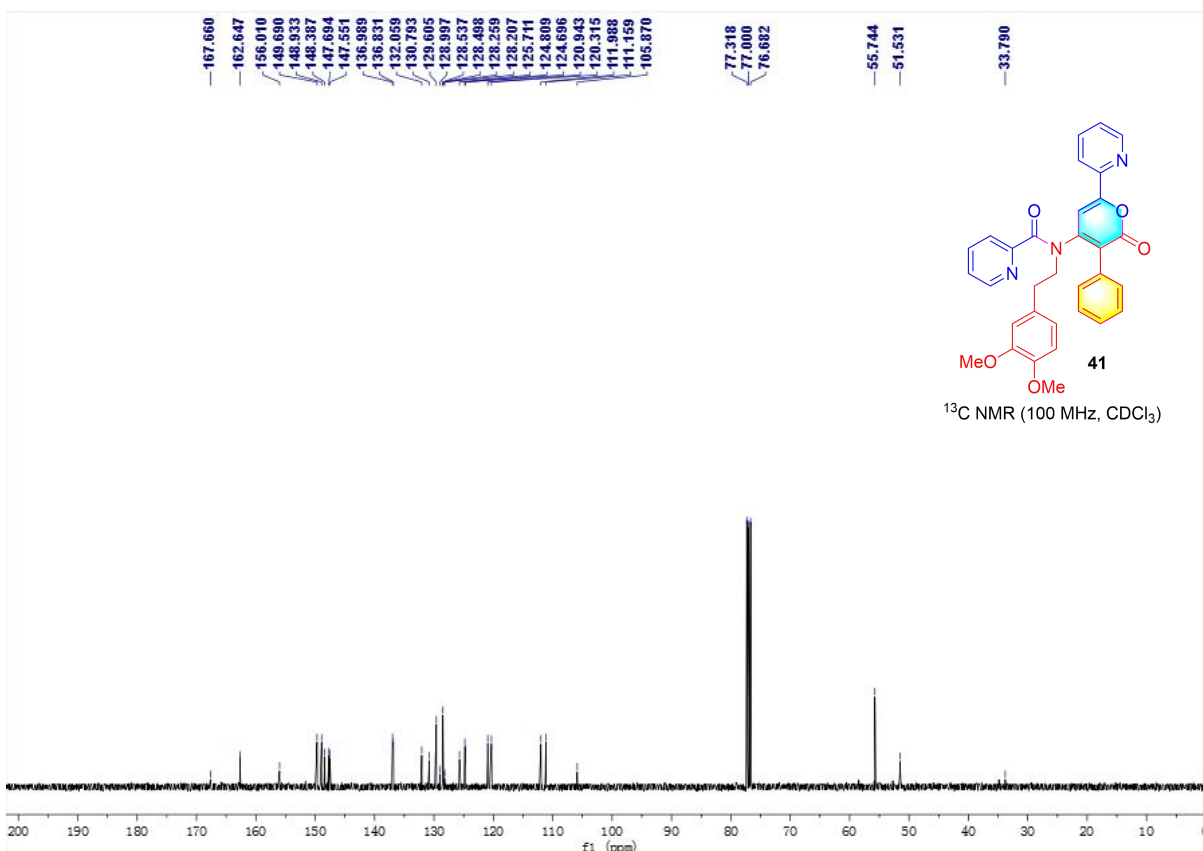

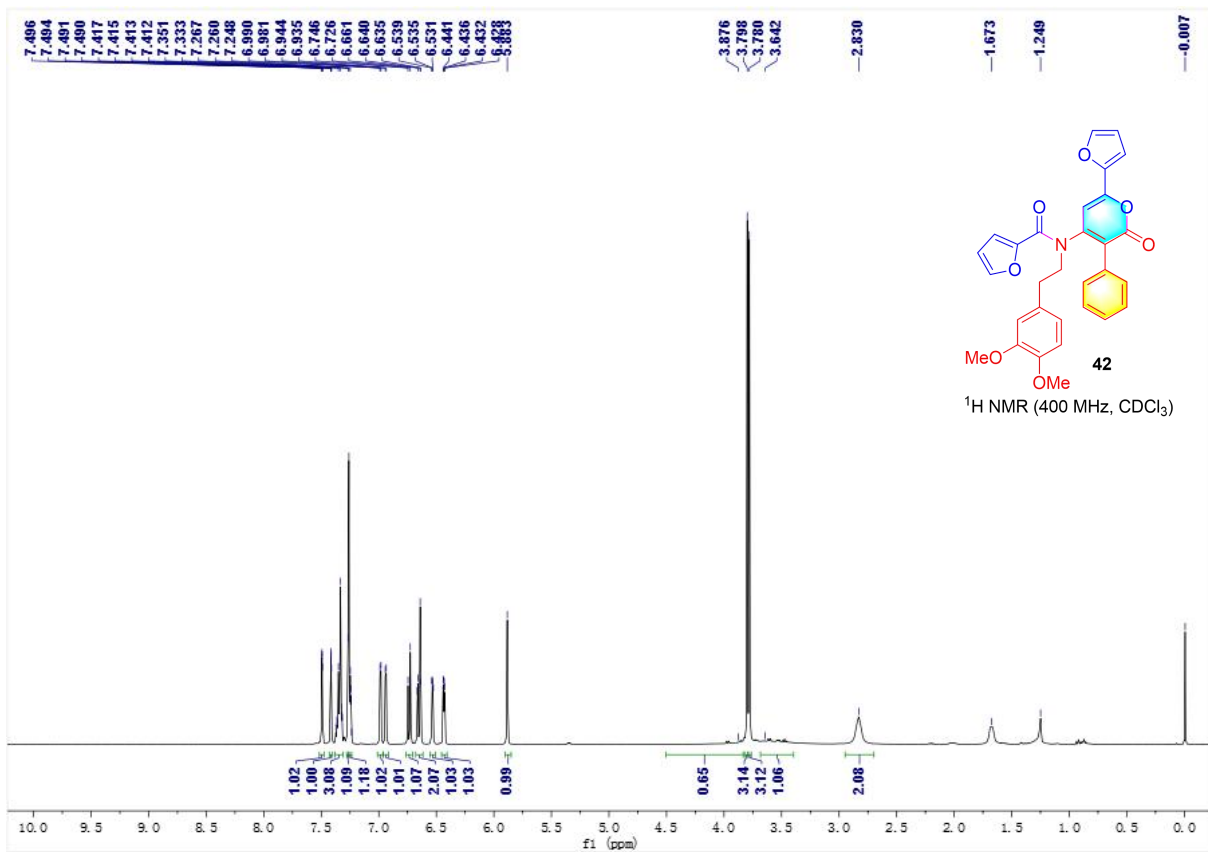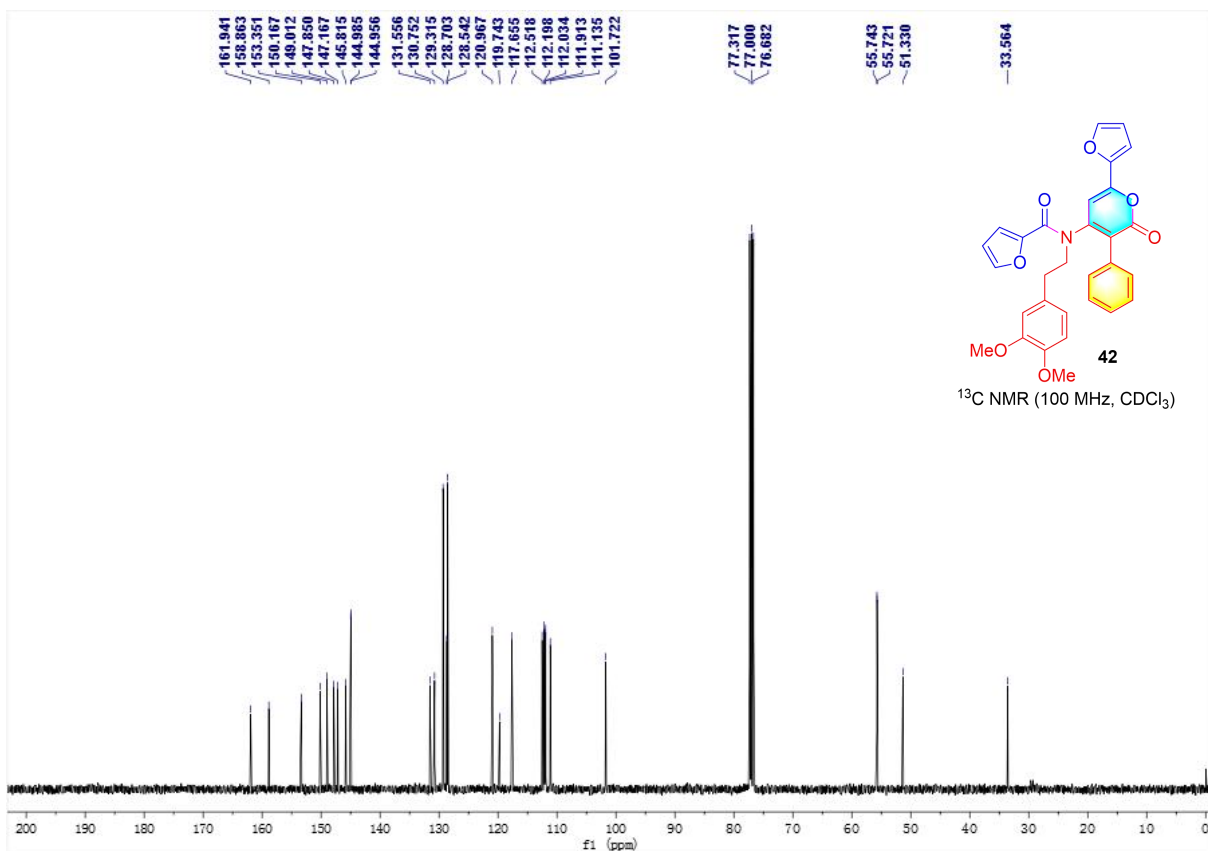



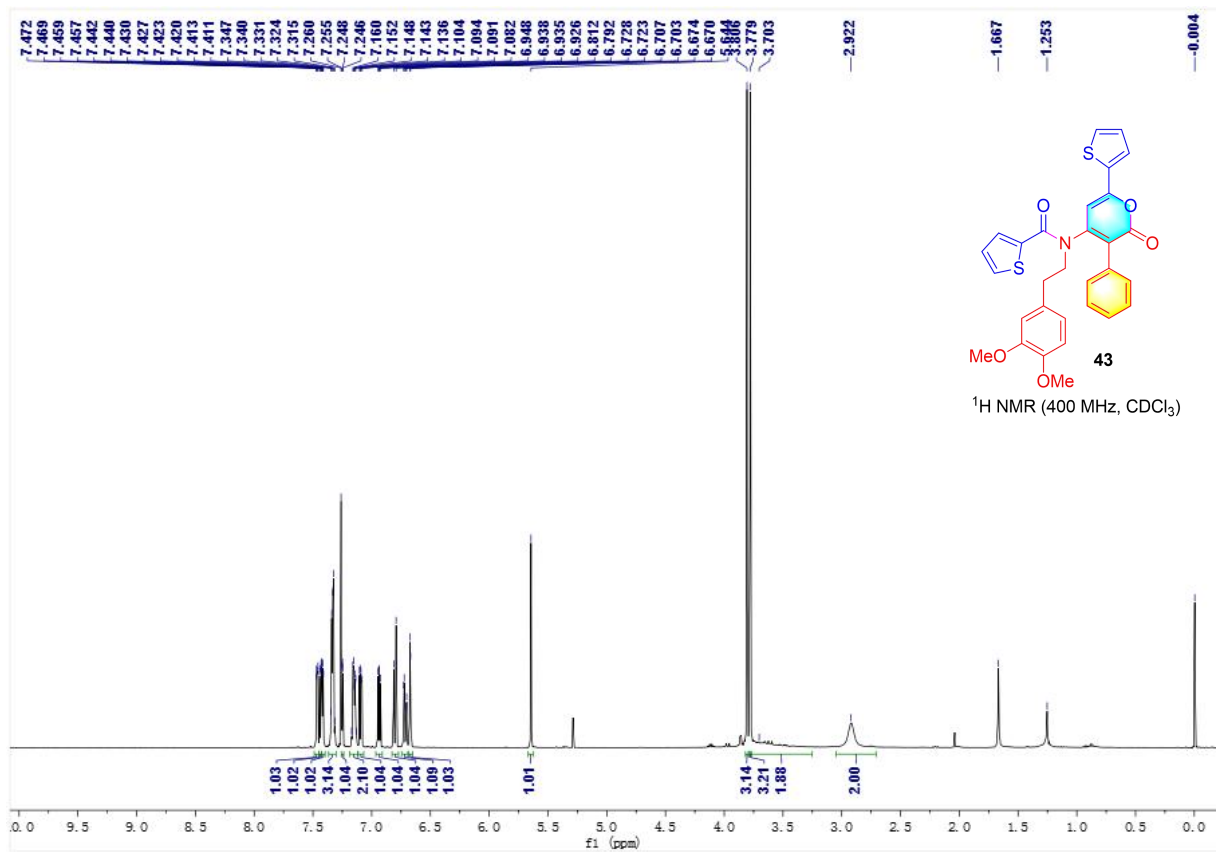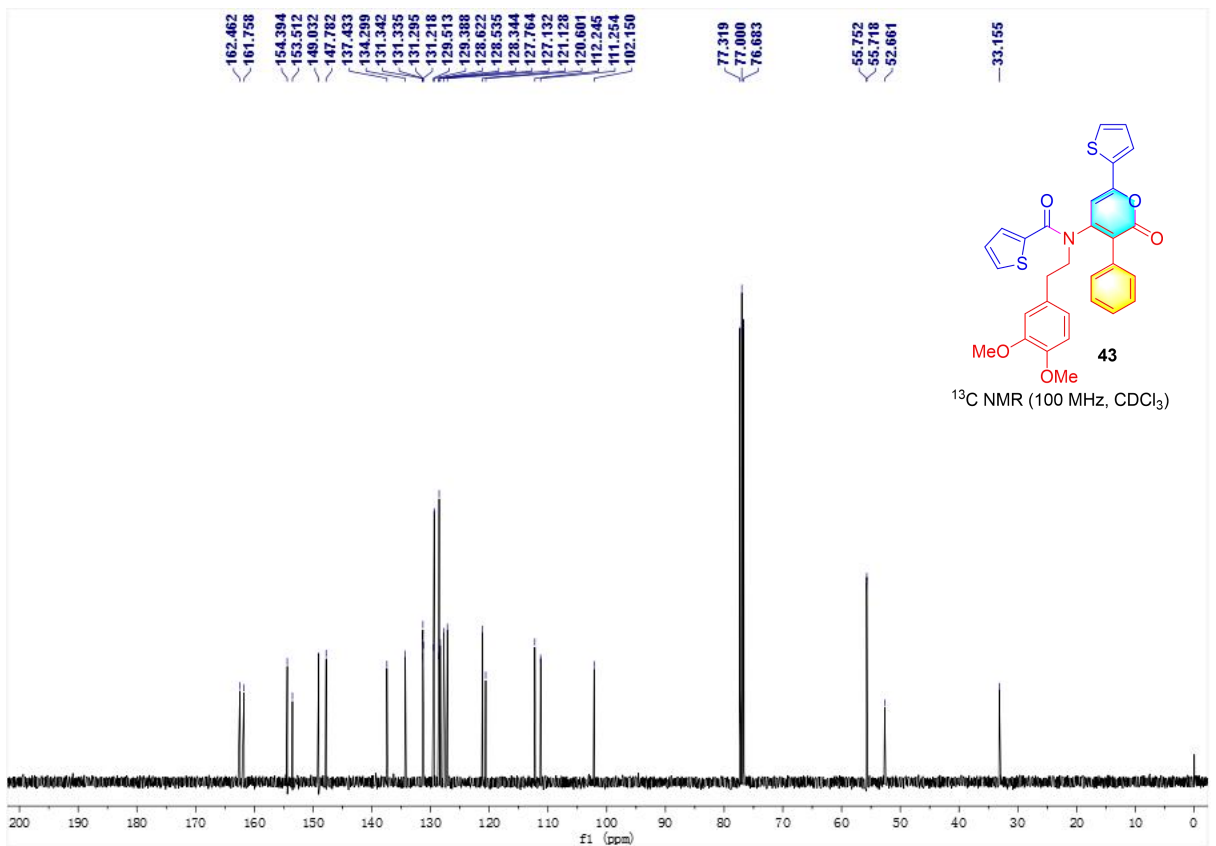

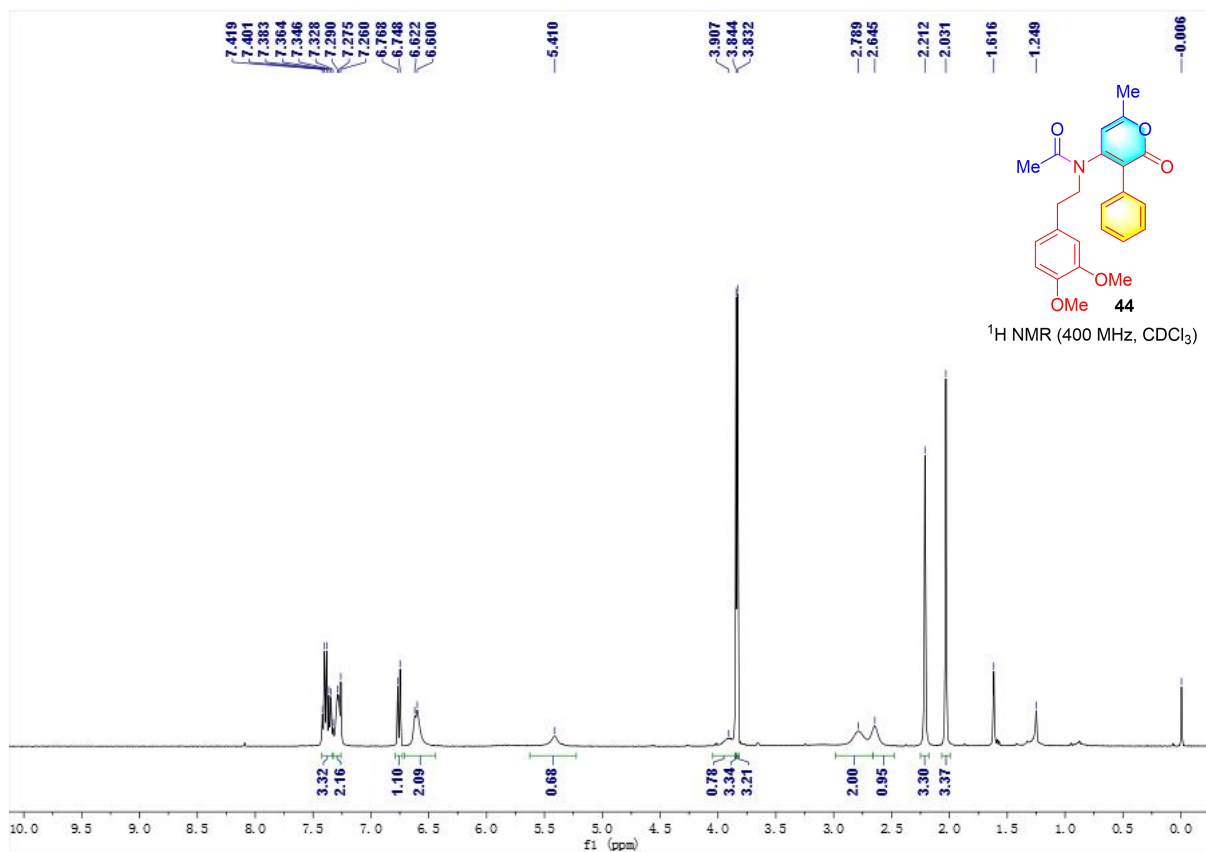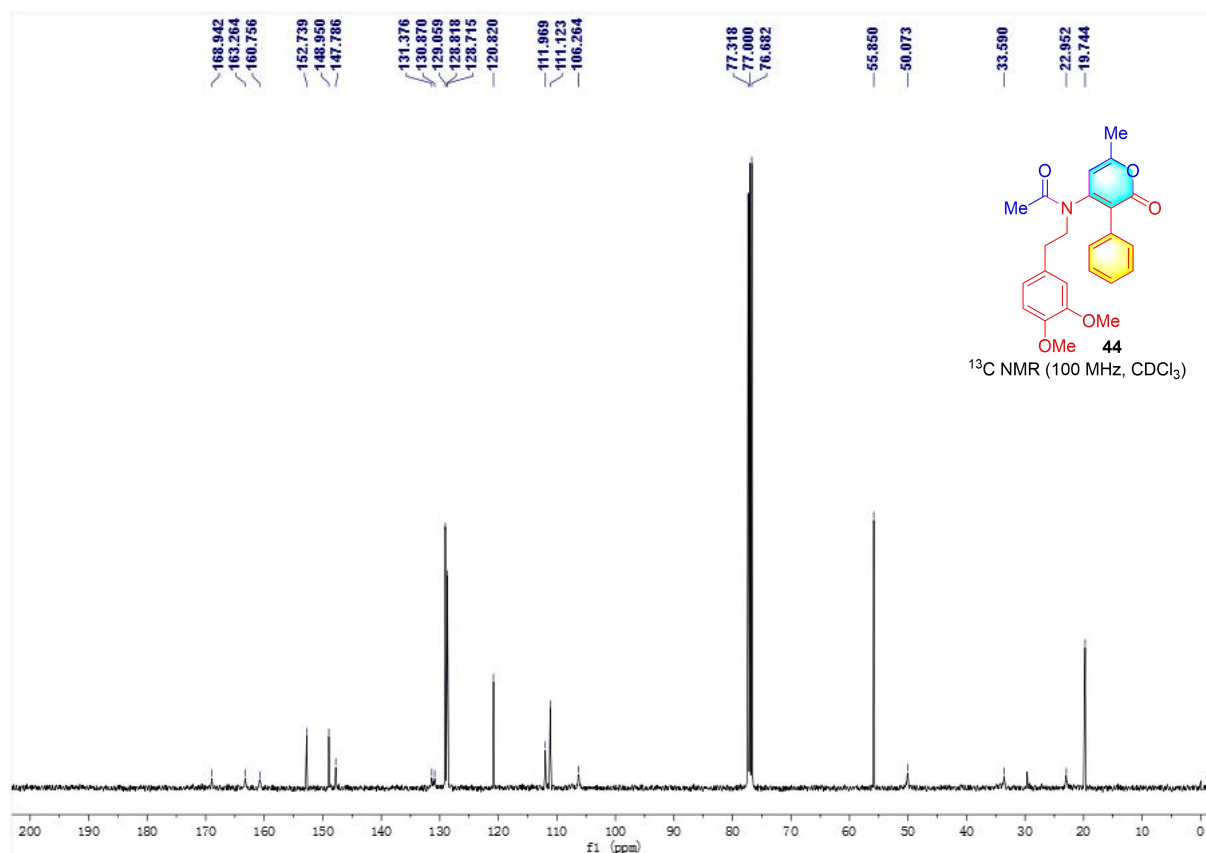

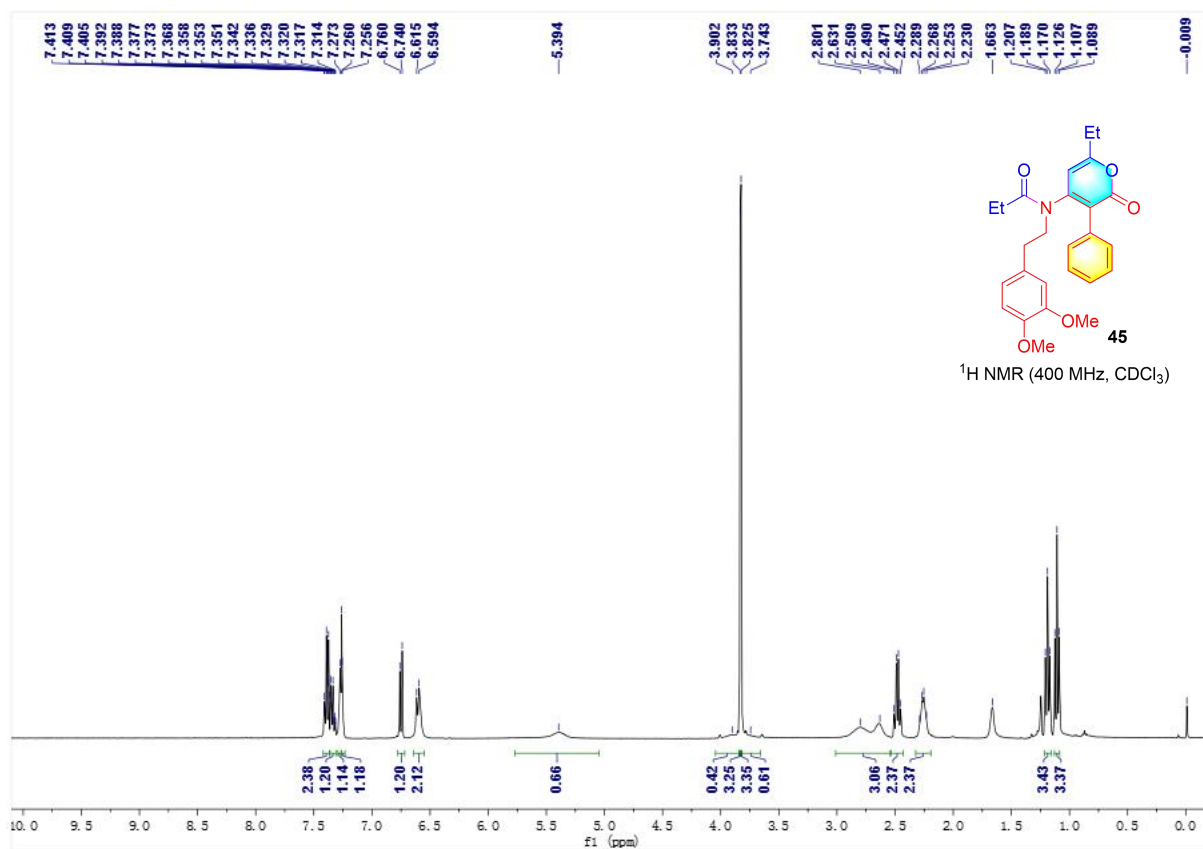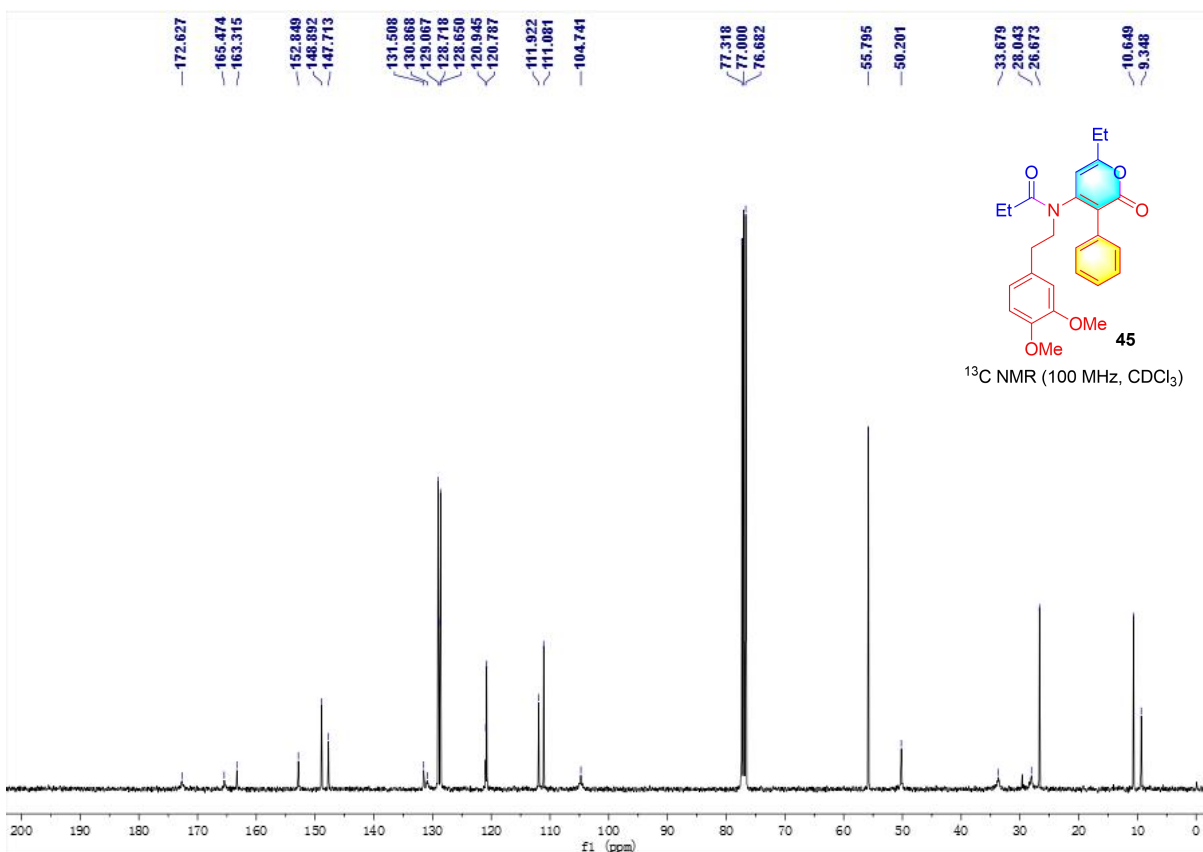

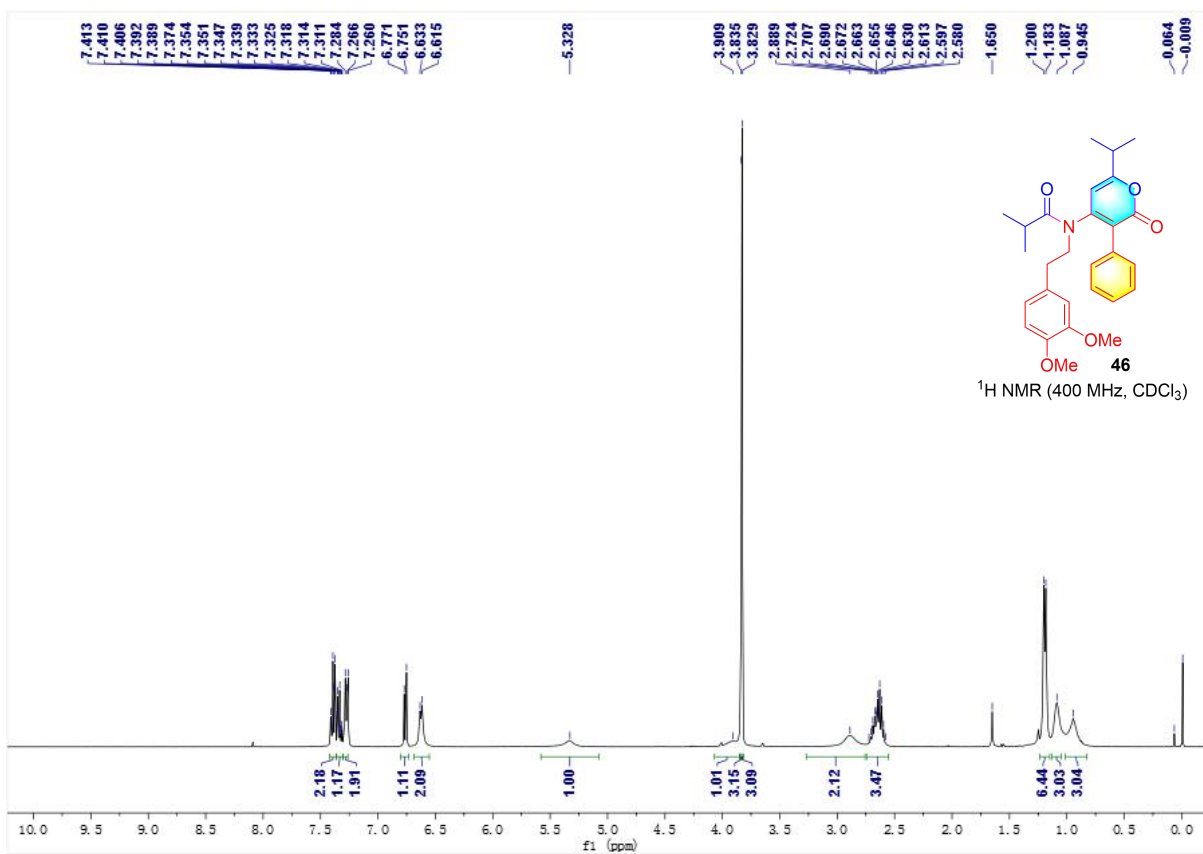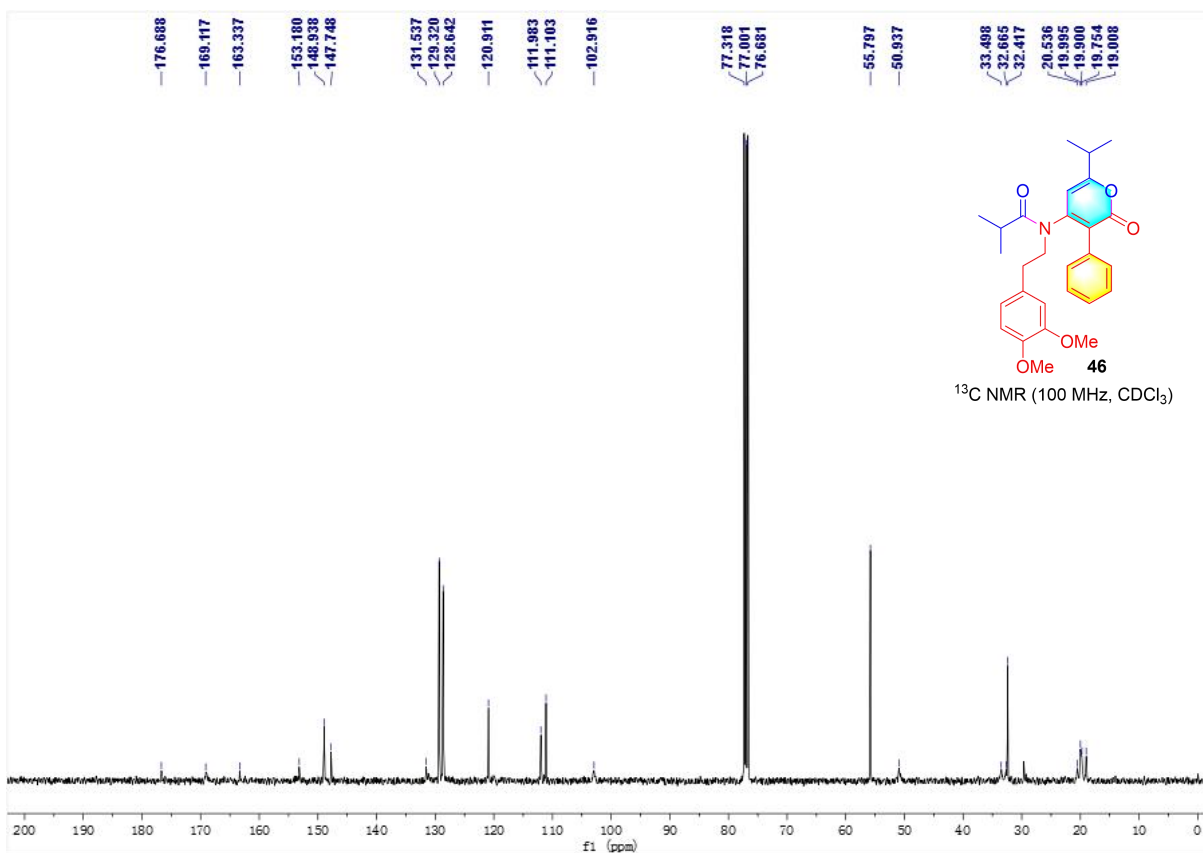

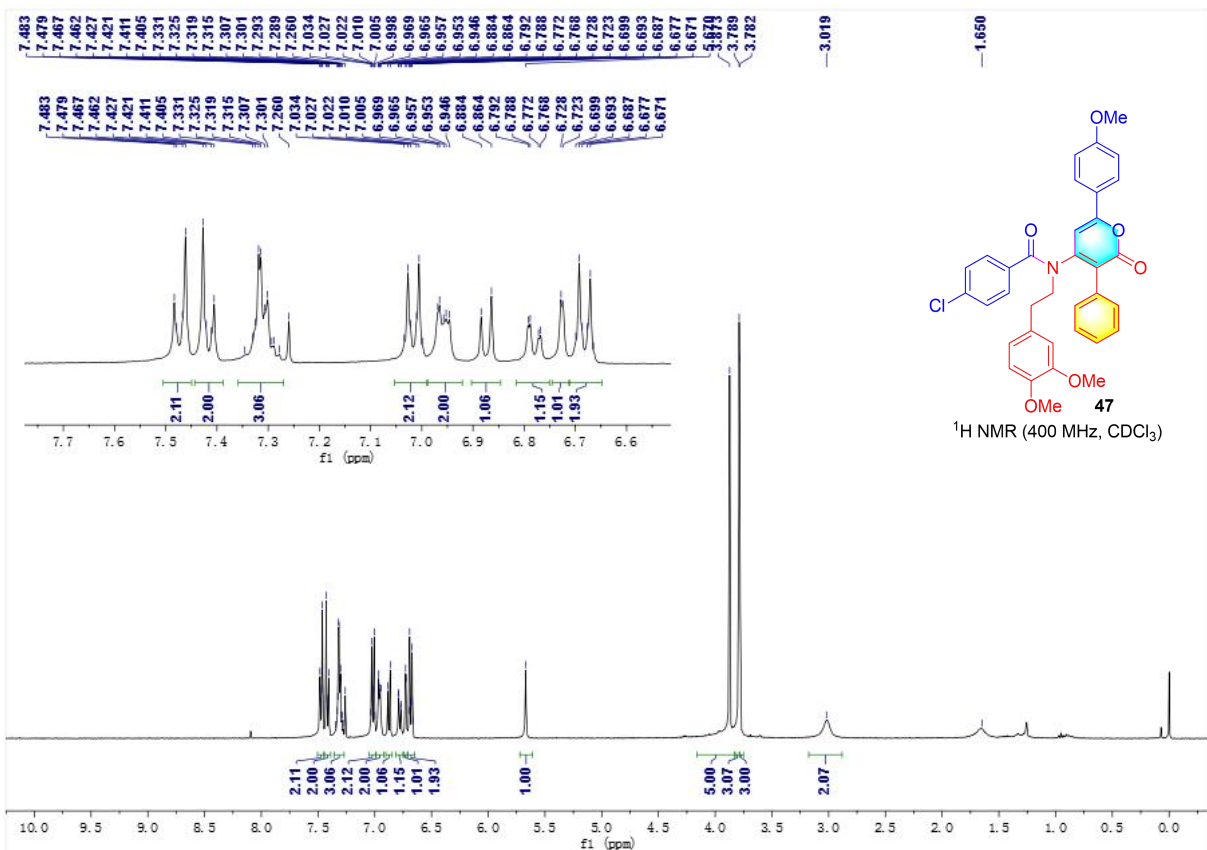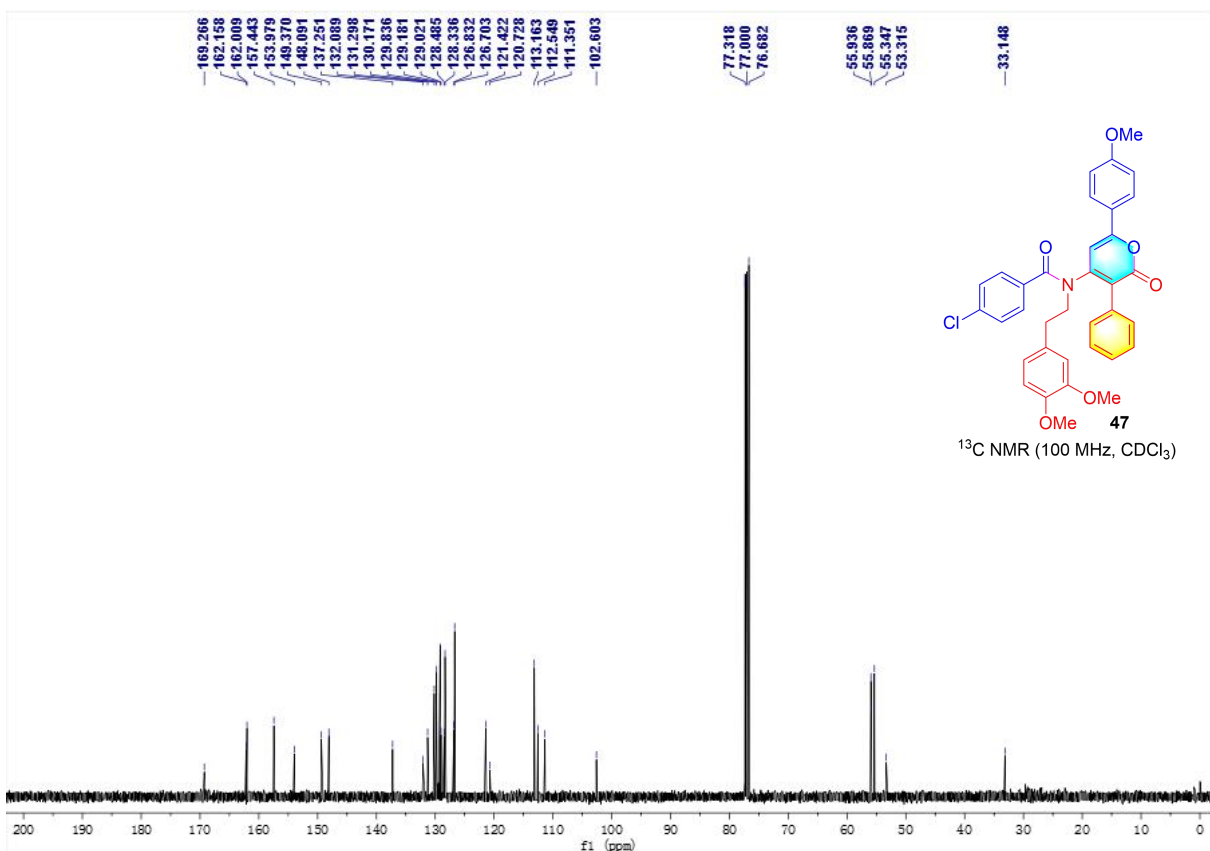

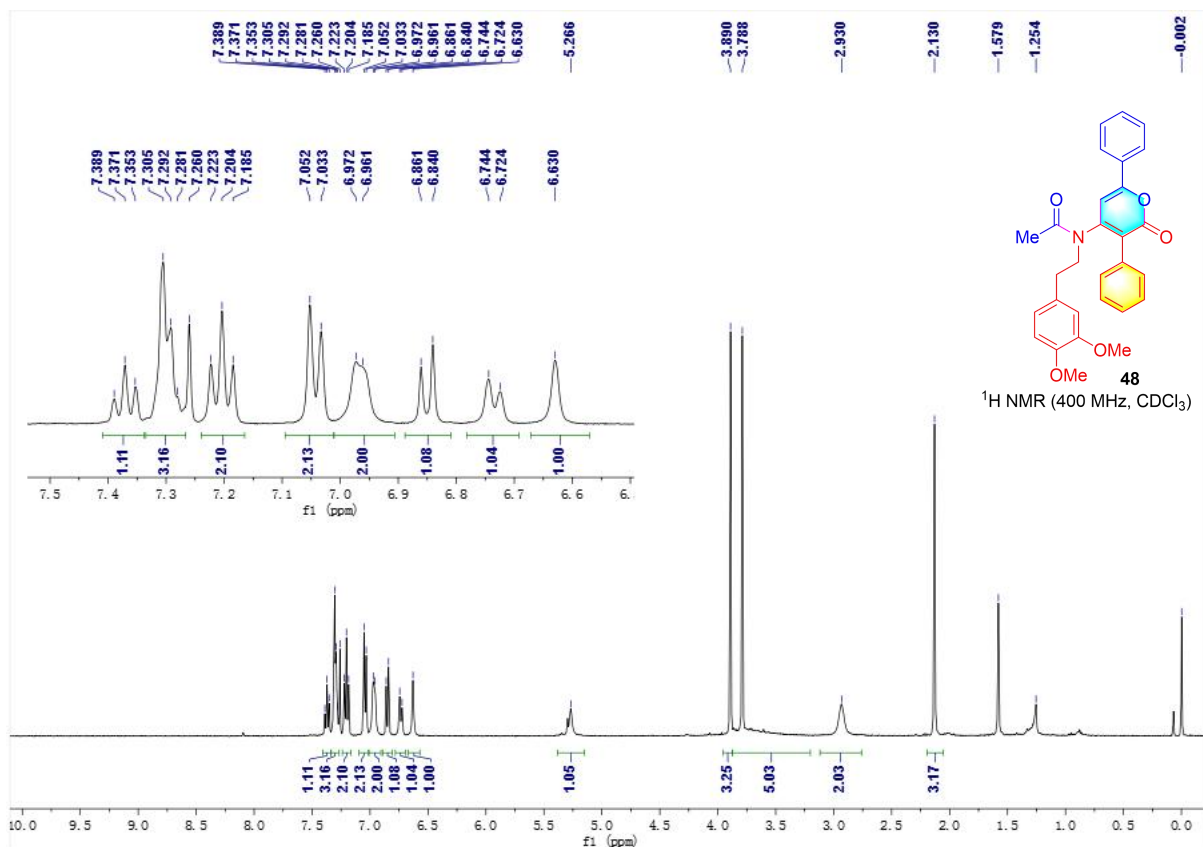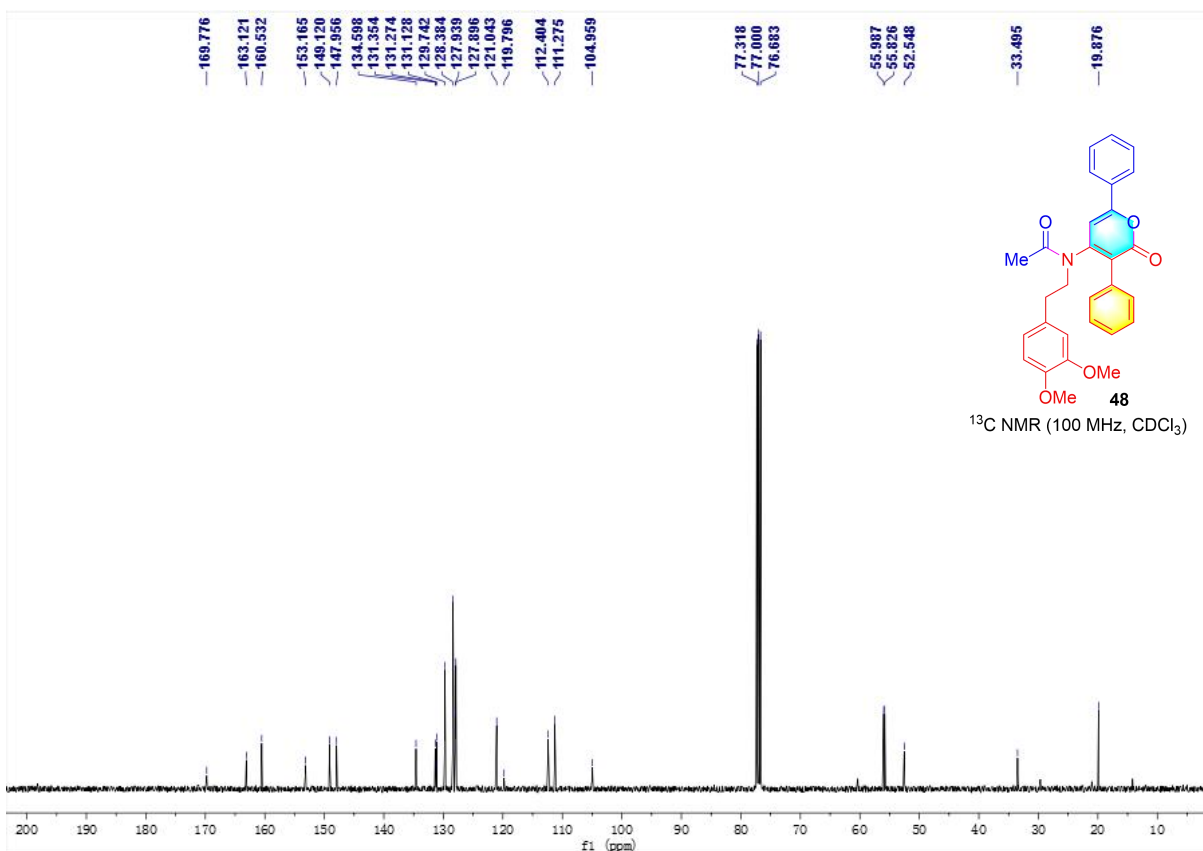

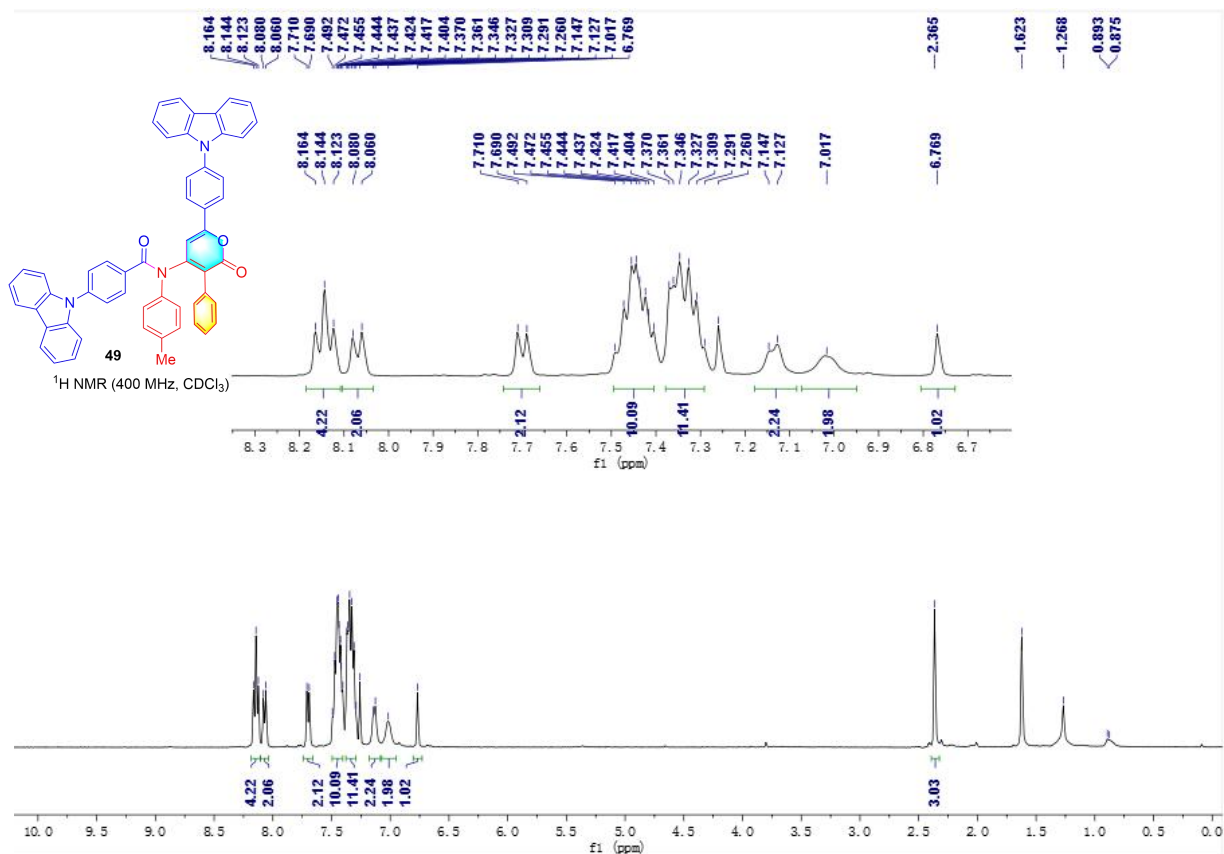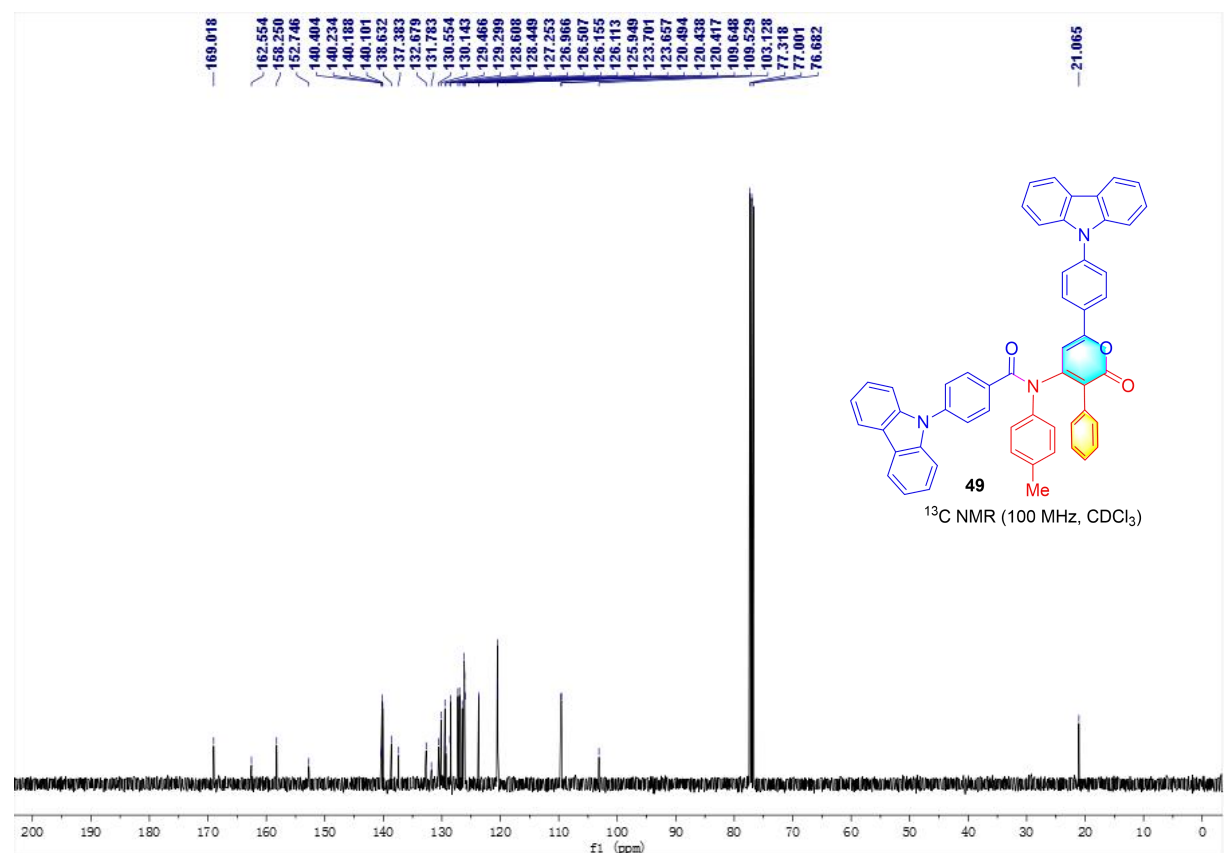

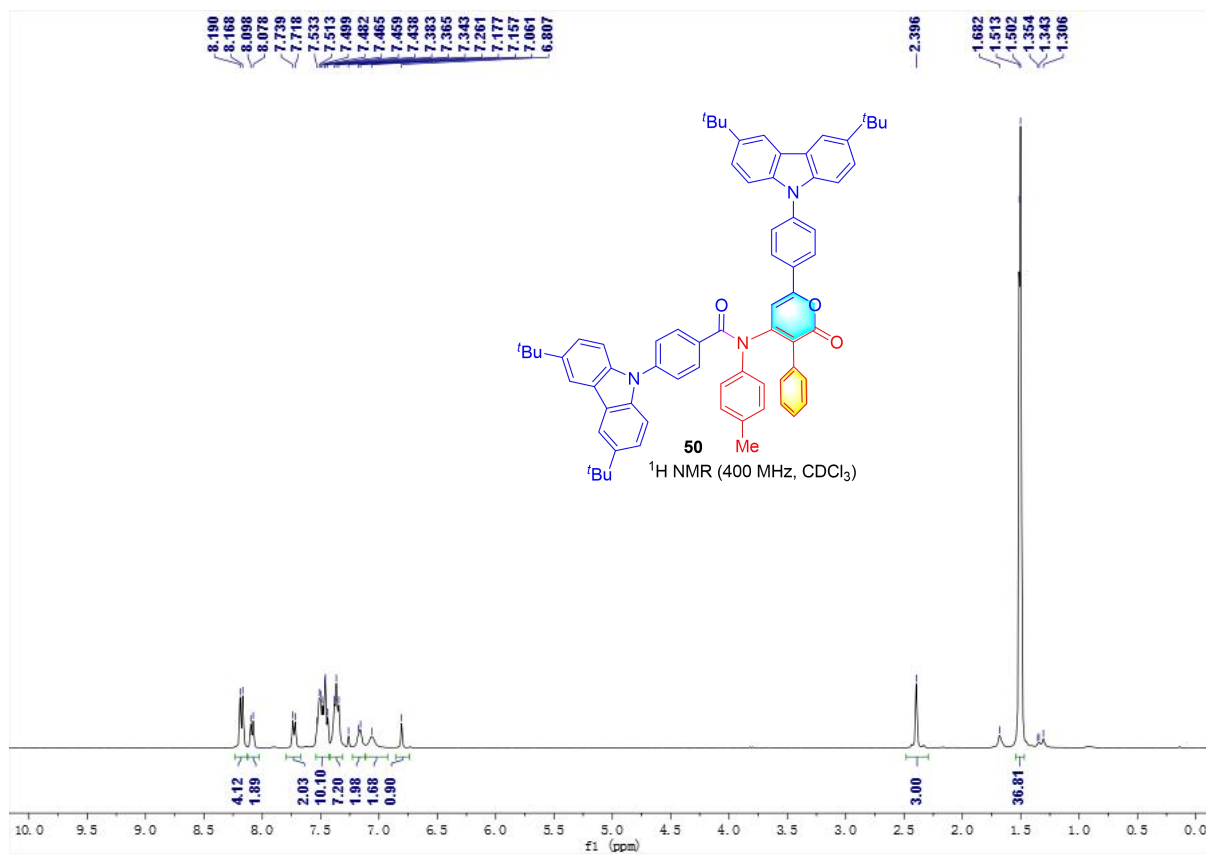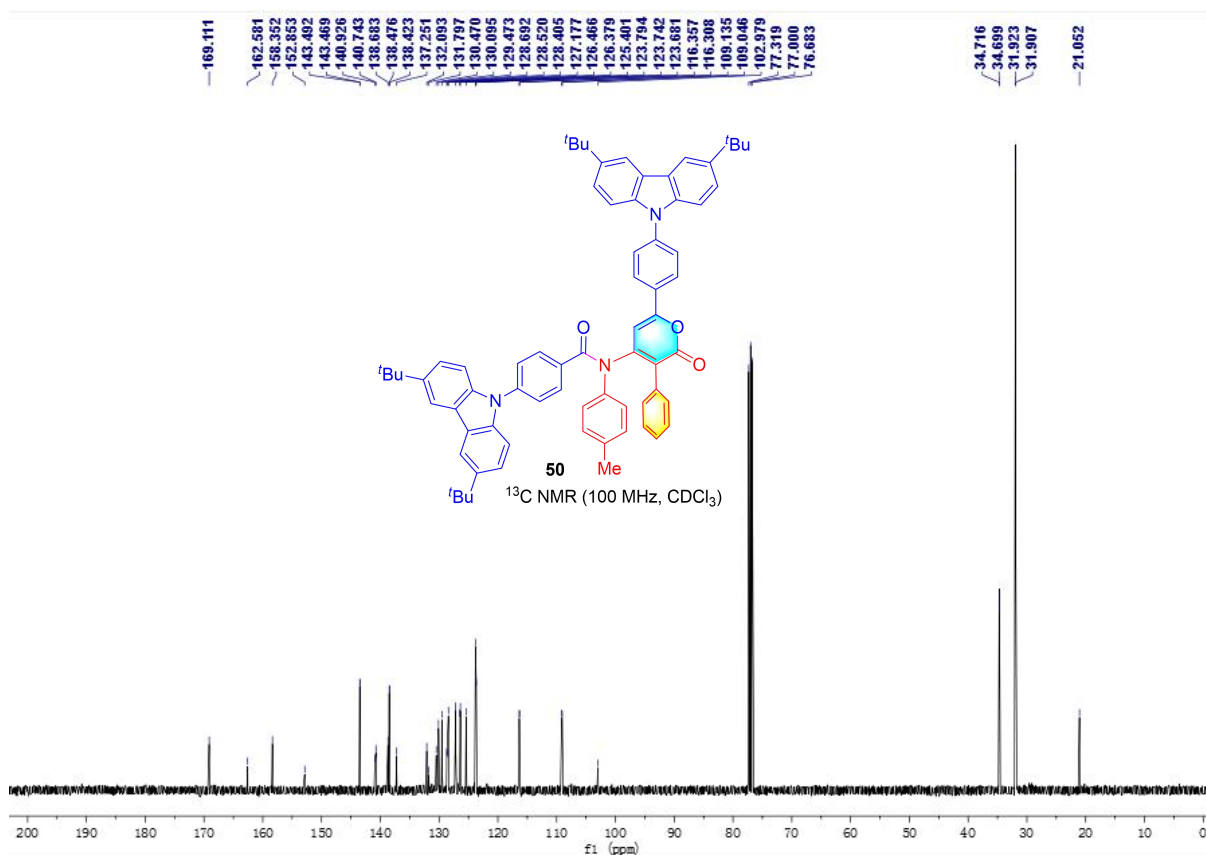





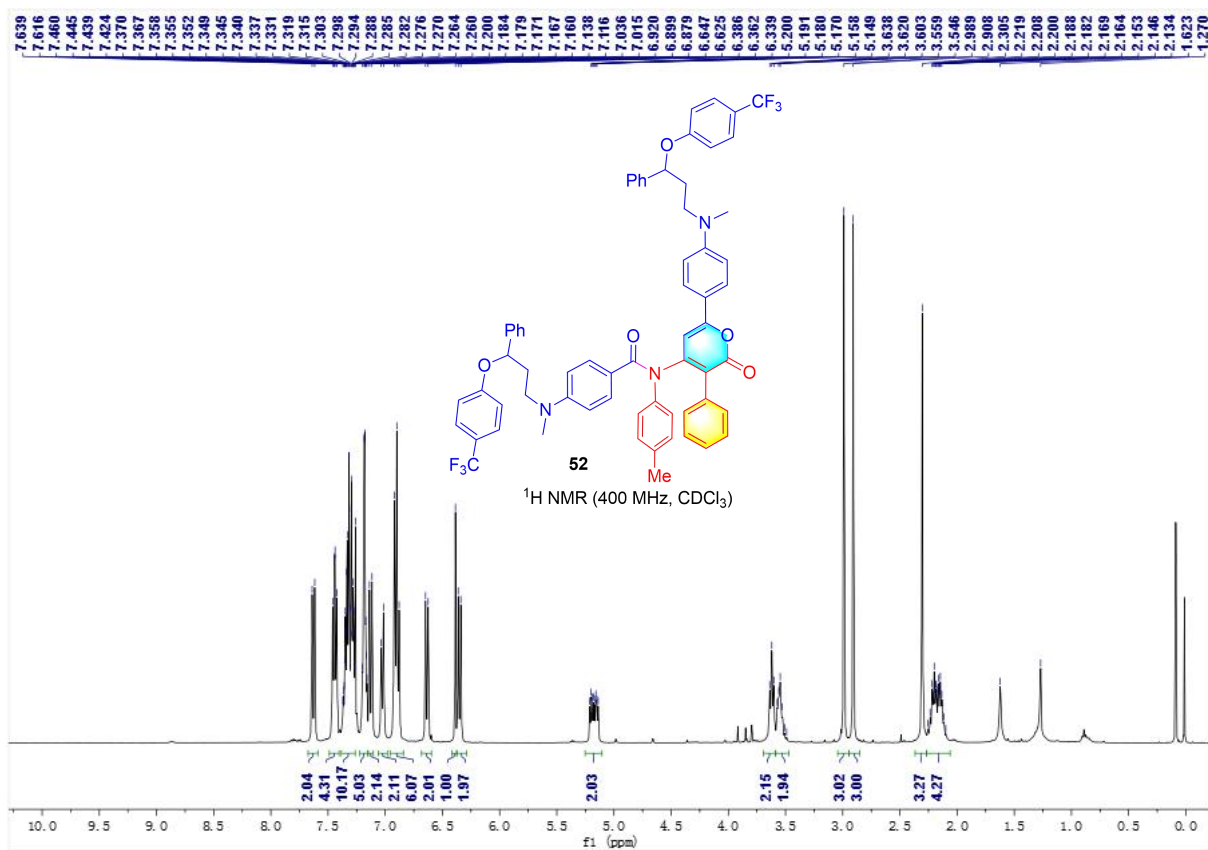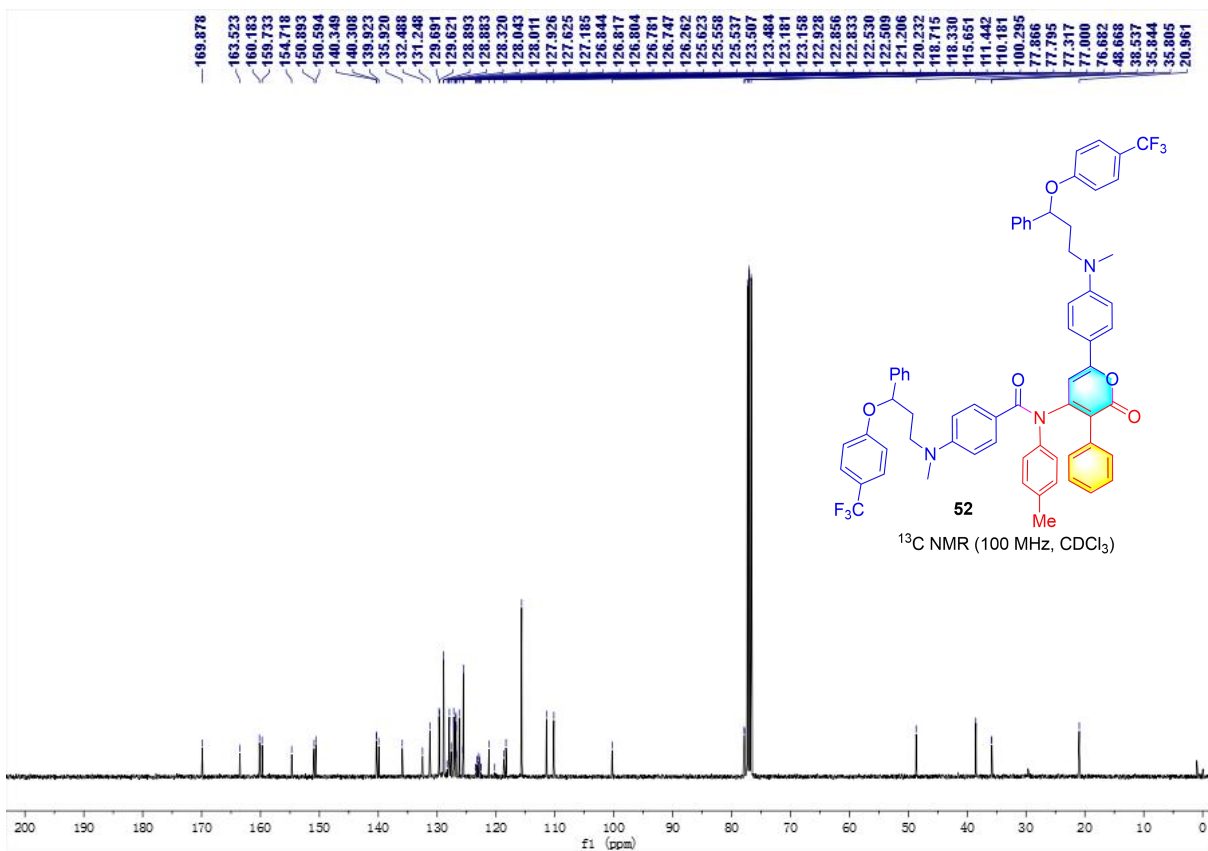





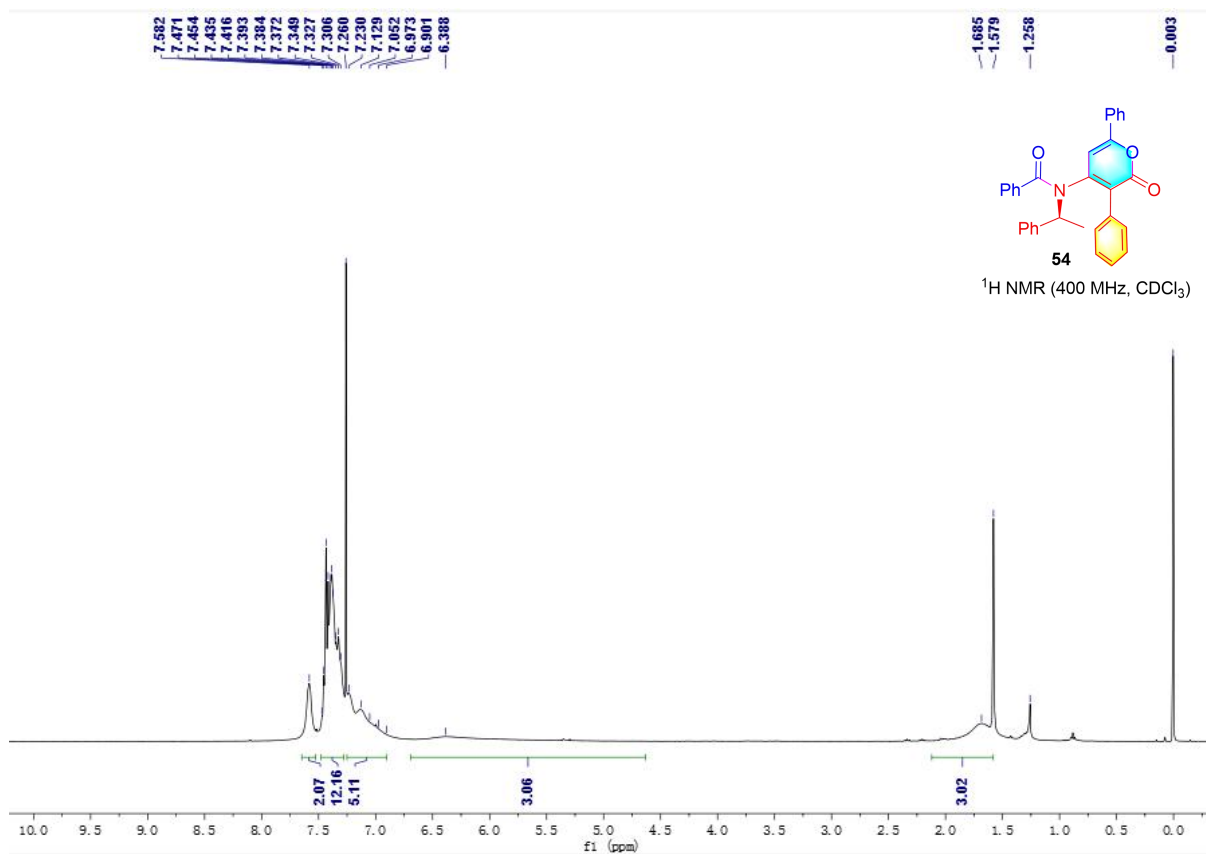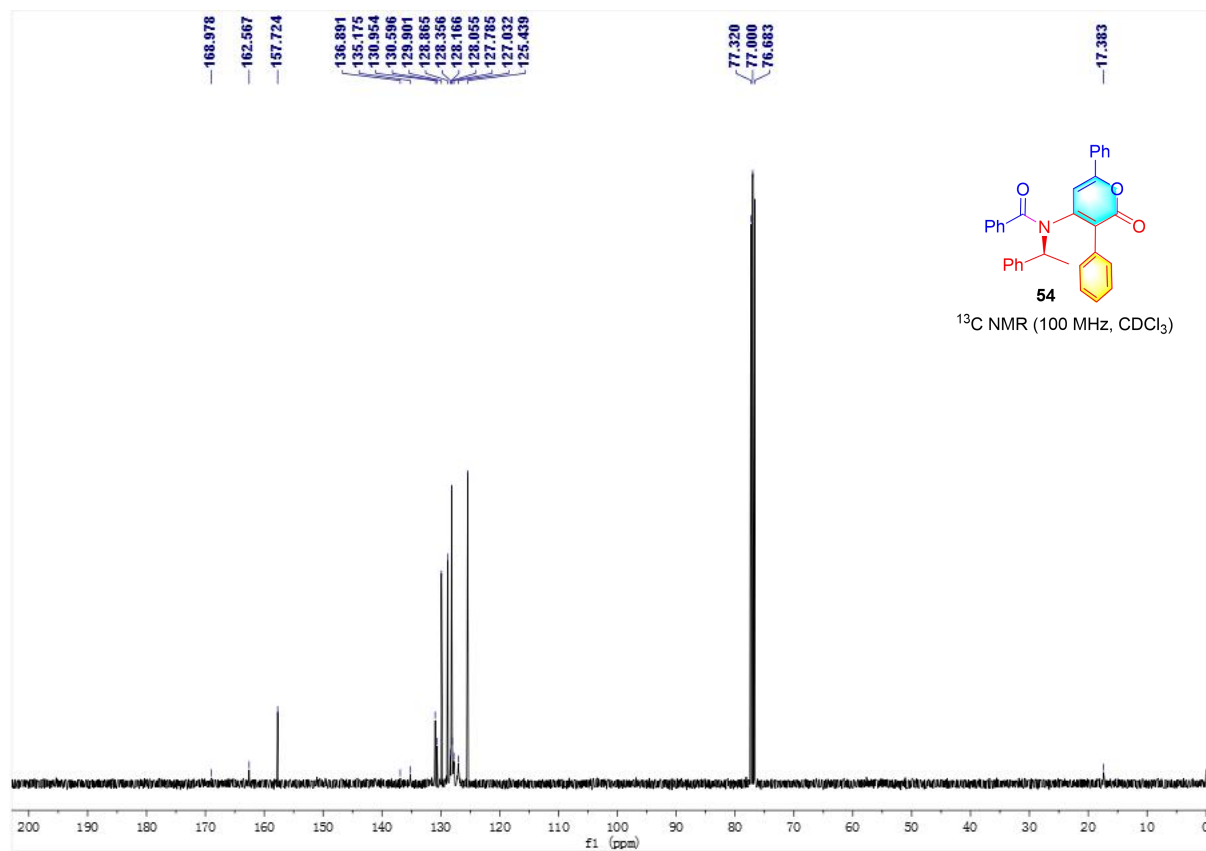

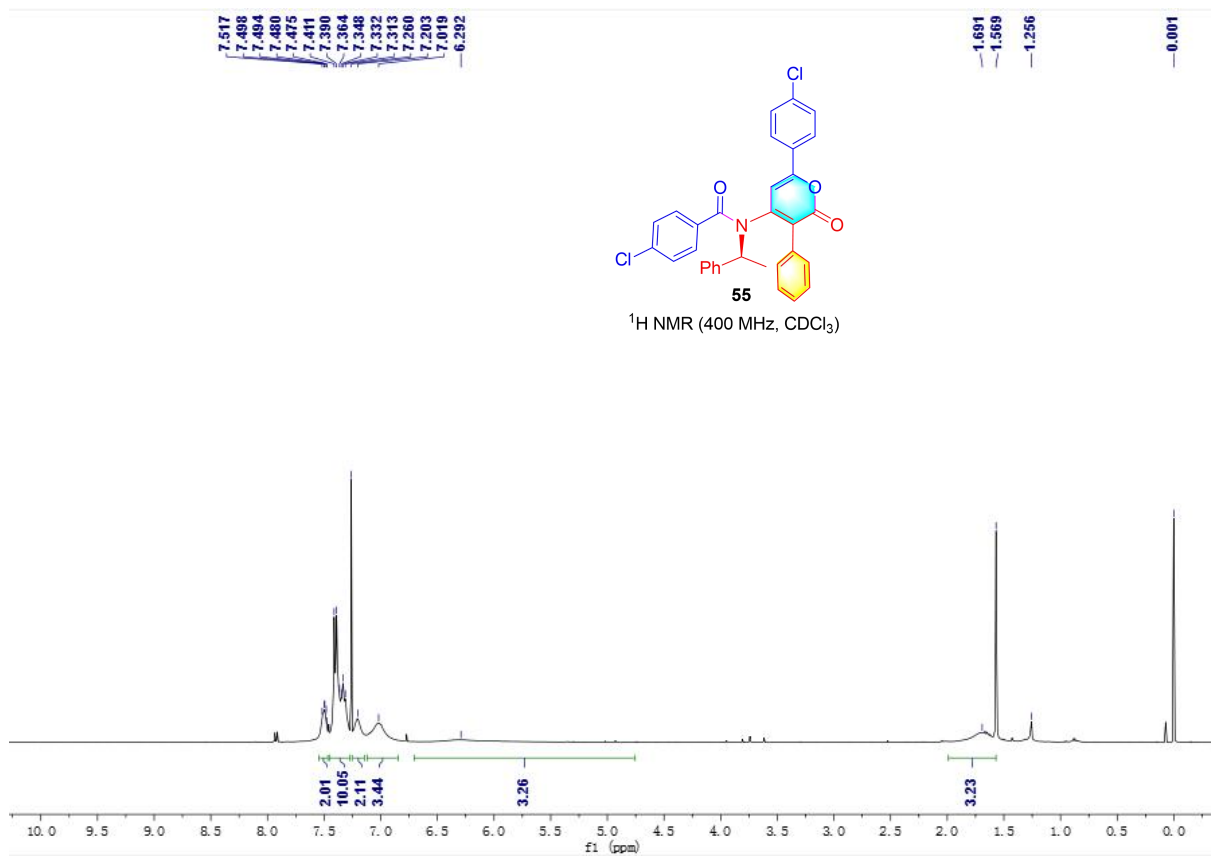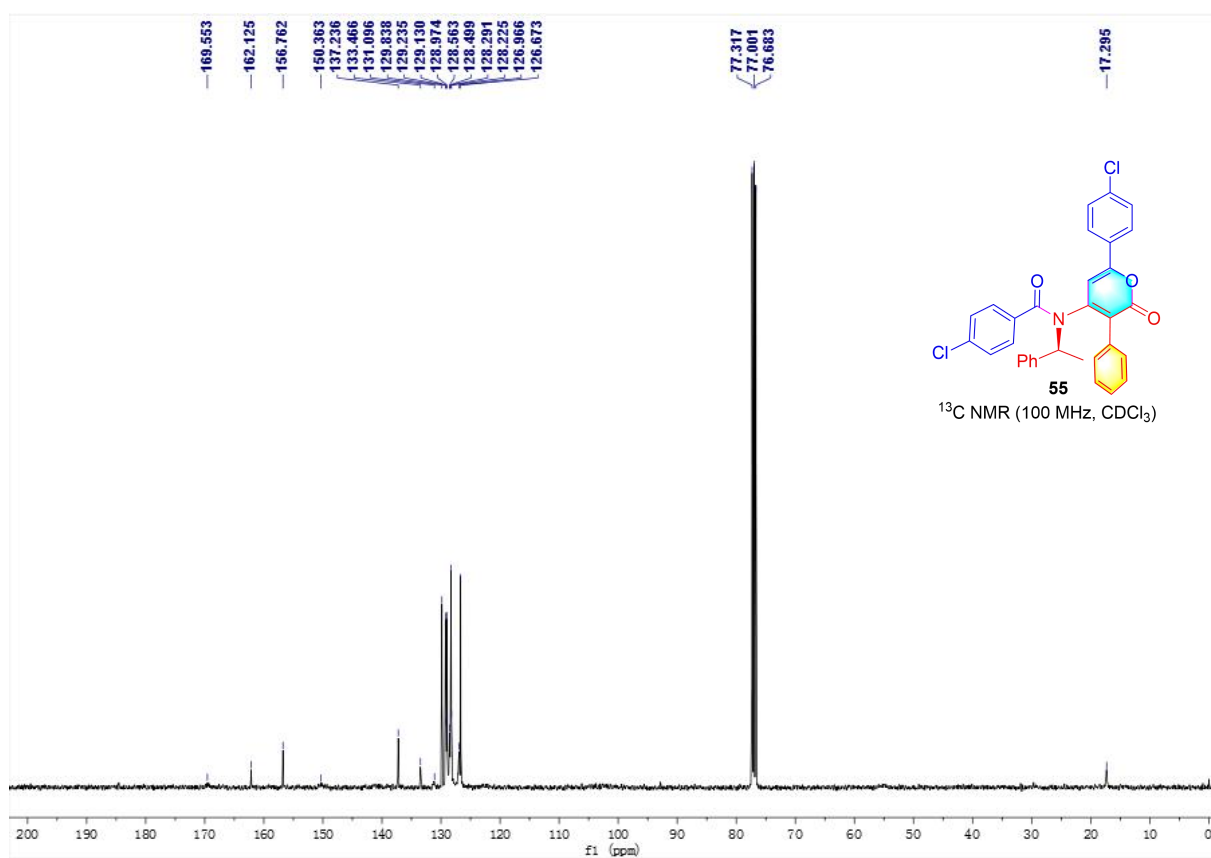

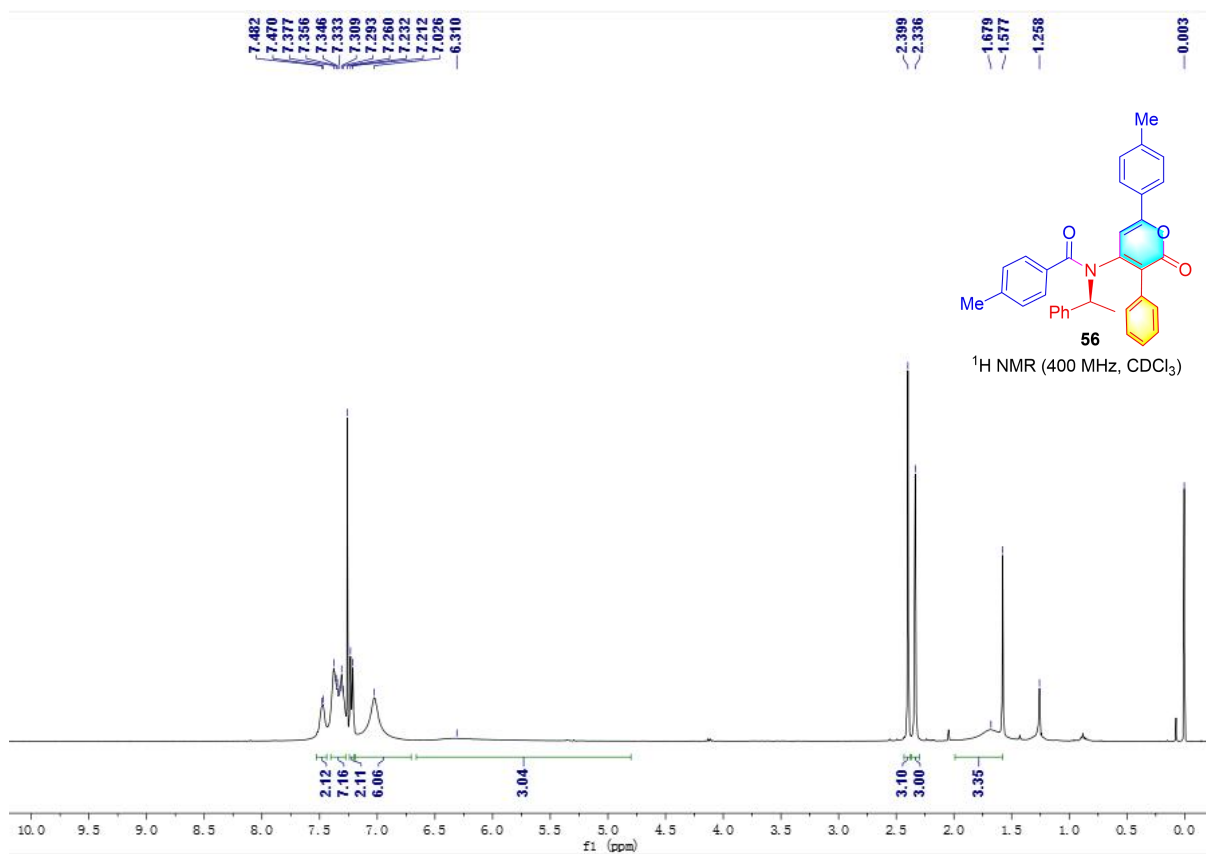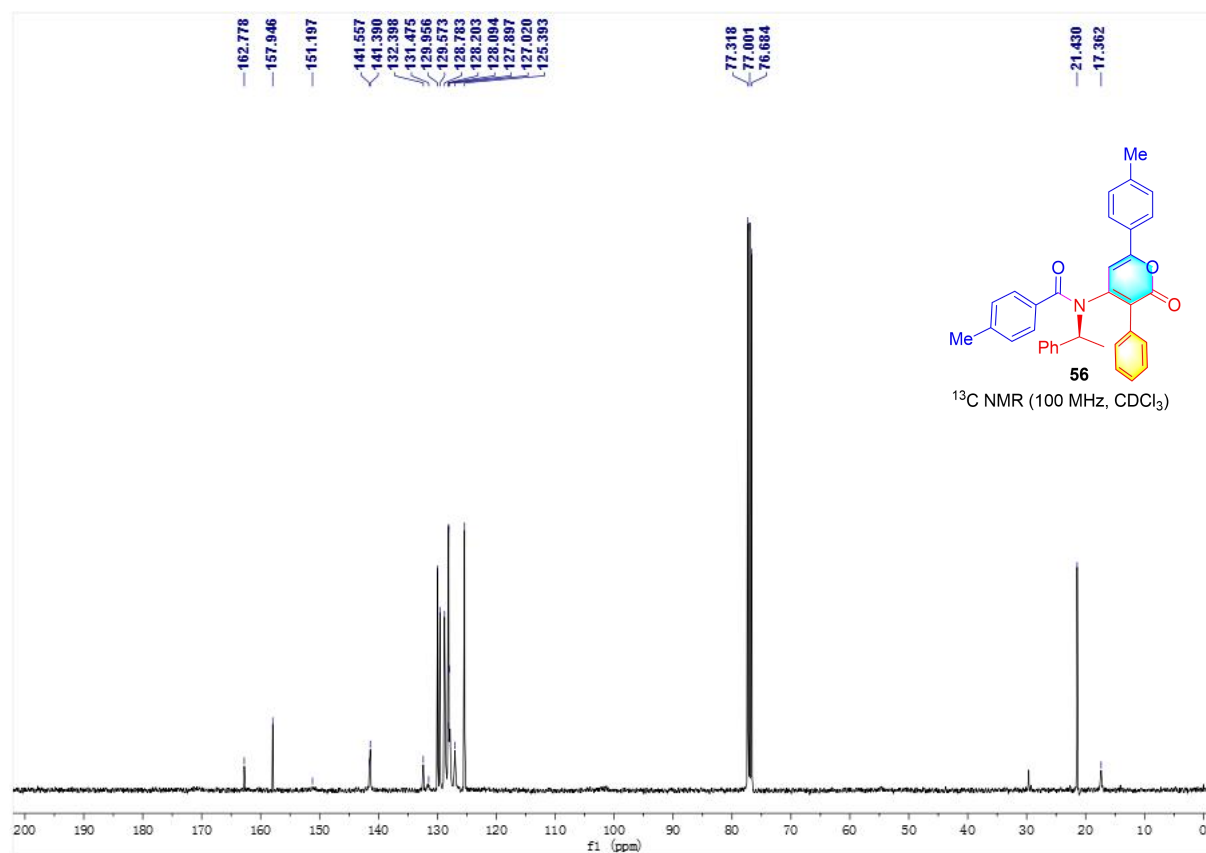

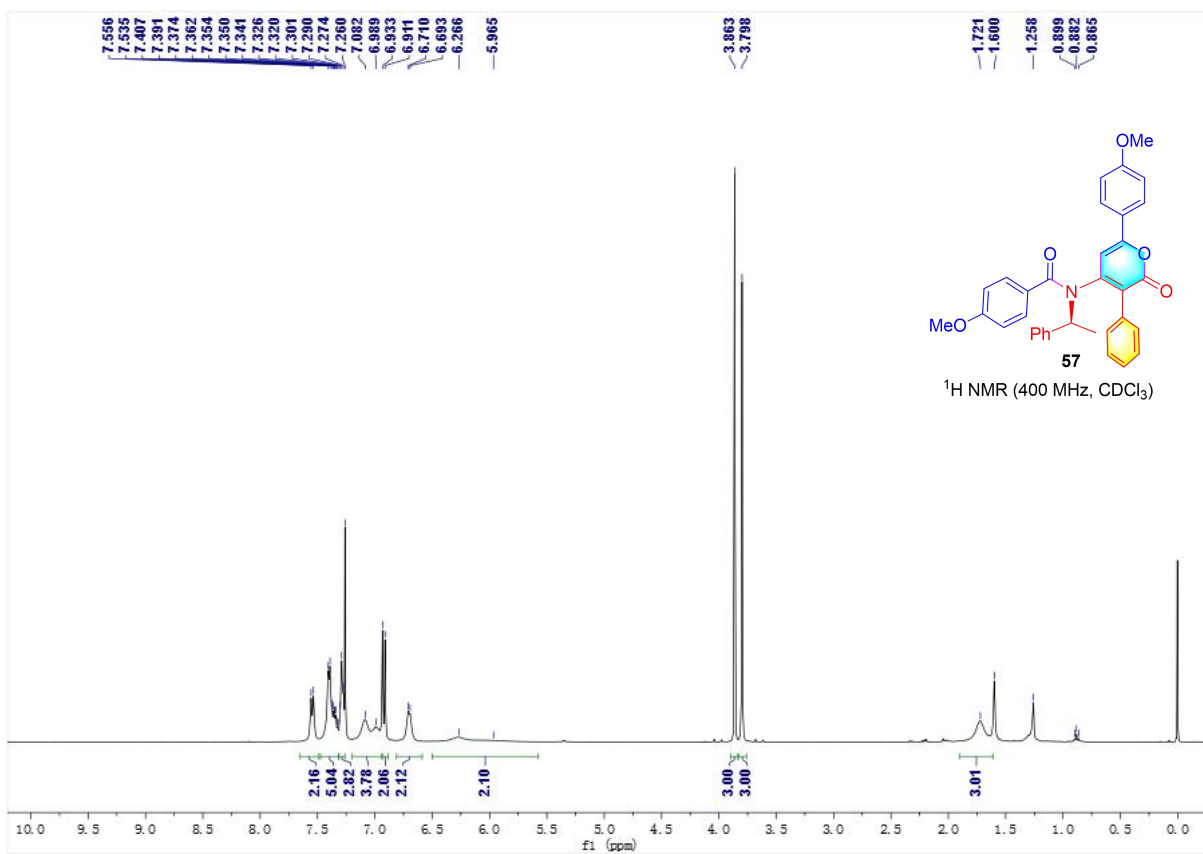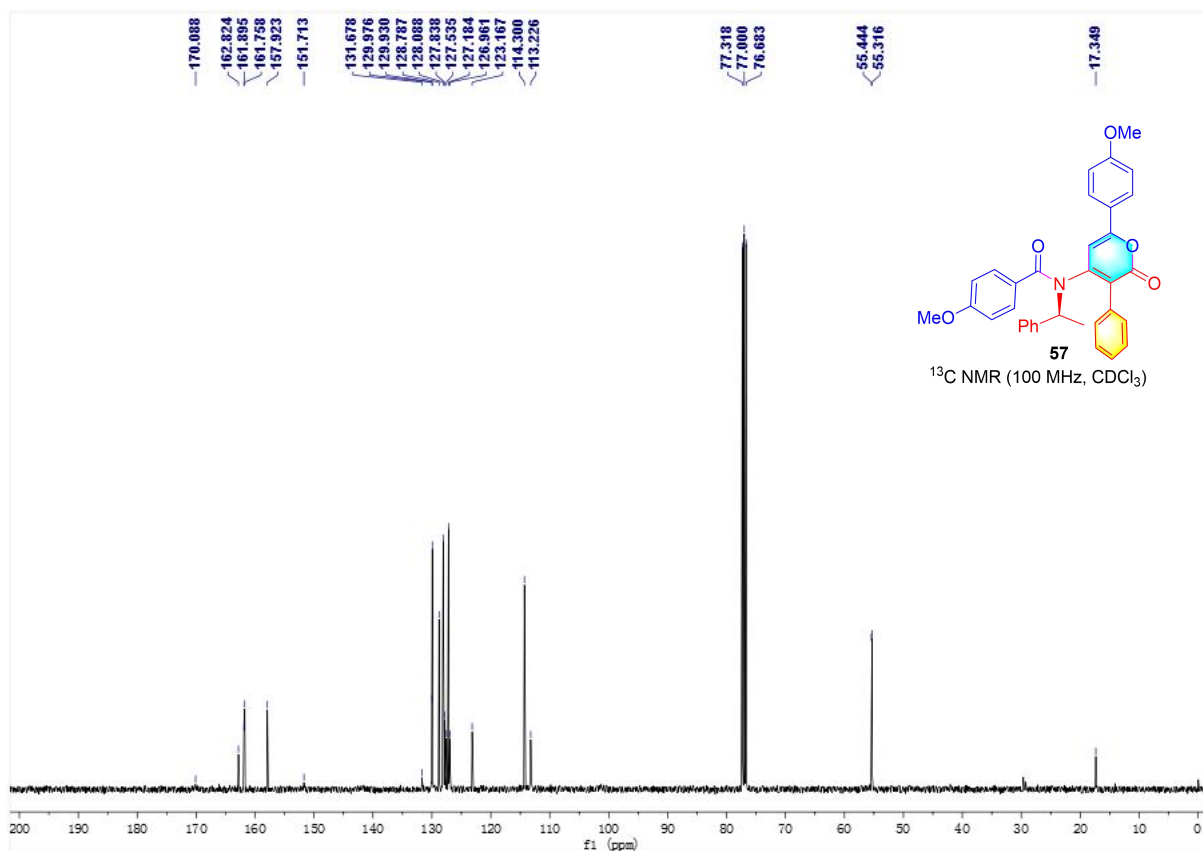



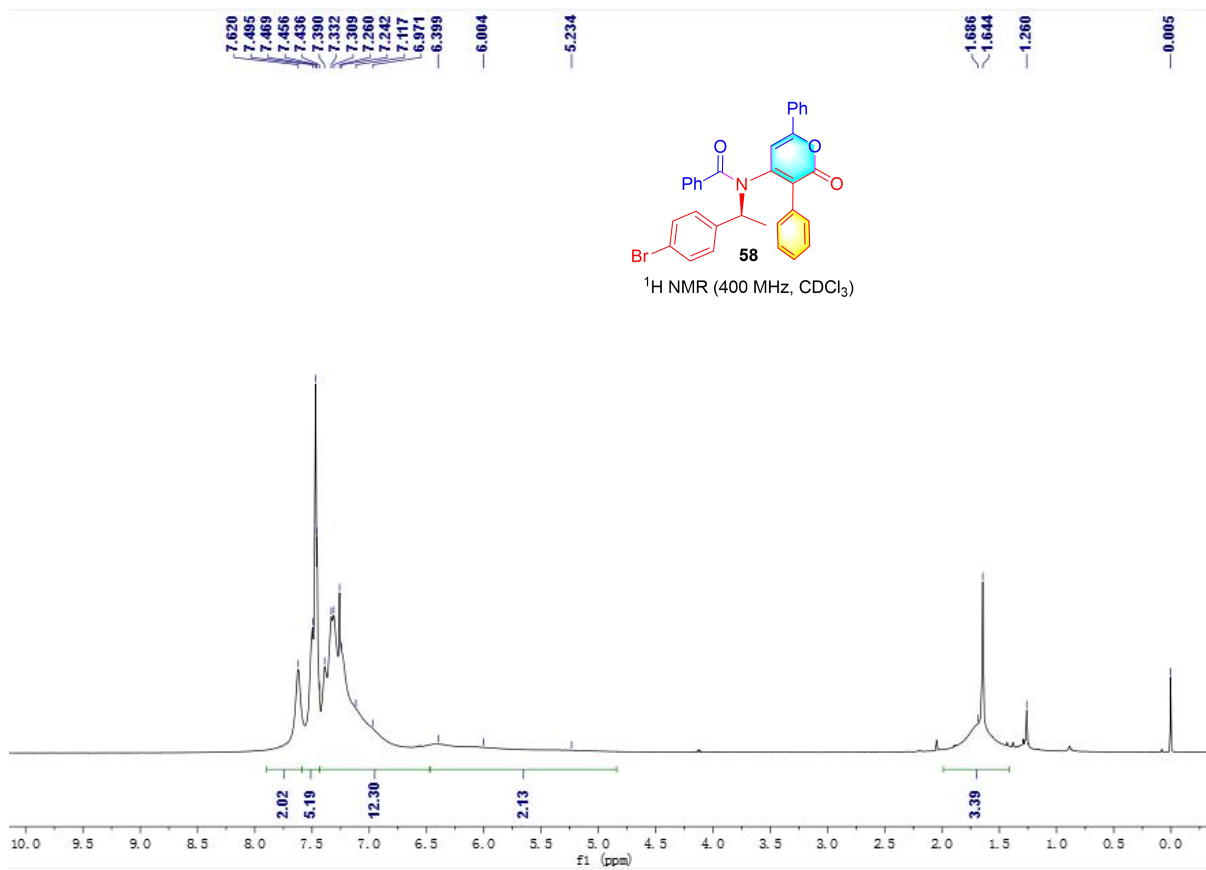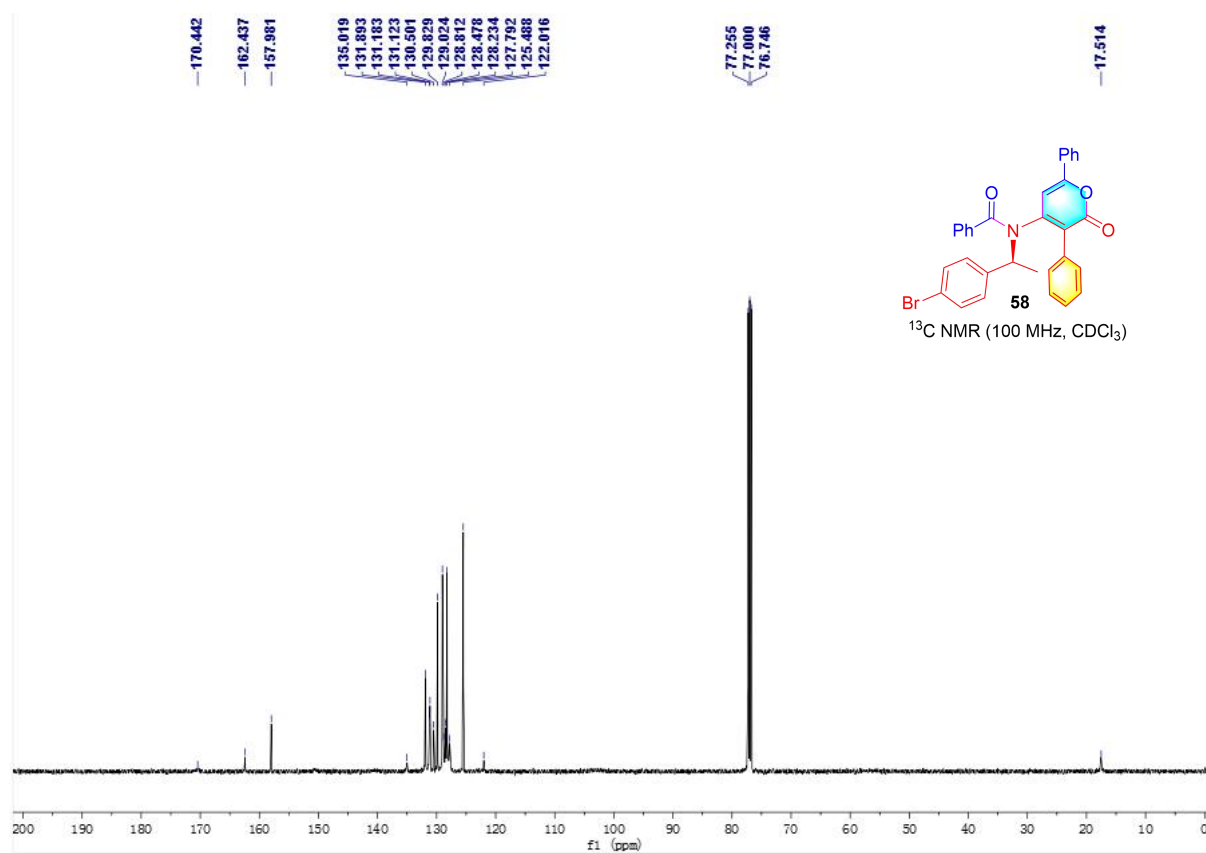

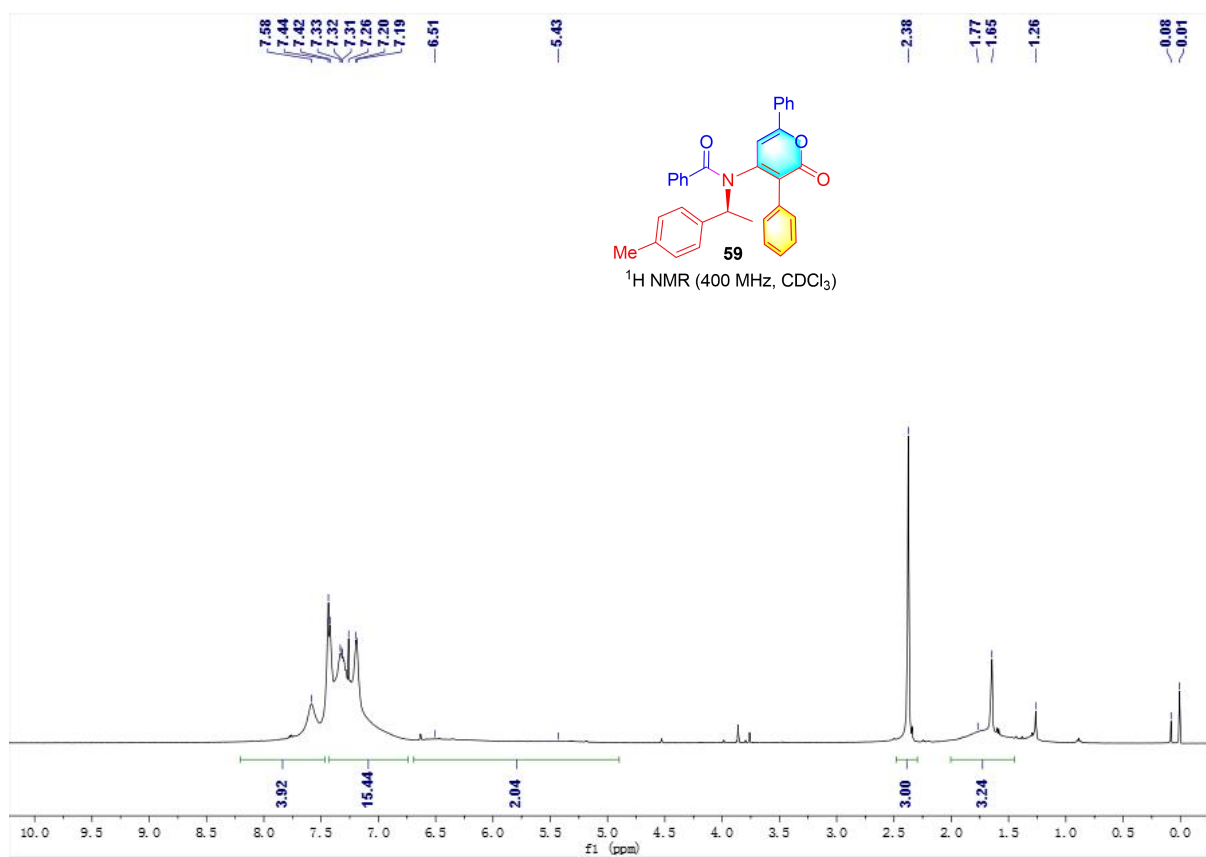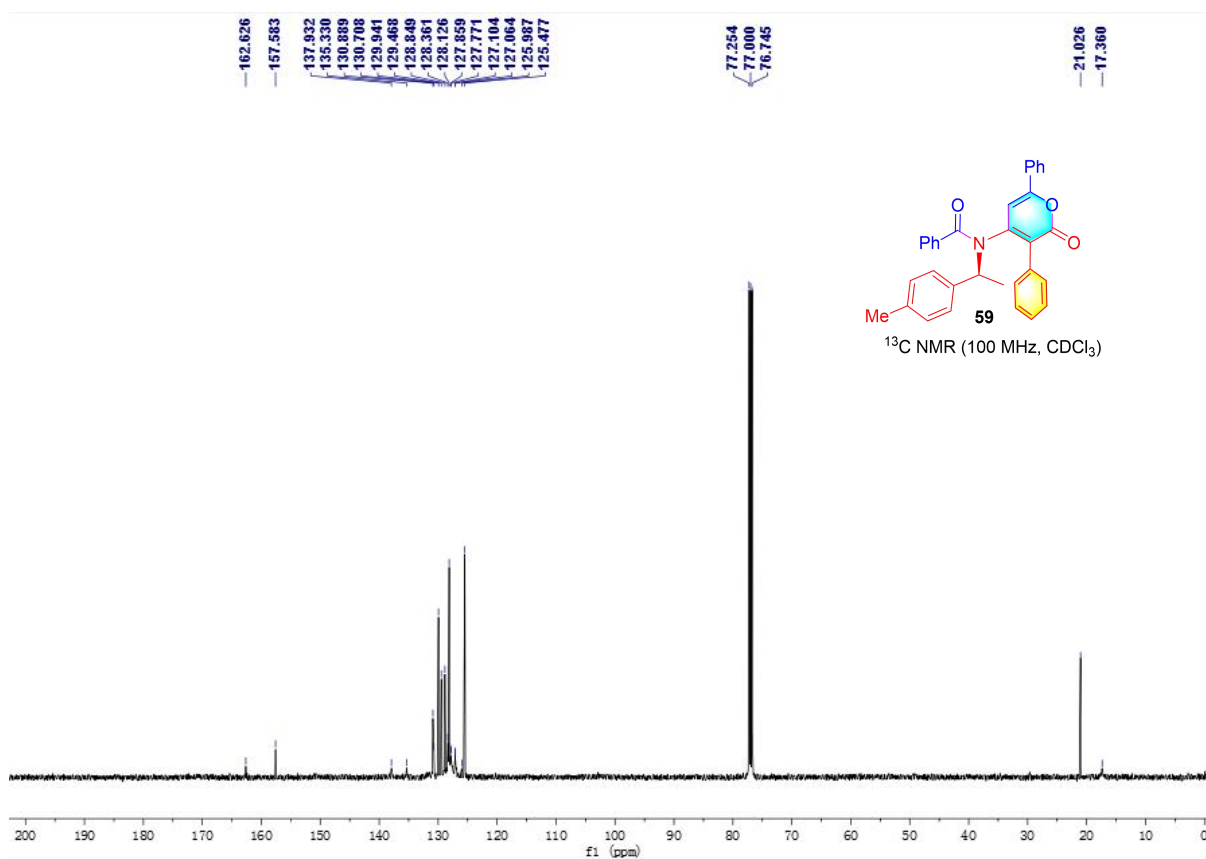

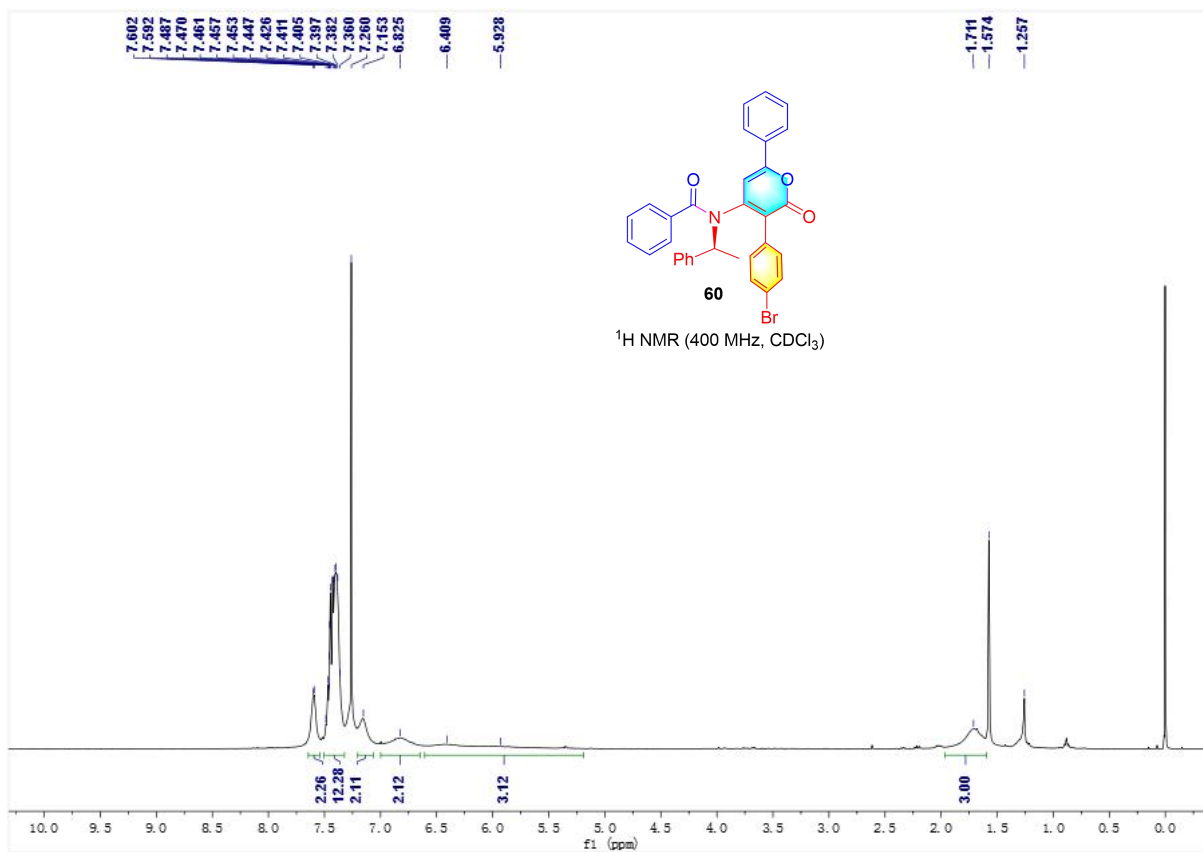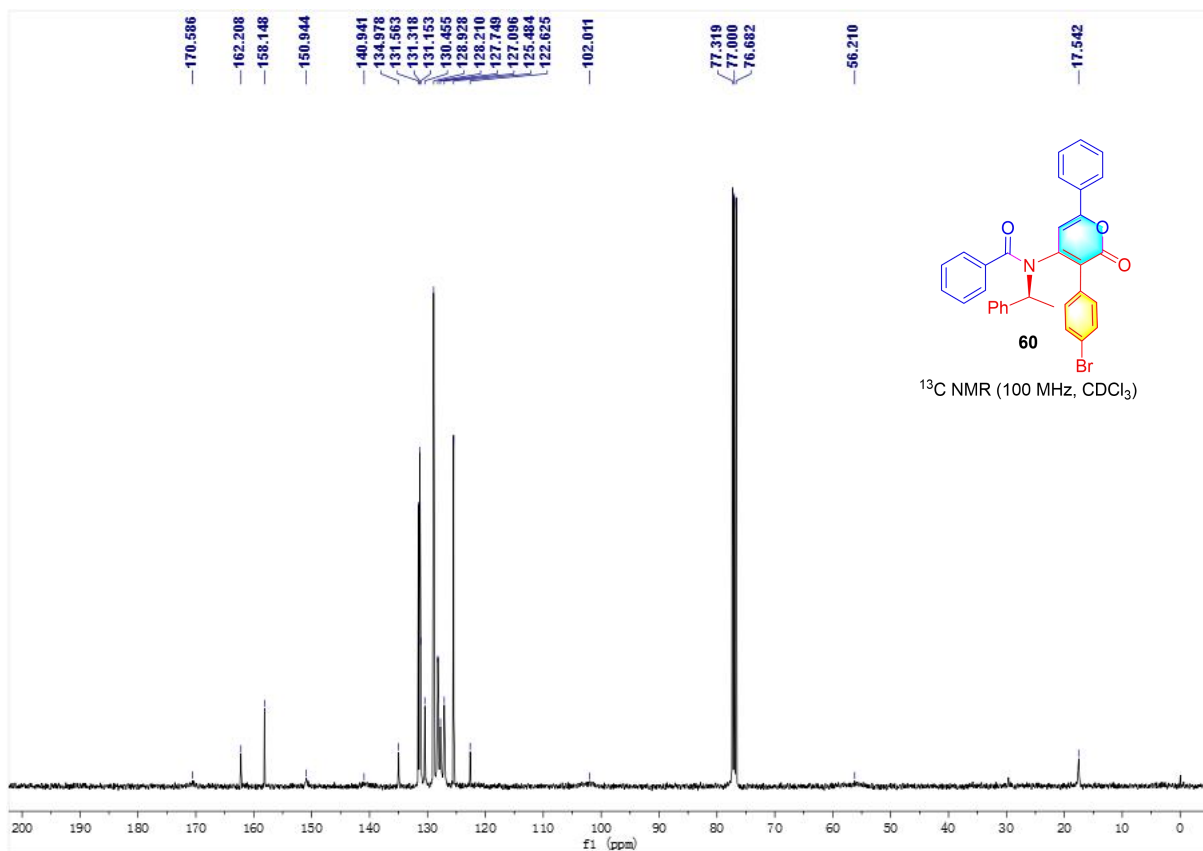

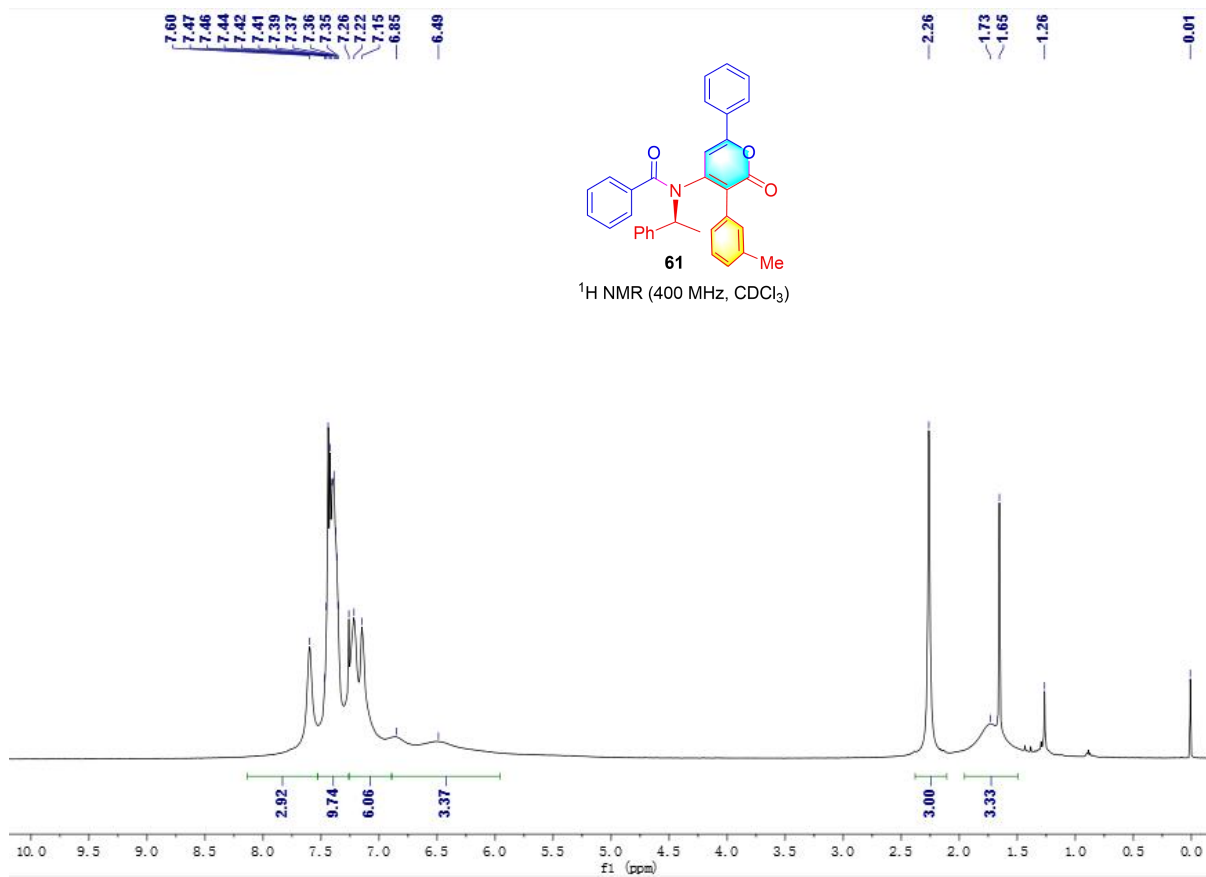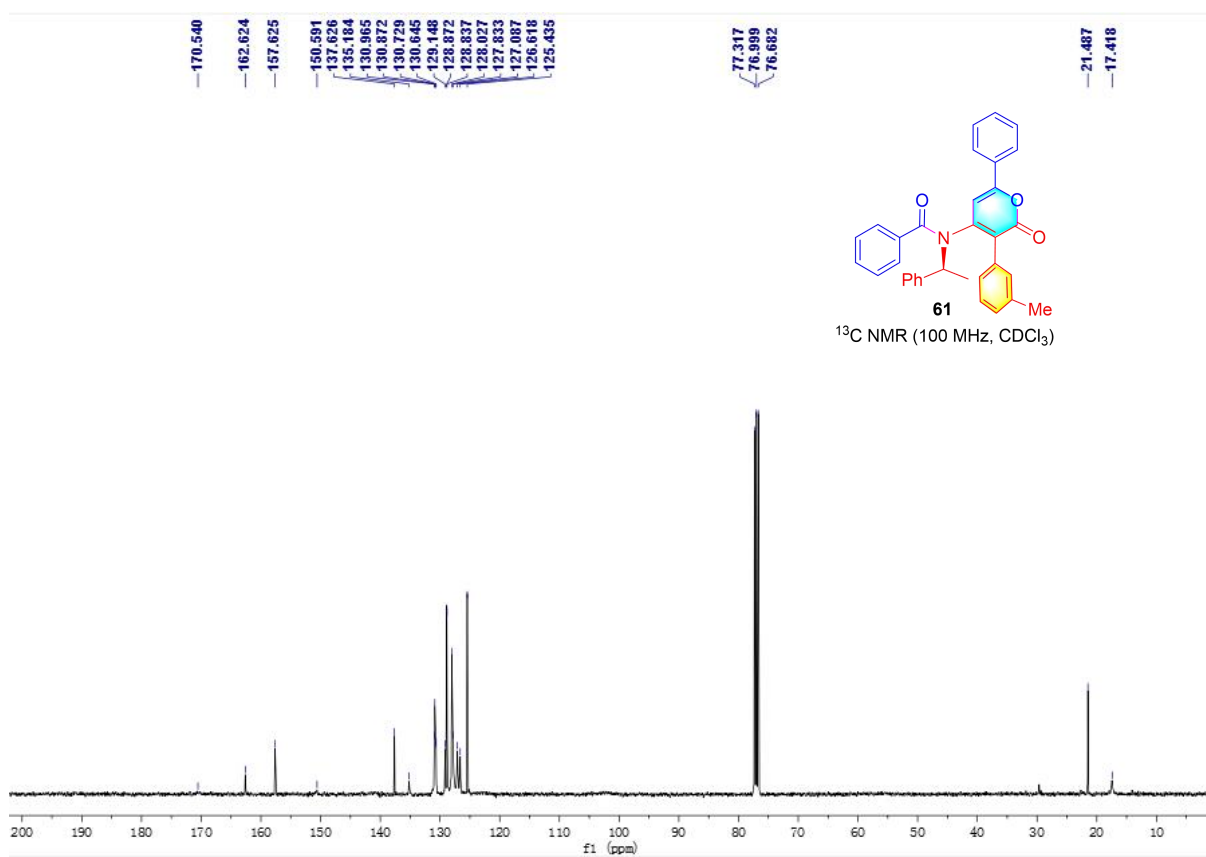

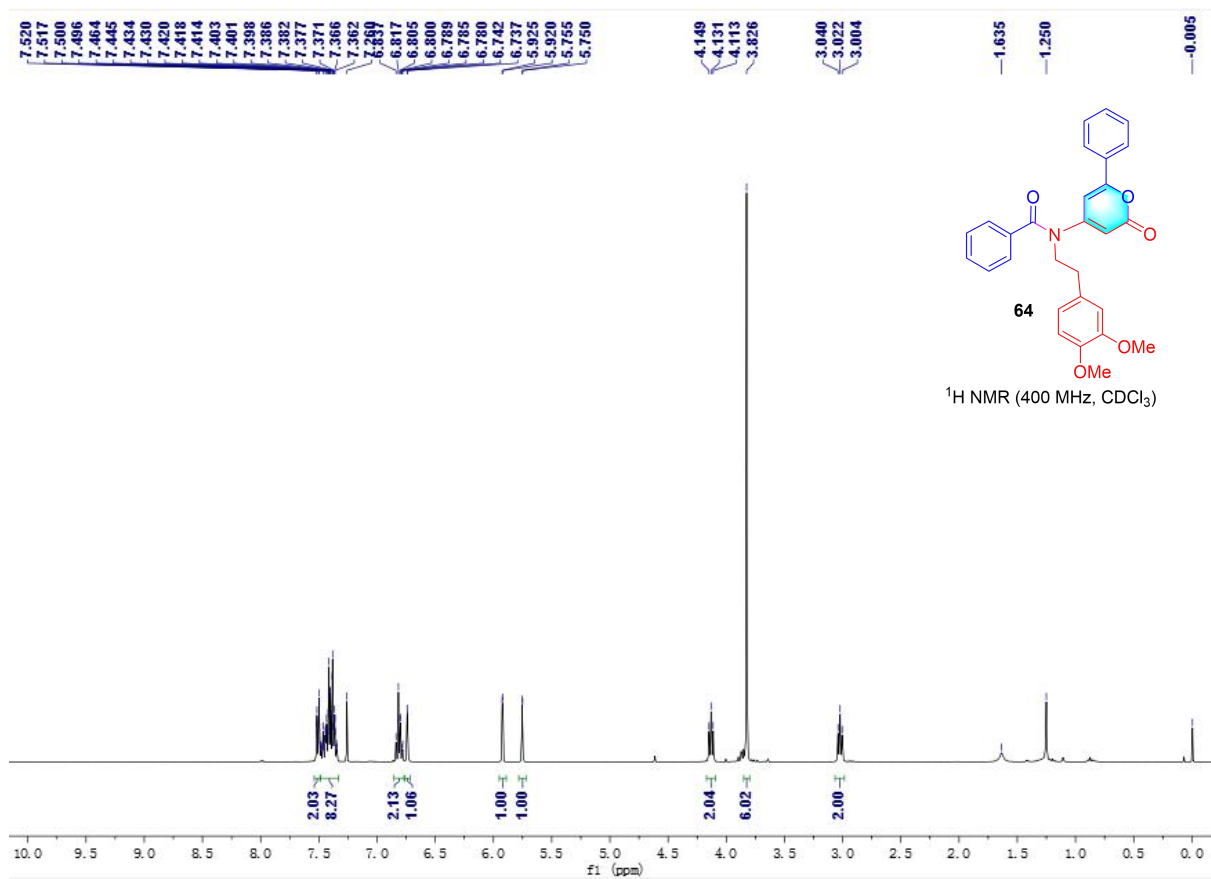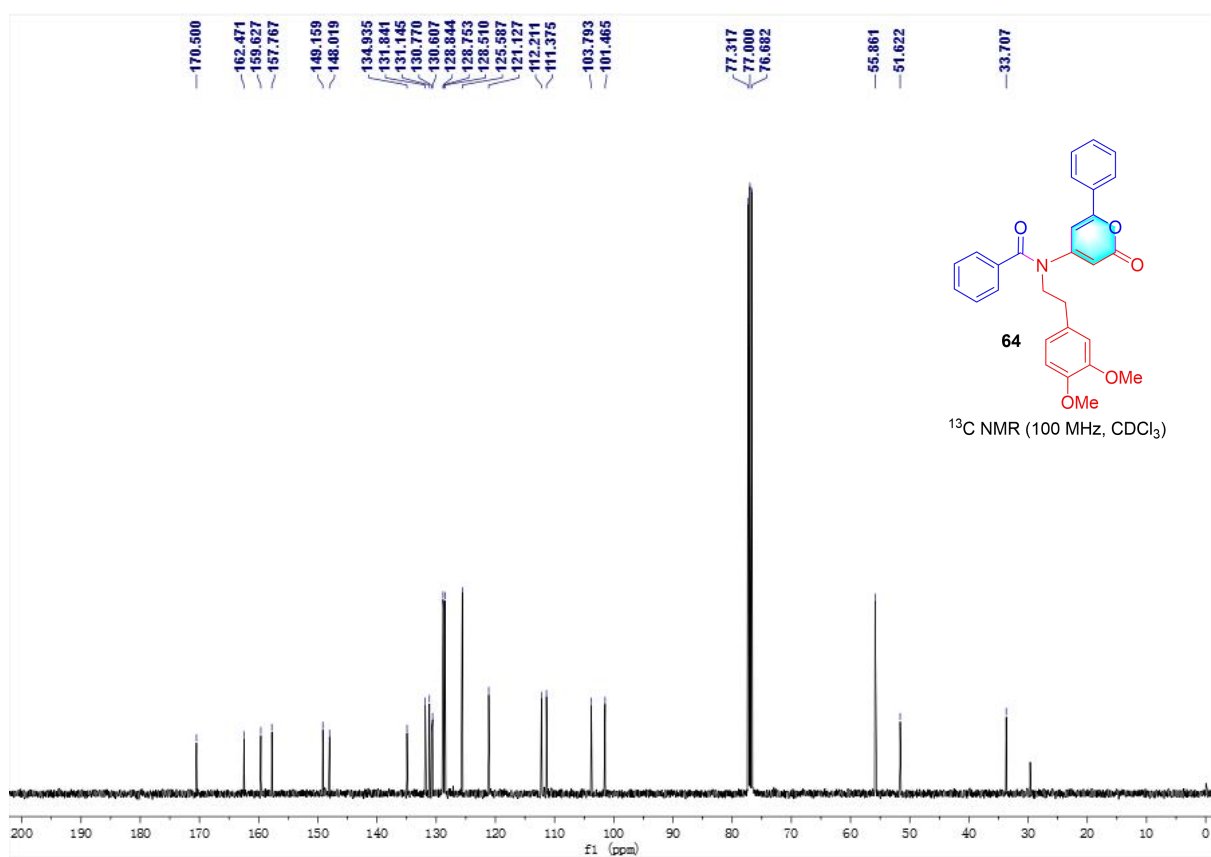

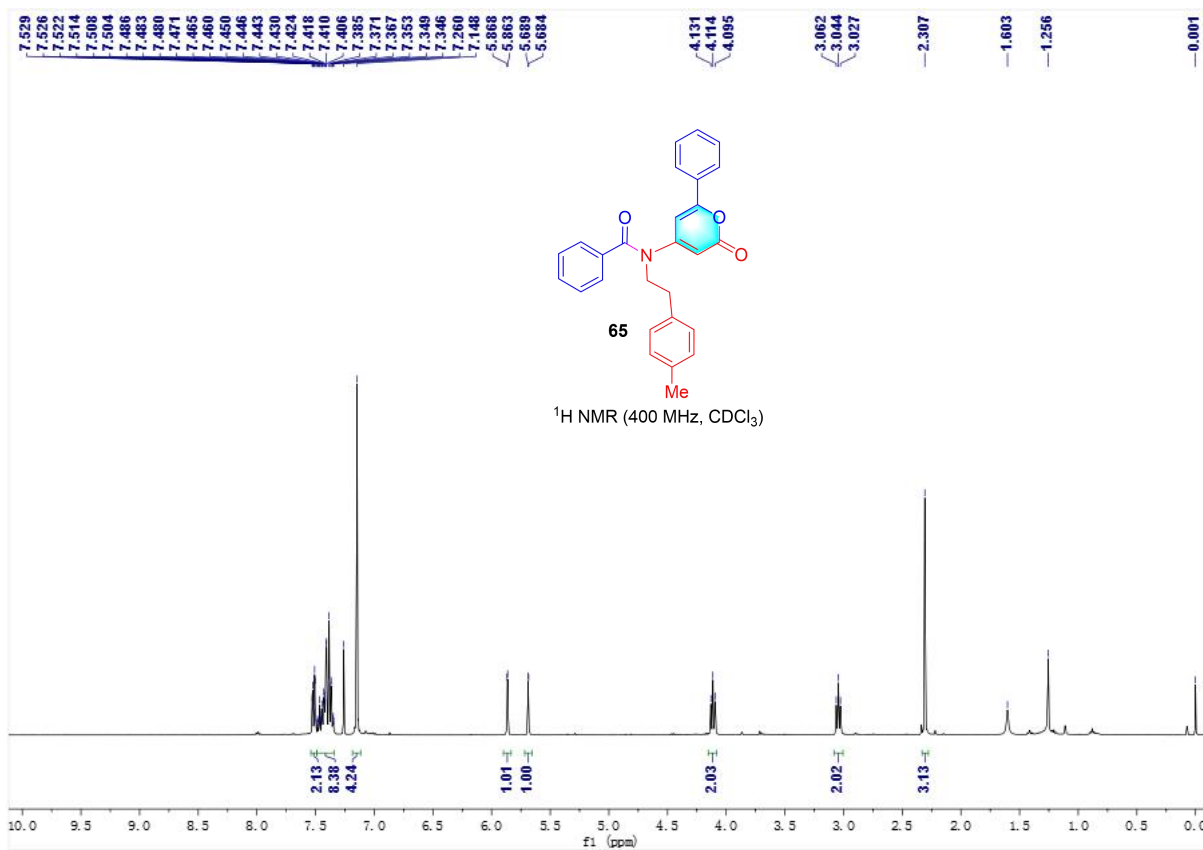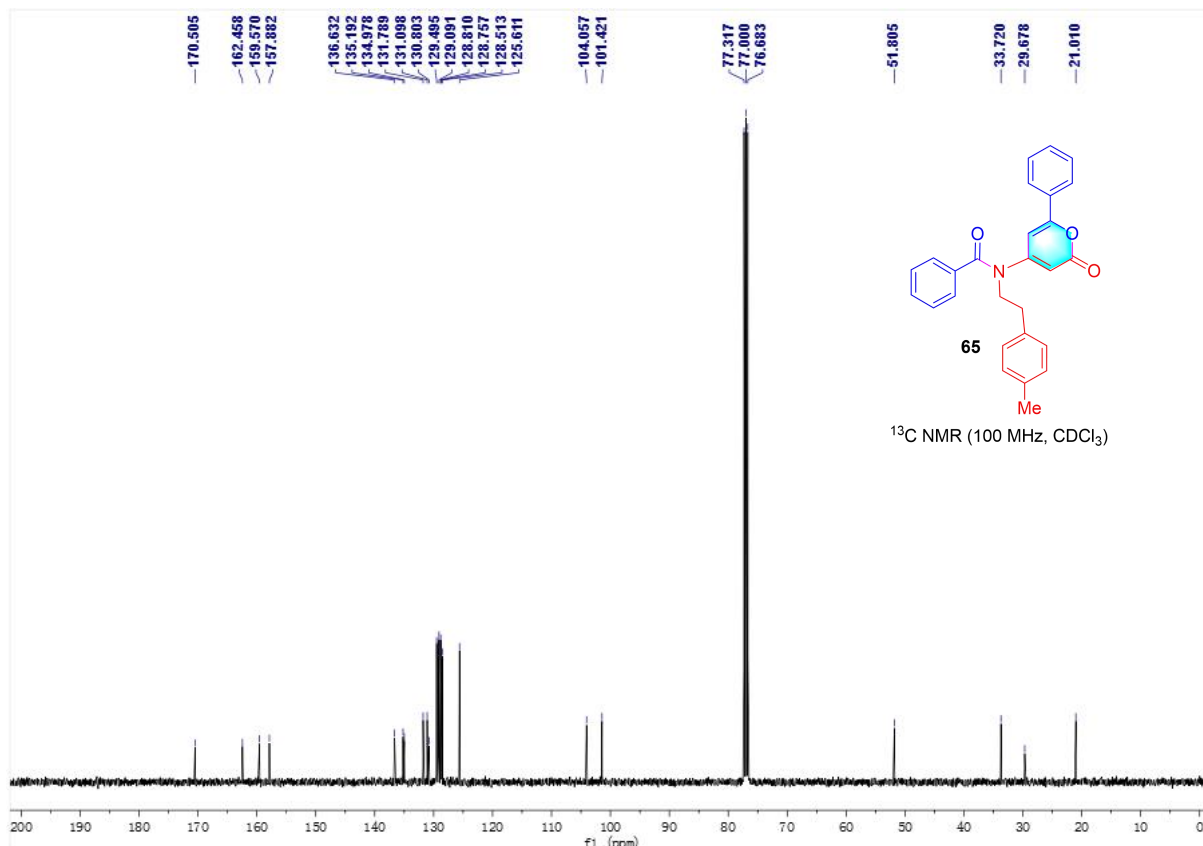

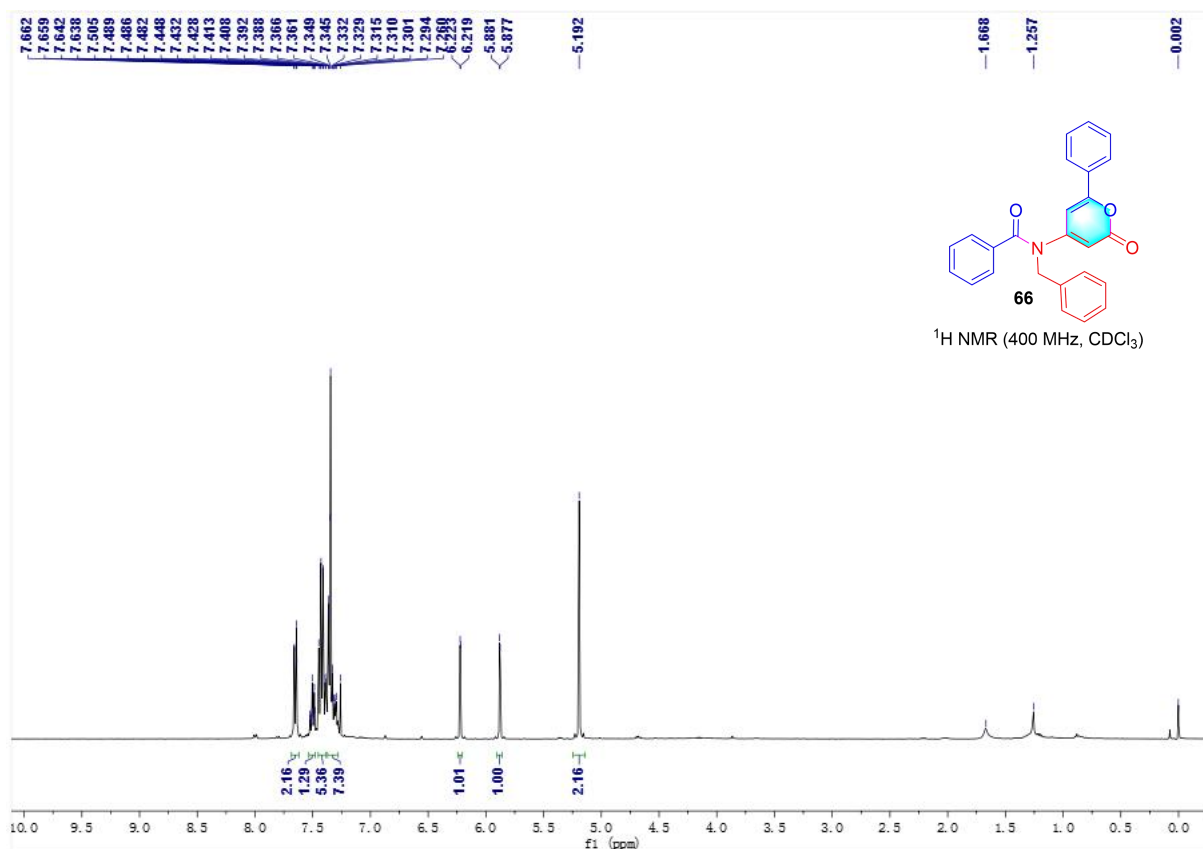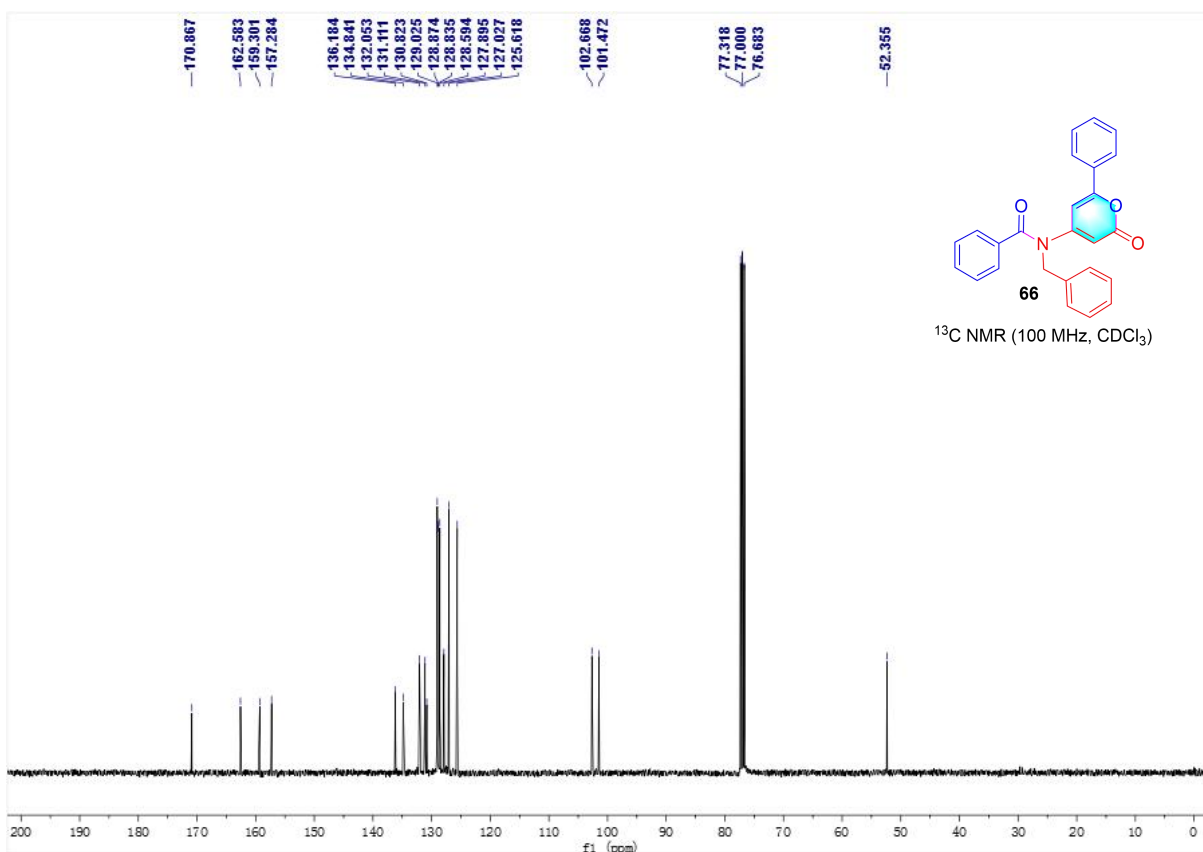

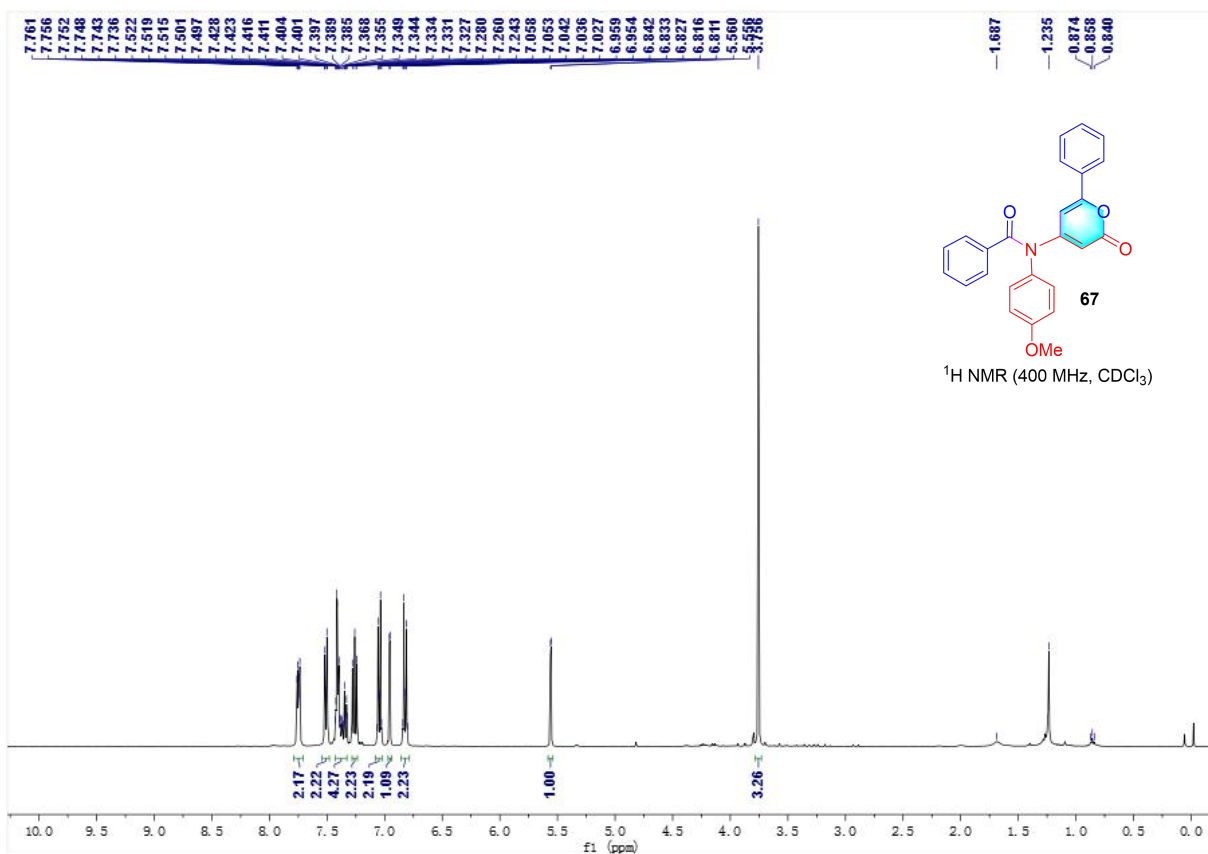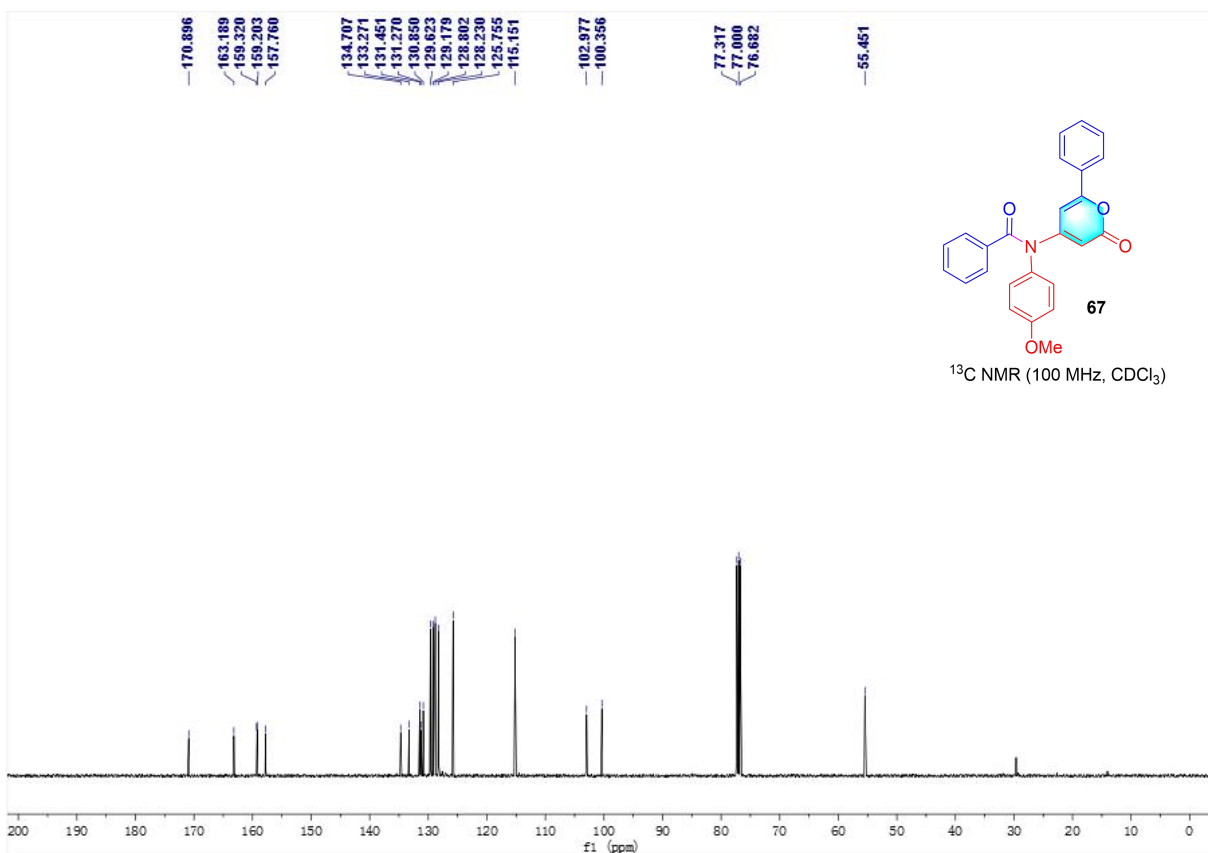



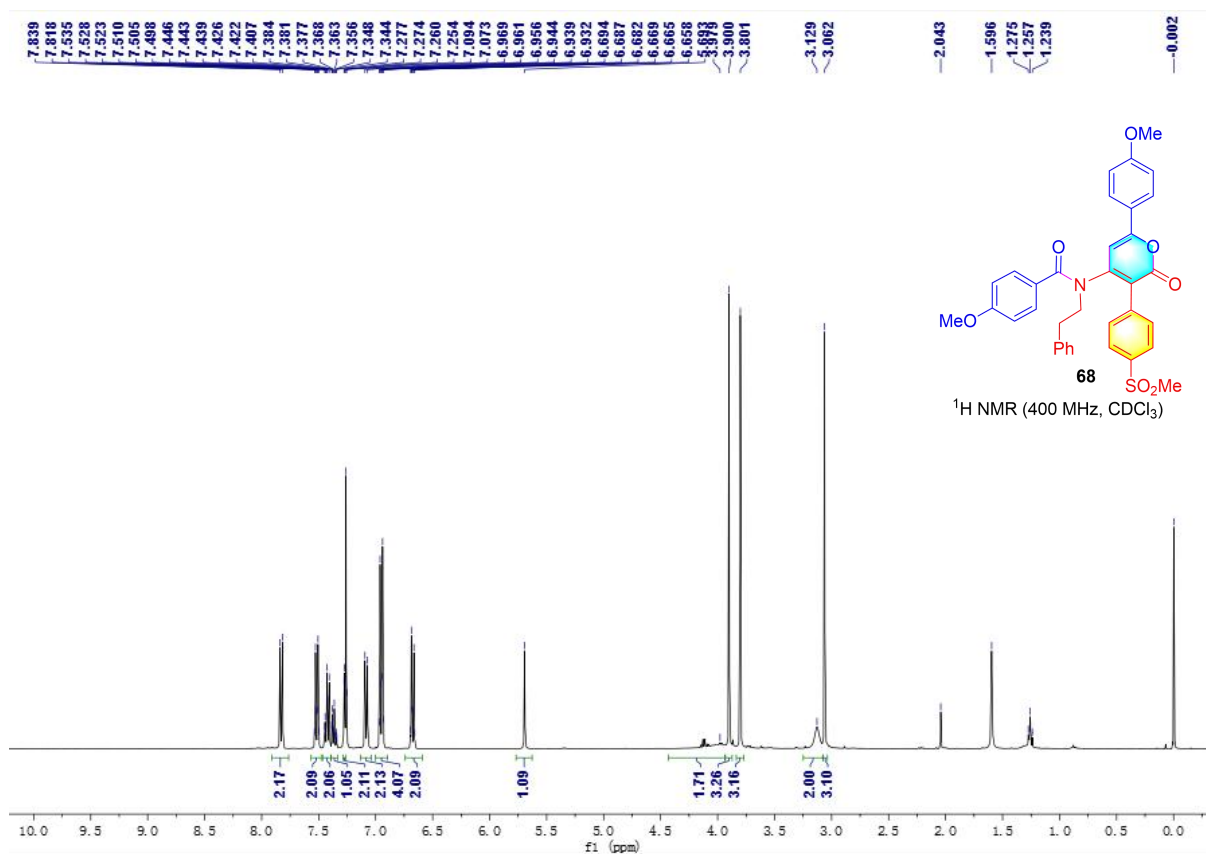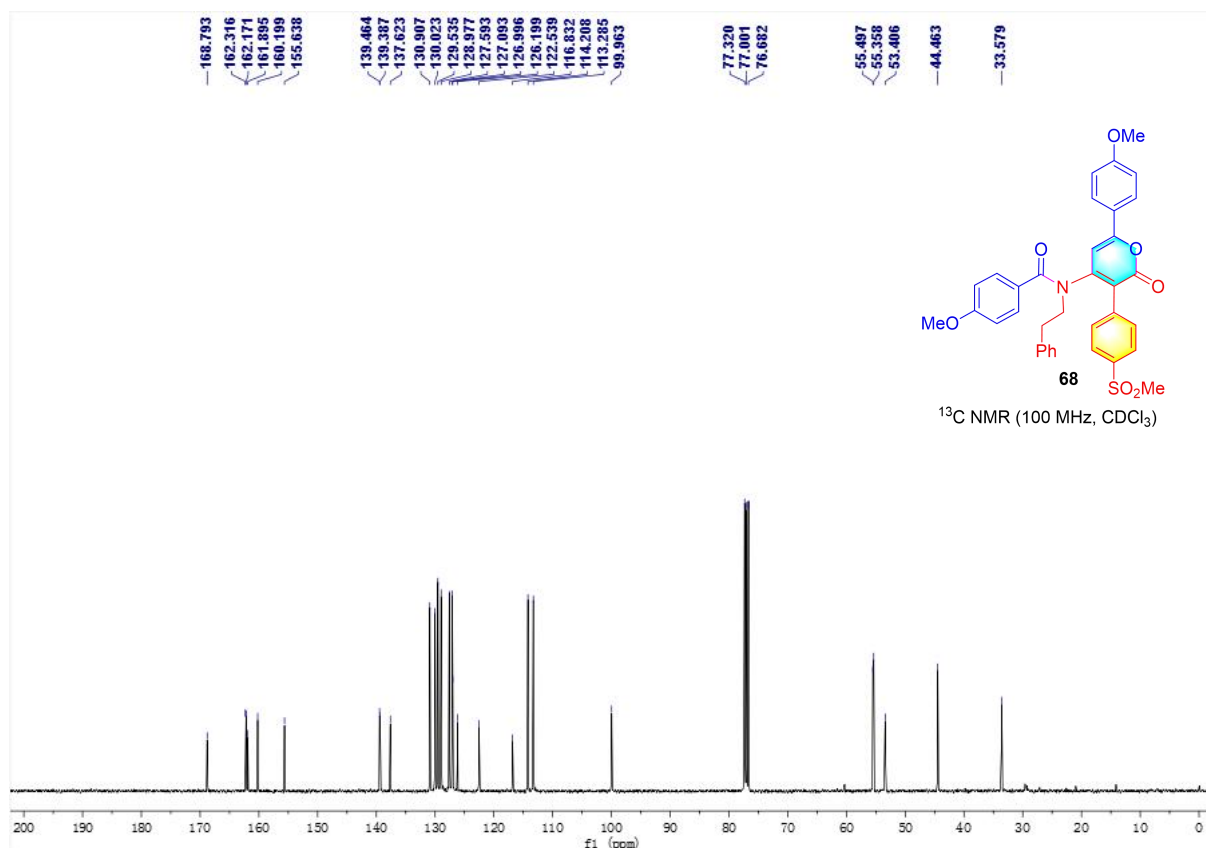

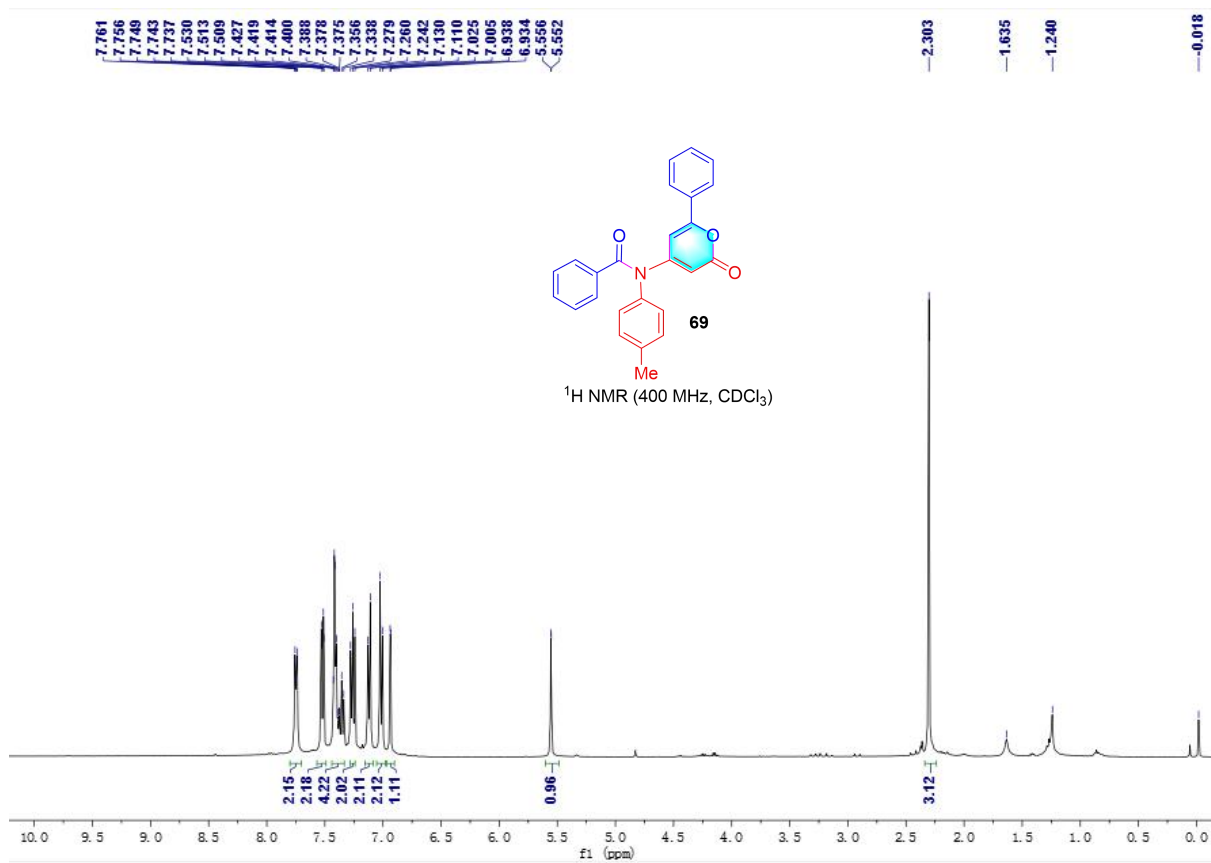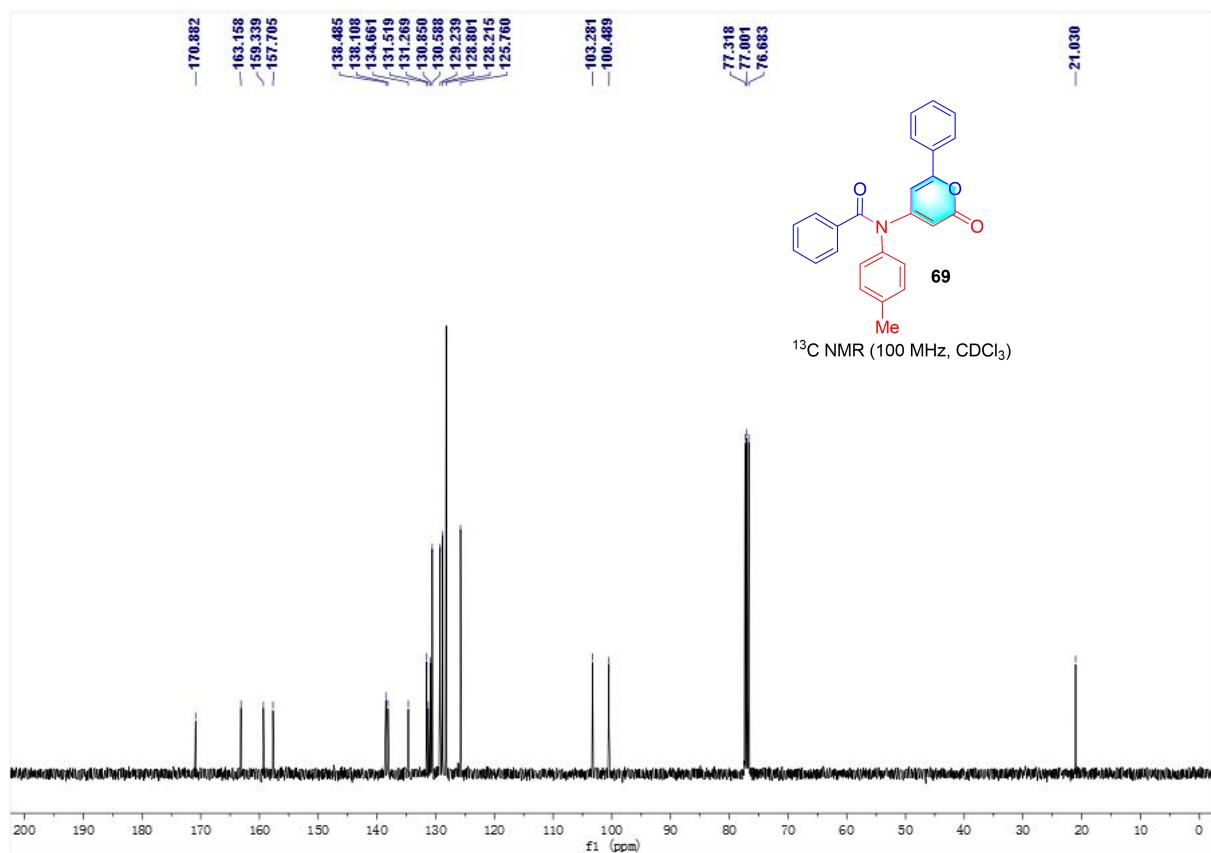

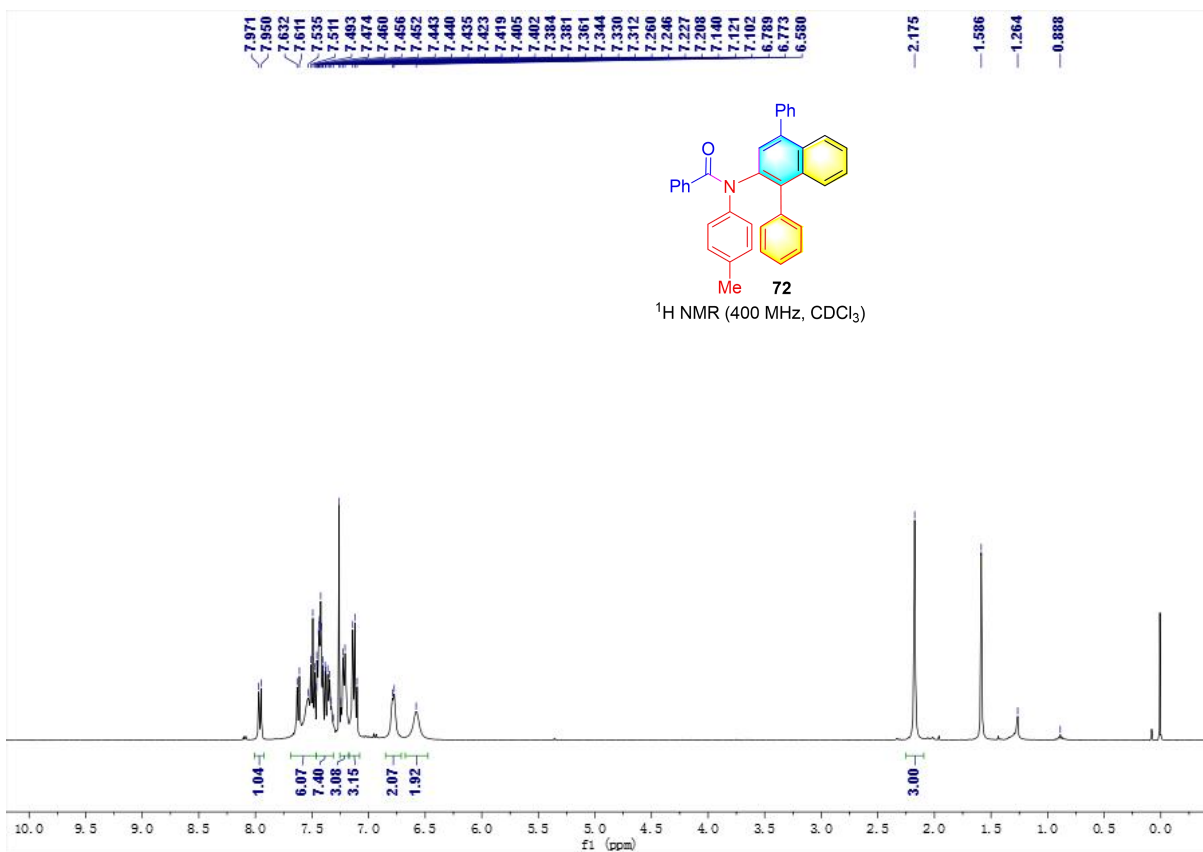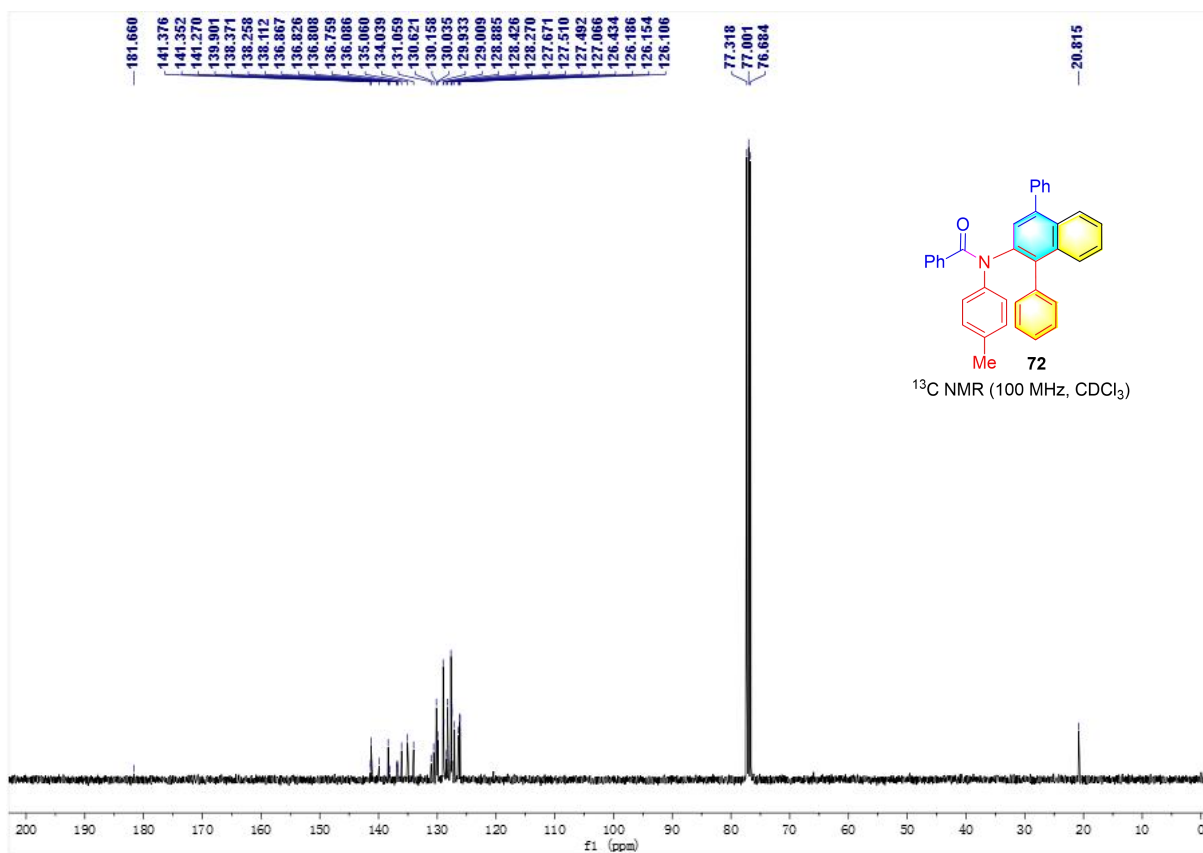

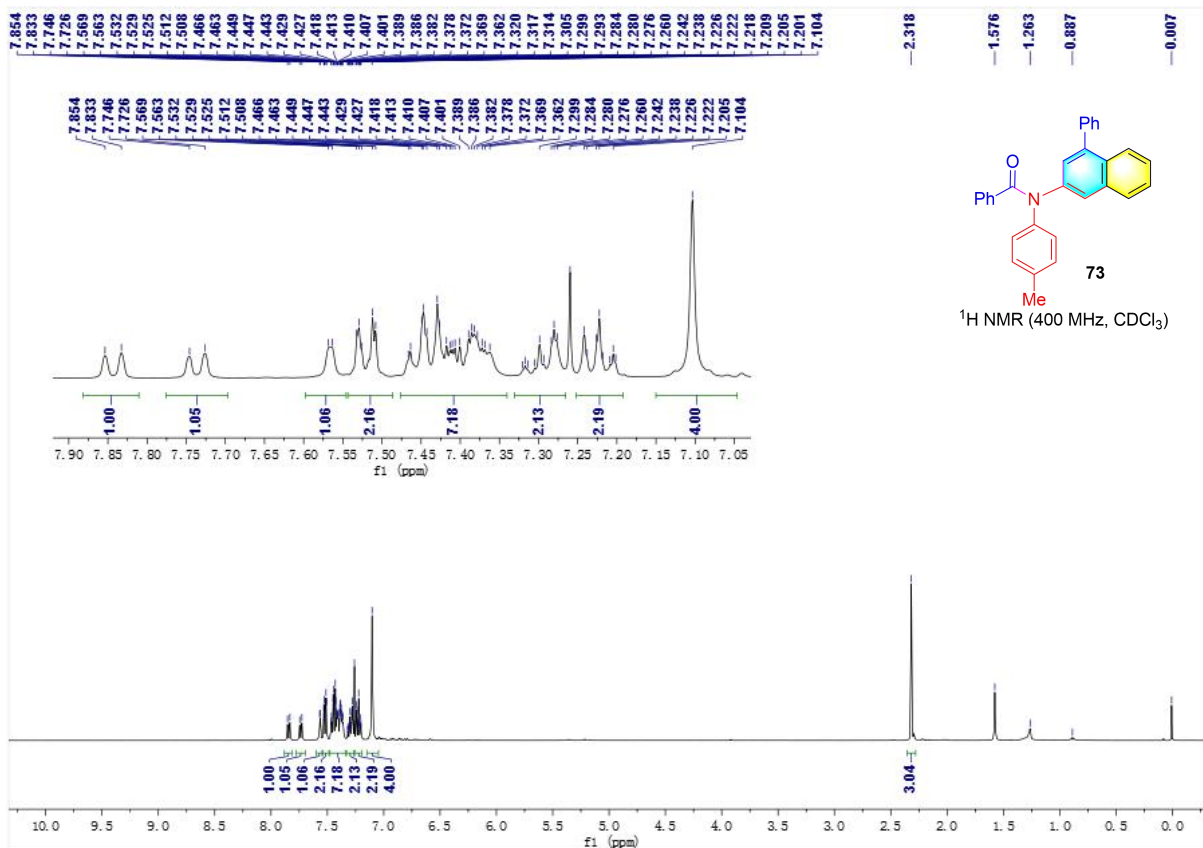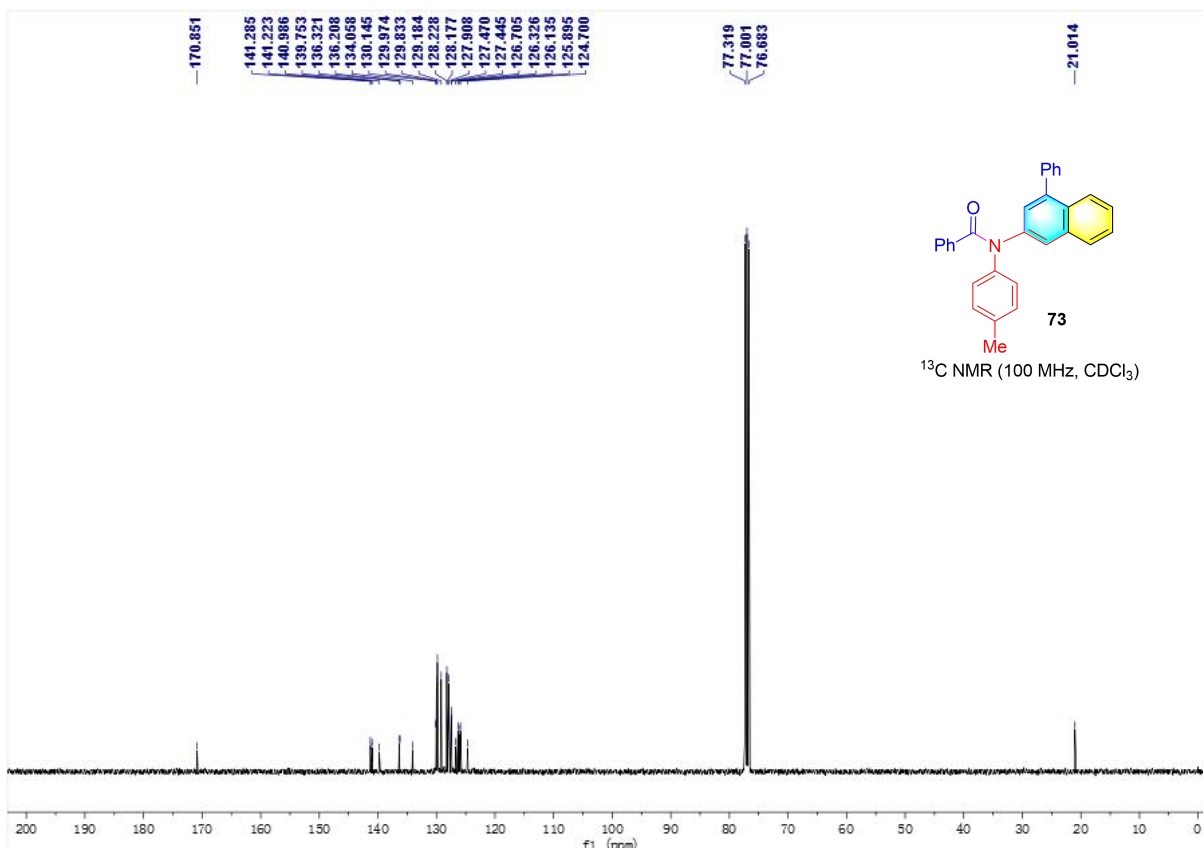

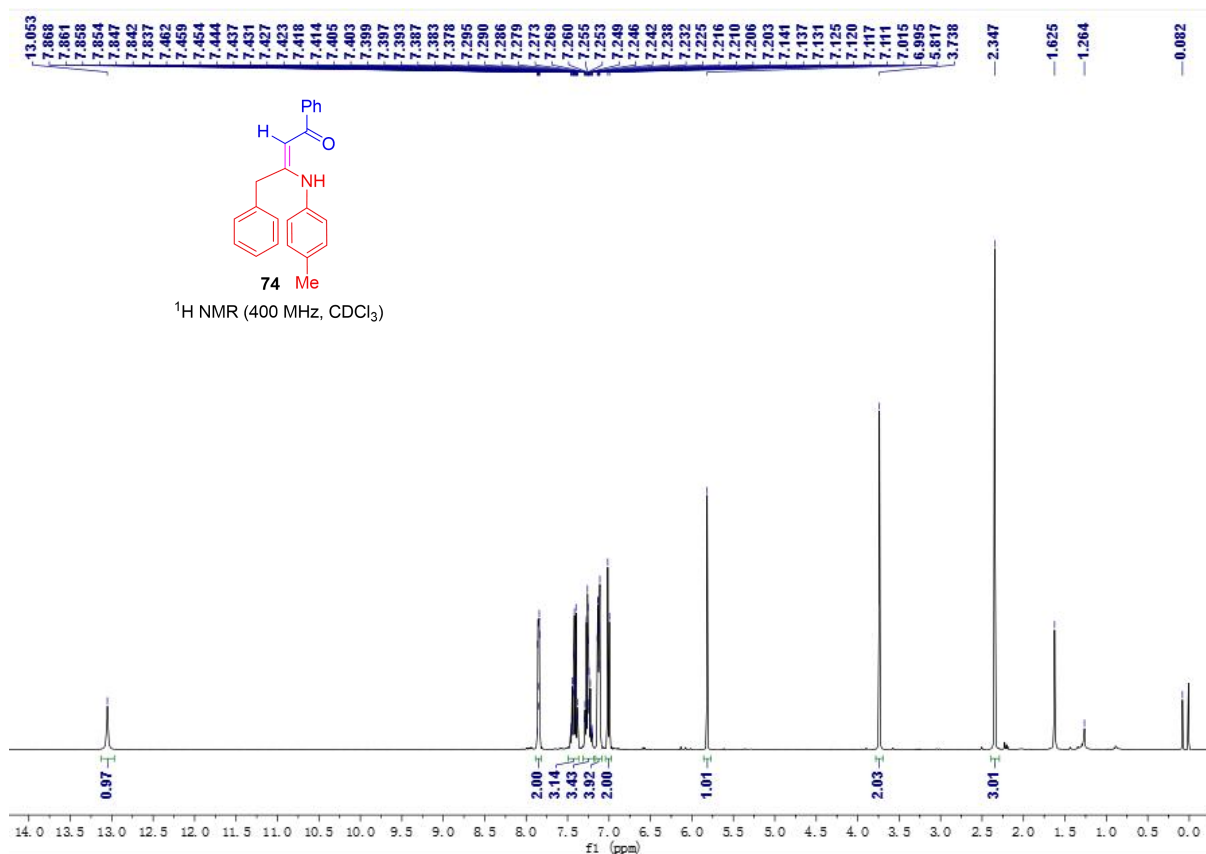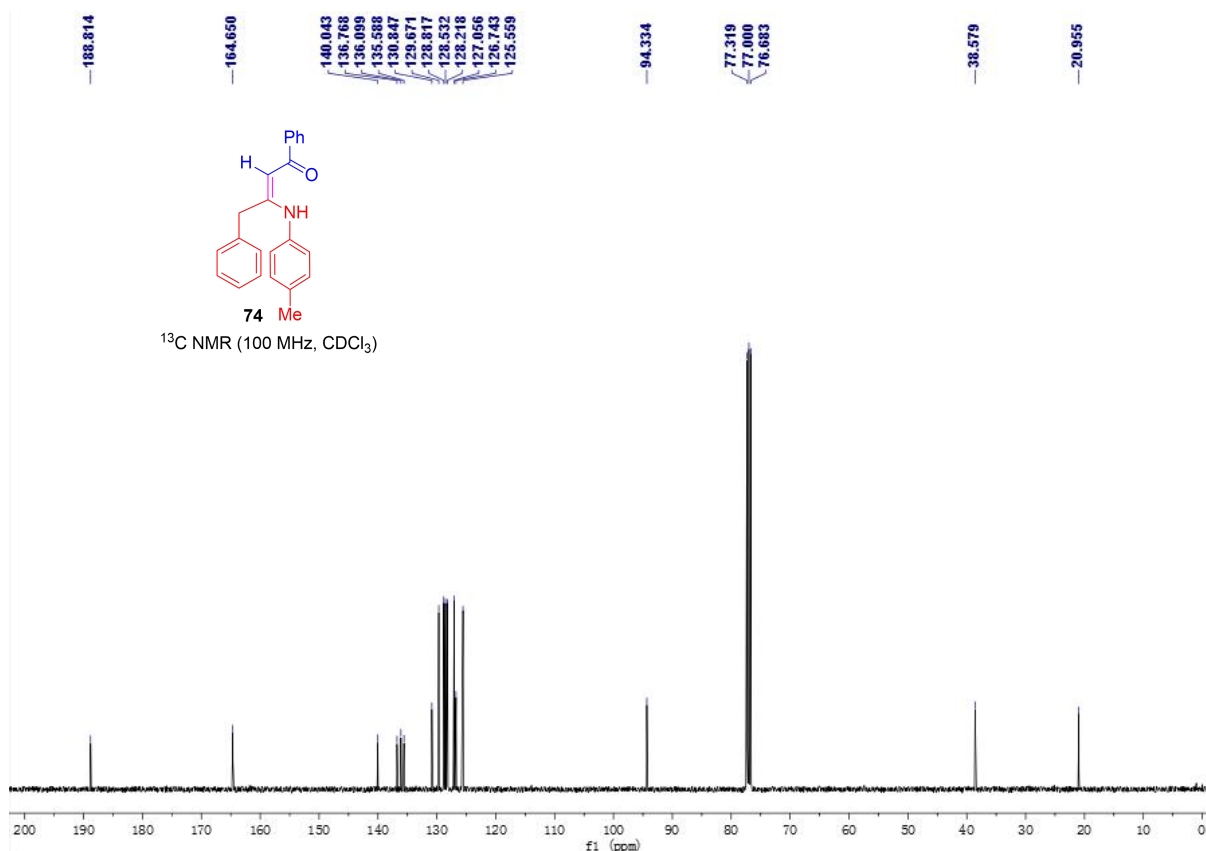

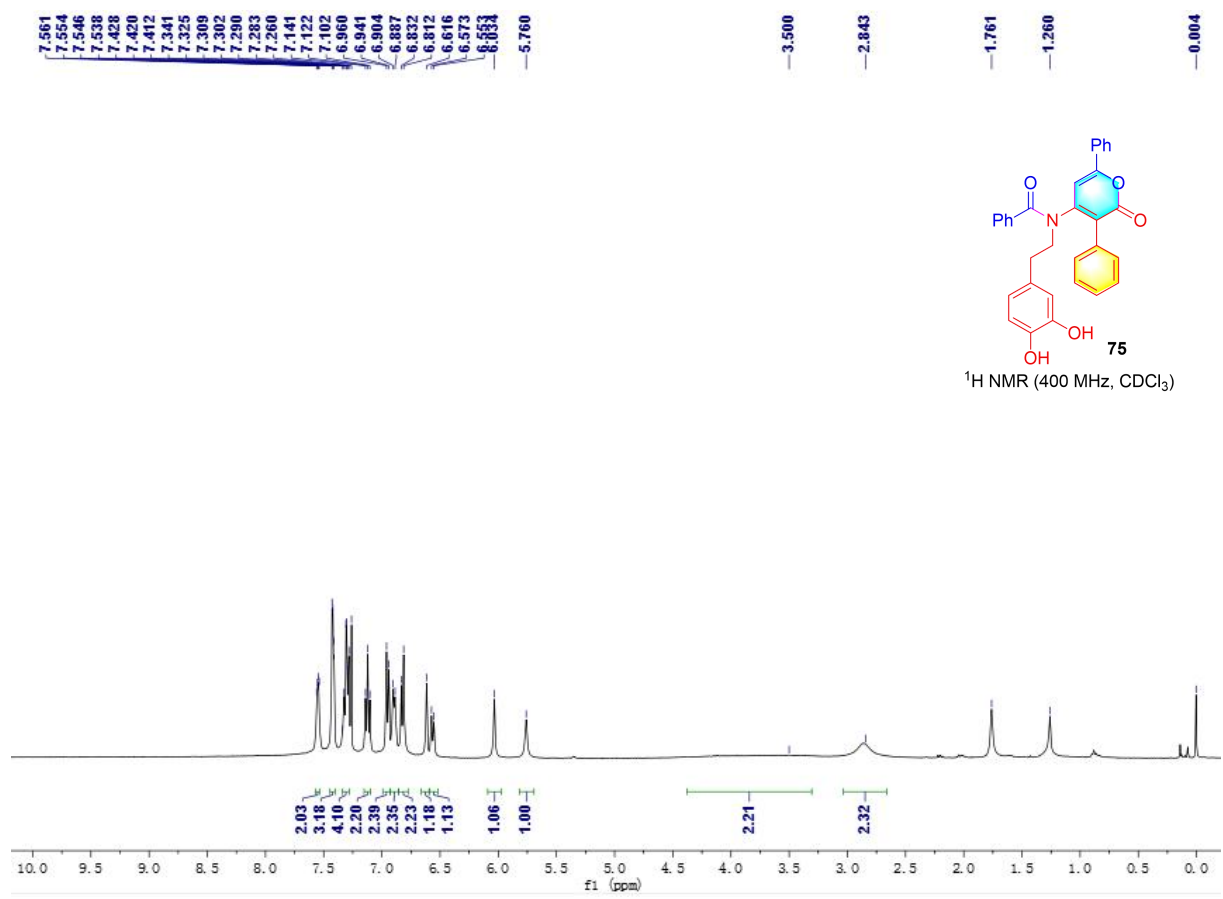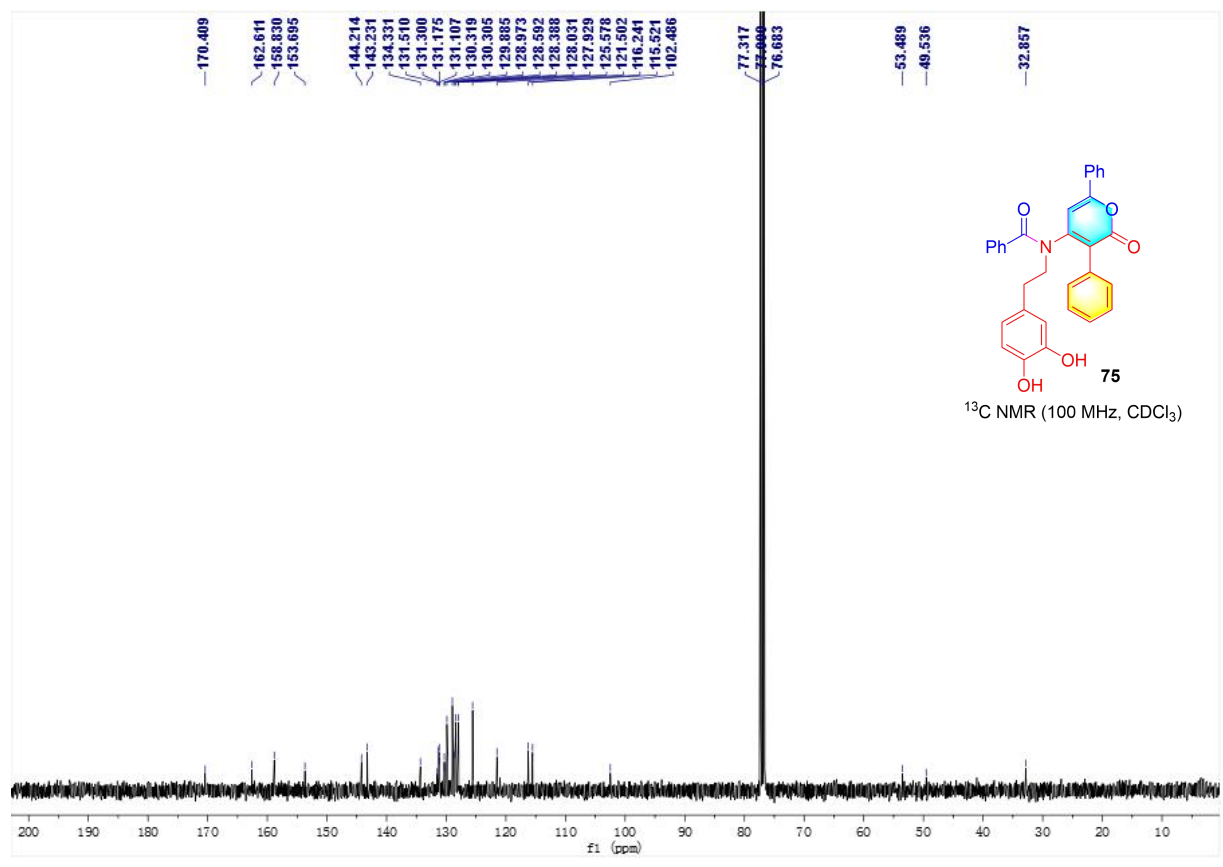

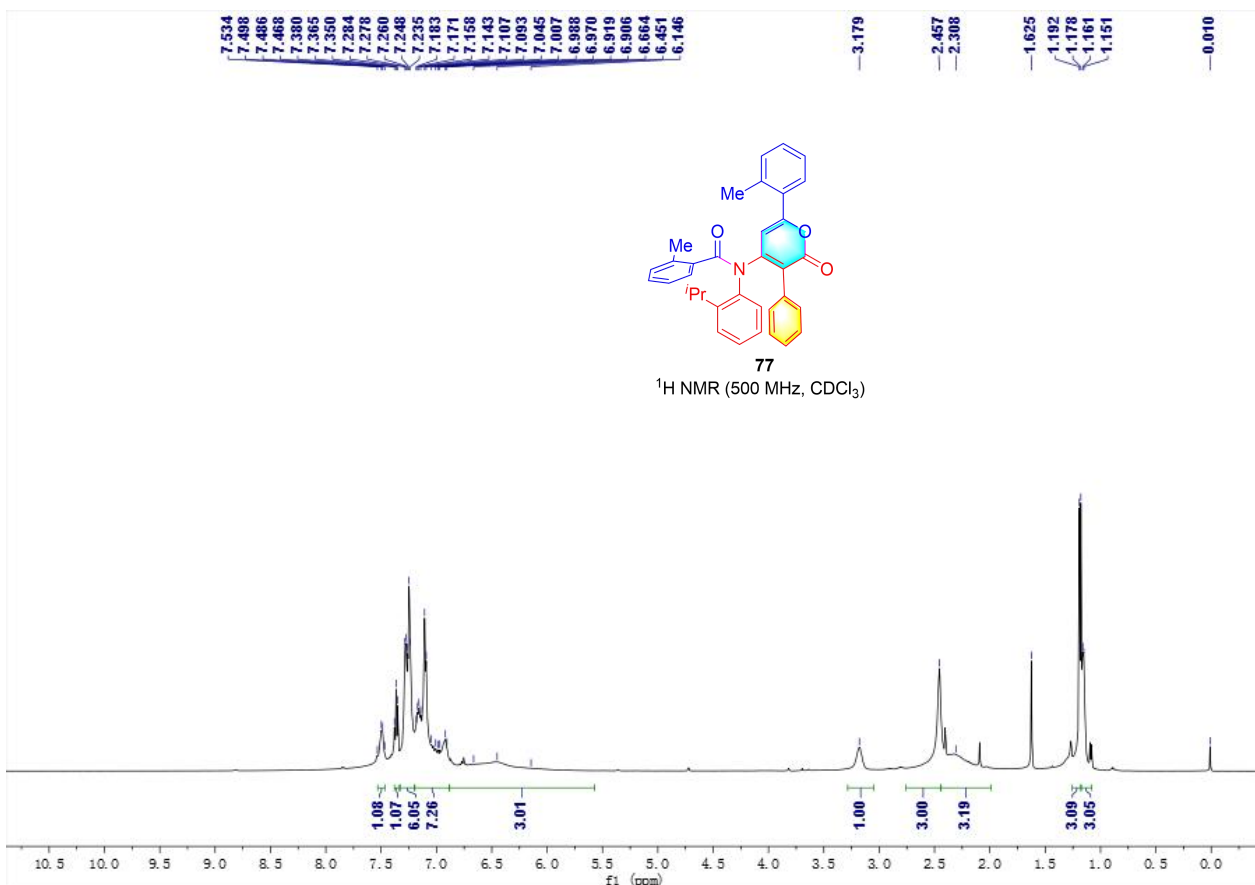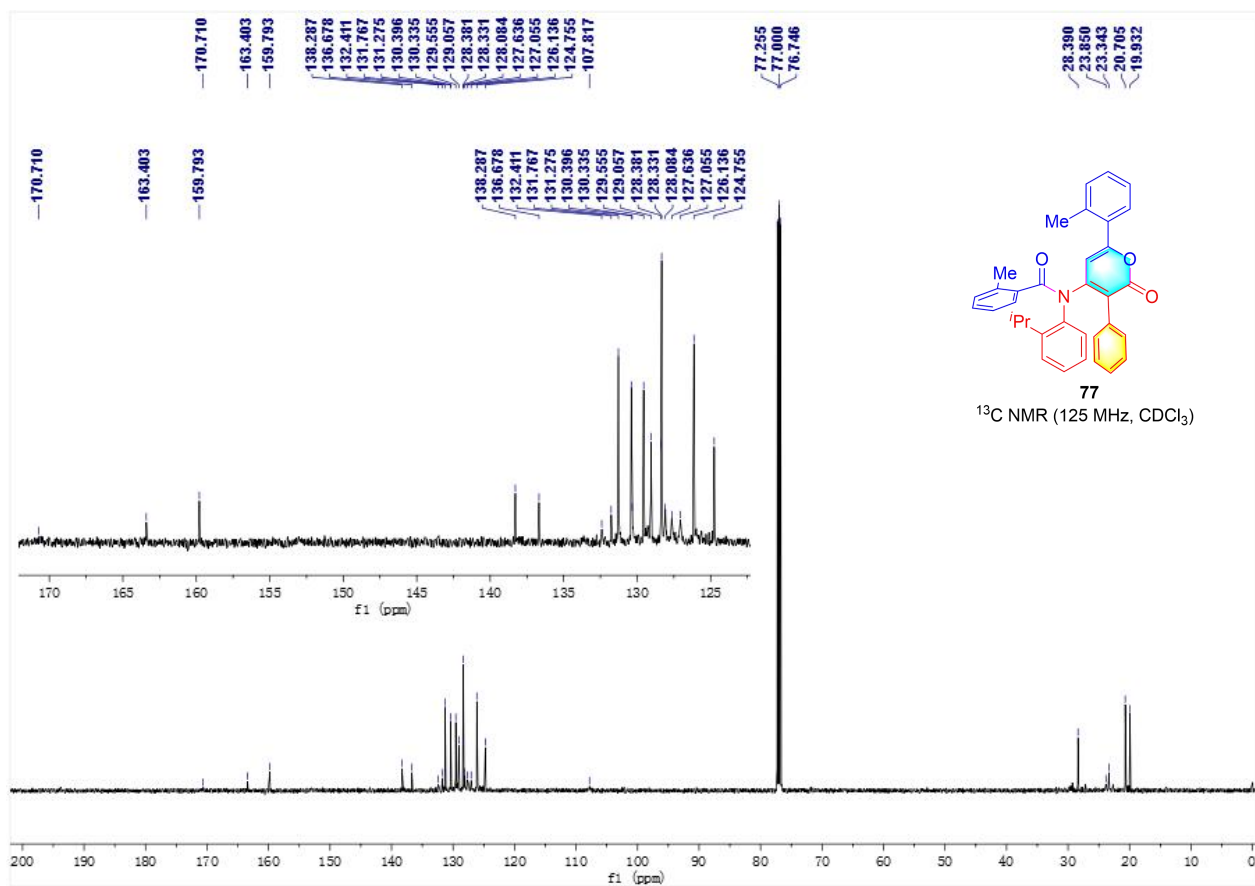



# 11) Copies of HPLC Spectra of Products 54-61

Peak Integration Report

|                    |                          |                  |               |
|--------------------|--------------------------|------------------|---------------|
| Sample Name:       | LJ-20210129-80-20-OD-RAC | Inj. Vol.:       | 1.00          |
| Injection Type:    | Check Standard           | Dilution Factor: | 1.0000        |
| Instrument Method: | lxt                      | Operator:        | Administrator |
| Inj. Date / Time:  | ##### Check Standard     | Run Time:        | 27.33         |

| No.           | Time min  | Peak Name          | Peak Type    | Area mAU*min   | Height mAU      | Relative Area %   | Amount n.a.   |
|---------------|-----------|--------------------|--------------|----------------|-----------------|-------------------|---------------|
| No.           | Peak Name | Retention Time min | Area mAU*min | Height mAU     | Relative Area % | Relative Height % |               |
| 1             |           | 14.713             | 131.793      | 177.215        | 50.05           | 54.64             |               |
| 2             |           | 17.858             | 131.555      | 147.103        | 49.95           | 45.36             |               |
| <b>Total:</b> |           |                    |              | <b>263.348</b> | <b>324.318</b>  | <b>100.00</b>     | <b>100.00</b> |

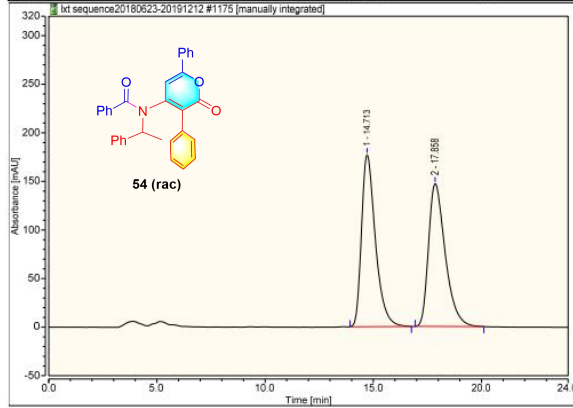

Peak Integration Report

|                    |                          |                  |               |
|--------------------|--------------------------|------------------|---------------|
| Sample Name:       | LJ-20210129-80-20-OD-ASY | Inj. Vol.:       | 1.00          |
| Injection Type:    | Check Standard           | Dilution Factor: | 1.0000        |
| Instrument Method: | lxt                      | Operator:        | Administrator |
| Inj. Date / Time:  | ##### Check Standard     | Run Time:        | 24.66         |

| No.           | Time min  | Peak Name          | Peak Type    | Area mAU*min    | Height mAU      | Relative Area %   | Amount n.a.   |
|---------------|-----------|--------------------|--------------|-----------------|-----------------|-------------------|---------------|
| No.           | Peak Name | Retention Time min | Area mAU*min | Height mAU      | Relative Area % | Relative Height % |               |
| 1             |           | 13.907             | 1577.994     | 2197.025        | 99.41           | 99.40             |               |
| 2             |           | 17.377             | 9.336        | 13.210          | 0.59            | 0.60              |               |
| <b>Total:</b> |           |                    |              | <b>1587.329</b> | <b>2210.235</b> | <b>100.00</b>     | <b>100.00</b> |

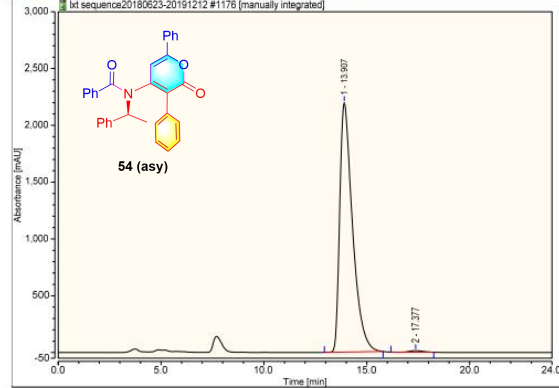

Peak Integration Report

|                    |                                      |                  |               |
|--------------------|--------------------------------------|------------------|---------------|
| Sample Name:       | LJ-20210423-80-20-OD-4-Cl-ketone-Rac | Inj. Vol.:       | 1.00          |
| Injection Type:    | Check Standard                       | Dilution Factor: | 1.0000        |
| Instrument Method: | lxt                                  | Operator:        | Administrator |
| Inj. Date / Time:  | ##### Check Standard                 | Run Time:        | 30.18         |

| No.           | Time min  | Peak Name          | Peak Type    | Area mAU*min   | Height mAU      | Relative Area %   | Amount n.a.   |
|---------------|-----------|--------------------|--------------|----------------|-----------------|-------------------|---------------|
| No.           | Peak Name | Retention Time min | Area mAU*min | Height mAU     | Relative Area % | Relative Height % |               |
| 1             |           | 10.233             | 302.229      | 601.116        | 50.19           | 70.12             |               |
| 2             |           | 23.565             | 299.987      | 256.179        | 49.81           | 29.88             |               |
| <b>Total:</b> |           |                    |              | <b>602.216</b> | <b>857.295</b>  | <b>100.00</b>     | <b>100.00</b> |

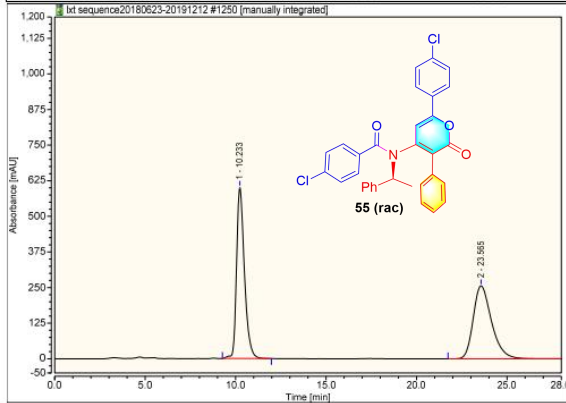

Peak Integration Report

|                    |                                      |                  |               |
|--------------------|--------------------------------------|------------------|---------------|
| Sample Name:       | LJ-20210423-80-20-OD-4-Cl-ketone-Asy | Inj. Vol.:       | 1.00          |
| Injection Type:    | Check Standard                       | Dilution Factor: | 1.0000        |
| Instrument Method: | lxt                                  | Operator:        | Administrator |
| Inj. Date / Time:  | ##### Check Standard                 | Run Time:        | 38.88         |

| No.           | Time min  | Peak Name          | Peak Type    | Area mAU*min   | Height mAU      | Relative Area %   | Amount n.a.   |
|---------------|-----------|--------------------|--------------|----------------|-----------------|-------------------|---------------|
| No.           | Peak Name | Retention Time min | Area mAU*min | Height mAU     | Relative Area % | Relative Height % |               |
| 1             |           | 10.722             | 0.972        | 2.087          | 0.95            | 2.53              |               |
| 2             |           | 24.780             | 101.449      | 80.431         | 99.05           | 97.47             |               |
| <b>Total:</b> |           |                    |              | <b>102.421</b> | <b>82.518</b>   | <b>100.00</b>     | <b>100.00</b> |

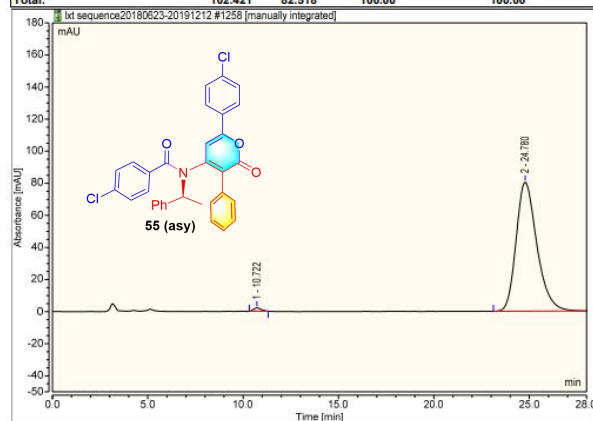



**Peak Integration Report**

|                    |                                      |                  |               |
|--------------------|--------------------------------------|------------------|---------------|
| Sample Name:       | LJ-20210426-80-20-OD-4-Me-ketone-Rac | Inj. Vol:        | 1.00          |
| Injection Type:    | Check Standard                       | Dilution Factor: | 1.0000        |
| Instrument Method: | lxt                                  | Operator:        | Administrator |
| Inj. Date / Time:  | ##### Check Standard                 | Run Time:        | 13.55         |

| No.           | Time min  | Peak Name          | Peak Type    | Area mAU*min   | Height mAU      | Amount n.a.       |
|---------------|-----------|--------------------|--------------|----------------|-----------------|-------------------|
| No.           | Peak Name | Retention Time min | Area mAU*min | Height mAU     | Relative Area % | Relative Height % |
| 1             |           | 7.688              | 74.576       | 205.248        | 50.80           | 59.66             |
| 2             |           | 9.190              | 72.219       | 138.780        | 49.20           | 40.34             |
| <b>Total:</b> |           |                    |              | <b>146.795</b> | <b>344.029</b>  | <b>100.00</b>     |

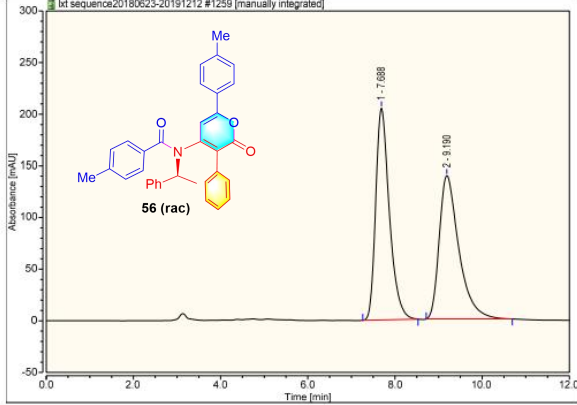

**Peak Integration Report**

|                    |                                      |                  |               |
|--------------------|--------------------------------------|------------------|---------------|
| Sample Name:       | LJ-20210426-80-20-OD-4-Me-ketone-Asy | Inj. Vol:        | 1.00          |
| Injection Type:    | Check Standard                       | Dilution Factor: | 1.0000        |
| Instrument Method: | lxt                                  | Operator:        | Administrator |
| Inj. Date / Time:  | ##### Check Standard                 | Run Time:        | 15.39         |

| No.           | Time min  | Peak Name          | Peak Type    | Area mAU*min   | Height mAU      | Amount n.a.       |
|---------------|-----------|--------------------|--------------|----------------|-----------------|-------------------|
| No.           | Peak Name | Retention Time min | Area mAU*min | Height mAU     | Relative Area % | Relative Height % |
| 1             |           | 7.622              | 2.358        | 7.066          | 1.55            | 2.47              |
| 2             |           | 9.063              | 150.250      | 278.458        | 98.45           | 97.53             |
| <b>Total:</b> |           |                    |              | <b>152.608</b> | <b>285.523</b>  | <b>100.00</b>     |

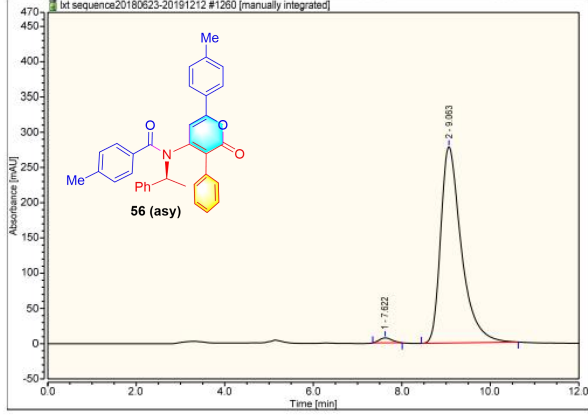

**Peak Integration Report**

|                    |                                         |                  |               |
|--------------------|-----------------------------------------|------------------|---------------|
| Sample Name:       | LJ-20210512-80-20-OD-4-OMe-ketone-Rac-2 | Inj. Vol:        | 1.00          |
| Injection Type:    | Check Standard                          | Dilution Factor: | 1.0000        |
| Instrument Method: | lxt                                     | Operator:        | Administrator |
| Inj. Date / Time:  | ##### Check Standard                    | Run Time:        | 21.67         |

| No.           | Time min  | Peak Name          | Peak Type    | Area mAU*min   | Height mAU      | Amount n.a.       |
|---------------|-----------|--------------------|--------------|----------------|-----------------|-------------------|
| No.           | Peak Name | Retention Time min | Area mAU*min | Height mAU     | Relative Area % | Relative Height % |
| 1             |           | 12.902             | 95.957       | 147.145        | 50.00           | 60.40             |
| 2             |           | 16.770             | 95.949       | 96.458         | 50.00           | 39.60             |
| <b>Total:</b> |           |                    |              | <b>191.906</b> | <b>243.633</b>  | <b>100.00</b>     |

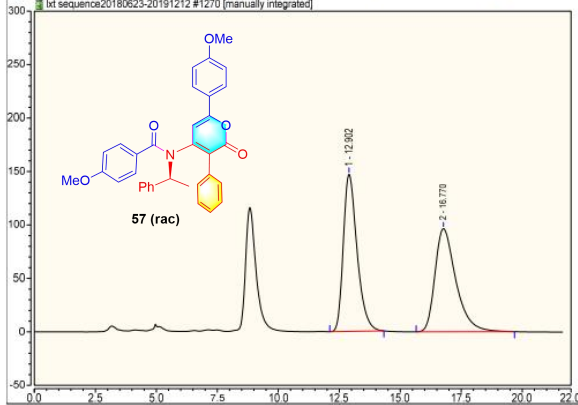

**Peak Integration Report**

|                    |                                       |                  |               |
|--------------------|---------------------------------------|------------------|---------------|
| Sample Name:       | LJ-20210512-80-20-OD-4-OMe-ketone-Asy | Inj. Vol:        | 1.00          |
| Injection Type:    | Check Standard                        | Dilution Factor: | 1.0000        |
| Instrument Method: | lxt                                   | Operator:        | Administrator |
| Inj. Date / Time:  | ##### Check Standard                  | Run Time:        | 23.41         |

| No.           | Time min  | Peak Name          | Peak Type    | Area mAU*min   | Height mAU      | Amount n.a.       |
|---------------|-----------|--------------------|--------------|----------------|-----------------|-------------------|
| No.           | Peak Name | Retention Time min | Area mAU*min | Height mAU     | Relative Area % | Relative Height % |
| 1             |           | 12.728             | 3.277        | 6.584          | 0.61            | 1.12              |
| 2             |           | 16.302             | 537.940      | 581.700        | 99.39           | 98.88             |
| <b>Total:</b> |           |                    |              | <b>541.217</b> | <b>588.284</b>  | <b>100.00</b>     |

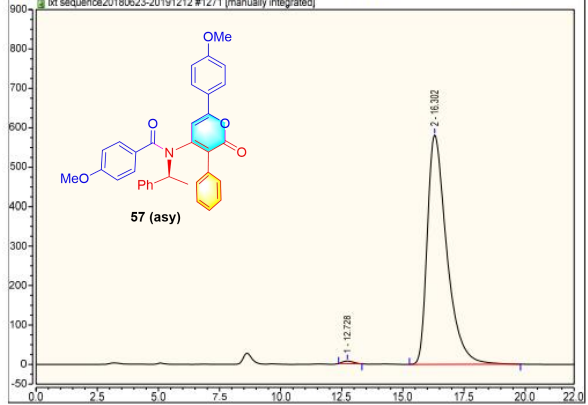

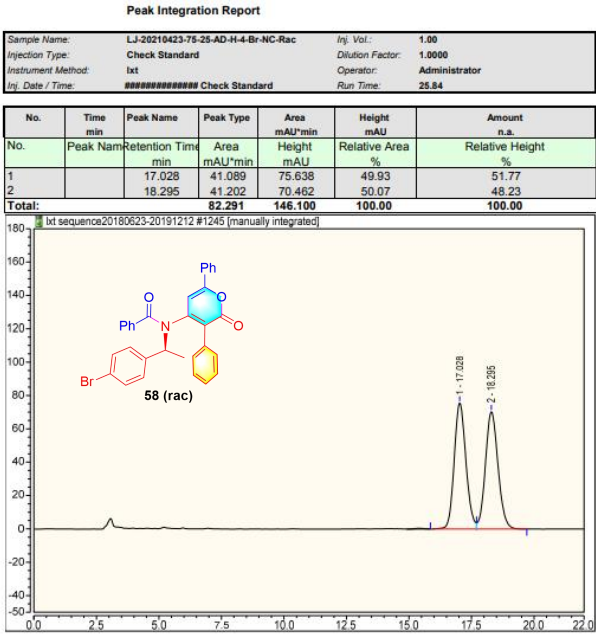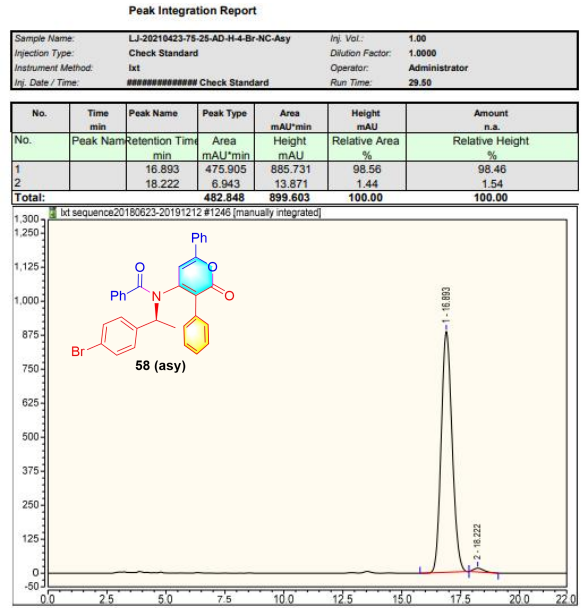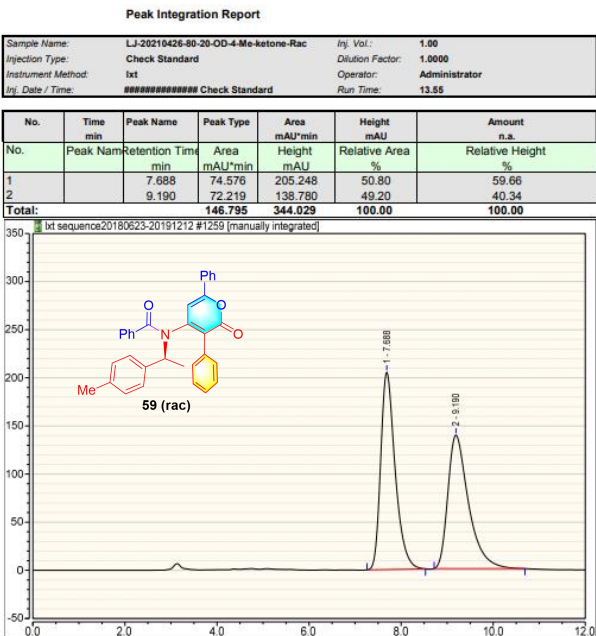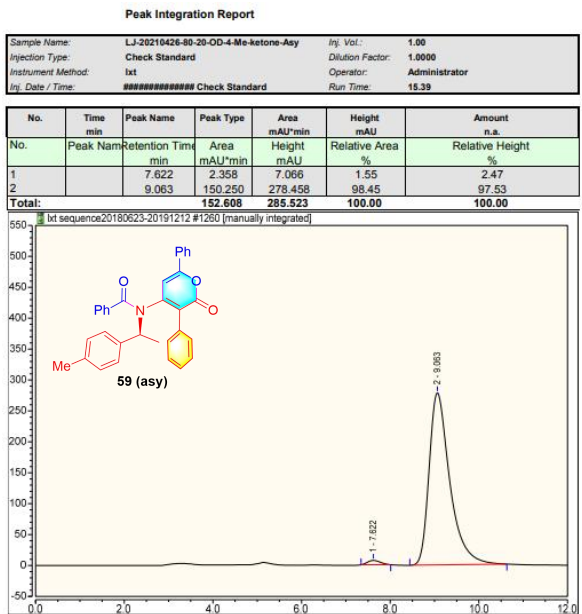

**Peak Integration Report**

|                    |                                 |                  |               |
|--------------------|---------------------------------|------------------|---------------|
| Sample Name:       | IJ-20210406-4Br-N2-Rac-80-20-OD | Inj. Vol.:       | 1.00          |
| Injection Type:    | Check Standard                  | Dilution Factor: | 1.0000        |
| Instrument Method: | Ixt                             | Operator:        | Administrator |
| Inj. Date / Time:  | ##### Check Standard            | Run Time:        | 30.09         |

| No.           | Time min  | Peak Name          | Peak Type      | Area mAU*min   | Height mAU      | Relative Area %   | Amount n.s. |
|---------------|-----------|--------------------|----------------|----------------|-----------------|-------------------|-------------|
| No.           | Peak Name | Retention Time min | Area mAU*min   | Height mAU     | Relative Area % | Relative Height % |             |
| 1             |           | 10.577             | 125.154        | 223.864        | 50.65           | 65.25             |             |
| 2             |           | 20.472             | 121.930        | 119.197        | 49.35           | 34.75             |             |
| <b>Total:</b> |           |                    | <b>247.084</b> | <b>343.061</b> | <b>100.00</b>   | <b>100.00</b>     |             |

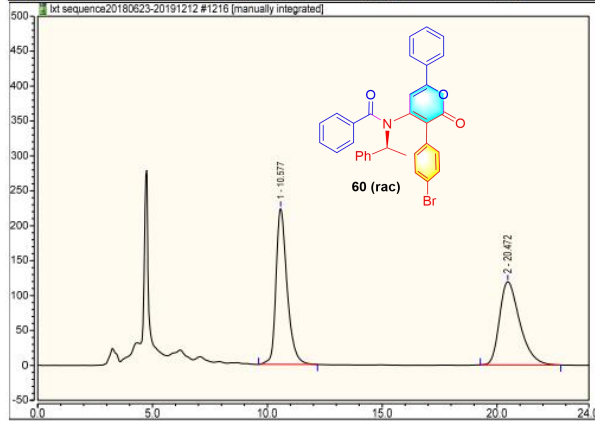

**Peak Integration Report**

|                    |                                 |                  |               |
|--------------------|---------------------------------|------------------|---------------|
| Sample Name:       | IJ-20210406-4Br-N2-Asy-80-20-OD | Inj. Vol.:       | 1.00          |
| Injection Type:    | Check Standard                  | Dilution Factor: | 1.0000        |
| Instrument Method: | Ixt                             | Operator:        | Administrator |
| Inj. Date / Time:  | ##### Check Standard            | Run Time:        | 30.18         |

| No.           | Time min  | Peak Name          | Peak Type      | Area mAU*min   | Height mAU      | Relative Area %   | Amount n.s. |
|---------------|-----------|--------------------|----------------|----------------|-----------------|-------------------|-------------|
| No.           | Peak Name | Retention Time min | Area mAU*min   | Height mAU     | Relative Area % | Relative Height % |             |
| 1             |           | 10.508             | 328.659        | 609.872        | 99.98           | 98.14             |             |
| 2             |           | 20.608             | 10.230         | 11.575         | 3.02            | 1.86              |             |
| <b>Total:</b> |           |                    | <b>338.889</b> | <b>621.447</b> | <b>100.00</b>   | <b>100.00</b>     |             |

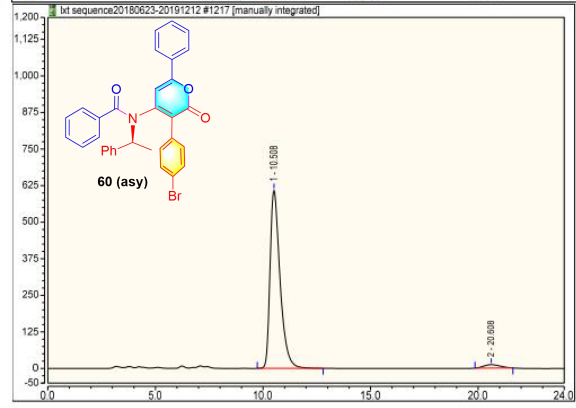

**Peak Integration Report**

|                    |                                  |                  |               |
|--------------------|----------------------------------|------------------|---------------|
| Sample Name:       | IJ-20210409-3-Me-N2-Rac-80-20-OD | Inj. Vol.:       | 1.00          |
| Injection Type:    | Check Standard                   | Dilution Factor: | 1.0000        |
| Instrument Method: | Ixt                              | Operator:        | Administrator |
| Inj. Date / Time:  | ##### Check Standard             | Run Time:        | 20.87         |

| No.           | Time min  | Peak Name          | Peak Type      | Area mAU*min   | Height mAU      | Relative Area %   | Amount n.s. |
|---------------|-----------|--------------------|----------------|----------------|-----------------|-------------------|-------------|
| No.           | Peak Name | Retention Time min | Area mAU*min   | Height mAU     | Relative Area % | Relative Height % |             |
| 1             |           | 10.513             | 73.086         | 135.491        | 50.49           | 53.72             |             |
| 2             |           | 12.543             | 71.672         | 116.728        | 49.51           | 46.28             |             |
| <b>Total:</b> |           |                    | <b>144.758</b> | <b>252.219</b> | <b>100.00</b>   | <b>100.00</b>     |             |

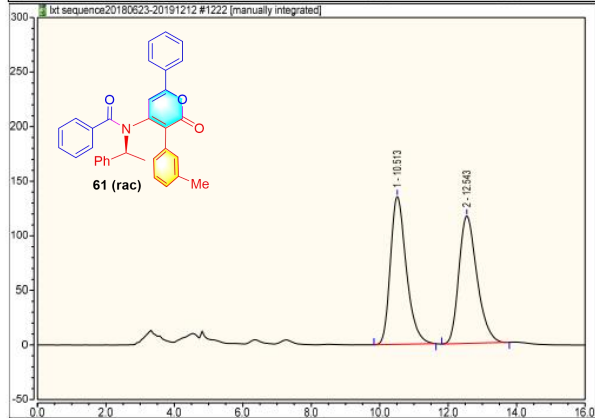

**Peak Integration Report**

|                    |                                  |                  |               |
|--------------------|----------------------------------|------------------|---------------|
| Sample Name:       | IJ-20210409-3-Me-N2-Asy-80-20-OD | Inj. Vol.:       | 1.00          |
| Injection Type:    | Check Standard                   | Dilution Factor: | 1.0000        |
| Instrument Method: | Ixt                              | Operator:        | Administrator |
| Inj. Date / Time:  | ##### Check Standard             | Run Time:        | 19.67         |

| No.           | Time min  | Peak Name          | Peak Type       | Area mAU*min    | Height mAU      | Relative Area %   | Amount n.s. |
|---------------|-----------|--------------------|-----------------|-----------------|-----------------|-------------------|-------------|
| No.           | Peak Name | Retention Time min | Area mAU*min    | Height mAU      | Relative Area % | Relative Height % |             |
| 1             |           | 10.340             | 1253.528        | 2470.842        | 99.30           | 99.33             |             |
| 2             |           | 12.513             | 8.861           | 16.773          | 0.70            | 0.67              |             |
| <b>Total:</b> |           |                    | <b>1262.389</b> | <b>2487.615</b> | <b>100.00</b>   | <b>100.00</b>     |             |

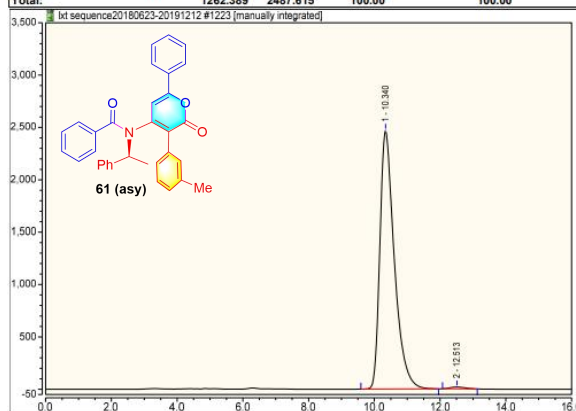

Supplement: d3gc02073h1.pdf [file d3gc02073h1.pdf]
